# Supplementary material for: Misfolded GPI-anchored proteins are escorted through the secretory pathway by ER-derived factors
Source: eLife. 2019 May 16;8:e46740. doi: 10.7554/eLife.46740 (PMC6541436; doi:10.7554/eLife.46740)
Supplement: Figure 5—source data 1. — The eight samples corresponding to the four time points each for WT and ∆TMED10 cells from Figure 5D were analyzed by tandem mass tagging (TMT) quantitative proteomics and the data tabulated in the Excel table. Each tab of the Excel table illustrates the sequential steps in the normalization and analysis of the raw data, ending in the graph depicted in Figure 5E. [file elife-46740-fig5-data1.xlsx]

## Sheet: All Proteins
Accession	Description	MW [kDa]	Abundance: F1: 126, Sample, 0 , WT	Abundance: F1: 127N, Sample, 30 , WT	Abundance: F1: 127C, Sample, 60 , WT	Abundance: F1: 128N, Sample, 120 , WT	Abundance: F1: 129N, Sample, 0 , KO	Abundance: F1: 130N, Sample, 30 , KO	Abundance: F1: 130C, Sample, 60 , KO	Abundance: F1: 131, Sample, 120 , KO	emPAI	# Razor Peptides	Score Mascot	# Peptides	Total Abund.	Abund. Rank	Notes
P04925	Major prion protein OS=Mus musculus GN=Prnp PE=1SV=2	55.685	47489.9	41987	37103.8	45160.6	65545.3	45230.2	39365.8	34733.7	6699.19	0	10118.6	29	356616	1	A total of 2131 proteins were identified for which there was quantitative data available for each sample [wild type (WT) and TMED10 knockout (KO)] at every time point (0, 30, 60, and 120 min of ER stress induced by Thapsigargin). The "Total Abundance" was calculated by summing the abundance values across all time points, and the table is sorted in descending order. The range of abundances span ~4…
P11021	78 kDa glucose-regulated protein OS=Homo sapiens GN=HSPA5 PE=1 SV=2	72.288	50167.3	27235.1	14076.7	30135.6	58594.3	38490.7	28769.5	41782.3	1250.88	4	8904.55	41	289252	2
P07437	Tubulin beta chain OS=Homo sapiens GN=TUBB PE=1 SV=2	49.639	40455.9	28980.2	25537.2	30236.6	56532.6	37856.7	25058.6	28265.1	11052	32	9757.63	25	272923	3
F5H5D3	Tubulin alpha-1C chain OS=Homo sapiens GN=TUBA1C PE=1 SV=1	57.693	38543.7	30471.4	25060.5	29238.7	55787.2	36222.5	23415.3	26873.7	1267.96	32	10367.1	24	265613	4
P27824-2	Isoform 2 of Calnexin OS=Homo sapiens GN=CANX	71.458	29991.4	22501.4	17123.7	20698.6	55311.4	40515.6	23066.5	38242.4	999	11	3697.36	39	247451	5
P55072	Transitional endoplasmic reticulum ATPase OS=Homo sapiens GN=VCP PE=1 SV=4	89.266	15016.8	21617.3	19384.8	16591.7	25965.9	35894.9	32088.4	32696.5	617.966	0	7355.84	55	199256	6
P05141	ADP/ATP translocase 2 OS=Homo sapiens GN=SLC25A5 PE=1 SV=7	32.831	17944.7	12023.9	10752.4	13811.6	23463.9	17841.2	12694.5	15019.4	70.969	14	2010.51	20	123552	7
P52272	Heterogeneous nuclear ribonucleoprotein M OS=Homo sapiens GN=HNRNPM PE=1 SV=3	77.464	18445.1	10167	7310	8134.1	24452.4	14250.8	8472.1	9372.6	46.068	20	3260.6	46	100604	8
P13639	Elongation factor 2 OS=Homo sapiens GN=EEF2 PE=1 SV=4	95.277	10315.7	9402.1	10265	13756.6	15230.2	13711.8	11898.7	14478.1	29.303	0	2654.45	46	99058.2	9
P11142	Heat shock cognate 71 kDa protein OS=Homo sapiens GN=HSPA8 PE=1 SV=1	70.854	13246.1	9095.8	9160.9	13074.7	16054.9	12399.2	9672.1	13103.3	169.125	5	3687.23	35	95807	10
P36578	60S ribosomal protein L4 OS=Homo sapiens GN=RPL4 PE=1 SV=5	47.667	13753.6	9305.3	7020.1	8010.7	20141.4	13338.7	8405.4	10104.2	67.129	0	2499.12	24	90079.4	11
P23396	40S ribosomal protein S3 OS=Homo sapiens GN=RPS3 PE=1 SV=2	26.671	12339.1	9209.8	7565.7	8598.6	18937.4	12855.7	8640.3	9984.5	205.914	0	2139.48	19	88131.1	12
H3BLZ8	Probable ATP-dependent RNA helicase DDX17 OS=Homo sapiens GN=DDX17 PE=1 SV=1	80.389	14170.1	8175.8	5853.5	6385.2	22832.4	12316.7	6357.3	6910.9	69.795	9	2872.83	35	83001.9	13
P15880	40S ribosomal protein S2 OS=Homo sapiens GN=RPS2 PE=1 SV=2	31.305	10947.6	8342.6	6958.1	8247.5	16837.5	11982.5	7994.6	9683.5	42.288	0	2566.28	18	80993.9	14
P19338	Nucleolin OS=Homo sapiens GN=NCL PE=1 SV=3	76.568	13059.4	7984	6114.2	7134.3	16777.1	11458.9	7496.5	9979.8	12.991	0	1906.53	36	80004.2	15
P68363	Tubulin alpha-1B chain OS=Homo sapiens GN=TUBA1B PE=1 SV=1	50.12	12030.2	8264.1	6697	7601.2	16812.2	10737.7	5508.7	7357.1	6811.92	5	11951.3	24	75008.2	16
P39023	60S ribosomal protein L3 OS=Homo sapiens GN=RPL3 PE=1 SV=2	46.08	10820.1	8012.2	6050.6	6633.2	17109.4	10785	6659	8299.9	186.382	25	1743.25	24	74369.4	17
P04843	Dolichyl-diphosphooligosaccharide--protein glycosyltransferase subunit 1 OS=Homo sapiens GN=RPN1 PE=1 SV=1	68.527	7469.8	7547.7	7998.7	9420.6	9820.1	11004	9065.9	11496	19.753	0	2167.92	31	73822.8	18
P49327	Fatty acid synthase OS=Homo sapiens GN=FASN PE=1 SV=3	273.254	8339.2	7123.3	8358.4	11203.7	10045.2	9449.3	8267.2	9895.8	5.589	0	3219.7	74	72682.1	19
P62701	40S ribosomal protein S4, X isoform OS=Homo sapiens GN=RPS4X PE=1 SV=2	29.579	10018.5	7493.2	5735.2	6585.6	15609.8	10584.5	6859.3	8206.1	99	0	2013.98	17	71092.2	20
Q00325-2	Isoform B of Phosphate carrier protein, mitochondrial OS=Homo sapiens GN=SLC25A3	39.933	9555.6	6502.2	6475.2	8175.9	12688.3	9935.2	7442.6	9041.7	40.596	0	1155.41	15	69816.7	21
P27708	CAD protein OS=Homo sapiens GN=CAD PE=1 SV=3	242.829	9872.5	7531	7483.4	9301.2	11345.7	8465	6394.4	7406.2	5.51	0	2912.02	71	67799.4	22
P63244	Receptor of activated protein C kinase 1 OS=Homo sapiens GN=RACK1 PE=1 SV=3	35.055	9711.5	6626.2	5937.3	6657	13923.7	9637.4	6637.9	7780	80.113	0	2122.65	19	66911	23
Q08211	ATP-dependent RNA helicase A OS=Homo sapiens GN=DHX9 PE=1 SV=4	140.869	10074.3	6915.7	5199	6301.6	14142.9	9542.1	6125.9	7770.6	10.938	0	3773.81	48	66072.1	24
P05388	60S acidic ribosomal protein P0 OS=Homo sapiens GN=RPLP0 PE=1 SV=1	34.252	9604.2	6907.9	5055	5578.6	14858.7	9854.1	6239.4	7817.2	99	0	1825.11	17	65915.1	25
P62424	60S ribosomal protein L7a OS=Homo sapiens GN=RPL7A PE=1 SV=2	29.977	9751.9	6493	5139.4	5686.7	14181.3	9483.5	5918.3	7269.4	734.642	0	2179.55	18	63923.5	26
Q9BQG0-2	Isoform 2 of Myb-binding protein 1A OS=Homo sapiens GN=MYBBP1A	149.274	10453.7	6636.2	4769.1	5720.6	13248.4	8772.1	5761.1	7244.8	7.175	0	2497.66	50	62606	27
P16615	Sarcoplasmic/endoplasmic reticulum calcium ATPase 2 OS=Homo sapiens GN=ATP2A2 PE=1 SV=1	114.683	7325.3	6716.5	6996	9029.1	8192.5	8030.5	7043.9	9023	47.438	0	2891.46	49	62356.8	28
P18124	60S ribosomal protein L7 OS=Homo sapiens GN=RPL7 PE=1 SV=1	29.207	9244	6424.9	4952.7	5594.9	13708.7	9369.7	5993.8	6892.3	85.596	0	1150.48	17	62181	29
P25705	ATP synthase subunit alpha, mitochondrial OS=Homo sapiens GN=ATP5A1 PE=1 SV=1	59.714	7744.5	6072.1	6085.6	7724.1	10939.1	8861.7	6117.4	8082.1	31.622	0	2835.21	26	61626.6	30
A0A0G2JIW1	Heat shock 70 kDa protein 1B OS=Homo sapiens GN=HSPA1B PE=1 SV=1	70.066	9692	6671.8	6485.5	9141.2	9256.7	7414.3	5479.7	7137.3	41.813	8	2700.49	32	61278.5	31
Q99623	Prohibitin-2 OS=Homo sapiens GN=PHB2 PE=1 SV=2	33.276	6745.3	6478.2	6271.4	8170.3	7444	8977.5	7327	9196.4	40.246	0	2114.36	20	60610.1	32
Q02878	60S ribosomal protein L6 OS=Homo sapiens GN=RPL6 PE=1 SV=3	32.708	8898.3	6324.7	4919.8	5487.7	13410.4	8702.2	5613.8	7004	99	0	1400.18	18	60360.9	33
Q96AG4	Leucine-rich repeat-containing protein 59 OS=Homo sapiens GN=LRRC59 PE=1 SV=1	34.909	7844	5283.2	4150	5113.1	14747.4	9440.4	6086.9	7209.7	67.129	0	1391.39	14	59874.7	34
P46781	40S ribosomal protein S9 OS=Homo sapiens GN=RPS9 PE=1 SV=3	22.578	8780.9	6192.6	4835.2	5202.1	13121.8	8778.9	5708.5	6826.6	83.834	0	499.86	17	59446.6	35
P68104	Elongation factor 1-alpha 1 OS=Homo sapiens GN=EEF1A1 PE=1 SV=1	50.109	7434.8	5657.4	5889.1	10060	7982	7538.9	6287.8	8528.3	119.226	0	1644.07	20	59378.3	36
P35232	Prohibitin OS=Homo sapiens GN=PHB PE=1 SV=1	29.786	6571.2	5998	5913.9	7892.5	7292.8	8692.9	7093.2	8917.7	99	0	1804.84	16	58372.2	37
P06748	Nucleophosmin OS=Homo sapiens GN=NPM1 PE=1 SV=2	32.555	7475.8	5345	5473.6	5839.9	11230.3	8024	5945.3	7260.1	315.228	0	1446.85	14	56594	38
P46777	60S ribosomal protein L5 OS=Homo sapiens GN=RPL5 PE=1 SV=3	34.341	8807	5962.3	4334.7	4889.2	12601.2	8220.6	4947.9	6234.4	214.443	0	1719.73	15	55997.3	39
Q9NR30	Nucleolar RNA helicase 2 OS=Homo sapiens GN=DDX21 PE=1 SV=5	87.29	8114.1	5893.2	4904.9	5877.9	9594.4	7592.1	5446.4	6484.3	19.806	1	2012.52	30	53907.3	40
P04844	Dolichyl-diphosphooligosaccharide--protein glycosyltransferase subunit 2 OS=Homo sapiens GN=RPN2 PE=1 SV=3	69.241	5013.9	5324.6	5511.4	6583.7	7021.9	7577.2	6764.4	8873.2	31.819	0	1828.23	20	52670.3	41
P46109	Crk-like protein OS=Homo sapiens GN=CRKL PE=1 SV=1	33.756	5771.9	5080.3	5751.6	8071.8	6722.7	6664.5	5972.5	7686.6	378.269	0	2596.92	19	51721.9	42
P51572-2	Isoform 2 of B-cell receptor-associated protein 31 OS=Homo sapiens GN=BCAP31	34.73	5205.6	6006.1	6150.1	7092.8	5938.5	6940	5857.4	7370.6	32.598	0	911.213	16	50561.1	43
P63173	60S ribosomal protein L38 OS=Homo sapiens GN=RPL38 PE=1 SV=2	8.213	7251.7	5266.2	3994.7	4451.3	10968.9	7416.6	4799.5	6046.1	46414.9	0	525.718	6	50195	44
P78527	DNA-dependent protein kinase catalytic subunit OS=Homo sapiens GN=PRKDC PE=1 SV=3	468.788	6570.2	5378.4	5788.4	7384.2	6921.4	5769.1	4662.9	5496.2	1.666	0	2234.16	94	47970.8	45
P39019	40S ribosomal protein S19 OS=Homo sapiens GN=RPS19 PE=1 SV=2	16.051	6689.8	4809.8	3700.1	4008.4	10650.1	7070.3	4360.4	5263.3	176.828	0	1171.85	12	46552.2	46
P26373	60S ribosomal protein L13 OS=Homo sapiens GN=RPL13 PE=1 SV=4	24.247	6786.4	5033.6	3857.3	4235.3	10401.9	6381	3976	5421	83.834	0	926.201	12	46092.5	47
P53621	Coatomer subunit alpha OS=Homo sapiens GN=COPA PE=1 SV=2	138.258	4684.6	4549.3	5268.9	5599.9	6955.9	6816.7	5541.3	6512.6	6.049	0	1660.14	48	45929.2	48
Q92616	eIF-2-alpha kinase activator GCN1 OS=Homo sapiens GN=GCN1 PE=1 SV=6	292.572	5711.6	4418.8	4553	5821.2	8097.1	6068.5	4453.4	5434.7	3.522	0	2976.03	88	44558.3	49
P08670	Vimentin OS=Homo sapiens GN=VIM PE=1 SV=4	53.619	5346.6	4164.9	4701.9	6166	7151.9	5938.8	4747.6	5782.7	18.684	1	1629.19	24	44000.4	50
P30101	Protein disulfide-isomerase A3 OS=Homo sapiens GN=PDIA3 PE=1 SV=4	56.747	4848.9	4288.3	4308.3	5648.6	6423.7	6251.2	5274.5	6846.8	11.328	4	1141.42	22	43890.3	51
Q7KZF4	Staphylococcal nuclease domain-containing protein 1 OS=Homo sapiens GN=SND1 PE=1 SV=1	101.934	5855.5	4292.8	3751.4	4103.8	9765.7	6628.3	4418	5061.2	9.798	0	2058.52	40	43876.7	52
P05387	60S acidic ribosomal protein P2 OS=Homo sapiens GN=RPLP2 PE=1 SV=1	11.658	6467.5	4452.5	3547.9	3845	9544.2	6467.8	4289.6	5040.8	68128.2	4	2349.5	9	43655.3	53
P62241	40S ribosomal protein S8 OS=Homo sapiens GN=RPS8 PE=1 SV=2	24.19	6363.7	4459.1	3500.3	3866	9512.3	6578.9	4267.3	4983.7	198.526	0	1510.4	10	43531.3	54
P04264	Keratin, type II cytoskeletal 1 OS=Homo sapiens GN=KRT1 PE=1 SV=6	65.999	5915.8	4063.9	5977	5833.2	6963	5065	4747.3	4870.4	10.994	2	1497.2	25	43435.6	55
P62280	40S ribosomal protein S11 OS=Homo sapiens GN=RPS11 PE=1 SV=3	18.419	6464.8	4522.6	3489.6	3971	9459.7	6534.4	4199.7	4694.3	99	0	563.415	10	43336.1	56
P08238	Heat shock protein HSP 90-beta OS=Homo sapiens GN=HSP90AB1 PE=1 SV=4	83.212	4764.4	3734.2	5351.6	7237.2	6139	5667.3	4825.9	5531.1	10.743	13	1538.4	31	43250.7	57
P83731	60S ribosomal protein L24 OS=Homo sapiens GN=RPL24 PE=1 SV=1	17.768	6106.5	4551.6	3559.3	3858.4	9921.4	6234.4	3983.1	4950.5	78.433	0	771.916	9	43165.2	58
P06576	ATP synthase subunit beta, mitochondrial OS=Homo sapiens GN=ATP5B PE=1 SV=3	56.525	5676.4	4642.7	4572.7	4544.7	7889.9	6656.3	3903.1	5046.1	21.638	0	1969.63	19	42931.9	59
P11940	Polyadenylate-binding protein 1 OS=Homo sapiens GN=PABPC1 PE=1 SV=2	70.626	5522.2	4420.7	4164.8	4486.3	7759.3	5984.9	4252	5390.7	8.441	7	1225.1	27	41980.9	60
P39656	Dolichyl-diphosphooligosaccharide--protein glycosyltransferase 48 kDa subunit OS=Homo sapiens GN=DDOST PE=1 SV=4	50.769	4191.5	4320	4412	5438.9	5495.5	6040.7	5280.2	6709.3	12.183	0	1305.71	13	41888.1	61
P27797	Calreticulin OS=Homo sapiens GN=CALR PE=1 SV=1	48.112	4696.3	3673.9	3847	4353.2	7972.9	6451.9	4602.7	5353.3	27.943	0	1106.72	17	40951.2	62
P40429	60S ribosomal protein L13a OS=Homo sapiens GN=RPL13A PE=1 SV=2	23.562	6099.9	4168.5	3183.8	3765.7	8956.9	5980.2	3818.2	4644.2	37.747	0	1051.64	13	40617.4	63
Q99497	Protein deglycase DJ-1 OS=Homo sapiens GN=PARK7 PE=1 SV=2	19.878	4617	3987.5	5261.6	6989.9	4938.4	5051.8	4079.5	5656.9	169.125	0	974.95	15	40582.6	64
P62906	60S ribosomal protein L10a OS=Homo sapiens GN=RPL10A PE=1 SV=2	24.816	5985.6	4245.3	3200.1	3638.3	9024.7	6073.6	3918.2	4479.2	38.811	0	1084.12	10	40565	65
Q15293	Reticulocalbin-1 OS=Homo sapiens GN=RCN1 PE=1 SV=1	38.866	1744.9	3393	4898.6	7544	2448.3	5358	6685.2	8480.7	236.137	0	1740.57	14	40552.7	66
P46779	60S ribosomal protein L28 OS=Homo sapiens GN=RPL28 PE=1 SV=3	15.738	6105.9	4064.7	3010.3	3247.8	8781.4	5674.7	3501.2	4367	99	0	889.716	10	38753	67
P06493	Cyclin-dependent kinase 1 OS=Homo sapiens GN=CDK1 PE=1 SV=3	34.074	5388.1	3952.4	3729.6	4402.7	8115.2	5441.3	3680.8	4034.5	45.416	2	1343.94	18	38744.6	68
O00410-3	Isoform 3 of Importin-5 OS=Homo sapiens GN=IPO5	125.464	4463	3939.9	4361.1	5949.9	5136.7	4913.3	4295.9	5655.4	6.12	3	1977	34	38715.2	69
Q06830	Peroxiredoxin-1 OS=Homo sapiens GN=PRDX1 PE=1 SV=1	22.096	4335.9	3891.6	5357.5	6638.3	4225.8	4557.4	4378.1	5191.7	70.969	3	1068.91	13	38576.3	70
P62750	60S ribosomal protein L23a OS=Homo sapiens GN=RPL23A PE=1 SV=1	17.684	5728.8	4022.2	3016.3	3317.3	8651.3	5824.4	3585.7	4200.9	165.81	0	883.28	12	38346.9	71
P17812	CTP synthase 1 OS=Homo sapiens GN=CTPS1 PE=1 SV=2	66.648	4601.9	3803.3	4216.2	5713.9	5227.2	4963.7	4254.3	5416.1	18.307	1	1408.73	22	38196.6	72
G8JLB6	Heterogeneous nuclear ribonucleoprotein H OS=Homo sapiens GN=HNRNPH1 PE=1 SV=1	51.197	6177.4	3911.9	3111.3	3754.6	8287.2	5320.7	3342.6	4112.7	23.245	8	1975.22	16	38018.4	73
Q8NC51	Plasminogen activator inhibitor 1 RNA-binding protein OS=Homo sapiens GN=SERBP1 PE=1 SV=2	44.938	4598.5	3723.3	3378.2	3838.1	7712.2	5497.1	4024.7	5076.7	22.714	0	1104.2	18	37848.8	74
P14625	Endoplasmin OS=Homo sapiens GN=HSP90B1 PE=1 SV=1	92.411	4362.5	3578.5	4017.7	5631.1	5621.3	5126.5	4071.4	4946.1	7.348	1	1182.99	33	37355.1	75
P53618	Coatomer subunit beta OS=Homo sapiens GN=COPB1 PE=1 SV=3	107.074	4361.2	3747.9	4311.9	4464	6477.6	5317.3	4152.7	4421.6	5.412	0	1094.88	32	37254.2	76
P52597	Heterogeneous nuclear ribonucleoprotein F OS=Homo sapiens GN=HNRNPF PE=1 SV=3	45.643	6144.8	3823.8	3107.5	3763.8	8092.4	5194.9	3337.3	3788.4	26.213	0	2423.53	15	37252.9	77
P32969	60S ribosomal protein L9 OS=Homo sapiens GN=RPL9 PE=1 SV=1	21.85	5154.4	3709	3020.1	3452.4	8471.2	5415.1	3456.5	4306.1	350.119	0	1601.12	9	36984.8	78
P61247	40S ribosomal protein S3a OS=Homo sapiens GN=RPS3A PE=1 SV=2	29.926	5027.2	3727.3	3123.8	3507.1	7886.3	5310.1	3551.6	4325.6	68.519	0	1181.13	19	36459	79
P62829	60S ribosomal protein L23 OS=Homo sapiens GN=RPL23 PE=1 SV=1	14.856	5089.7	3953.4	3070.7	3681.6	7555.7	5287.3	3574.1	4162.8	99	0	1491.32	9	36375.3	80
P23528	Cofilin-1 OS=Homo sapiens GN=CFL1 PE=1 SV=3	18.491	3917.1	3455.3	4271.7	5617.4	4627.2	4528.6	4029.7	5432	260.016	2	660.875	15	35879	81
O43795	Unconventional myosin-Ib OS=Homo sapiens GN=MYO1B PE=1 SV=3	131.902	4616.6	3500	3593.9	4525	6443.9	4806.4	3765.8	4537.1	4.353	0	1000.95	37	35788.7	82
P61313	60S ribosomal protein L15 OS=Homo sapiens GN=RPL15 PE=1 SV=2	24.131	5104.4	3647.3	2954.8	3334.1	7571.1	5269.3	3446.5	4426	50.795	0	842.103	10	35753.5	83
Q00839	Heterogeneous nuclear ribonucleoprotein U OS=Homo sapiens GN=HNRNPU PE=1 SV=6	90.528	5267	3753.3	3075.5	4308.7	6142.9	5176	3537	4352.8	10.078	0	1701.61	26	35613.2	84
P08708	40S ribosomal protein S17 OS=Homo sapiens GN=RPS17 PE=1 SV=2	15.54	4709.6	3574.8	3039.8	3367.9	7830	5283.7	3446.1	4141.3	21543.3	0	1268.45	9	35393.2	85
P62753	40S ribosomal protein S6 OS=Homo sapiens GN=RPS6 PE=1 SV=1	28.663	4821.1	3673.9	2871.7	3175.3	7627.7	5112	3328	4131.9	202.092	0	1473.74	13	34741.6	86
P62081	40S ribosomal protein S7 OS=Homo sapiens GN=RPS7 PE=1 SV=1	22.113	4704.3	3509.6	2867.8	3083	7404.4	5029.5	3310.6	3937.7	283.804	0	923.096	12	33846.9	87
P25398	40S ribosomal protein S12 OS=Homo sapiens GN=RPS12 PE=1 SV=3	14.505	4579.7	3290.3	2825.3	2976.7	7667.7	5134.2	3337.6	3763.7	1388.49	0	1663.82	9	33575.2	88
O95793	Double-stranded RNA-binding protein Staufen homolog 1 OS=Homo sapiens GN=STAU1 PE=1 SV=2	63.143	4936.7	3500	2845.1	3063	7562.5	4868	3085.6	3597.5	10.45	1	897.303	21	33458.4	89
P49207	60S ribosomal protein L34 OS=Homo sapiens GN=RPL34 PE=1 SV=3	13.284	5101.5	3493.7	2632	2839.9	7598.4	4905.8	3029.3	3836.2	67.129	0	610.166	6	33436.8	90
Q86UE4	Protein LYRIC OS=Homo sapiens GN=MTDH PE=1 SV=2	63.799	4636.5	3485.8	2574.5	2948.7	7565.8	5043.2	3228.7	3766.8	45.416	0	1963.7	27	33250	91
J3QQ67	60S ribosomal protein L18 (Fragment) OS=Homo sapiens GN=RPL18 PE=1 SV=1	21.825	4865.9	3394.9	2577.5	2847.7	7059.2	4634.6	3034.9	3753.6	128.155	0	1108.8	8	32168.3	92
P61254	60S ribosomal protein L26 OS=Homo sapiens GN=RPL26 PE=1 SV=1	17.248	4896.2	3412.5	2413.6	2674.2	7288.4	4758.5	2956	3605.8	165.81	8	284.447	11	32005.2	93
P22102	Trifunctional purine biosynthetic protein adenosine-3 OS=Homo sapiens GN=GART PE=1 SV=1	107.699	3868.5	3473.6	4124.2	5668.4	3795.6	3635.6	3248	4127.1	5.31	0	1542.52	36	31941	94
Q02543	60S ribosomal protein L18a OS=Homo sapiens GN=RPL18A PE=1 SV=2	20.749	4729.9	3382.3	2474.2	2775.2	7201.4	4713.2	3031.8	3599.2	60.054	0	921.916	10	31907.2	95
P62269	40S ribosomal protein S18 OS=Homo sapiens GN=RPS18 PE=1 SV=3	17.708	4440.4	3337.3	2674.2	2922	6995.9	4706.4	3074.6	3695.5	45.416	0	553.819	11	31846.3	96
F8W727	60S ribosomal protein L32 OS=Homo sapiens GN=RPL32 PE=1 SV=1	17.951	4618.3	3238.7	2497.4	2887.2	6991.7	4619.9	2917.3	3592.9	45.416	0	530.545	9	31363.4	97
P62937	Peptidyl-prolyl cis-trans isomerase A OS=Homo sapiens GN=PPIA PE=1 SV=2	18.001	3451.4	2978.2	3740.3	5257.8	4002.8	4122.3	3488.2	4249.7	70.969	1	727.691	14	31290.7	98
P10599	Thioredoxin OS=Homo sapiens GN=TXN PE=1 SV=3	11.73	3865.7	2944.9	2616.8	5525.6	4443.5	4330.1	2963.5	4344.5	267.27	0	1059.99	7	31034.6	99
P46782	40S ribosomal protein S5 OS=Homo sapiens GN=RPS5 PE=1 SV=4	22.862	4017.7	3177.4	2636.4	2942.3	6786.3	4540.4	3005.7	3830.2	198.526	0	1406.82	11	30936.4	100
P46778	60S ribosomal protein L21 OS=Homo sapiens GN=RPL21 PE=1 SV=2	18.553	4437.9	3198	2579.3	2927	6794.4	4457.5	2825	3526.3	999	0	594.331	9	30745.4	101
P62277	40S ribosomal protein S13 OS=Homo sapiens GN=RPS13 PE=1 SV=2	17.212	4237.7	3270.8	2632.4	2951.8	6642.5	4386.7	2751.7	3491	22.101	0	464.603	10	30364.6	102
Q12907	Vesicular integral-membrane protein VIP36 OS=Homo sapiens GN=LMAN2 PE=1 SV=1	40.203	4365	5136.4	5784.6	6762.4	2386.8	2131.3	1740.7	1997.4	9	0	779.63	12	30304.6	103
Q8WVM8	Sec1 family domain-containing protein 1 OS=Homo sapiens GN=SCFD1 PE=1 SV=4	72.334	3609.6	3641.5	3970.2	4574.2	3749.8	3841.2	3123.4	3698.3	3.739	0	896.182	16	30208.2	104
Q8IXB1	DnaJ homolog subfamily C member 10 OS=Homo sapiens GN=DNAJC10 PE=1 SV=2	91.021	3336.3	2984.5	2635.5	4687.7	4208.8	4205.8	3206.2	4544.9	8.427	0	1409.22	23	29809.7	105
P27635	60S ribosomal protein L10 OS=Homo sapiens GN=RPL10 PE=1 SV=4	24.588	4388.3	3120.3	2648	2931.7	6297.6	4318.9	2641.7	3233.5	48.239	11	884.098	10	29580	106
P46977	Dolichyl-diphosphooligosaccharide--protein glycosyltransferase subunit STT3A OS=Homo sapiens GN=STT3A PE=1 SV=2	80.477	3085.2	2958	2874.4	3651.6	4125.9	4466.2	3786.1	4611.8	3.642	1	806.555	15	29559.2	107
Q9NVI7-2	Isoform 2 of ATPase family AAA domain-containing protein 3A OS=Homo sapiens GN=ATAD3A	66.177	3420.9	2859.8	3089.3	3910.9	4697.6	3953.6	3308.4	4152.2	9	15	1170.99	32	29392.7	108
P62888	60S ribosomal protein L30 OS=Homo sapiens GN=RPL30 PE=1 SV=2	12.776	4305.6	3062.1	2390.4	2603.7	6467.5	4375.9	2666.1	3284.2	99	1	1138.61	7	29155.5	109
P62258	14-3-3 protein epsilon OS=Homo sapiens GN=YWHAE PE=1 SV=1	29.155	3275.8	2433.5	3406.6	4524.9	4022	3650	3456.3	4358.9	11.915	4	609.66	15	29128	110
O76021	Ribosomal L1 domain-containing protein 1 OS=Homo sapiens GN=RSL1D1 PE=1 SV=3	54.939	4695.8	3177.3	2230.5	2695.3	5897.9	4158.9	2712.2	3436.7	14.571	0	776.195	21	29004.6	111
P62913	60S ribosomal protein L11 OS=Homo sapiens GN=RPL11 PE=1 SV=2	20.24	4097.9	2975.9	2276.7	2619.6	6482	4303.2	2816.9	3410.5	45.416	0	777.229	8	28982.7	112
P46783	40S ribosomal protein S10 OS=Homo sapiens GN=RPS10 PE=1 SV=1	18.886	3872.2	3004.3	2511.7	2795.1	6210.2	4000.9	2743.8	3504.7	33.551	0	881.228	13	28642.9	113
P62805	Histone H4 OS=Homo sapiens GN=HIST1H4A PE=1 SV=2	11.36	3758.3	3281.4	2005.1	5529.4	2882.1	4259.9	2808	3786.4	2153.43	0	808.258	8	28310.6	114
Q9UJS0-2	Isoform 2 of Calcium-binding mitochondrial carrier protein Aralar2 OS=Homo sapiens GN=SLC25A13	74.257	3480.2	2750.4	2695.5	3679.3	4242.4	4192.8	3217.7	3820.5	9	2	1475.54	25	28078.8	115
A0A0C4DG17	40S ribosomal protein SA OS=Homo sapiens GN=RPSA PE=1 SV=1	33.293	3677.9	2868.5	2452.1	2903.5	5797.9	4141.2	2783.3	3386.9	55.234	0	1620.78	14	28011.3	116
P62249	40S ribosomal protein S16 OS=Homo sapiens GN=RPS16 PE=1 SV=2	16.435	3972	2930.6	2344.1	2665	6143.4	3797.4	2495.7	3506	30.623	0	530.735	12	27854.2	117
O14654	Insulin receptor substrate 4 OS=Homo sapiens GN=IRS4 PE=1 SV=1	133.685	4100.3	3152.9	3128.3	3873.9	4702.7	3452.6	2633.9	2747.9	5.397	0	1644.46	34	27792.5	118
P18621-3	Isoform 3 of 60S ribosomal protein L17 OS=Homo sapiens GN=RPL17	26.356	4158.7	2958.4	2144.2	2281	6316.9	4129.3	2569.4	3107.9	10.659	0	629.676	8	27665.8	119
P49755	Transmembrane emp24 domain-containing protein 10 OS=Homo sapiens GN=TMED10 PE=1 SV=2	24.96	4914.6	6075.3	5904	5755.1	1541.6	1219.7	920.2	1094.3	10.938	0	1893.91	6	27424.8	120
P30050	60S ribosomal protein L12 OS=Homo sapiens GN=RPL12 PE=1 SV=1	17.808	3977.4	2766.8	2240.3	2481.9	5983.2	3939.4	2557.1	3135.2	350.119	0	1508.08	10	27081.3	121
Q02978	Mitochondrial 2-oxoglutarate/malate carrier protein OS=Homo sapiens GN=SLC25A11 PE=1 SV=3	34.04	3458.1	2539	2439.1	3256.4	4416	3845.5	2992	3850.5	14.505	0	970.064	14	26796.6	122
P62917	60S ribosomal protein L8 OS=Homo sapiens GN=RPL8 PE=1 SV=2	28.007	3906.8	2750.8	2059.9	2308.2	6125.3	3984.6	2518.1	3109.6	25.827	0	863.826	12	26763.3	123
P07355-2	Isoform 2 of Annexin A2 OS=Homo sapiens GN=ANXA2	40.386	2238.2	2504.5	3311.1	5159.6	2665.2	3215.9	3604.9	3855.6	9	0	747.256	19	26555	124
Q15365	Poly(rC)-binding protein 1 OS=Homo sapiens GN=PCBP1 PE=1 SV=2	37.474	3033.9	2635	2946	4048.1	3532.2	3459.7	2996.6	3836.6	14.505	7	1090.75	14	26488.1	125
Q14165	Malectin OS=Homo sapiens GN=MLEC PE=1 SV=1	32.214	2733.1	2746.8	2830.7	3465.2	3423.6	3752.7	3133.7	4184.5	16.783	0	765.156	15	26270.3	126
O15260	Surfeit locus protein 4 OS=Homo sapiens GN=SURF4 PE=1 SV=3	30.374	2338.2	2682.9	3095.4	3856.9	3166.5	3469.9	3297.9	3878.1	67.129	0	1272.9	7	25785.8	127
Q53GQ0	Very-long-chain 3-oxoacyl-CoA reductase OS=Homo sapiens GN=HSD17B12 PE=1 SV=2	34.302	3343.6	2693.8	2455.5	3121.1	4525.7	3408.4	2566.1	3267.6	24.809	0	1012.63	13	25381.8	128
O75947	ATP synthase subunit d, mitochondrial OS=Homo sapiens GN=ATP5H PE=1 SV=3	18.479	3112.2	2234.7	2260.8	3022.6	4469.6	3708.5	2565.8	3520.2	80.113	0	560.875	14	24894.4	129
Q92945	Far upstream element-binding protein 2 OS=Homo sapiens GN=KHSRP PE=1 SV=4	73.07	2810.5	2467.7	2792.8	3908.6	3268.5	3163.2	2851.1	3573.8	5.813	1	1400.35	21	24836.2	130
P05787-2	Isoform 2 of Keratin, type II cytoskeletal 8 OS=Homo sapiens GN=KRT8	56.573	3372.3	2251.3	2428.9	3067.8	5105.9	3375.1	2410.9	2719.5	8.363	3	810.049	25	24731.7	131
U3KQK0	Histone H2B OS=Homo sapiens GN=HIST1H2BN PE=1 SV=1	18.792	3288.1	3267.7	1714.4	4245.4	2695	4214.7	2221.2	2903.6	9	4	691.993	8	24550.1	132
P60709	Actin, cytoplasmic 1 OS=Homo sapiens GN=ACTB PE=1 SV=1	41.71	2536.6	2225.6	2900.8	4045.2	3338	3436.8	2715.5	3156.2	13.925	12	1085.64	14	24354.7	133
Q08J23	tRNA (cytosine(34)-C(5))-methyltransferase OS=Homo sapiens GN=NSUN2 PE=1 SV=2	86.416	3405.8	2351.2	2196.6	2500.8	4856.1	3535.3	2459.1	2861.6	5.494	0	1121.9	27	24166.5	134
P61353	60S ribosomal protein L27 OS=Homo sapiens GN=RPL27 PE=1 SV=2	15.788	3628.3	2658.7	1946.3	2183.8	5452.7	3362.4	2105.8	2708.6	999	0	495.071	9	24046.6	135
Q16531	DNA damage-binding protein 1 OS=Homo sapiens GN=DDB1 PE=1 SV=1	126.887	3408.8	2514.4	2396.8	2852.4	4237.5	3223.8	2427.4	2831.5	2.609	0	626.776	28	23892.6	136
P68371	Tubulin beta-4B chain OS=Homo sapiens GN=TUBB4B PE=1 SV=1	49.799	3700	2406.9	2086.5	2491.7	5338.8	3340.6	2040.2	2176.2	6699.19	5	8170.83	23	23580.9	137
Q14257-2	Isoform 2 of Reticulocalbin-2 OS=Homo sapiens GN=RCN2	39.115	2016.8	2252.7	2202	3537.4	2599.7	2492.5	2970.9	5371.3	27.184	0	1336.89	15	23443.3	138
P62847-4	Isoform 4 of 40S ribosomal protein S24 OS=Homo sapiens GN=RPS24	32.41	3430.9	2462.6	1998.6	2239.3	4928.4	3346.5	2210.3	2799.6	12.895	0	631.556	6	23416.2	139
P62851	40S ribosomal protein S25 OS=Homo sapiens GN=RPS25 PE=1 SV=1	13.734	3252.7	2383	1932.1	2095.7	5117.9	3540.7	2358.8	2697.1	99	0	441.761	5	23378	140
P12236	ADP/ATP translocase 3 OS=Homo sapiens GN=SLC25A6 PE=1 SV=4	32.845	3167.4	2344.9	2174.5	2781.8	4142.5	3249.5	2468	2885.9	47.064	4	1653.35	20	23214.5	141
Q9BVK6	Transmembrane emp24 domain-containing protein 9 OS=Homo sapiens GN=TMED9 PE=1 SV=2	27.26	3165.2	3760.3	3848.2	3903.6	2203.1	2265.9	1900.2	2151.4	22.714	3	833.907	12	23197.9	142
Q9NZI8	Insulin-like growth factor 2 mRNA-binding protein 1 OS=Homo sapiens GN=IGF2BP1 PE=1 SV=2	63.441	3625.9	2395.3	2002.9	2299.9	4713.1	3320.2	2111	2663.1	5.813	1	1034.04	20	23131.4	143
P09661	U2 small nuclear ribonucleoprotein A' OS=Homo sapiens GN=SNRPA1 PE=1 SV=2	28.398	2304.9	2326.9	2742.5	3570.5	3093.7	3095.4	2565.8	3214	45.416	0	737.241	16	22913.7	144
P28288	ATP-binding cassette sub-family D member 3 OS=Homo sapiens GN=ABCD3 PE=1 SV=1	75.428	2619	2177.2	2217.7	3034.2	3286.3	3088.1	2602.5	3520.9	2.001	1	634.014	16	22545.9	145
O15371	Eukaryotic translation initiation factor 3 subunit D OS=Homo sapiens GN=EIF3D PE=1 SV=1	63.932	3651.5	2347.6	1769.6	1970.5	5528.3	3208.2	1916.1	2016	10.86	0	1212.02	15	22407.8	146
P50402	Emerin OS=Homo sapiens GN=EMD PE=1 SV=1	28.976	2941.3	2341.4	2119.9	2365.2	4443.5	3276.4	2295.1	2524	33.145	0	1118.98	13	22306.8	147
P18031	Tyrosine-protein phosphatase non-receptor type 1 OS=Homo sapiens GN=PTPN1 PE=1 SV=1	49.935	2395.5	2387	2462.5	3060.8	2763.4	3144.8	2591	3195.4	5.898	0	508.055	18	22000.4	148
Q53H12	Acylglycerol kinase, mitochondrial OS=Homo sapiens GN=AGK PE=1 SV=2	47.107	2647.5	2087.4	2033.5	2677.7	4140.7	3060.6	2400.8	2726.8	12.335	0	1003.52	17	21775	149
Q9BUF5	Tubulin beta-6 chain OS=Homo sapiens GN=TUBB6 PE=1 SV=1	49.825	2971.8	2221.3	2015.1	2289	4899.5	3063.4	2029.5	2167.6	89.852	1	3474.5	18	21657.2	150
Q96DZ1	Endoplasmic reticulum lectin 1 OS=Homo sapiens GN=ERLEC1 PE=1 SV=1	54.823	2767.2	2453.9	2172.6	2338.1	3214.4	3284.7	2677.6	2668.9	4.946	0	518.631	19	21577.4	151
Q12906-7	Isoform 7 of Interleukin enhancer-binding factor 3 OS=Homo sapiens GN=ILF3	95.748	2968.8	2189.1	1823.5	2588.9	3943.2	2892.3	2070.2	3022	4.217	3	688.498	23	21498	152
Q9HAV4	Exportin-5 OS=Homo sapiens GN=XPO5 PE=1 SV=1	136.222	2556.3	2165.2	2452.1	3372.8	2880.3	2759.1	2339.3	2955.1	1.462	0	555.484	25	21480.2	153
P54136	Arginine--tRNA ligase, cytoplasmic OS=Homo sapiens GN=RARS PE=1 SV=2	75.331	2398.7	1992.1	2399.8	3215.4	3162.7	2746.5	2390.9	3091.9	5.176	0	849.094	29	21398	154
Q7L2E3-2	Isoform 2 of Putative ATP-dependent RNA helicase DHX30 OS=Homo sapiens GN=DHX30	136.03	2941.8	2234.4	1990.3	2332.5	4084	2990	2121.5	2547.9	1.834	0	743.461	32	21242.4	155
P16402	Histone H1.3 OS=Homo sapiens GN=HIST1H1D PE=1 SV=2	22.336	3012	2990.8	1332.6	3472.9	2716	3271.6	1726.5	2710.2	19.309	7	779.156	12	21232.6	156
P50914	60S ribosomal protein L14 OS=Homo sapiens GN=RPL14 PE=1 SV=4	23.417	3261.7	2204.9	1721.5	1856.2	4756.1	3092.8	1944.3	2284.2	11.115	0	592.329	7	21121.7	157
Q9P0L0	Vesicle-associated membrane protein-associated protein A OS=Homo sapiens GN=VAPA PE=1 SV=3	27.875	2460.1	2496.1	2415.4	2863.4	2798.7	2852.2	2331.7	2833.7	14.849	1	431.02	12	21051.3	158
P00367	Glutamate dehydrogenase 1, mitochondrial OS=Homo sapiens GN=GLUD1 PE=1 SV=2	61.359	3666.4	2232.6	1868.7	2158	4580.6	2839	1555.9	1785.6	4.995	0	710.818	18	20686.8	159
P07814	Bifunctional glutamate/proline--tRNA ligase OS=Homo sapiens GN=EPRS PE=1 SV=5	170.483	2370.5	1925.4	2327.3	2944.7	3080.4	2862.5	2357.2	2795.5	1.208	1	644.394	31	20663.5	160
P13645	Keratin, type I cytoskeletal 10 OS=Homo sapiens GN=KRT10 PE=1 SV=6	58.792	2713.8	2090.9	3160.7	2584.7	3515.5	1841.4	2320	2422	6.814	1	792.504	20	20649	161
P07910-2	Isoform C1 of Heterogeneous nuclear ribonucleoproteins C1/C2 OS=Homo sapiens GN=HNRNPC	32.318	2642.8	2485.7	1782.4	3509.7	2519.1	2948.1	1961.4	2748.7	9	0	607.977	14	20597.9	162
O43143	Pre-mRNA-splicing factor ATP-dependent RNA helicase DHX15 OS=Homo sapiens GN=DHX15 PE=1 SV=2	90.875	2575.5	2098.2	2098.3	2832.7	3183.2	2771	2205.8	2829.5	2.981	0	371.339	20	20594.2	163
Q9NRG9	Aladin OS=Homo sapiens GN=AAAS PE=1 SV=1	59.536	3058.2	2294.6	1999.5	2298.1	3803.1	2819.6	1926.4	2238.2	5.898	0	1040.05	18	20437.7	164
P18077	60S ribosomal protein L35a OS=Homo sapiens GN=RPL35A PE=1 SV=2	12.53	3207.4	2207.2	1573.6	1722.3	4655.8	2965.4	1824.9	2268.3	99	0	225.81	8	20424.9	165
Q9NX58	Cell growth-regulating nucleolar protein OS=Homo sapiens GN=LYAR PE=1 SV=2	43.588	3223.8	2170.3	1409.6	1615.1	5123.6	3016.8	1753.3	2031.7	14.505	0	786.09	17	20344.2	166
Q9NZ01	Very-long-chain enoyl-CoA reductase OS=Homo sapiens GN=TECR PE=1 SV=1	36.011	2508.2	2295.5	2203.2	2571.6	3096.4	2741.5	2111.2	2789.6	9	0	458.371	10	20317.2	167
P22626	Heterogeneous nuclear ribonucleoproteins A2/B1 OS=Homo sapiens GN=HNRNPA2B1 PE=1 SV=2	37.407	2687.5	2320.9	1623.9	3033.5	2894.1	3142.1	2023.6	2539.3	15.238	1	890.36	14	20264.9	168
Q14739	Lamin-B receptor OS=Homo sapiens GN=LBR PE=1 SV=2	70.658	2136.5	2206.8	2147.4	2683.1	2522.4	2890.8	2426.5	3182.8	4.179	0	568.48	11	20196.3	169
A0A0D9SF53	ATP-dependent RNA helicase DDX3X OS=Homo sapiens GN=DDX3X PE=1 SV=1	81.426	2764.4	1967.3	1851.8	2446.8	4138.9	2735.4	1879.1	2339.7	5.086	0	933.231	26	20123.4	170
P22087	rRNA 2'-O-methyltransferase fibrillarin OS=Homo sapiens GN=FBL PE=1 SV=2	33.763	3156.8	2226.8	1609	2129.7	3742.3	2979.9	1916.5	2324.1	5.7	0	462.965	13	20085.1	171
P62244	40S ribosomal protein S15a OS=Homo sapiens GN=RPS15A PE=1 SV=2	14.83	2909.4	2056.7	1667.1	1867.1	4322.9	2988	1897.9	2323.2	27.48	4	630.817	9	20032.3	172
P49257	Protein ERGIC-53 OS=Homo sapiens GN=LMAN1 PE=1 SV=2	57.513	2114.5	2488.6	2830.8	3169.8	2308.2	2476.3	2118.4	2447.1	4.298	1	672.654	15	19953.7	173
Q12905	Interleukin enhancer-binding factor 2 OS=Homo sapiens GN=ILF2 PE=1 SV=2	43.035	2747.5	2119.1	1773	2259	3650.3	2826.4	2055.7	2502.5	12.895	0	745.13	13	19933.5	174
P13667	Protein disulfide-isomerase A4 OS=Homo sapiens GN=PDIA4 PE=1 SV=2	72.887	2170.7	1816.1	2009.2	2837	2826.3	2685.2	2269.1	3148.6	3.062	0	722.407	22	19762.2	175
Q15084-2	Isoform 2 of Protein disulfide-isomerase A6 OS=Homo sapiens GN=PDIA6	53.867	2060.7	1715.4	2091.3	2965.2	2393.9	2542.4	2344.9	3629.7	5.629	0	1084.52	12	19743.5	176
P62899	60S ribosomal protein L31 OS=Homo sapiens GN=RPL31 PE=1 SV=1	14.454	2706.5	2088.8	1570.1	1705.2	4492.5	2948.1	1849.6	2354.7	137.95	0	532.512	7	19715.5	177
P68431	Histone H3.1 OS=Homo sapiens GN=HIST1H3A PE=1 SV=2	15.394	2648.2	2405.1	1396.4	3827.4	2037.9	3049	1941.9	2358.8	6.197	3	246.74	4	19664.7	178
P60842	Eukaryotic initiation factor 4A-I OS=Homo sapiens GN=EIF4A1 PE=1 SV=1	46.125	2420.4	1913.2	2126.6	2644.3	3385.2	2692	2043.9	2201.1	3.642	3	394.559	14	19426.7	179
P22695	Cytochrome b-c1 complex subunit 2, mitochondrial OS=Homo sapiens GN=UQCRC2 PE=1 SV=3	48.413	2358.3	1871.5	1769	2294.7	3067.4	3022.6	2140.9	2839.5	9	0	1015.96	15	19363.9	180
P46821	Microtubule-associated protein 1B OS=Homo sapiens GN=MAP1B PE=1 SV=2	270.468	2656.8	1927.4	2127.2	2559.3	3441.1	2540.5	1951.6	2117.4	1.049	0	1226.75	30	19321.3	181
P05386	60S acidic ribosomal protein P1 OS=Homo sapiens GN=RPLP1 PE=1 SV=1	11.507	2786.5	1870.9	1417.5	1456.9	4624.3	3030.1	1933.2	2164	157.489	0	1195.61	4	19283.4	182
O00483	Cytochrome c oxidase subunit NDUFA4 OS=Homo sapiens GN=NDUFA4 PE=1 SV=1	9.364	2813.8	1799.9	1702	2241.5	3502.9	2727.9	2027.6	2439.4	30.623	0	275.693	4	19255	183
B4DR61	Protein transport protein Sec61 subunit alpha isoform 1 OS=Homo sapiens GN=SEC61A1 PE=1 SV=1	52.915	2250.3	1947.9	1667.8	1943.5	3459.6	2990	2215.6	2767.5	4.78	6	528.74	11	19242.2	184
Q96S52	GPI transamidase component PIG-S OS=Homo sapiens GN=PIGS PE=1 SV=3	61.617	2028.6	2112.1	2164.7	2601.6	2638	2753.7	2181.5	2713	6.814	0	717.636	17	19193.2	185
P11586	C-1-tetrahydrofolate synthase, cytoplasmic OS=Homo sapiens GN=MTHFD1 PE=1 SV=3	101.495	2342.9	1883.8	2090.4	2933.7	2682.1	2435.6	1988.4	2699.7	4.012	0	730.974	34	19056.6	186
Q9P035	Very-long-chain (3R)-3-hydroxyacyl-CoA dehydratase 3 OS=Homo sapiens GN=HACD3 PE=1 SV=2	43.132	2239.2	1939.3	2115	2515.9	2942	2604.8	2087.3	2485	6.743	0	665.915	9	18928.5	187
Q9P258	Protein RCC2 OS=Homo sapiens GN=RCC2 PE=1 SV=2	56.049	2121.7	1938.1	2226.1	2961	2386.3	2394.5	2080.2	2670.8	5.225	0	689.76	19	18778.7	188
O75396	Vesicle-trafficking protein SEC22b OS=Homo sapiens GN=SEC22B PE=1 SV=4	24.578	2085	2064.8	2105.5	2483.5	2709.1	2720.5	2107.3	2445.8	10.788	0	648.56	8	18721.5	189
O60506	Heterogeneous nuclear ribonucleoprotein Q OS=Homo sapiens GN=SYNCRIP PE=1 SV=2	69.56	2485.3	1889.8	1759	2424.5	3207.8	2657.7	1887.4	2219.6	5.31	0	924.056	22	18531.1	190
K7ELC2	40S ribosomal protein S15 OS=Homo sapiens GN=RPS15 PE=1 SV=1	17.712	2646.9	1899.9	1532.3	1655.4	4186.7	2750.2	1788.8	1995.7	36.276	0	340.43	5	18455.9	191
P46776	60S ribosomal protein L27a OS=Homo sapiens GN=RPL27A PE=1 SV=2	16.551	2839	1857.1	1490.7	1671	3950.7	2696	1753.9	2172	99	0	800.135	7	18430.4	192
P42766	60S ribosomal protein L35 OS=Homo sapiens GN=RPL35 PE=1 SV=2	14.543	2880.3	1880.2	1381.7	1517.8	4160.6	2754	1671.5	2046.8	67.129	0	300.385	6	18292.9	193
Q9UBS4	DnaJ homolog subfamily B member 11 OS=Homo sapiens GN=DNAJB11 PE=1 SV=1	40.489	2189.8	1721	1718.2	2234.8	3018.7	2611.2	2049.2	2526.6	11.328	0	657.085	15	18069.5	194
Q9Y3I0	tRNA-splicing ligase RtcB homolog OS=Homo sapiens GN=RTCB PE=1 SV=1	55.175	2593.4	1778.9	1603.8	1925.8	3866.1	2677.3	1737.8	1881.9	2.981	0	558.265	14	18065	195
P62266	40S ribosomal protein S23 OS=Homo sapiens GN=RPS23 PE=1 SV=3	15.798	2669.5	1904.3	1402.3	1555	3996.4	2712.2	1659.8	2141.3	41.17	0	588.704	7	18040.8	196
P31689	DnaJ homolog subfamily A member 1 OS=Homo sapiens GN=DNAJA1 PE=1 SV=2	44.839	2539	1912.7	1770.7	2062.6	3333.4	2544.4	1773.2	2041.6	8.006	0	554.542	17	17977.6	197
Q9NSD9	Phenylalanine--tRNA ligase beta subunit OS=Homo sapiens GN=FARSB PE=1 SV=3	66.074	2175.8	1831.2	1989.1	2628.7	2492.9	2322	1979.4	2447	2.942	0	616.373	21	17866.1	198
Q9BTX1	Nucleoporin NDC1 OS=Homo sapiens GN=NDC1 PE=1 SV=2	76.255	2764.6	2035.2	1793.4	2073.5	3216.2	2420.2	1581.8	1960.3	13.065	0	1300.2	17	17845.2	199
P61927	60S ribosomal protein L37 OS=Homo sapiens GN=RPL37 PE=1 SV=2	11.071	2790.3	1942.2	1401.4	1443.1	4250	2472.5	1433.5	2112.1	9	0	58.75	5	17845.1	200
P25205	DNA replication licensing factor MCM3 OS=Homo sapiens GN=MCM3 PE=1 SV=3	90.924	2173.9	1856.9	1905.7	2533.3	2532.1	2331.6	1943	2445.9	2.227	0	805.58	25	17722.4	201
Q99729-3	Isoform 3 of Heterogeneous nuclear ribonucleoprotein A/B OS=Homo sapiens GN=HNRNPAB	30.569	2389	1810.2	1434.7	2428.4	2813.4	2563	1745.2	2527.7	10.788	1	555.099	10	17711.6	202
Q14152	Eukaryotic translation initiation factor 3 subunit A OS=Homo sapiens GN=EIF3A PE=1 SV=1	166.468	2191.2	1720.6	2020.4	2357	3114.2	2446.7	1738.2	2121.1	0.891	0	404.844	23	17709.4	203
P02786	Transferrin receptor protein 1 OS=Homo sapiens GN=TFRC PE=1 SV=2	84.818	2009.8	1987.1	2068.3	2497.1	2537.7	2462.2	1812.6	2267.6	1.7	0	632.62	17	17642.4	204
J3KTA4	Probable ATP-dependent RNA helicase DDX5 OS=Homo sapiens GN=DDX5 PE=1 SV=1	69.044	3280	1847	1274.8	1539.4	4315	2371.8	1378	1621.2	22.52	0	1293.22	27	17627.2	205
P05023	Sodium/potassium-transporting ATPase subunit alpha-1 OS=Homo sapiens GN=ATP1A1 PE=1 SV=1	112.824	1992.9	1815.6	2092.8	2576.1	2380.6	2365	1909	2416	3.125	0	1001.35	25	17548	206
P84098	60S ribosomal protein L19 OS=Homo sapiens GN=RPL19 PE=1 SV=1	23.451	2505.3	1851.4	1449.3	1763.1	3799.1	2630	1542.3	1952.4	26.826	0	704.734	6	17492.9	207
Q3ZCQ8-2	Isoform 2 of Mitochondrial import inner membrane translocase subunit TIM50 OS=Homo sapiens GN=TIMM50	50.433	2628.5	1813.8	1647	2008.7	3350.7	2388.5	1564.2	1967.3	4.754	0	635.025	12	17368.7	208
P08195-4	Isoform 4 of 4F2 cell-surface antigen heavy chain OS=Homo sapiens GN=SLC3A2	71.079	1922.7	1869	1936.7	2633.1	2266.9	2271.3	1992	2450.2	3.037	0	537.982	14	17341.9	209
P00492	Hypoxanthine-guanine phosphoribosyltransferase OS=Homo sapiens GN=HPRT1 PE=1 SV=2	24.564	1673.7	1695	2318	2518.2	1982.7	2103.3	2180.7	2620.4	23.245	0	531.131	10	17092	210
O60313-2	Isoform 2 of Dynamin-like 120 kDa protein, mitochondrial OS=Homo sapiens GN=OPA1	115.812	2081.7	1665.7	1856	2512.1	2605.2	2257.4	1894.7	2203.2	2.325	0	881.307	28	17076	211
Q9Y4R8	Telomere length regulation protein TEL2 homolog OS=Homo sapiens GN=TELO2 PE=1 SV=2	91.689	2310.7	1818.3	1794.3	2135.9	3002.8	2277.9	1694.5	1954.2	1.448	0	352.22	18	16988.6	212
Q99832	T-complex protein 1 subunit eta OS=Homo sapiens GN=CCT7 PE=1 SV=2	59.329	2001.8	1623.6	2033.9	2688	2389	2184.5	1834.3	2098.7	3.084	0	709	18	16853.8	213
O95831	Apoptosis-inducing factor 1, mitochondrial OS=Homo sapiens GN=AIFM1 PE=1 SV=1	66.859	2385.3	1513.4	1543.7	2002	3071.1	2293	1861.6	2160.3	3.642	0	623.76	16	16830.4	214
O00159	Unconventional myosin-Ic OS=Homo sapiens GN=MYO1C PE=1 SV=4	121.606	2162.4	1744.1	1603.4	1995.3	2950	2287.7	1810.4	2203.1	2.271	0	763.79	29	16756.4	215
A0A087WV73	Probable 28S rRNA (cytosine(4447)-C(5))-methyltransferase OS=Homo sapiens GN=NOP2 PE=1 SV=1	94.038	2627.6	1846	1413.3	1773.1	3192.6	2277.8	1556.9	1916.8	2.325	0	682.678	17	16604.1	216
Q07021	Complement component 1 Q subcomponent-binding protein, mitochondrial OS=Homo sapiens GN=C1QBP PE=1 SV=1	31.343	1911.6	1696.7	1616	2158.6	2267.5	2304.3	1925.1	2707.3	4.412	0	838.494	5	16587.1	217
Q07065	Cytoskeleton-associated protein 4 OS=Homo sapiens GN=CKAP4 PE=1 SV=2	65.983	1622.6	1469.1	1531.7	1998.1	2518.7	2469.2	2144.3	2765.4	4.036	0	1006.86	25	16519.1	218
Q9Y3U8	60S ribosomal protein L36 OS=Homo sapiens GN=RPL36 PE=1 SV=3	12.246	2457.1	1727.6	1315.1	1552.1	3666.4	2496.1	1615	1682.5	45.416	0	438.813	5	16511.9	219
Q10471	Polypeptide N-acetylgalactosaminyltransferase 2 OS=Homo sapiens GN=GALNT2 PE=1 SV=1	64.691	1614.7	1652.6	1807.1	2161.1	2206.8	2353.7	2088.8	2592	3.084	1	368.428	13	16476.8	220
P10606	Cytochrome c oxidase subunit 5B, mitochondrial OS=Homo sapiens GN=COX5B PE=1 SV=2	13.687	1759.3	1601.5	1513	1970.1	2264.3	2845.3	2079.1	2376.2	9	0	287.9	6	16408.8	221
P11387	DNA topoisomerase 1 OS=Homo sapiens GN=TOP1 PE=1 SV=2	90.669	2414.2	1838.6	1431.7	1983.4	3071.6	2402.3	1380.4	1761.3	2.086	0	340.77	19	16283.5	222
P48444	Coatomer subunit delta OS=Homo sapiens GN=ARCN1 PE=1 SV=1	57.174	1985.1	1639.8	1845.7	1916.2	2816.5	2331.2	1733.7	1990.3	6.943	0	514.2	20	16258.5	223
P14174	Macrophage migration inhibitory factor OS=Homo sapiens GN=MIF PE=1 SV=4	12.468	1860.2	1641.9	1923.4	2420.7	2214.7	2211.3	1775.8	2146.4	1777.28	0	1260.03	5	16194.4	224
Q14974	Importin subunit beta-1 OS=Homo sapiens GN=KPNB1 PE=1 SV=2	97.108	1925.8	1588.2	1810.7	2402.8	2405.4	2034.3	1711.4	2301.8	2.001	0	471.056	19	16180.4	225
Q9UQ80	Proliferation-associated protein 2G4 OS=Homo sapiens GN=PA2G4 PE=1 SV=3	43.759	1941.8	1388	1627.7	1870.2	3591.3	2199.7	1562.1	1911.1	8.12	0	651.594	15	16091.9	226
P20700	Lamin-B1 OS=Homo sapiens GN=LMNB1 PE=1 SV=2	66.368	2656.1	1961.8	1435.4	1841.1	2889.2	2343	1362.2	1574.9	6.444	1	780.803	26	16063.7	227
J3KNL6	Protein transport protein Sec16A OS=Homo sapiens GN=SEC16A PE=1 SV=1	251.738	2106.8	1587.1	1617.9	1887.8	3231.3	2288.1	1569.4	1747.6	1.972	0	810.49	38	16036	228
Q9ULX6	A-kinase anchor protein 8-like OS=Homo sapiens GN=AKAP8L PE=1 SV=3	71.604	2103.7	1648	1889.2	2110.5	2904.8	2087.6	1609.9	1677.4	6.356	0	707.09	18	16031.1	229
P61513	60S ribosomal protein L37a OS=Homo sapiens GN=RPL37A PE=1 SV=2	10.268	2276.1	1649.5	1315	1557	3541.3	2314.6	1521	1853.9	45.416	0	858.869	4	16028.4	230
Q14204	Cytoplasmic dynein 1 heavy chain 1 OS=Homo sapiens GN=DYNC1H1 PE=1 SV=5	532.072	1985.7	1568.8	1791	2235.5	2593.9	2144.8	1702.4	1966.1	0.58	0	893.494	57	15988.2	231
Q9BSJ8-2	Isoform 2 of Extended synaptotagmin-1 OS=Homo sapiens GN=ESYT1	123.925	1851.1	1651.1	1757.4	2153.4	2417.7	2228.9	1764.3	2103.2	1.921	1	830.949	21	15927.1	232
Q92598	Heat shock protein 105 kDa OS=Homo sapiens GN=HSPH1 PE=1 SV=1	96.804	2022.3	1462.5	1444.4	2040	2679.5	2208.3	1746.6	2221.6	2.035	1	575.794	22	15825.2	233
P41252	Isoleucine--tRNA ligase, cytoplasmic OS=Homo sapiens GN=IARS PE=1 SV=2	144.406	1857.5	1530.4	1738.1	2208.1	2411.8	2076.9	1715.5	2019.2	1.412	0	511.82	24	15557.5	234
O75844	CAAX prenyl protease 1 homolog OS=Homo sapiens GN=ZMPSTE24 PE=1 SV=2	54.778	1748.4	1706.1	1790.6	2212.6	1922.3	2063	1765.6	2329	10.053	0	652.145	13	15537.6	235
Q9UJZ1	Stomatin-like protein 2, mitochondrial OS=Homo sapiens GN=STOML2 PE=1 SV=1	38.51	1691.9	1711.5	1726	2178.7	2048.9	2069.7	1724.9	2292.1	11.589	0	824.465	14	15443.7	236
Q8N766	ER membrane protein complex subunit 1 OS=Homo sapiens GN=EMC1 PE=1 SV=1	111.689	1715.6	1567.7	1639	2128.4	2132.3	2089.2	1804	2291.6	1.745	0	645.79	19	15367.8	237
P42166	Lamina-associated polypeptide 2, isoform alpha OS=Homo sapiens GN=TMPO PE=1 SV=2	75.446	1874.3	1536.2	1636.6	2155.6	2184	2024.7	1645	2198	3.217	6	590.468	21	15254.4	238
Q8TCT9	Minor histocompatibility antigen H13 OS=Homo sapiens GN=HM13 PE=1 SV=1	41.462	1441.7	1520.6	1719.1	2205.7	1771.1	2125.8	1966.2	2502.6	6.499	0	316.094	8	15252.8	239
P56192	Methionine--tRNA ligase, cytoplasmic OS=Homo sapiens GN=MARS PE=1 SV=2	101.052	2022.1	1538.5	1672.1	2073.5	2436.1	1994.9	1599.4	1892.5	3.062	0	543.3	21	15229.1	240
P14618	Pyruvate kinase PKM OS=Homo sapiens GN=PKM PE=1 SV=4	57.9	1428.5	1131.3	1805.9	2982.3	2004.5	2066.5	1777.9	1995.8	3.184	0	639.235	18	15192.7	241
P35606	Coatomer subunit beta' OS=Homo sapiens GN=COPB2 PE=1 SV=2	102.422	1590.2	1511.6	1748	1766	2367	2253.8	1843.2	2095	2.295	0	689.365	21	15174.8	242
O75489	NADH dehydrogenase [ubiquinone] iron-sulfur protein 3, mitochondrial OS=Homo sapiens GN=NDUFS3 PE=1 SV=1	30.223	1810.5	1483.7	1483.4	1881.6	2295.6	2358	1742.2	2119.6	6.079	0	475.84	12	15174.6	243
Q15366-3	Isoform 3 of Poly(rC)-binding protein 2 OS=Homo sapiens GN=PCBP2	38.197	1686.2	1447.6	1640.7	2342.3	1999.1	1943.6	1766.7	2239.6	13.125	5	939.744	13	15065.8	244
Q92643	GPI-anchor transamidase OS=Homo sapiens GN=PIGK PE=1 SV=2	45.223	1535.8	1611.8	1585.5	2080.6	2023.5	2120.1	1715.3	2205	3.786	0	469.984	11	14877.6	245
P52701	DNA mismatch repair protein Msh6 OS=Homo sapiens GN=MSH6 PE=1 SV=2	152.689	2051.8	1526.6	1579.1	1864.5	2653.9	1985.7	1453	1745.6	1.818	0	799.202	31	14860.2	246
P48047	ATP synthase subunit O, mitochondrial OS=Homo sapiens GN=ATP5O PE=1 SV=1	23.263	1779.4	1417.4	1444.8	1933.7	2503.9	2135.7	1586.3	2033.4	15.379	0	700.88	7	14834.6	247
Q92621	Nuclear pore complex protein Nup205 OS=Homo sapiens GN=NUP205 PE=1 SV=3	227.776	2103.4	1576.6	1486.1	1683.6	2801.1	2039.8	1457.6	1670.8	0.66	0	372.72	24	14819	248
O14967	Calmegin OS=Homo sapiens GN=CLGN PE=1 SV=1	69.994	1949.1	1538.8	1296.4	1506	2800.3	2126.1	1449.8	2047.8	4.52	0	317.68	19	14714.3	249
Q15363	Transmembrane emp24 domain-containing protein 2 OS=Homo sapiens GN=TMED2 PE=1 SV=1	22.746	2463.9	3188.3	2594.9	2650.6	1061.5	980.7	797.7	970.5	30.623	0	748.459	5	14708.1	250
H7BY58	Protein-L-isoaspartate O-methyltransferase OS=Homo sapiens GN=PCMT1 PE=1 SV=1	30.339	1548.3	1392.2	1763.5	2293.4	1880.6	1902.6	1653.2	2151.5	6.627	0	431.484	11	14585.3	251
Q13310-3	Isoform 3 of Polyadenylate-binding protein 4 OS=Homo sapiens GN=PABPC4	72.345	1867.5	1533.2	1526	1698.3	2756.7	1983.6	1433.5	1771.2	6.602	0	1185.24	23	14570	252
A0A087WVQ6	Clathrin heavy chain OS=Homo sapiens GN=CLTC PE=1 SV=1	191.936	1633.1	1273.7	1648.2	2173.5	2097.8	1976.8	1691.4	2047.4	0.878	0	547.752	25	14541.9	253
Q9UBF2	Coatomer subunit gamma-2 OS=Homo sapiens GN=COPG2 PE=1 SV=1	97.56	1706.4	1535.2	1625.7	1771.2	2363.2	2003.5	1544.4	1722.3	1.884	2	615.075	19	14271.9	254
O60884	DnaJ homolog subfamily A member 2 OS=Homo sapiens GN=DNAJA2 PE=1 SV=1	45.717	1935.3	1421.6	1364.7	1666.7	2657.7	1940.7	1409.2	1650.4	5.19	0	593.985	12	14046.3	255
Q9Y224	UPF0568 protein C14orf166 OS=Homo sapiens GN=C14orf166 PE=1 SV=1	28.051	1910.7	1360.6	1296.3	1549.9	2871.5	1979.6	1349.7	1646.9	4.275	0	327.537	12	13965.2	256
J3KQN4	60S ribosomal protein L36a OS=Homo sapiens GN=RPL36A PE=3 SV=1	16.368	1983.7	1495.8	1166.1	1269.6	3251.1	2060.3	1241	1383.5	30.623	5	248.046	5	13851.1	257
Q9UBV2	Protein sel-1 homolog 1 OS=Homo sapiens GN=SEL1L PE=1 SV=3	88.698	1724.3	1647.9	1372.7	1427.4	2053.4	2200.4	1642.5	1779.8	2.639	0	750.6	16	13848.4	258
Q9UGP8	Translocation protein SEC63 homolog OS=Homo sapiens GN=SEC63 PE=1 SV=2	87.942	1608.5	1439.2	1418	1783.8	2053.9	2032.9	1613.2	1869.1	2.34	0	575.55	16	13818.6	259
P61978-2	Isoform 2 of Heterogeneous nuclear ribonucleoprotein K OS=Homo sapiens GN=HNRNPK	50.996	1758.9	1385.3	1326.9	1829.9	2338.6	1921	1421.1	1798.6	4.843	0	703.285	17	13780.3	260
Q13438	Protein OS-9 OS=Homo sapiens GN=OS9 PE=1 SV=1	75.515	1702.2	1583.7	1405.3	1501.5	2024.3	2217.6	1673.9	1581	2.793	14	463.373	18	13689.5	261
P15924	Desmoplakin OS=Homo sapiens GN=DSP PE=1 SV=3	331.569	1681.5	1345.4	1492.2	1912.8	2212.3	1805.8	1418.8	1724.2	0.46	0	529.546	33	13593	262
P47756-2	Isoform 2 of F-actin-capping protein subunit beta OS=Homo sapiens GN=CAPZB	30.609	1584.8	1340	1604.3	2099.1	1785.6	1793.5	1533.1	1837.1	4.456	0	347.553	10	13577.5	263
P38646	Stress-70 protein, mitochondrial OS=Homo sapiens GN=HSPA9 PE=1 SV=2	73.635	1973.5	1185	1248.9	2046.2	2175.9	1834	1265	1788.7	3.108	0	682.854	21	13517.2	264
P35268	60S ribosomal protein L22 OS=Homo sapiens GN=RPL22 PE=1 SV=2	14.778	1851.5	1369.1	1115.6	1234.6	3076.5	1951.8	1340.5	1545.6	67.129	0	991.306	5	13485.2	265
Q8TDN6	Ribosome biogenesis protein BRX1 homolog OS=Homo sapiens GN=BRIX1 PE=1 SV=2	41.375	2062	1374.8	1056.7	1381	2755.5	1895.5	1285.3	1650	2.162	0	162.04	7	13460.8	266
P21796	Voltage-dependent anion-selective channel protein 1 OS=Homo sapiens GN=VDAC1 PE=1 SV=2	30.754	1344.4	1322.5	1427.1	1775.4	1827.6	1996.5	1604.3	2137.9	11.915	1	652.362	14	13435.7	267
Q9BZE4	Nucleolar GTP-binding protein 1 OS=Homo sapiens GN=GTPBP4 PE=1 SV=3	73.918	2134.9	1365.9	1110.5	1380.3	2989.3	1845.1	1142.2	1454.1	2.162	0	293.934	18	13422.3	268
F8VW96	Cysteine and glycine-rich protein 2 OS=Homo sapiens GN=CSRP2 PE=1 SV=1	26.719	1738.9	1432.7	1696.4	2239.2	1577.8	1621.9	1395.6	1718.3	10.45	0	688.698	10	13420.8	269
A6NHL2	Tubulin alpha chain-like 3 OS=Homo sapiens GN=TUBAL3 PE=1 SV=2	49.877	1924.9	1521.6	1194.6	1326.1	2826.7	1812.1	1246.4	1543.6	5.422	0	1479.96	6	13396	270
Q92499	ATP-dependent RNA helicase DDX1 OS=Homo sapiens GN=DDX1 PE=1 SV=2	82.38	1857.4	1349.8	1227.1	1473.9	2751.4	1945.1	1332.4	1441	2.942	0	573.68	21	13378.1	271
O75964	ATP synthase subunit g, mitochondrial OS=Homo sapiens GN=ATP5L PE=1 SV=3	11.421	1800.9	1316.4	1265.8	1600.3	2313.7	1937.6	1314.2	1712.6	16.783	0	330.876	5	13261.5	272
Q8TCJ2	Dolichyl-diphosphooligosaccharide--protein glycosyltransferase subunit STT3B OS=Homo sapiens GN=STT3B PE=1 SV=1	93.614	1399.9	1393.9	1581	1773	1739.6	1953.7	1444	1942.6	1.834	0	457.51	12	13227.7	273
P63151	Serine/threonine-protein phosphatase 2A 55 kDa regulatory subunit B alpha isoform OS=Homo sapiens GN=PPP2R2A PE=1 SV=1	51.659	1596.8	1378.5	1630.1	2197.6	1650.7	1579.9	1341.2	1786.9	5.105	0	489.362	18	13161.7	274
P35080	Profilin-2 OS=Homo sapiens GN=PFN2 PE=1 SV=3	15.036	1496.9	1353.7	1594.4	2011.5	1667.3	1712.7	1493.4	1791.1	73.989	6	686.89	8	13121	275
Q5JWF2	Guanine nucleotide-binding protein G(s) subunit alpha isoforms XLas OS=Homo sapiens GN=GNAS PE=1 SV=2	110.956	1638.9	1369.4	1508.5	1949.6	1909.6	1702.1	1418.5	1618.2	0.863	0	355.46	8	13114.8	276
Q96DA6	Mitochondrial import inner membrane translocase subunit TIM14 OS=Homo sapiens GN=DNAJC19 PE=1 SV=3	12.491	1788.2	1385.9	1085.5	1327.9	2629.8	1827.6	1326.4	1687.6	6.943	0	162.636	7	13058.9	277
P48643	T-complex protein 1 subunit epsilon OS=Homo sapiens GN=CCT5 PE=1 SV=1	59.633	1488.2	1184.8	1546.4	1972.8	1868.5	1790.2	1458.7	1715.2	2.36	0	444.336	17	13024.8	278
Q9BVP2	Guanine nucleotide-binding protein-like 3 OS=Homo sapiens GN=GNL3 PE=1 SV=2	61.954	1967.2	1336.4	1086.4	1374.7	2582.1	1864	1262.4	1544	4.623	0	693.287	18	13017.2	279
B0QZ18	Copine-1 OS=Homo sapiens GN=CPNE1 PE=1 SV=1	59.68	1994.4	1325.2	1164.8	1380.6	2676.8	1787.3	1181.9	1484.9	2.162	0	294.338	10	12995.9	280
Q9HD20	Manganese-transporting ATPase 13A1 OS=Homo sapiens GN=ATP13A1 PE=1 SV=2	132.87	1458.5	1396.1	1359.2	1727.5	1860.9	1841.9	1502.5	1832.6	1.209	0	504.38	19	12979.2	281
Q16795	NADH dehydrogenase [ubiquinone] 1 alpha subcomplex subunit 9, mitochondrial OS=Homo sapiens GN=NDUFA9 PE=1 SV=2	42.483	1517.6	1257.1	1243.6	1620.3	1957.2	1977.3	1485.5	1865.2	2.728	0	406.11	12	12923.8	282
P53007	Tricarboxylate transport protein, mitochondrial OS=Homo sapiens GN=SLC25A1 PE=1 SV=2	33.991	1611.7	1258.6	1223.6	1715.5	1993.2	1821.1	1469.1	1788.9	9	0	422.355	10	12881.7	283
Q9P2J5	Leucine--tRNA ligase, cytoplasmic OS=Homo sapiens GN=LARS PE=1 SV=2	134.379	1483.1	1229	1510.2	1845.1	1976.7	1750.3	1466.1	1608.6	1.207	0	681.54	20	12869.1	284
Q9HD45	Transmembrane 9 superfamily member 3 OS=Homo sapiens GN=TM9SF3 PE=1 SV=2	67.843	1708.2	1748.2	1750.2	1947.2	1448.4	1581.7	1211.2	1347.3	3.125	0	325.045	11	12742.4	285
Q9H3K6	BolA-like protein 2 OS=Homo sapiens GN=BOLA2 PE=1 SV=1	10.11	1404.6	1237.7	1419.8	1881	1803.9	1683.1	1446.4	1844.8	50.795	0	470.863	6	12721.3	286
P62979	Ubiquitin-40S ribosomal protein S27a OS=Homo sapiens GN=RPS27A PE=1 SV=2	17.953	1753.7	1329.1	1160.7	1188.7	2516.3	1851.2	1260	1561.7	11.328	4	559.939	6	12621.4	287
H0UI06	Cytochrome c oxidase subunit 7A2, mitochondrial OS=Homo sapiens GN=COX7A2 PE=1 SV=1	12.836	1342	1276.7	1124.7	1437.5	1547	2180.2	1664.7	2044.3	2.162	0	182.9	2	12617.1	288
Q8NBS9	Thioredoxin domain-containing protein 5 OS=Homo sapiens GN=TXNDC5 PE=1 SV=2	47.599	1385.5	1099.6	1392.7	1945	1532.1	1645.4	1566.4	2022.9	4.055	0	432.483	13	12589.6	289
P40939	Trifunctional enzyme subunit alpha, mitochondrial OS=Homo sapiens GN=HADHA PE=1 SV=2	82.947	1627.9	1313.1	1306.1	1533	2093	1806	1272.5	1496.7	1.929	0	562.12	17	12448.3	290
O43175	D-3-phosphoglycerate dehydrogenase OS=Homo sapiens GN=PHGDH PE=1 SV=4	56.614	1395	1230.6	1395.6	1884.7	1732.5	1656.7	1455.9	1661.4	6.667	0	608.536	17	12412.4	291
O75306	NADH dehydrogenase [ubiquinone] iron-sulfur protein 2, mitochondrial OS=Homo sapiens GN=NDUFS2 PE=1 SV=2	52.512	1470.7	1218.8	1239.7	1605.5	1884.2	1834.2	1382.4	1729.1	2.03	0	378.724	9	12364.6	292
Q86Y56	Dynein assembly factor 5, axonemal OS=Homo sapiens GN=DNAAF5 PE=1 SV=4	93.462	1593.9	1301.4	1388.2	1786.6	1871.5	1572.4	1295.8	1521.6	1.7	0	611.333	22	12331.4	293
Q96HS1	Serine/threonine-protein phosphatase PGAM5, mitochondrial OS=Homo sapiens GN=PGAM5 PE=1 SV=2	31.985	1717.1	1191.1	1162.2	1440.8	2242.9	1764.9	1301.5	1430.4	5.952	0	388.469	10	12250.9	294
A8MXP9	Matrin-3 OS=Homo sapiens GN=MATR3 PE=1 SV=1	99.905	1580.8	1249.9	1193.8	1648.9	1959.9	1786.8	1235.1	1524.8	1.649	0	482.328	18	12180	295
O95573	Long-chain-fatty-acid--CoA ligase 3 OS=Homo sapiens GN=ACSL3 PE=1 SV=3	80.368	1542.2	1238.9	1240.3	1505.1	2116.1	1746.6	1250.6	1506.9	1.661	2	424.742	15	12146.7	296
O43292	Glycosylphosphatidylinositol anchor attachment 1 protein OS=Homo sapiens GN=GPAA1 PE=1 SV=3	67.58	1221.2	1314.1	1308.2	1652.8	1554.8	1654.4	1375.8	1993.1	2.775	0	276.244	13	12074.4	297
O14979-2	Isoform 2 of Heterogeneous nuclear ribonucleoprotein D-like OS=Homo sapiens GN=HNRNPDL	33.568	1708.3	1245.4	1032.5	1679.3	2013.3	1645.8	1182.1	1533.4	7.577	1	426.569	8	12040.1	298
Q6P2Q9	Pre-mRNA-processing-splicing factor 8 OS=Homo sapiens GN=PRPF8 PE=1 SV=2	273.427	1615.8	1332.7	1209.2	1565.4	2050.2	1641.5	1185.4	1413.2	0.479	0	301.739	23	12013.4	299
P62854	40S ribosomal protein S26 OS=Homo sapiens GN=RPS26 PE=1 SV=3	13.007	1782.9	1279.9	921.4	963.8	2765.7	1831.1	1154.4	1283.9	30.623	0	343.033	4	11983.1	300
H0YA96	Heterogeneous nuclear ribonucleoprotein D0 (Fragment) OS=Homo sapiens GN=HNRNPD PE=1 SV=1	23.906	1678.4	1261.3	1027.2	1479.5	2141	1712.6	1230.2	1405.2	7.483	0	472.528	8	11935.4	301
O95563	Mitochondrial pyruvate carrier 2 OS=Homo sapiens GN=MPC2 PE=1 SV=1	14.27	1502.6	1187	1177.5	1535.5	1916.4	1668.1	1268.1	1674.1	9	0	130.79	5	11929.3	302
O43390	Heterogeneous nuclear ribonucleoprotein R OS=Homo sapiens GN=HNRNPR PE=1 SV=1	70.899	1752.7	1256.4	974	1384.3	2058.1	1711.4	1146.9	1521.8	3.307	3	500.06	23	11805.6	303
P04406	Glyceraldehyde-3-phosphate dehydrogenase OS=Homo sapiens GN=GAPDH PE=1 SV=3	36.03	1271.9	1089.5	1330.3	1850.4	1793.6	1773.9	1205	1439.6	5.449	0	558.613	12	11754.2	304
Q86XR7-2	Isoform 2 of TIR domain-containing adapter molecule 2 OS=Homo sapiens GN=TICAM2	46.143	2022.2	2403	2388.9	2436.2	740.4	650.1	508.5	565.8	2.481	0	483.378	8	11715.1	305
E9PI68	Signal peptidase complex subunit 2 OS=Homo sapiens GN=SPCS2 PE=1 SV=1	28.485	1272.3	1253	1319.3	1623.9	1471.1	1592.1	1388.4	1761.8	3.217	0	255.874	8	11681.9	306
Q9NYU2	UDP-glucose:glycoprotein glucosyltransferase 1 OS=Homo sapiens GN=UGGT1 PE=1 SV=3	177.078	1548.5	1149.4	1175.6	1587.3	1886.4	1549.5	1198	1569.6	0.851	0	453.097	19	11664.3	307
P35998	26S protease regulatory subunit 7 OS=Homo sapiens GN=PSMC2 PE=1 SV=3	48.603	1455	1137.5	1242.5	1382.7	2129.6	1678.1	1225.6	1338.7	4.125	0	519.31	16	11589.7	308
Q9HC38-2	Isoform 2 of Glyoxalase domain-containing protein 4 OS=Homo sapiens GN=GLOD4	33.212	1326.1	1172.5	1239	1912.7	1481.5	1509.4	1298.7	1635.4	9	0	597.281	15	11575.3	309
Q2NL82	Pre-rRNA-processing protein TSR1 homolog OS=Homo sapiens GN=TSR1 PE=1 SV=1	91.752	1611.9	1198.1	1073.6	1251.3	2400.2	1601.1	1126.6	1306	1.482	0	396.37	11	11568.8	310
O43852-3	Isoform 3 of Calumenin OS=Homo sapiens GN=CALU	38.027	905.2	1106.2	1154.7	1711.8	1253.8	1623.6	1605	2145.5	6.743	4	363.257	12	11505.8	311
P17987	T-complex protein 1 subunit alpha OS=Homo sapiens GN=TCP1 PE=1 SV=1	60.306	1420.6	1093.3	1263.7	1563.4	1965.5	1564.8	1168.4	1349.8	3.354	0	591.213	18	11389.5	312
P07237	Protein disulfide-isomerase OS=Homo sapiens GN=P4HB PE=1 SV=3	57.081	1257	1098.3	1159.5	1521.4	1797	1539	1274	1698.9	3.467	4	624.826	17	11345.1	313
Q7Z7L1	Schlafen family member 11 OS=Homo sapiens GN=SLFN11 PE=1 SV=2	102.77	1410.3	1090.3	1114.6	1441.9	2080.5	1614.7	1189.3	1382.8	1.963	0	658.913	21	11324.4	314
Q99805	Transmembrane 9 superfamily member 2 OS=Homo sapiens GN=TM9SF2 PE=1 SV=1	75.725	1274	1285.7	1267	1603.4	1477.3	1560.7	1280.4	1556.2	2.594	0	549.24	9	11304.7	315
P00403	Cytochrome c oxidase subunit 2 OS=Homo sapiens GN=MT-CO2 PE=1 SV=1	25.548	1232.6	1147.9	1049.1	1381.7	1481	1800.4	1461.3	1692.2	20.544	0	419.759	6	11246.2	316
Q8NF37	Lysophosphatidylcholine acyltransferase 1 OS=Homo sapiens GN=LPCAT1 PE=1 SV=2	59.113	1261.4	1147.7	1074.6	1295.9	2072.4	1632.7	1176.3	1521.2	4.055	0	350.915	13	11182.2	317
P62263	40S ribosomal protein S14 OS=Homo sapiens GN=RPS14 PE=1 SV=3	16.263	1530.4	1178.6	966.4	1157.5	2306.4	1613.9	1155	1267.2	36.276	0	838.211	5	11175.4	318
P61289-2	Isoform 2 of Proteasome activator complex subunit 3 OS=Homo sapiens GN=PSME3	30.867	1215.9	1088.9	1315.5	1810	1382.3	1377.8	1321.5	1639.6	1.239	0	241.315	6	11151.5	319
P62857	40S ribosomal protein S28 OS=Homo sapiens GN=RPS28 PE=1 SV=1	7.836	1573.8	1164.7	879.9	1047.2	2567.5	1755.2	959.8	1093	20.544	0	245.02	2	11041.1	320
H7C2Q8	EBNA1 binding protein 2, isoform CRA_d OS=Homo sapiens GN=EBNA1BP2 PE=1 SV=1	40.659	1772.6	1149.4	826.2	1025.7	2422.8	1562.8	1049.6	1212.2	3.642	0	421.429	13	11021.3	321
P13073	Cytochrome c oxidase subunit 4 isoform 1, mitochondrial OS=Homo sapiens GN=COX4I1 PE=1 SV=1	19.564	1250.1	1133.5	1056.7	1382.2	1491.2	1792.9	1333.9	1580.8	11.115	0	446.09	7	11021.3	322
Q15006	ER membrane protein complex subunit 2 OS=Homo sapiens GN=EMC2 PE=1 SV=1	34.811	1116.3	1091	1235	1510.9	1443.8	1532.7	1345	1670.4	5.661	0	446.358	10	10945.1	323
A0A0U1RRH7	Histone H2A OS=Homo sapiens PE=3 SV=1	18.541	1391.3	1344.8	750.5	1977.6	1098.9	1793.6	1032.9	1544.4	9	0	535.017	4	10934	324
Q9H0D6	5'-3' exoribonuclease 2 OS=Homo sapiens GN=XRN2 PE=1 SV=1	108.513	1535.1	1141	1024.2	1257.7	2025.9	1505.3	1062.2	1372.3	1.069	0	304.923	16	10923.7	325
Q969X5	Endoplasmic reticulum-Golgi intermediate compartment protein 1 OS=Homo sapiens GN=ERGIC1 PE=1 SV=1	32.571	1130.6	1252.5	1384.7	1560.4	1311.7	1513.5	1295.4	1401	4.179	0	282.343	8	10849.8	326
Q9H3N1	Thioredoxin-related transmembrane protein 1 OS=Homo sapiens GN=TMX1 PE=1 SV=1	31.771	1155.9	1053.7	1547.3	1748.9	1436.1	1375.2	1251.6	1247.1	4.623	0	157.64	7	10815.8	327
P09669	Cytochrome c oxidase subunit 6C OS=Homo sapiens GN=COX6C PE=1 SV=2	8.776	1196.5	1063.9	972.8	1215.7	1573	1841.8	1293.9	1572.4	13.678	0	115.124	6	10730	328
Q14684	Ribosomal RNA processing protein 1 homolog B OS=Homo sapiens GN=RRP1B PE=1 SV=3	84.375	1723.7	1245.5	995.8	1264	1838.8	1340	1061.9	1235.6	1.728	0	374.071	16	10705.3	329
P50990	T-complex protein 1 subunit theta OS=Homo sapiens GN=CCT8 PE=1 SV=4	59.583	1240.3	1017.6	1288.5	1693.7	1479.3	1410	1199.9	1359.7	1.456	0	329.905	16	10689	330
Q96PK6	RNA-binding protein 14 OS=Homo sapiens GN=RBM14 PE=1 SV=2	69.449	2112.8	1203.2	732.8	825.5	2951.3	1310.6	748.4	792.7	4.623	0	329.515	16	10677.3	331
M0QXB4	Coatomer protein complex, subunit epsilon, isoform CRA_g OS=Homo sapiens GN=COPE PE=1 SV=1	36.901	1108.2	1027.1	1217.3	1295.5	1613.9	1619.7	1293.7	1465.6	3.16	0	368.001	9	10641	332
O94822-3	Isoform 3 of E3 ubiquitin-protein ligase listerin OS=Homo sapiens GN=LTN1	205.046	1509.8	1158.4	1077.3	1257.6	1962.8	1423.8	989.7	1185.9	0.859	0	508.815	24	10565.3	333
E7ETB3	Aspartyl aminopeptidase OS=Homo sapiens GN=DNPEP PE=1 SV=2	54.468	1252.2	1106.9	1243.1	1598.8	1463.1	1363.5	1164	1368.2	1.783	0	289.222	8	10559.8	334
P55209	Nucleosome assembly protein 1-like 1 OS=Homo sapiens GN=NAP1L1 PE=1 SV=1	45.346	1350.7	1010.2	1024.6	1321.2	1941.9	1460.8	1082.3	1365.3	6.356	6	395.83	8	10557	335
P31930	Cytochrome b-c1 complex subunit 1, mitochondrial OS=Homo sapiens GN=UQCRC1 PE=1 SV=3	52.612	1138.1	1004.7	1041.2	1354.4	1455.8	1670	1307.3	1559.5	4.754	0	811.97	14	10531	336
Q9UBM7	7-dehydrocholesterol reductase OS=Homo sapiens GN=DHCR7 PE=1 SV=1	54.454	1209.4	1237.3	1149	1452.2	1293.6	1427.7	1191.2	1554.4	4.275	0	371.591	8	10514.8	337
Q96CT7	Coiled-coil domain-containing protein 124 OS=Homo sapiens GN=CCDC124 PE=1 SV=1	25.82	1194.1	978.4	986.9	1245.9	2220.3	1529	1086.6	1264.3	6.356	0	542.33	9	10505.5	338
A0A087X117	Nodal modulator 1 OS=Homo sapiens GN=NOMO1 PE=1 SV=1	139.381	1182.7	1008	1090.7	1456.4	1548.8	1409	1197.5	1609	0.645	0	359.437	14	10502.1	339
P35908	Keratin, type II cytoskeletal 2 epidermal OS=Homo sapiens GN=KRT2 PE=1 SV=2	65.393	1132.5	1125.8	1205.6	1182.2	2564.9	970.4	1266.2	1042.8	2.427	2	692.04	18	10490.4	340
P57088	Transmembrane protein 33 OS=Homo sapiens GN=TMEM33 PE=1 SV=2	27.96	1338.4	1078.2	1059	1306.7	1653.8	1464.4	1132.4	1443.9	7.254	0	186.83	8	10476.8	341
P43304	Glycerol-3-phosphate dehydrogenase, mitochondrial OS=Homo sapiens GN=GPD2 PE=1 SV=3	80.802	1281.9	1063.5	1088.2	1372.4	1693.6	1418.2	1151.5	1325.5	1.188	0	378.82	14	10394.8	342
B3KMR5	cDNA FLJ12434 fis, clone NT2RM1000037, highly similar to Homo sapiens KIAA0690 protein OS=Homo sapiens PE=2 SV=1	143.581	1507.9	1087.3	851.5	1096.6	2044.7	1498.7	1019.1	1261.9	1.38	0	655.082	23	10367.7	343
H7C2I1	Protein arginine N-methyltransferase 1 OS=Homo sapiens GN=PRMT1 PE=1 SV=1	42.434	1190.7	1028.1	1205.4	1630	1352.6	1290.4	1170.9	1491.3	6.079	0	491.027	13	10359.4	344
P02545	Prelamin-A/C OS=Homo sapiens GN=LMNA PE=1 SV=1	74.095	1547.7	1167.3	901.3	1077	2119.9	1610.4	894.8	1032.5	2.594	0	435.16	22	10350.9	345
Q9BWF3	RNA-binding protein 4 OS=Homo sapiens GN=RBM4 PE=1 SV=1	40.289	1589.6	1063.3	828.9	904.8	2362	1524.2	925.7	1104.1	5.19	0	338.44	16	10302.6	346
Q9NTJ5	Phosphatidylinositide phosphatase SAC1 OS=Homo sapiens GN=SACM1L PE=1 SV=2	66.924	1266.4	1097.3	1135.1	1283.4	1596	1460.9	1113.1	1348.4	2.981	0	392.39	15	10300.6	347
P15170-3	Isoform 3 of Eukaryotic peptide chain release factor GTP-binding subunit ERF3A OS=Homo sapiens GN=GSPT1	68.656	1152	1040.9	1163	1596.5	1400.8	1337.7	1142.7	1454.4	0.874	0	191.836	9	10288	348
Q13885	Tubulin beta-2A chain OS=Homo sapiens GN=TUBB2A PE=1 SV=1	49.875	1468.9	1006	990	1186.2	2020.5	1451.5	951.4	1160.5	2226.54	3	7859.82	21	10235	349
Q9Y678	Coatomer subunit gamma-1 OS=Homo sapiens GN=COPG1 PE=1 SV=1	97.655	1072.3	1005.8	1174.7	1208.9	1675	1536.4	1217.3	1316.1	1.534	0	566.511	19	10206.5	350
Q9H8Y8-3	Isoform 3 of Golgi reassembly-stacking protein 2 OS=Homo sapiens GN=GORASP2	48.644	1669.7	1921.3	2305.3	2131.9	667.5	539.9	407	550.6	3.394	1	322.699	7	10193.2	351
P00390	Glutathione reductase, mitochondrial OS=Homo sapiens GN=GSR PE=1 SV=2	56.221	1163.9	1021	1392.9	1772.4	1196.9	1184.6	1105.3	1349.6	5.21	0	682.427	15	10186.6	352
Q9BU23	Lipase maturation factor 2 OS=Homo sapiens GN=LMF2 PE=1 SV=2	79.647	1278.9	1146.7	1111.8	1307.9	1544.3	1363.2	1032.3	1365.6	2.728	0	377.718	12	10150.7	353
Q9BS26	Endoplasmic reticulum resident protein 44 OS=Homo sapiens GN=ERP44 PE=1 SV=1	46.941	1314.4	1371.1	1480.9	1670.2	1204	1097.5	927	1080.4	2.831	1	216.2	11	10145.5	354
O43823	A-kinase anchor protein 8 OS=Homo sapiens GN=AKAP8 PE=1 SV=1	76.061	1423.1	1052.9	977.4	1070.7	2153.4	1396.4	996.6	1053.9	2.047	0	438.637	12	10124.4	355
Q15392	Delta(24)-sterol reductase OS=Homo sapiens GN=DHCR24 PE=1 SV=2	60.062	1286.3	1053.5	948.7	1014.9	1857.5	1482.3	1126.6	1342.9	1.291	0	189.895	6	10112.7	356
Q9NU22	Midasin OS=Homo sapiens GN=MDN1 PE=1 SV=2	632.42	1289.5	1075.6	1069.7	1372.3	1644.3	1347.6	1082.5	1203.6	0.244	0	492.15	30	10085.1	357
O00567	Nucleolar protein 56 OS=Homo sapiens GN=NOP56 PE=1 SV=4	66.009	1488.8	1065.9	759.2	1053.8	1845.1	1522.3	1041.4	1291	1.783	0	528.442	13	10067.5	358
P09651	Heterogeneous nuclear ribonucleoprotein A1 OS=Homo sapiens GN=HNRNPA1 PE=1 SV=5	38.723	1374	1182.2	850.5	1544.1	1390.8	1520.8	1020.8	1164.5	4.012	0	348.614	8	10047.7	359
Q8TC07-3	Isoform 3 of TBC1 domain family member 15 OS=Homo sapiens GN=TBC1D15	78.522	1415.4	1019.6	980.1	1219.9	1867.9	1370.1	995.4	1177.5	1.61	0	294.267	12	10045.9	360
P55060	Exportin-2 OS=Homo sapiens GN=CSE1L PE=1 SV=3	110.346	1108.2	986.7	1181.5	1543	1362.7	1324.3	1161.2	1360.5	0.814	0	408.387	13	10028.1	361
P49821	NADH dehydrogenase [ubiquinone] flavoprotein 1, mitochondrial OS=Homo sapiens GN=NDUFV1 PE=1 SV=4	50.785	1078.5	948.3	961.8	1200.4	1404.3	1594.5	1201.6	1415.5	2.3	0	377.201	10	9804.9	362
Q9NS86	LanC-like protein 2 OS=Homo sapiens GN=LANCL2 PE=1 SV=1	50.821	1042.6	943.2	1144.4	1571	1174.4	1227.5	1192.3	1506	4.109	0	419.918	13	9801.4	363
P52292	Importin subunit alpha-1 OS=Homo sapiens GN=KPNA2 PE=1 SV=1	57.826	1305.5	982.9	1011.4	1269.8	1660.6	1317.6	993.8	1175.6	1.212	0	229.15	10	9717.2	364
P43307	Translocon-associated protein subunit alpha OS=Homo sapiens GN=SSR1 PE=1 SV=3	32.215	892	877.9	962.3	1262.1	1266.2	1379.2	1316.5	1728.1	3.642	0	372.076	5	9684.3	365
Q6ZXV5	Transmembrane and TPR repeat-containing protein 3 OS=Homo sapiens GN=TMTC3 PE=1 SV=2	103.942	1056.8	1026.4	1082.6	1386.9	1212.7	1315.7	1164.3	1423.3	1.096	0	313.355	16	9668.7	366
O75131	Copine-3 OS=Homo sapiens GN=CPNE3 PE=1 SV=1	60.092	1300.7	1018.9	897.5	1068.9	1675.6	1275.8	1003.9	1361.8	2.981	3	370.493	16	9603.1	367
Q9UBN7	Histone deacetylase 6 OS=Homo sapiens GN=HDAC6 PE=1 SV=2	131.336	996.7	914.7	1116.8	1594.4	1263.9	1260.6	1105.5	1289	1.572	0	533.375	12	9541.6	368
Q7Z7H5	Transmembrane emp24 domain-containing protein 4 OS=Homo sapiens GN=TMED4 PE=1 SV=1	25.926	1620.4	1931	1814.8	1821	711.3	593.4	472.5	542.4	7.577	0	456.65	8	9506.8	369
P40227	T-complex protein 1 subunit zeta OS=Homo sapiens GN=CCT6A PE=1 SV=3	57.988	1147.1	858.3	1079.4	1368.6	1579.9	1307.6	1012.8	1148.6	2.282	0	495.132	13	9502.3	370
O14744	Protein arginine N-methyltransferase 5 OS=Homo sapiens GN=PRMT5 PE=1 SV=4	72.638	1199.6	1006	1052.7	1394.5	1510.6	1186.2	986.1	1159.6	0.725	0	163.908	8	9495.3	371
O94832	Unconventional myosin-Id OS=Homo sapiens GN=MYO1D PE=1 SV=2	116.129	1184.3	909.9	864.1	1156.8	1726.6	1285	1004.5	1312.9	0.792	0	366.814	17	9444.1	372
Q13423	NAD(P) transhydrogenase, mitochondrial OS=Homo sapiens GN=NNT PE=1 SV=3	113.823	1099.4	923.6	914.3	1252	1254.5	1414.3	1080.5	1390.4	2.775	0	490.627	25	9329	373
Q9BTV4	Transmembrane protein 43 OS=Homo sapiens GN=TMEM43 PE=1 SV=1	44.847	1173.8	1000.5	934	1193.5	1379.6	1308.1	1050.1	1276	2.675	0	190.797	11	9315.6	374
Q9H9B4	Sideroflexin-1 OS=Homo sapiens GN=SFXN1 PE=1 SV=4	35.596	1153.5	951.8	942.3	1271.1	1474	1291	994	1169	7.913	0	750.724	12	9246.7	375
O14787-2	Isoform 2 of Transportin-2 OS=Homo sapiens GN=TNPO2	100.343	1060.5	904.2	1039.8	1441	1208.5	1185.5	1033.1	1363	1.404	3	303.91	14	9235.6	376
A0AVT1	Ubiquitin-like modifier-activating enzyme 6 OS=Homo sapiens GN=UBA6 PE=1 SV=1	117.895	1034.7	840.1	1026.5	1421.2	1271.6	1164.1	1074.4	1370.8	1.235	0	689.798	17	9203.4	377
P51970	NADH dehydrogenase [ubiquinone] 1 alpha subcomplex subunit 8 OS=Homo sapiens GN=NDUFA8 PE=1 SV=3	20.092	1133.6	888.5	865.3	1129.1	1299.9	1511.5	1048.3	1286.1	4.337	0	104.243	6	9162.3	378
Q08379	Golgin subfamily A member 2 OS=Homo sapiens GN=GOLGA2 PE=1 SV=3	113.017	1402.1	1541.2	1639.2	1681	909	725.2	565.5	685.3	1.049	0	462.286	17	9148.5	379
Q9BUN8	Derlin-1 OS=Homo sapiens GN=DERL1 PE=1 SV=1	28.782	735.5	970.5	827.6	931.2	1233.5	1633.1	1334.4	1477.7	9	0	376.24	6	9143.5	380
Q6PKG0	La-related protein 1 OS=Homo sapiens GN=LARP1 PE=1 SV=2	123.434	1250.1	977.6	844.2	956.1	1768.1	1341.9	902.2	1046.5	1.909	1	513.008	27	9086.7	381
P60866	40S ribosomal protein S20 OS=Homo sapiens GN=RPS20 PE=1 SV=1	13.364	1179.4	975.1	747.3	936.2	1861.4	1285.5	881.8	1178.2	30.623	0	253.634	5	9044.9	382
O75190	DnaJ homolog subfamily B member 6 OS=Homo sapiens GN=DNAJB6 PE=1 SV=2	36.065	1279.4	958.3	898.4	1000.4	1789	1253.5	858.3	1003.4	5.105	6	324.629	8	9040.7	383
Q5H9R7-5	Isoform 5 of Serine/threonine-protein phosphatase 6 regulatory subunit 3 OS=Homo sapiens GN=PPP6R3	98.423	1140.7	889.6	935	1106.9	1667.2	1225.8	955.8	1068	1.512	0	403.697	18	8989	384
P49458	Signal recognition particle 9 kDa protein OS=Homo sapiens GN=SRP9 PE=1 SV=2	10.105	1277.8	877.5	667.2	831.1	1820.5	1229.1	847.7	1413.9	25.827	0	215.88	6	8964.8	385
Q14697-2	Isoform 2 of Neutral alpha-glucosidase AB OS=Homo sapiens GN=GANAB	109.369	1009.9	927.3	917.6	1254	1358.8	1226.7	971.2	1299	1.096	0	396.071	13	8964.5	386
Q13190	Syntaxin-5 OS=Homo sapiens GN=STX5 PE=1 SV=2	39.648	964.4	994.1	1096	1310.4	1217.7	1222.3	988.7	1168.1	1.721	0	311.64	9	8961.7	387
H0Y368	Dolichol-phosphate mannosyltransferase subunit 1 (Fragment) OS=Homo sapiens GN=DPM1 PE=1 SV=1	33.307	1060.7	908.3	861.9	1012	1718.8	1298.9	970.5	1125.9	4.456	0	350.75	10	8957	388
Q6IBR2	FARSLA protein OS=Homo sapiens GN=FARSLA PE=2 SV=1	57.528	1126.8	929.4	970.5	1222	1392.2	1179.6	1003.6	1105.5	3.894	0	528.234	14	8929.6	389
P14866	Heterogeneous nuclear ribonucleoprotein L OS=Homo sapiens GN=HNRNPL PE=1 SV=2	64.092	1109.4	971	795.8	1309.5	1246	1321.2	977.2	1198.5	2.415	5	451.736	13	8928.6	390
P06733	Alpha-enolase OS=Homo sapiens GN=ENO1 PE=1 SV=2	47.139	922.2	799.7	1167.8	1420.3	1301.6	1423.5	849.6	976.8	1.593	0	305.005	10	8861.5	391
Q9Y3A6	Transmembrane emp24 domain-containing protein 5 OS=Homo sapiens GN=TMED5 PE=1 SV=1	25.988	1333.9	1593.6	2189.2	1986.8	511.9	478.4	360.1	385.8	2.831	0	233.02	4	8839.7	392
Q9Y673	Dolichyl-phosphate beta-glucosyltransferase OS=Homo sapiens GN=ALG5 PE=1 SV=1	36.922	1152.4	976.7	958.9	1042	1605.8	1232.3	881.1	985	1.994	0	316.96	8	8834.2	393
P37108	Signal recognition particle 14 kDa protein OS=Homo sapiens GN=SRP14 PE=1 SV=2	14.561	1254.2	855.8	720.3	915.2	1867.2	1292.4	861.4	1019.7	6.499	0	260.275	4	8786.2	394
Q9Y5M8	Signal recognition particle receptor subunit beta OS=Homo sapiens GN=SRPRB PE=1 SV=3	29.684	971.5	859	838.9	1020.9	1327.9	1303.9	1078.8	1359.7	5.158	0	511.63	9	8760.6	395
P61011	Signal recognition particle 54 kDa protein OS=Homo sapiens GN=SRP54 PE=1 SV=1	55.668	1170.7	789.7	695	942.8	1941	1329	852.2	1032.7	1.246	0	364.84	10	8753.1	396
P55084	Trifunctional enzyme subunit beta, mitochondrial OS=Homo sapiens GN=HADHB PE=1 SV=3	51.262	1162.8	989	1002.1	1135.5	1331.8	1207.3	916.7	978.5	2.282	1	315.695	15	8723.7	397
Q8WUY1	Protein THEM6 OS=Homo sapiens GN=THEM6 PE=1 SV=2	23.85	1039.6	974.8	1019.2	1247.6	1226.7	1185.3	942.9	1059.4	3.217	0	116.36	8	8695.5	398
Q9P0H9	Protein RER1 OS=Homo sapiens GN=RER1 PE=1 SV=1	24.801	974.4	1045.2	1113.8	1247.3	1105.4	1166.9	953.1	1088.5	3.924	0	292.89	4	8694.6	399
P67809	Nuclease-sensitive element-binding protein 1 OS=Homo sapiens GN=YBX1 PE=1 SV=3	35.903	1139.8	882.7	838.3	971.3	1617.5	1248.7	868.8	1063.6	12.895	2	703.05	12	8630.7	400
Q13263	Transcription intermediary factor 1-beta OS=Homo sapiens GN=TRIM28 PE=1 SV=5	88.493	1150.7	814.9	940.2	1200.6	1405.3	1112.8	896	1101.1	1.907	0	440.89	17	8621.6	401
Q7L1Q6-3	Isoform 3 of Basic leucine zipper and W2 domain-containing protein 1 OS=Homo sapiens GN=BZW1	51.249	1118.3	862.2	897.3	1053.1	1487.5	1175.4	893.6	1080.5	1.207	1	111.06	9	8567.9	402
Q96EY1	DnaJ homolog subfamily A member 3, mitochondrial OS=Homo sapiens GN=DNAJA3 PE=1 SV=2	52.456	1133.9	837.6	893	976.7	1599.3	1221.5	892.6	913.9	1.424	0	282.809	7	8468.5	403
P45880-1	Isoform 1 of Voltage-dependent anion-selective channel protein 2 OS=Homo sapiens GN=VDAC2	33.351	880.4	785.5	858.7	1140.2	1084	1314.3	1005	1384.6	6.848	0	512.97	10	8452.7	404
Q32Q12	Nucleoside diphosphate kinase OS=Homo sapiens GN=NME1-NME2 PE=1 SV=1	32.621	949.9	796.4	1023.1	1325.8	1148.8	1112.8	965.5	1127.5	1.994	0	102.237	9	8449.8	405
P00387-3	Isoform 3 of NADH-cytochrome b5 reductase 3 OS=Homo sapiens GN=CYB5R3	38.202	988.4	797.5	818.6	1022.1	1519.5	1272.6	893.2	1107.8	2.981	0	349.234	7	8419.7	406
P60981	Destrin OS=Homo sapiens GN=DSTN PE=1 SV=3	18.493	892.5	769.5	1020	1278.6	1068.5	1093.9	978.5	1311.1	13.251	0	280.78	10	8412.6	407
O94905	Erlin-2 OS=Homo sapiens GN=ERLIN2 PE=1 SV=1	37.815	1071.8	1096.5	1140.3	1483.9	878.6	919.3	799.3	994.5	4.109	2	391.522	13	8384.2	408
P55265-4	Isoform 4 of Double-stranded RNA-specific adenosine deaminase OS=Homo sapiens GN=ADAR	140.749	1135.5	865.2	693.9	939.3	1523.2	1256.7	881	1025.5	0.54	0	312.704	14	8320.3	409
P11388-4	Isoform 4 of DNA topoisomerase 2-alpha OS=Homo sapiens GN=TOP2A	182.567	1086	896	769.7	1042.8	1477.6	1251.5	805	986.5	0.428	3	241.923	15	8315.1	410
Q96CS3	FAS-associated factor 2 OS=Homo sapiens GN=FAF2 PE=1 SV=2	52.591	933.7	834.2	774.1	995.4	1258.2	1230.2	977.6	1268	7.432	0	602.34	17	8271.4	411
P50454	Serpin H1 OS=Homo sapiens GN=SERPINH1 PE=1 SV=2	46.411	939.6	848.3	821.7	1117.8	1239.5	1102.1	942	1175.1	4.754	0	478.869	14	8186.1	412
P78371	T-complex protein 1 subunit beta OS=Homo sapiens GN=CCT2 PE=1 SV=4	57.452	877.1	767.5	980.8	1265	1166.3	1096.7	920.2	1071.3	1.966	0	728.634	13	8144.9	413
A0A087WYT3	Prostaglandin E synthase 3 OS=Homo sapiens GN=PTGES3 PE=1 SV=1	19.143	931.2	794.8	929.4	1291.6	1105	1012.4	910.1	1135.6	9	0	244.56	6	8110.1	414
P56537	Eukaryotic translation initiation factor 6 OS=Homo sapiens GN=EIF6 PE=1 SV=1	26.582	1061.3	801.6	764.9	916.5	1736.8	1053.8	763.8	1004.9	16.783	0	552.98	9	8103.6	415
Q9Y5A9	YTH domain-containing family protein 2 OS=Homo sapiens GN=YTHDF2 PE=1 SV=2	62.296	1278	860.7	757.6	842	1599.2	1115.3	770.6	850.4	2.728	1	259.477	8	8073.8	416
O15226-2	Isoform 2 of NF-kappa-B-repressing factor OS=Homo sapiens GN=NKRF	79.446	1167.5	828.3	745.5	833.5	1601.3	1133	764.4	998.7	1.683	0	382.379	17	8072.2	417
P56385	ATP synthase subunit e, mitochondrial OS=Homo sapiens GN=ATP5I PE=1 SV=2	7.928	1046.6	837.5	737	924.6	1485	1141.8	776.6	1113.9	38.811	1	254.92	6	8063	418
Q9H078-2	Isoform 2 of Caseinolytic peptidase B protein homolog OS=Homo sapiens GN=CLPB	75.402	994.2	830.7	884	1036.8	1375.8	1109.6	824.1	996.2	1.985	0	325.908	16	8051.4	419
P35527	Keratin, type I cytoskeletal 9 OS=Homo sapiens GN=KRT9 PE=1 SV=3	62.027	940.8	738.3	811.1	1297.3	1326.7	1169	879	878.4	2.162	0	475.271	11	8040.6	420
G3V5T9	Cyclin-dependent kinase 2 OS=Homo sapiens GN=CDK2 PE=1 SV=1	39.153	935.2	806.5	920	1129.5	1182.6	1036.6	872.4	1128.5	2.008	0	273.04	9	8011.3	421
O00425	Insulin-like growth factor 2 mRNA-binding protein 3 OS=Homo sapiens GN=IGF2BP3 PE=1 SV=2	63.666	1151.3	745.6	697.3	925.1	1621.1	1069.8	751.3	1039.6	2.49	1	573.523	15	8001.1	422
Q09028	Histone-binding protein RBBP4 OS=Homo sapiens GN=RBBP4 PE=1 SV=3	47.626	1006.9	738.3	860.7	1066.9	1300.2	1146.4	822.9	1046	2.981	3	263.511	9	7988.3	423
Q9H490	Phosphatidylinositol glycan anchor biosynthesis class U protein OS=Homo sapiens GN=PIGU PE=1 SV=3	50.019	788.3	881.1	943.3	1128.1	1048.1	1145.2	965.7	1076.9	2.455	0	274.467	4	7976.7	424
J3KNA0	Mitochondrial inner membrane protein OXA1L OS=Homo sapiens GN=OXA1L PE=1 SV=1	55.234	1239.7	906.5	816.4	1019.6	1275.9	1117.3	764.1	827.6	0.823	0	103.67	6	7967.1	425
P49368	T-complex protein 1 subunit gamma OS=Homo sapiens GN=CCT3 PE=1 SV=4	60.495	844.6	686.3	926.2	1250.5	1158.2	1111.4	886.6	1088.5	2.57	0	316.277	17	7952.3	426
O43592	Exportin-T OS=Homo sapiens GN=XPOT PE=1 SV=2	109.893	922.2	785.5	888.3	1190.8	1118.9	1055	879	1111.4	1.19	0	418.294	13	7951.1	427
P55011	Solute carrier family 12 member 2 OS=Homo sapiens GN=SLC12A2 PE=1 SV=1	131.364	907.4	842.8	933.2	1206.7	1146.3	1045.8	873.4	987	0.647	0	185.89	12	7942.6	428
P10809	60 kDa heat shock protein, mitochondrial OS=Homo sapiens GN=HSPD1 PE=1 SV=2	61.016	820.5	729.6	918.9	1330.3	1094.8	1056.4	879.4	1104.7	4.623	0	904.11	22	7934.6	429
P08240	Signal recognition particle receptor subunit alpha OS=Homo sapiens GN=SRPRA PE=1 SV=2	69.767	926.6	853.6	890.7	1101.6	1215.2	1053	849.2	975.4	2.252	0	527.498	16	7865.3	430
P05455	Lupus La protein OS=Homo sapiens GN=SSB PE=1 SV=2	46.808	1147.9	835.8	764.4	928.6	1333.9	1123.9	802.2	855.4	1.807	0	194.73	10	7792.1	431
Q5R363	SRSF protein kinase 1 OS=Homo sapiens GN=SRPK1 PE=1 SV=2	92.306	1075.5	781.8	703.5	906.5	1409	1128.5	796	984.9	1.54	1	407.331	15	7785.7	432
P07900-2	Isoform 2 of Heat shock protein HSP 90-alpha OS=Homo sapiens GN=HSP90AA1	98.099	764.7	591	956.6	1395.1	1109.2	1042.5	895.9	1011.9	4.429	0	1091.41	26	7766.9	433
A0A0U1RRM4	Polypyrimidine tract-binding protein 1 OS=Homo sapiens GN=PTBP1 PE=1 SV=1	62.425	891.3	760	846	1215.4	1064.5	1013.1	867	1101	0.978	1	368.59	7	7758.3	434
D6RB85	Calnexin (Fragment) OS=Homo sapiens GN=CANX PE=1 SV=1	15.998	889.8	681.3	516.1	616.6	1752.6	1224.3	861.8	1206.8	1388.49	0	1237.62	10	7749.3	435
Q9BRJ6	Uncharacterized protein C7orf50 OS=Homo sapiens GN=C7orf50 PE=1 SV=1	22.07	1117.4	789.2	623.5	733	1646	1134.4	775.3	923.3	4.337	0	325.855	6	7742.1	436
P14868	Aspartate--tRNA ligase, cytoplasmic OS=Homo sapiens GN=DARS PE=1 SV=2	57.1	926.4	784	841.2	1152.4	1186.3	1042	856.5	929.9	1.239	0	214.29	13	7718.7	437
Q9H845	Acyl-CoA dehydrogenase family member 9, mitochondrial OS=Homo sapiens GN=ACAD9 PE=1 SV=1	68.717	895	719.6	758	985.2	1132.3	1141.5	909.6	1176.1	0.855	0	222.73	10	7717.3	438
Q99714	3-hydroxyacyl-CoA dehydrogenase type-2 OS=Homo sapiens GN=HSD17B10 PE=1 SV=3	26.906	851.8	755.8	876.7	1298.7	1047.3	1020.5	790.8	1012.8	9	0	497.18	11	7654.4	439
O43402	ER membrane protein complex subunit 8 OS=Homo sapiens GN=EMC8 PE=1 SV=1	23.758	857.6	781.4	805.8	969	1119.4	1061.8	894.8	1134.7	7.377	0	296.63	9	7624.5	440
P36542	ATP synthase subunit gamma, mitochondrial OS=Homo sapiens GN=ATP5C1 PE=1 SV=1	32.975	1021.5	786.2	760.7	1007.9	1314.1	1022.7	748.6	959.9	9	0	501.4	10	7621.6	441
Q9NRP0-2	Isoform 2 of Oligosaccharyltransferase complex subunit OSTC OS=Homo sapiens GN=OSTC	19.158	757.5	715.5	785.4	852.5	999.8	1159	961.6	1372	2.162	0	129.64	3	7603.3	442
Q6NUQ4	Transmembrane protein 214 OS=Homo sapiens GN=TMEM214 PE=1 SV=2	77.101	835	690.5	705.5	877.2	1458.8	1188.4	848	974.6	3.125	0	451.332	18	7578	443
Q9UMS4	Pre-mRNA-processing factor 19 OS=Homo sapiens GN=PRPF19 PE=1 SV=1	55.146	1058.4	784.6	696.7	883.2	1388.4	1087.1	757.4	904	2.675	0	262.643	9	7559.8	444
A0A140T930	HLA class I histocompatibility antigen, Cw-6 alpha chain OS=Homo sapiens GN=HLA-C PE=1 SV=1	44.405	1003.9	997.5	1031.1	1230.9	923.6	894.8	736.2	729.3	2.325	5	408.237	9	7547.3	445
O75419-3	Isoform 3 of Cell division control protein 45 homolog OS=Homo sapiens GN=CDC45	68.724	1039	775.7	761.4	960.5	1360.6	1021.3	738.7	872.5	1.913	0	235.416	11	7529.7	446
Q15758	Neutral amino acid transporter B(0) OS=Homo sapiens GN=SLC1A5 PE=1 SV=2	56.562	842.1	871.3	892.7	1154	923.3	978.7	833.2	1034.2	2.899	0	482.353	8	7529.5	447
Q6P1J9	Parafibromin OS=Homo sapiens GN=CDC73 PE=1 SV=1	60.539	1153.6	806	666	765.2	1575	1076	653.1	828.9	0.931	0	192	11	7523.8	448
O14561	Acyl carrier protein, mitochondrial OS=Homo sapiens GN=NDUFAB1 PE=1 SV=3	17.406	775.8	700.8	737.2	967.5	936.2	1233.1	944.7	1173.8	1.512	0	98.45	4	7469.1	449
O95394-4	Isoform 3 of Phosphoacetylglucosamine mutase OS=Homo sapiens GN=PGM3	62.902	832.3	659.5	738	932.3	1412.1	1072.7	831.7	980.9	0.655	0	170.82	7	7459.5	450
Q9BVC6	Transmembrane protein 109 OS=Homo sapiens GN=TMEM109 PE=1 SV=1	26.194	891.1	897.3	814.2	922.5	1140.1	989.2	754.6	962.4	2.511	0	213.31	4	7371.4	451
Q8TBQ9	Protein kish-A OS=Homo sapiens GN=TMEM167A PE=1 SV=1	8.054	719.2	848.5	863.4	1062.2	886.9	967.8	904.9	1087.6	16.783	0	100.9	2	7340.5	452
Q9Y679	Ancient ubiquitous protein 1 OS=Homo sapiens GN=AUP1 PE=1 SV=1	52.995	899.3	786.9	781.3	914	1130.3	1068.4	828.1	910	2.631	0	347.568	10	7318.3	453
O95864	Fatty acid desaturase 2 OS=Homo sapiens GN=FADS2 PE=1 SV=1	52.226	867.6	753	728.7	883.1	1220.3	1096.1	805.3	964.1	1.154	0	182.25	7	7318.2	454
P13797	Plastin-3 OS=Homo sapiens GN=PLS3 PE=1 SV=4	70.766	833.2	699.8	785	1075	991.1	974.8	854.2	1101.6	1.834	0	248.537	17	7314.7	455
Q6P1A2	Lysophospholipid acyltransferase 5 OS=Homo sapiens GN=LPCAT3 PE=1 SV=1	55.998	892.6	820.8	819.4	994.5	1007.5	967.2	811.2	997	1.565	0	250.383	6	7310.2	456
E7EQ34	Uncharacterized protein OS=Homo sapiens PE=4 SV=2	26.848	803.7	836.1	850.6	948.7	1037.3	1028.1	830.9	929.9	4.179	0	351.32	7	7265.3	457
P33947	ER lumen protein-retaining receptor 2 OS=Homo sapiens GN=KDELR2 PE=1 SV=1	24.406	571.7	876.5	943.2	1010.8	720.5	836.7	776.3	1511.4	3.642	2	201.853	4	7247.1	458
Q9Y276	Mitochondrial chaperone BCS1 OS=Homo sapiens GN=BCS1L PE=1 SV=1	47.504	902.9	741.8	769.7	924.9	1240.3	1051.2	780.1	835.7	2.631	0	329.657	11	7246.6	459
O95470	Sphingosine-1-phosphate lyase 1 OS=Homo sapiens GN=SGPL1 PE=1 SV=3	63.483	967.7	750.4	725.7	847.5	1321.4	1041.7	756.7	823.6	1.207	0	223.25	11	7234.7	460
Q9H0V9-2	Isoform 2 of VIP36-like protein OS=Homo sapiens GN=LMAN2L	40.956	1031.6	1064.4	1156.8	1258.7	798	707.1	561.5	630.1	1.371	0	151.474	8	7208.2	461
P04075-2	Isoform 2 of Fructose-bisphosphate aldolase A OS=Homo sapiens GN=ALDOA	45.232	696	576.2	823.7	1222	1016.4	1007.1	814.6	1028.4	1.61	0	327.65	9	7184.4	462
Q9UPU5	Ubiquitin carboxyl-terminal hydrolase 24 OS=Homo sapiens GN=USP24 PE=1 SV=3	294.178	903.1	720.5	767.5	1037.2	1104.3	913.9	769.6	891.5	0.427	1	285.105	21	7107.6	463
A1L0T0	Acetolactate synthase-like protein OS=Homo sapiens GN=ILVBL PE=1 SV=2	67.825	912.4	724.8	744.8	927.7	1234.4	952.1	737.8	828.2	1.656	0	517.43	13	7062.2	464
B7ZM99	MTHFD1L protein OS=Homo sapiens GN=MTHFD1L PE=1 SV=1	105.823	866.5	718.3	762.5	1082.1	1005.4	941.3	779.3	902.7	0.931	0	276.068	14	7058.1	465
P04080	Cystatin-B OS=Homo sapiens GN=CSTB PE=1 SV=2	11.133	918.6	753.3	901.6	1149	824.7	812.5	734.4	952.8	67.129	0	375.417	6	7046.9	466
O00264	Membrane-associated progesterone receptor component 1 OS=Homo sapiens GN=PGRMC1 PE=1 SV=3	21.658	873.1	720.2	734	955.9	927.6	960.3	779.6	1024.7	4.337	0	215.733	5	6975.4	467
Q13162	Peroxiredoxin-4 OS=Homo sapiens GN=PRDX4 PE=1 SV=1	30.521	891.6	822.4	946.2	1390	829.8	711.1	572.1	741	9	0	504.011	10	6904.2	468
E9PR30	40S ribosomal protein S30 OS=Homo sapiens GN=FAU PE=1 SV=1	10.898	993.9	706.3	588.1	653.5	1437.7	1027.4	639.6	794.8	2.162	0	135.785	1	6841.3	469
P30520	Adenylosuccinate synthetase isozyme 2 OS=Homo sapiens GN=ADSS PE=1 SV=3	50.066	758.2	668.9	745	1113.1	996.1	826.2	741.4	957.2	2.433	0	327.144	11	6806.1	470
A0A087WV81	Mannose-P-dolichol utilization defect 1 protein OS=Homo sapiens GN=MPDU1 PE=1 SV=1	31.963	775	750.1	735.6	890.8	980.1	903.7	770.2	962.6	0.995	0	147.777	2	6768.1	471
P37268	Squalene synthase OS=Homo sapiens GN=FDFT1 PE=1 SV=1	48.084	1005.1	815	774.4	824.5	1081.5	875.2	668.8	715.9	3.642	0	423.738	10	6760.4	472
P0CG08	Golgi pH regulator B OS=Homo sapiens GN=GPR89B PE=1 SV=1	52.882	783.5	818.5	873.5	972.9	889.1	842.6	726.3	837.8	1.015	0	251.885	6	6744.2	473
Q9UKD2	mRNA turnover protein 4 homolog OS=Homo sapiens GN=MRTO4 PE=1 SV=2	27.543	992.3	751	560.1	641.4	1419.9	948	623.8	797	2.652	0	193.572	8	6733.5	474
P31153	S-adenosylmethionine synthase isoform type-2 OS=Homo sapiens GN=MAT2A PE=1 SV=1	43.633	762.4	696.2	825.3	1065.3	886.9	857.4	717.2	922.1	3.062	0	233.24	12	6732.8	475
P42167	Lamina-associated polypeptide 2, isoforms beta/gamma OS=Homo sapiens GN=TMPO PE=1 SV=2	50.639	773.9	733.2	754.8	926.8	883.8	920.1	753.6	942.9	6.017	0	505.537	15	6689.1	476
Q16718	NADH dehydrogenase [ubiquinone] 1 alpha subcomplex subunit 5 OS=Homo sapiens GN=NDUFA5 PE=1 SV=3	13.45	765.6	642	677	775.2	969.6	1064.7	836.5	943.2	9	0	179.067	4	6673.8	477
Q9NW13	RNA-binding protein 28 OS=Homo sapiens GN=RBM28 PE=1 SV=3	85.685	1040.1	722.1	544.4	691.7	1210.3	938.2	648.6	840.9	0.456	0	156.99	7	6636.3	478
P28331-2	Isoform 2 of NADH-ubiquinone oxidoreductase 75 kDa subunit, mitochondrial OS=Homo sapiens GN=NDUFS1	80.945	777.8	642.8	619.3	820.4	1047.7	1035.3	758.2	913.1	2.981	0	557.755	22	6614.6	479
Q96NB2	Sideroflexin-2 OS=Homo sapiens GN=SFXN2 PE=1 SV=2	36.208	879.8	661.6	660.3	932.9	1092.7	919.4	654.2	813	0.874	0	98.74	6	6613.9	480
Q8IY81	pre-rRNA processing protein FTSJ3 OS=Homo sapiens GN=FTSJ3 PE=1 SV=2	96.499	1041.2	715.1	546.8	667.3	1239.9	952.5	637.8	806	1.192	0	221.727	13	6606.6	481
O00186	Syntaxin-binding protein 3 OS=Homo sapiens GN=STXBP3 PE=1 SV=2	67.721	723	695.9	777.9	975.4	958.4	894.1	741.4	828	0.833	0	152.857	10	6594.1	482
P24539	ATP synthase F(0) complex subunit B1, mitochondrial OS=Homo sapiens GN=ATP5F1 PE=1 SV=2	28.89	828.3	645.7	664.3	801.1	1156.6	928.9	689.3	869.9	4.817	0	301.605	9	6584.1	483
J3KTL2	Serine/arginine-rich-splicing factor 1 OS=Homo sapiens GN=SRSF1 PE=1 SV=1	28.312	882.7	782.7	592.8	902.1	995.2	1009.5	632.2	753.1	3.87	0	290.623	9	6550.3	484
Q14247	Src substrate cortactin OS=Homo sapiens GN=CTTN PE=1 SV=2	61.549	883.2	676.8	660.1	854.3	1149	900.5	666.3	739.9	2.535	0	312.059	15	6530.1	485
E5RJR5	S-phase kinase-associated protein 1 OS=Homo sapiens GN=SKP1 PE=1 SV=1	18.708	805.4	665.9	750.9	960.9	1007.8	873.7	664.4	798	9	0	315.813	8	6527	486
O75694	Nuclear pore complex protein Nup155 OS=Homo sapiens GN=NUP155 PE=1 SV=1	155.1	776.3	667.1	718.2	928.1	941.3	857.5	728.4	880.2	1.477	0	490.18	22	6497.1	487
Q8WY22	BRI3-binding protein OS=Homo sapiens GN=BRI3BP PE=1 SV=1	27.818	764.1	692.7	681.1	751	1089	909.9	719.8	888.7	3.642	0	364.394	4	6496.3	488
Q8WTT2	Nucleolar complex protein 3 homolog OS=Homo sapiens GN=NOC3L PE=1 SV=1	92.49	1050	732.7	569.4	723.1	1102.2	867.9	633	815.5	0.619	0	197.413	8	6493.8	489
H3BPE7	RNA-binding protein FUS OS=Homo sapiens GN=FUS PE=1 SV=1	53.465	1030.2	632.9	466.1	740.2	1352.7	948.1	592.8	729.6	2.162	2	156.477	6	6492.6	490
O15400	Syntaxin-7 OS=Homo sapiens GN=STX7 PE=1 SV=4	29.797	685.3	733.6	757.3	923.9	918.1	885.5	731.6	846.4	5.105	0	203.272	9	6481.7	491
Q9BRP1	Programmed cell death protein 2-like OS=Homo sapiens GN=PDCD2L PE=1 SV=1	39.391	730.7	651.4	831	1045.5	834.6	804.5	719.5	855	1.448	0	171.439	7	6472.2	492
P06753-2	Isoform 2 of Tropomyosin alpha-3 chain OS=Homo sapiens GN=TPM3	29.015	679.1	621.8	730.3	1091.3	902.6	850.1	717.6	874.9	1.994	0	284.12	7	6467.7	493
Q96TA2	ATP-dependent zinc metalloprotease YME1L1 OS=Homo sapiens GN=YME1L1 PE=1 SV=2	86.401	849.7	617.2	603.8	897.9	1126.6	831.8	625.6	905.4	0.798	0	388.043	11	6458	494
P42696	RNA-binding protein 34 OS=Homo sapiens GN=RBM34 PE=1 SV=2	48.535	965.3	678.7	557.2	677.7	1247.2	889.2	617	812.3	1.264	0	282.286	10	6444.6	495
Q9BQ67	Glutamate-rich WD repeat-containing protein 1 OS=Homo sapiens GN=GRWD1 PE=1 SV=1	49.388	934.1	661.2	535.5	667.9	1335	890.4	624.7	732.2	2.981	0	575.87	10	6381	496
Q8NEZ5	F-box only protein 22 OS=Homo sapiens GN=FBXO22 PE=1 SV=1	44.48	746	618	741.3	1012.1	826.1	808.9	708.3	898.5	1.61	1	244.209	9	6359.2	497
P12004	Proliferating cell nuclear antigen OS=Homo sapiens GN=PCNA PE=1 SV=1	28.75	792.7	598.6	657.1	860.9	1127.4	880.5	660.6	779.8	2.793	0	247.747	9	6357.6	498
Q9Y282-3	Isoform 3 of Endoplasmic reticulum-Golgi intermediate compartment protein 3 OS=Homo sapiens GN=ERGIC3	43.744	749.8	771.9	850.8	995.2	820.8	778.4	611.9	766.8	2.594	0	135.88	8	6345.6	499
Q14318-2	Isoform 2 of Peptidyl-prolyl cis-trans isomerase FKBP8 OS=Homo sapiens GN=FKBP8	44.621	753.3	628.2	677.7	921.2	960.4	867.4	688.5	844.9	4.179	0	354.937	10	6341.6	500
O75340	Programmed cell death protein 6 OS=Homo sapiens GN=PDCD6 PE=1 SV=1	21.855	662.8	622.3	756	923	878.5	828.5	727.7	927.6	1.848	0	152.24	5	6326.4	501
P16104	Histone H2AX OS=Homo sapiens GN=H2AFX PE=1 SV=2	15.135	812	798.2	462.5	1037.4	771.4	984.8	592	864	11.915	3	238.789	6	6322.3	502
Q2TAA2	Isoamyl acetate-hydrolyzing esterase 1 homolog OS=Homo sapiens GN=IAH1 PE=1 SV=1	27.581	704	613	693.9	985.9	799.3	758.5	701	1043.8	7.254	0	514.503	9	6299.4	503
Q9NX14-2	Isoform 2 of NADH dehydrogenase [ubiquinone] 1 beta subcomplex subunit 11, mitochondrial OS=Homo sapiens GN=NDUFB11	18.352	814.6	666.8	629.4	765.1	921.1	947.3	704.3	839.9	1.894	0	214.001	3	6288.5	504
P60468	Protein transport protein Sec61 subunit beta OS=Homo sapiens GN=SEC61B PE=1 SV=2	9.968	764.5	636.5	572.5	628.2	1145.4	946.9	707.8	885.8	9	0	240.79	3	6287.6	505
P49792	E3 SUMO-protein ligase RanBP2 OS=Homo sapiens GN=RANBP2 PE=1 SV=2	357.974	797.4	630.1	685.5	880.5	992.9	821.9	659.4	799.7	0.228	1	211.523	18	6267.4	506
P12956	X-ray repair cross-complementing protein 6 OS=Homo sapiens GN=XRCC6 PE=1 SV=2	69.799	797.4	590	639.8	845.3	1034.5	854.7	653.4	837.4	2.162	0	292.843	18	6252.5	507
P47985	Cytochrome b-c1 complex subunit Rieske, mitochondrial OS=Homo sapiens GN=UQCRFS1 PE=1 SV=2	29.649	797.8	618.5	590.9	774.2	972.7	943.5	690.8	854.1	1.955	0	122.949	7	6242.5	508
P33121	Long-chain-fatty-acid--CoA ligase 1 OS=Homo sapiens GN=ACSL1 PE=1 SV=1	77.893	886	640.7	569	723.6	1252.1	861.5	604.8	700.7	1.154	0	284.464	13	6238.4	509
P32119	Peroxiredoxin-2 OS=Homo sapiens GN=PRDX2 PE=1 SV=5	21.878	623.3	548.6	756.8	968.3	821.3	840.3	754.6	921.7	13.678	0	346.38	8	6234.9	510
P24390	ER lumen protein-retaining receptor 1 OS=Homo sapiens GN=KDELR1 PE=1 SV=1	24.526	607.5	668	705.1	895.2	713.1	768.8	681.3	1188.2	6.743	0	419.748	4	6227.2	511
O60716	Catenin delta-1 OS=Homo sapiens GN=CTNND1 PE=1 SV=1	108.103	900.7	702.2	619.1	743.8	1148.4	810.1	609.5	680.9	0.76	0	201.561	13	6214.7	512
Q8NCA5	Protein FAM98A OS=Homo sapiens GN=FAM98A PE=1 SV=1	55.366	882.6	615.2	550	648.8	1377.9	860.3	574.8	702.8	1.424	1	293.093	9	6212.4	513
P30519	Heme oxygenase 2 OS=Homo sapiens GN=HMOX2 PE=1 SV=2	36.01	729.1	655.5	659.8	864.4	941.9	841	714.3	792.2	2.594	0	238.058	10	6198.2	514
Q13823	Nucleolar GTP-binding protein 2 OS=Homo sapiens GN=GNL2 PE=1 SV=1	83.603	943	629.1	538	650.5	1297.7	881.1	565.8	692.8	0.855	0	148.73	10	6198	515
Q15437	Protein transport protein Sec23B OS=Homo sapiens GN=SEC23B PE=1 SV=2	86.424	696.9	677.6	795.2	1032.2	825.2	772.8	641.4	751.4	1.075	3	322.419	12	6192.7	516
Q8WVX9	Fatty acyl-CoA reductase 1 OS=Homo sapiens GN=FAR1 PE=1 SV=1	59.319	780.3	627.6	607.8	816.7	999.3	840.7	665.1	839.1	1.943	0	328.599	12	6176.6	517
P41240	Tyrosine-protein kinase CSK OS=Homo sapiens GN=CSK PE=1 SV=1	50.672	694.9	643.7	711.6	952.7	830.6	801.2	703.6	815.5	2.039	0	346.66	11	6153.8	518
Q92544	Transmembrane 9 superfamily member 4 OS=Homo sapiens GN=TM9SF4 PE=1 SV=2	74.47	754.5	724.8	732.8	863.1	819.1	817	634	802.7	1.894	0	223.065	8	6148	519
H3BNX8	Cytochrome c oxidase subunit 5A, mitochondrial OS=Homo sapiens GN=COX5A PE=1 SV=1	17.224	702.5	586.3	626.7	757.1	822.6	1003.3	765.7	883.7	2.162	0	273.414	3	6147.9	520
P46013	Antigen KI-67 OS=Homo sapiens GN=MKI67 PE=1 SV=2	358.474	822.4	600.3	569.6	701.1	1115	877.9	658.7	771.9	0.245	0	312.87	19	6116.9	521
P52907	F-actin-capping protein subunit alpha-1 OS=Homo sapiens GN=CAPZA1 PE=1 SV=3	32.902	689.4	555.3	738.8	1014.7	815	737.3	702.5	853.9	9	1	559.913	10	6106.9	522
Q7L576	Cytoplasmic FMR1-interacting protein 1 OS=Homo sapiens GN=CYFIP1 PE=1 SV=1	145.089	703.3	599.8	695.4	950.8	841.8	802.1	697.6	809.1	0.674	3	303.722	14	6099.9	523
P33993	DNA replication licensing factor MCM7 OS=Homo sapiens GN=MCM7 PE=1 SV=4	81.257	854.3	630.2	630	767.7	1066	817.7	565.4	755.3	0.842	0	247.227	13	6086.6	524
H0YMV8	40S ribosomal protein S27 OS=Homo sapiens GN=RPS27L PE=1 SV=1	11.338	941.9	621.8	511	568.8	1300.2	901.3	578.2	654.8	3.642	0	284.912	2	6078	525
Q12893	Transmembrane protein 115 OS=Homo sapiens GN=TMEM115 PE=1 SV=1	38.172	749.1	696.9	715.5	810.2	879.2	824.5	638.9	754.2	3.642	0	322.38	6	6068.5	526
Q92615	La-related protein 4B OS=Homo sapiens GN=LARP4B PE=1 SV=3	80.503	789.5	598.7	588.9	731.3	1140.5	856.6	613.5	740.5	0.962	0	249.223	11	6059.5	527
O96000	NADH dehydrogenase [ubiquinone] 1 beta subcomplex subunit 10 OS=Homo sapiens GN=NDUFB10 PE=1 SV=3	20.763	722.8	600.3	591.2	804	855.9	944.2	714	825.5	7.254	0	273.246	9	6057.9	528
Q9Y4L1	Hypoxia up-regulated protein 1 OS=Homo sapiens GN=HYOU1 PE=1 SV=1	111.266	679.1	535	583.4	762.5	1117.2	912.4	661.8	805.2	0.468	0	129.25	9	6056.6	529
Q9GZR7	ATP-dependent RNA helicase DDX24 OS=Homo sapiens GN=DDX24 PE=1 SV=1	96.271	843.4	626.1	575.9	643.2	1217.8	853.1	585.3	707.5	0.859	0	334.697	14	6052.3	530
Q5JPC1	Putative uncharacterized protein DKFZp667O1614 OS=Homo sapiens GN=DKFZp667O1614 PE=2 SV=1	35.488	767	598.7	609.9	742	954.8	871.6	644.1	850.3	1.154	0	93.79	8	6038.4	531
O14925	Mitochondrial import inner membrane translocase subunit Tim23 OS=Homo sapiens GN=TIMM23 PE=1 SV=1	21.929	862.9	603.3	541.2	730.1	1071.8	861.7	632.6	725.1	2.511	0	241.114	5	6028.7	532
P31946	14-3-3 protein beta/alpha OS=Homo sapiens GN=YWHAB PE=1 SV=3	28.065	683.2	555.4	705.5	906.4	882.7	749.4	646.6	897.2	12.111	3	330.497	13	6026.4	533
J3KQ48	Peptidyl-tRNA hydrolase 2, mitochondrial OS=Homo sapiens GN=PTRH2 PE=1 SV=1	19.312	727.9	614.5	622.4	798.1	912.2	828.8	656.1	846.7	4.337	0	275.895	5	6006.7	534
Q6PGP7	Tetratricopeptide repeat protein 37 OS=Homo sapiens GN=TTC37 PE=1 SV=1	175.375	797	599.1	608.2	724.4	1138.7	870.3	574	680.5	0.362	0	233.805	11	5992.2	535
Q9Y2R0	Cytochrome c oxidase assembly factor 3 homolog, mitochondrial OS=Homo sapiens GN=COA3 PE=1 SV=1	11.724	763	583.9	561.1	739	905.1	927.8	681.4	819.3	5.813	0	216.425	3	5980.6	536
P12235	ADP/ATP translocase 1 OS=Homo sapiens GN=SLC25A4 PE=1 SV=4	33.043	804	560.7	568.6	706.5	1115.3	887.8	629.2	674.3	18.307	0	1280.05	16	5946.4	537
Q12797	Aspartyl/asparaginyl beta-hydroxylase OS=Homo sapiens GN=ASPH PE=1 SV=3	85.809	711.8	571.2	521.3	640.3	1101.4	929	661.9	785	1.482	0	337.265	14	5921.9	538
P56182	Ribosomal RNA processing protein 1 homolog A OS=Homo sapiens GN=RRP1 PE=1 SV=1	52.807	979	678.6	492.4	596.3	1213.9	787.2	517.9	633.3	1.346	0	132.45	10	5898.6	539
Q6PJG6	BRCA1-associated ATM activator 1 OS=Homo sapiens GN=BRAT1 PE=1 SV=2	88.063	731	607.7	626.4	825	903.5	775.6	643.4	764	0.616	0	213.368	10	5876.6	540
Q9Y265	RuvB-like 1 OS=Homo sapiens GN=RUVBL1 PE=1 SV=1	50.196	713.6	594.2	666	784.1	953.4	793.3	659.7	711.5	1.371	0	259.788	7	5875.8	541
P42345	Serine/threonine-protein kinase mTOR OS=Homo sapiens GN=MTOR PE=1 SV=1	288.707	743	622.8	583.1	777.6	1046.3	770.2	573.4	737.8	0.404	0	333.263	24	5854.2	542
Q9BUJ2	Heterogeneous nuclear ribonucleoprotein U-like protein 1 OS=Homo sapiens GN=HNRNPUL1 PE=1 SV=2	95.679	836.9	581.7	556.9	675.5	1152.2	826	547.8	677	1.085	0	218.04	12	5854	543
Q08170	Serine/arginine-rich splicing factor 4 OS=Homo sapiens GN=SRSF4 PE=1 SV=2	56.645	761.5	639.1	552.4	767.2	909.5	852.8	611.4	754.9	0.931	1	137.89	5	5848.8	544
Q9H857-2	Isoform 2 of 5'-nucleotidase domain-containing protein 2 OS=Homo sapiens GN=NT5DC2	64.103	703.9	570.2	638.5	837.4	919.1	764.2	622.2	783.1	1.154	0	112.078	11	5838.6	545
P09874	Poly [ADP-ribose] polymerase 1 OS=Homo sapiens GN=PARP1 PE=1 SV=4	113.012	609.5	535.5	635.7	934.2	844.8	811.9	623.4	836.8	0.795	0	325.731	15	5831.8	546
P98164	Low-density lipoprotein receptor-related protein 2 OS=Homo sapiens GN=LRP2 PE=1 SV=3	521.616	757.2	672.6	726.7	958.7	786.6	697.7	573.9	634.7	0.148	0	154.395	15	5808.1	547
Q8IYB5-2	Isoform 2 of Stromal membrane-associated protein 1 OS=Homo sapiens GN=SMAP1	47.579	646.4	585.9	704.5	921.6	762.9	739.5	630.1	816.5	2.831	0	193.89	6	5807.4	548
A0A087WU53	Magnesium transporter protein 1 OS=Homo sapiens GN=MAGT1 PE=1 SV=1	41.504	615.1	626.8	637.1	724.6	840.2	852.6	646.2	856.7	2.162	1	113.22	7	5799.3	549
Q99615	DnaJ homolog subfamily C member 7 OS=Homo sapiens GN=DNAJC7 PE=1 SV=2	56.405	738.1	568.4	661.6	862.4	869.3	780.7	607.2	704.6	1.11	0	168.48	11	5792.3	550
Q71RC2-4	Isoform 4 of La-related protein 4 OS=Homo sapiens GN=LARP4	81.193	739.2	573.3	569.9	671.9	1114.2	830.4	624.9	665	0.778	0	281.522	8	5788.8	551
P38606	V-type proton ATPase catalytic subunit A OS=Homo sapiens GN=ATP6V1A PE=1 SV=2	68.26	688.5	617.3	685.5	903.2	773.5	709.4	613.2	792.8	0.995	0	230.948	10	5783.4	552
O15067	Phosphoribosylformylglycinamidine synthase OS=Homo sapiens GN=PFAS PE=1 SV=4	144.643	703.4	592.4	700.9	893.6	806.7	731.7	586.5	754.3	0.396	0	187.51	9	5769.5	553
Q969N2	GPI transamidase component PIG-T OS=Homo sapiens GN=PIGT PE=1 SV=1	65.658	561.4	645	659.9	812.9	707.5	845.7	697.2	826.1	3.532	0	387.57	14	5755.7	554
P04183	Thymidine kinase, cytosolic OS=Homo sapiens GN=TK1 PE=1 SV=2	25.452	691.7	617.6	662.4	886.4	731.3	732.4	664	750.7	3.217	0	235.844	8	5736.5	555
P33992	DNA replication licensing factor MCM5 OS=Homo sapiens GN=MCM5 PE=1 SV=5	82.233	787.8	623.5	551.4	770.4	931.7	640.5	539.3	888.8	0.778	0	232.597	11	5733.4	556
P10620	Microsomal glutathione S-transferase 1 OS=Homo sapiens GN=MGST1 PE=1 SV=1	17.587	689.2	645.6	651.2	744.7	814.7	759.8	634.8	785.9	2.728	0	290.32	3	5725.9	557
P21333	Filamin-A OS=Homo sapiens GN=FLNA PE=1 SV=4	280.564	635.8	543.3	636.9	800.8	859.7	798.9	665.8	778.4	0.505	0	383.214	23	5719.6	558
Q8TED1	Probable glutathione peroxidase 8 OS=Homo sapiens GN=GPX8 PE=1 SV=2	23.866	625.6	574.1	661.7	758.6	762	834.8	675.7	809.9	1.894	0	114.353	5	5702.4	559
Q8N5M9	Protein jagunal homolog 1 OS=Homo sapiens GN=JAGN1 PE=1 SV=1	21.111	641.3	577	737	812.9	710.9	737.8	677.6	801.4	1.371	0	112.96	2	5695.9	560
Q8TAT6-2	Isoform 2 of Nuclear protein localization protein 4 homolog OS=Homo sapiens GN=NPLOC4	69.417	492.2	573.7	606.7	582.1	724.4	884.6	900.2	927.6	1.021	0	278.95	8	5691.5	561
Q9Y2A7-2	Isoform 2 of Nck-associated protein 1 OS=Homo sapiens GN=NCKAP1	129.433	661.9	562.6	619.6	838.8	824.9	765.6	629.8	774.5	0.501	0	107.79	10	5677.7	562
Q14444	Caprin-1 OS=Homo sapiens GN=CAPRIN1 PE=1 SV=2	78.318	790.5	618.3	629.9	694.1	1032.4	752.7	528.7	613.4	0.859	0	163.745	5	5660	563
Q13057-2	Isoform 2 of Bifunctional coenzyme A synthase OS=Homo sapiens GN=COASY	65.299	655.6	558.1	652.7	883.5	757.2	729.8	624.1	796	2.03	0	266.924	10	5657	564
P46060	Ran GTPase-activating protein 1 OS=Homo sapiens GN=RANGAP1 PE=1 SV=1	63.502	672.8	536.9	604.8	765.3	946.3	801.8	610.3	714.7	1.581	0	292.345	13	5652.9	565
O14548	Cytochrome c oxidase subunit 7A-related protein, mitochondrial OS=Homo sapiens GN=COX7A2L PE=1 SV=2	12.607	639.3	553.9	547.5	689.5	793.4	881.3	663.8	869.7	6.197	0	92.3	4	5638.4	566
P49915	GMP synthase [glutamine-hydrolyzing] OS=Homo sapiens GN=GMPS PE=1 SV=1	76.667	595.6	556.7	622.3	857.3	788.5	727.3	643.2	796.1	3.19	0	481.184	22	5587	567
Q9NVP1	ATP-dependent RNA helicase DDX18 OS=Homo sapiens GN=DDX18 PE=1 SV=2	75.359	779.2	590.3	457.1	607.2	1017.5	884.9	549.4	693.6	1.448	0	287.522	11	5579.2	568
Q5VV42	Threonylcarbamoyladenosine tRNA methylthiotransferase OS=Homo sapiens GN=CDKAL1 PE=1 SV=1	65.07	701.6	592	575.2	704.3	909.3	775.1	607.7	687.6	1.865	0	250.135	14	5552.8	569
B3KY60	cDNA FLJ16777 fis, clone BRHIP2029567, highly similar to Cell division cycle 5-like protein OS=Homo sapiens PE=2 SV=1	92.22	785.4	566.5	486.6	645.4	1066.5	811.7	547.5	640.4	0.945	0	316.94	13	5550	570
P26368	Splicing factor U2AF 65 kDa subunit OS=Homo sapiens GN=U2AF2 PE=1 SV=4	53.467	708.6	533.7	496.2	689.6	1002	794.3	555.9	759.6	1.994	0	171.989	9	5539.9	571
O14980	Exportin-1 OS=Homo sapiens GN=XPO1 PE=1 SV=1	123.306	626.1	524.5	627.3	870.3	743.6	739.7	627	752	0.796	0	271.745	14	5510.5	572
A0A0A0MR39	Myelin expression factor 2 OS=Homo sapiens GN=MYEF2 PE=1 SV=1	64.109	1029.3	564.9	408.8	448.3	1166	818.5	491.5	581.5	0.833	0	144.98	9	5508.8	573
P51617	Interleukin-1 receptor-associated kinase 1 OS=Homo sapiens GN=IRAK1 PE=1 SV=2	76.489	625.8	556.4	620.2	836.2	801	743.5	618.1	698.8	2.047	0	322.017	10	5500	574
Q9Y4P3	Transducin beta-like protein 2 OS=Homo sapiens GN=TBL2 PE=1 SV=1	49.766	659.8	522.4	514.5	614.8	899.1	790.3	641.2	838.2	1.829	0	279.94	9	5480.3	575
P38159	RNA-binding motif protein, X chromosome OS=Homo sapiens GN=RBMX PE=1 SV=3	42.306	762.4	664.7	446.9	823.4	759.1	851.7	511.3	639.8	0.748	0	198.064	6	5459.3	576
G8JLH6	Tetraspanin (Fragment) OS=Homo sapiens GN=CD9 PE=1 SV=1	25.391	584.1	585.8	628	773.4	716.7	725.2	633.8	807.2	3.642	0	188.755	4	5454.2	577
Q969S3	Zinc finger protein 622 OS=Homo sapiens GN=ZNF622 PE=1 SV=1	54.237	675.9	478.9	528.2	608.9	1187.6	740.8	554.1	676.9	2.29	0	186.27	13	5451.3	578
P55735-3	Isoform 3 of Protein SEC13 homolog OS=Homo sapiens GN=SEC13	40.721	702.9	494.1	588	654.8	1051.8	747.8	575.2	632.6	1.512	0	265.86	6	5447.2	579
O00170	AH receptor-interacting protein OS=Homo sapiens GN=AIP PE=1 SV=2	37.612	615.7	534.1	602.4	793.9	783.3	729.9	601.4	774.6	1.462	0	194.53	7	5435.3	580
Q9BZF1	Oxysterol-binding protein-related protein 8 OS=Homo sapiens GN=OSBPL8 PE=1 SV=3	101.132	650	547.7	580.8	753.7	836.6	734.9	612.2	709.8	0.389	0	182.92	7	5425.7	581
Q9BU76	Multiple myeloma tumor-associated protein 2 OS=Homo sapiens GN=MMTAG2 PE=1 SV=1	29.394	737.2	595.7	529.1	665	1005.8	704.2	492.2	676.4	1.581	0	90.6167	7	5405.6	582
D6R956	Ubiquitin carboxyl-terminal hydrolase OS=Homo sapiens GN=UCHL1 PE=1 SV=1	26.823	597.6	499.1	649.5	889.6	730.9	720.1	608.9	709	1.738	0	155.67	5	5404.7	583
Q5W0B1	RING finger protein 219 OS=Homo sapiens GN=RNF219 PE=1 SV=1	81.066	758	572.6	577.9	698.7	948.2	732.2	520.4	591.8	0.695	0	145.558	11	5399.8	584
E7EPT4	NADH dehydrogenase [ubiquinone] flavoprotein 2, mitochondrial OS=Homo sapiens GN=NDUFV2 PE=1 SV=1	27.889	551.3	536.6	505	661.6	710.6	898	686.9	848.7	2.384	0	217.112	6	5398.7	585
Q9NPH2	Inositol-3-phosphate synthase 1 OS=Homo sapiens GN=ISYNA1 PE=1 SV=1	61.029	608.6	571.3	619	810.6	789.1	670.1	549.8	769.9	0.905	0	157.62	5	5388.4	586
B3KMB1	Structural maintenance of chromosomes protein OS=Homo sapiens PE=2 SV=1	135.517	635.9	485.2	595.7	842.3	789.1	728.9	604.9	705.9	0.425	0	181.617	12	5387.9	587
P62318	Small nuclear ribonucleoprotein Sm D3 OS=Homo sapiens GN=SNRPD3 PE=1 SV=1	13.907	744.8	561.1	527.9	726	896.9	705.6	547.9	667.4	3.642	0	146.04	4	5377.6	588
Q96KA5	Cleft lip and palate transmembrane protein 1-like protein OS=Homo sapiens GN=CLPTM1L PE=1 SV=1	62.189	600.1	579.7	596.9	691.6	744.4	763	590.8	800.5	2.433	0	191.45	11	5367	589
B3KSL5	cDNA FLJ36545 fis, clone TRACH2006670, highly similar to RNA-binding protein Luc7-like 2 OS=Homo sapiens PE=2 SV=1	46.456	659.8	501.8	496.3	835.3	855.6	762.2	544.6	696.5	3.281	2	300.939	10	5352.1	590
Q7Z2T5	TRMT1-like protein OS=Homo sapiens GN=TRMT1L PE=1 SV=2	81.695	832.4	592.4	488.5	593.7	970.3	710.8	480.5	680.7	0.714	0	157.698	11	5349.3	591
O95674	Phosphatidate cytidylyltransferase 2 OS=Homo sapiens GN=CDS2 PE=1 SV=1	51.384	628.3	585.2	601.1	703.6	794	742.4	564.1	730.4	1.637	0	221.233	8	5349.1	592
P14854	Cytochrome c oxidase subunit 6B1 OS=Homo sapiens GN=COX6B1 PE=1 SV=2	10.186	579.5	536.9	481.3	630.3	814.2	901.7	627.7	771.1	9	0	229.7	5	5342.7	593
Q9Y2U8	Inner nuclear membrane protein Man1 OS=Homo sapiens GN=LEMD3 PE=1 SV=2	99.935	648.8	569.8	566.3	689.2	821.7	723.2	580.9	733.1	0.429	0	182.282	7	5333	594
O43242	26S proteasome non-ATPase regulatory subunit 3 OS=Homo sapiens GN=PSMD3 PE=1 SV=2	60.939	719.4	518.3	548.1	662.6	941.8	763.5	564.4	614.9	0.914	0	233.092	10	5333	595
O95249	Golgi SNAP receptor complex member 1 OS=Homo sapiens GN=GOSR1 PE=1 SV=1	28.595	674.1	646.1	620.8	715.9	757.6	738.7	542.8	616.9	1.239	0	197.79	6	5312.9	596
Q08380	Galectin-3-binding protein OS=Homo sapiens GN=LGALS3BP PE=1 SV=1	65.289	617.4	522.1	647.3	815.8	822.7	678	544.9	658.4	0.748	0	275.494	6	5306.6	597
Q9H3K2	Growth hormone-inducible transmembrane protein OS=Homo sapiens GN=GHITM PE=1 SV=2	37.181	657	558.9	547.8	664.7	753.5	815.1	589.2	715.9	0.968	0	118.645	4	5302.1	598
P53396	ATP-citrate synthase OS=Homo sapiens GN=ACLY PE=1 SV=3	120.762	610.4	546.9	584.1	792.9	761.7	710.3	559.9	732.5	1.204	0	267.934	20	5298.7	599
P30048	Thioredoxin-dependent peroxide reductase, mitochondrial OS=Homo sapiens GN=PRDX3 PE=1 SV=3	27.675	645.6	539.6	729.7	843.3	735.6	654.2	552.4	595.1	2.728	0	222.44	6	5295.5	600
Q14498	RNA-binding protein 39 OS=Homo sapiens GN=RBM39 PE=1 SV=2	59.343	706.9	532.1	428.6	710.6	1028.7	737	482	618.2	2.162	0	500.757	8	5244.1	601
Q5HYI8	Rab-like protein 3 OS=Homo sapiens GN=RABL3 PE=1 SV=1	26.407	631.5	617.1	627.6	723.1	753.7	711.6	532.3	646.7	1.512	0	265.12	5	5243.6	602
Q13148	TAR DNA-binding protein 43 OS=Homo sapiens GN=TARDBP PE=1 SV=1	44.711	706	552.6	486.1	674.2	865.4	715.3	534	702	1.976	0	227.16	7	5235.6	603
P55884-2	Isoform 2 of Eukaryotic translation initiation factor 3 subunit B OS=Homo sapiens GN=EIF3B	98.967	571.6	575.3	597	764.5	872.8	653.1	578	611.3	1.342	0	312.03	14	5223.6	604
P35610	Sterol O-acyltransferase 1 OS=Homo sapiens GN=SOAT1 PE=1 SV=3	64.692	584.6	541.7	552.7	680.8	659.6	769.7	603.9	786.1	0.638	0	101.09	5	5179.1	605
Q99442	Translocation protein SEC62 OS=Homo sapiens GN=SEC62 PE=1 SV=1	45.833	646.6	556	535.8	662.7	781.4	762.8	557.8	661.4	0.833	0	147.05	5	5164.5	606
O95292	Vesicle-associated membrane protein-associated protein B/C OS=Homo sapiens GN=VAPB PE=1 SV=3	27.211	590.1	557.6	582.7	648	756	725.2	565.7	720.1	2.652	0	153.11	8	5145.4	607
P07195	L-lactate dehydrogenase B chain OS=Homo sapiens GN=LDHB PE=1 SV=2	36.615	572.7	404.4	560.6	976	800.7	652.4	480.2	690.4	2.728	1	160.864	10	5137.4	608
Q9BV57	1,2-dihydroxy-3-keto-5-methylthiopentene dioxygenase OS=Homo sapiens GN=ADI1 PE=1 SV=1	21.485	555.6	464.1	595.2	832	627.9	682.5	623.1	753.5	1.424	0	119.74	5	5133.9	609
Q9HD42	Charged multivesicular body protein 1a OS=Homo sapiens GN=CHMP1A PE=1 SV=1	21.689	486.9	438	972.7	725.1	592.9	626.6	587.2	682.6	2.162	0	98.7943	5	5112	610
P23526	Adenosylhomocysteinase OS=Homo sapiens GN=AHCY PE=1 SV=4	47.685	607	527.5	581.4	757.7	699	692.6	568.5	674.1	1.291	0	195.689	7	5107.8	611
P23921	Ribonucleoside-diphosphate reductase large subunit OS=Homo sapiens GN=RRM1 PE=1 SV=1	90.013	638.1	524.6	522.5	790.3	721.4	679.4	534.5	682.4	1.512	0	375.237	15	5093.2	612
Q9Y4W2	Ribosomal biogenesis protein LAS1L OS=Homo sapiens GN=LAS1L PE=1 SV=2	83.013	673.7	547	490.8	632.3	911.8	707.8	509.1	619.4	0.802	0	201.56	9	5091.9	613
O75915	PRA1 family protein 3 OS=Homo sapiens GN=ARL6IP5 PE=1 SV=1	21.6	594.1	553.5	537.3	617.5	826.3	745.6	564.5	645.5	3.642	0	181.023	4	5084.3	614
B3KY94	CDP-diacylglycerol--inositol 3-phosphatidyltransferase OS=Homo sapiens GN=CDIPT PE=1 SV=1	25.929	565.4	569.1	510.3	661.1	704.4	713.4	575	781.9	3.642	0	185.021	4	5080.6	615
Q9UHB9	Signal recognition particle subunit SRP68 OS=Homo sapiens GN=SRP68 PE=1 SV=2	70.686	662.3	452.5	444.1	581.2	1028.9	748.4	516.7	625.5	1.006	0	236.583	13	5059.6	616
P08243	Asparagine synthetase [glutamine-hydrolyzing] OS=Homo sapiens GN=ASNS PE=1 SV=4	64.329	646.2	513.8	524.5	705.1	809.5	695.1	522.8	637.6	0.983	0	146.33	10	5054.6	617
Q96A33	Coiled-coil domain-containing protein 47 OS=Homo sapiens GN=CCDC47 PE=1 SV=1	55.838	645.6	515.6	520.2	617.1	826.2	691.1	543.3	693	0.65	0	80.85	5	5052.1	618
Q9NS69	Mitochondrial import receptor subunit TOM22 homolog OS=Homo sapiens GN=TOMM22 PE=1 SV=3	15.512	669.5	490.5	488.7	612.6	910.9	711	508.9	647.5	9	0	189.04	4	5039.6	619
Q9UI09	NADH dehydrogenase [ubiquinone] 1 alpha subcomplex subunit 12 OS=Homo sapiens GN=NDUFA12 PE=1 SV=1	17.104	575.6	491.7	474.6	614.4	730.2	809.6	612.5	725.1	5.31	0	156.4	6	5033.7	620
Q8N0X7	Spartin OS=Homo sapiens GN=SPG20 PE=1 SV=1	72.788	662.7	514.7	495.7	654	947.8	695.9	505	550.1	0.585	0	139.231	6	5025.9	621
O95816	BAG family molecular chaperone regulator 2 OS=Homo sapiens GN=BAG2 PE=1 SV=1	23.757	661.7	521.6	599.3	671.7	751.9	639.6	550.4	623.3	2.652	0	199.645	7	5019.5	622
Q3SXM5	Inactive hydroxysteroid dehydrogenase-like protein 1 OS=Homo sapiens GN=HSDL1 PE=1 SV=3	36.978	624.6	497.6	509.3	611	901.4	709.5	532.6	632.2	1.154	0	224.003	6	5018.2	623
Q969M3-3	Isoform 3 of Protein YIPF5 OS=Homo sapiens GN=YIPF5	29.088	563.9	562.4	545.6	635.5	735.9	745.6	597.4	629.5	9	0	216.4	2	5015.8	624
Q7Z2W4	Zinc finger CCCH-type antiviral protein 1 OS=Homo sapiens GN=ZC3HAV1 PE=1 SV=3	101.367	709.6	520.5	478.8	573	953.2	709.9	486.4	582.8	0.585	0	222.428	13	5014.2	625
Q16891	MICOS complex subunit MIC60 OS=Homo sapiens GN=IMMT PE=1 SV=1	83.626	542.8	435.5	517.1	656.3	713.1	740.9	589.3	792.9	0.544	0	159.392	10	4987.9	626
O14828	Secretory carrier-associated membrane protein 3 OS=Homo sapiens GN=SCAMP3 PE=1 SV=3	38.262	552.6	568.9	617	706.9	682.3	689.5	514.5	637.7	5.31	0	371.637	8	4969.4	627
P51571	Translocon-associated protein subunit delta OS=Homo sapiens GN=SSR4 PE=1 SV=1	18.987	525.4	482	477.4	608.8	750.7	740.2	629.1	754.3	2.162	0	201.743	2	4967.9	628
P43686	26S protease regulatory subunit 6B OS=Homo sapiens GN=PSMC4 PE=1 SV=2	47.337	563.6	476.2	557.3	697.9	765.1	708.5	562.1	631.6	0.738	0	151.835	6	4962.3	629
Q93050-3	Isoform 3 of V-type proton ATPase 116 kDa subunit a isoform 1 OS=Homo sapiens GN=ATP6V0A1	96.537	505	513.9	625.8	734.2	656	661.8	559	638.9	0.638	0	197.532	8	4894.6	630
Q07666	KH domain-containing, RNA-binding, signal transduction-associated protein 1 OS=Homo sapiens GN=KHDRBS1 PE=1 SV=1	48.197	716.3	545	474.8	612.7	901.6	612.8	431.1	580.4	1.873	0	129.561	10	4874.7	631
P84103	Serine/arginine-rich splicing factor 3 OS=Homo sapiens GN=SRSF3 PE=1 SV=1	19.318	712.5	548.4	423	610.3	809.1	696.2	439	619.4	2.981	0	188.682	4	4857.9	632
Q9Y4W6	AFG3-like protein 2 OS=Homo sapiens GN=AFG3L2 PE=1 SV=2	88.528	593.5	467.7	514.6	639.8	745.2	693.7	535.4	667.5	0.817	0	238.247	11	4857.4	633
Q9NVI1	Fanconi anemia group I protein OS=Homo sapiens GN=FANCI PE=1 SV=4	149.229	608.4	462	546.1	671.8	752.3	670.6	505.1	617.2	0.449	0	184.3	13	4833.5	634
Q8IV08	Phospholipase D3 OS=Homo sapiens GN=PLD3 PE=1 SV=1	54.671	588	558.6	499.2	570.9	762.4	717.5	544.1	567.5	1.31	0	163.697	8	4808.2	635
O95373	Importin-7 OS=Homo sapiens GN=IPO7 PE=1 SV=1	119.44	547	493	505.6	684.5	759.9	685.9	489.2	613.3	0.6	0	249.159	8	4778.4	636
P14927	Cytochrome b-c1 complex subunit 7 OS=Homo sapiens GN=UQCRB PE=1 SV=2	13.522	519.2	412.6	440.9	561.5	661.8	804.7	607.3	763.5	4.623	0	105.457	6	4771.5	637
Q8IWV8	E3 ubiquitin-protein ligase UBR2 OS=Homo sapiens GN=UBR2 PE=1 SV=1	200.408	650	512.2	506.1	606.2	875.3	633.3	473.4	506.1	0.181	0	46.37	7	4762.6	638
P07339	Cathepsin D OS=Homo sapiens GN=CTSD PE=1 SV=1	44.524	585.2	399.5	471.6	811.8	704.4	563.8	471.3	746.9	0.823	0	148.54	6	4754.5	639
Q8WWC4	Uncharacterized protein C2orf47, mitochondrial OS=Homo sapiens GN=C2orf47 PE=1 SV=1	32.524	690.2	483.2	454	535.6	900.8	669.5	475.6	529.6	0.65	0	85.49	4	4738.5	640
B3KNS8	cDNA FLJ30322 fis, clone BRACE2006703, highly similar to Surfeit locus protein 6 OS=Homo sapiens PE=2 SV=1	41.484	798.7	505.8	328	410.1	1043.1	667.2	442.7	534	1.976	0	180.305	8	4729.6	641
O43920	NADH dehydrogenase [ubiquinone] iron-sulfur protein 5 OS=Homo sapiens GN=NDUFS5 PE=1 SV=3	12.509	509.3	461	459.1	594.7	678.9	740.7	585.6	699.7	4.179	0	160.43	4	4729	642
Q9UG63-2	Isoform 2 of ATP-binding cassette sub-family F member 2 OS=Homo sapiens GN=ABCF2	72.397	557.5	398.4	410.2	495.1	987.3	675.3	480.8	719.8	0.725	0	234.96	8	4724.4	643
Q13617-2	Isoform 2 of Cullin-2 OS=Homo sapiens GN=CUL2	89.434	495.7	467.7	479.5	702.2	612	597.5	520.1	846.4	0.643	0	201.216	11	4721.1	644
P54709	Sodium/potassium-transporting ATPase subunit beta-3 OS=Homo sapiens GN=ATP1B3 PE=1 SV=1	31.492	545.3	475	551.5	702.9	673.1	651.2	513.4	602.9	2.981	0	142.84	6	4715.3	645
P47914	60S ribosomal protein L29 OS=Homo sapiens GN=RPL29 PE=1 SV=2	17.741	689.4	499.9	395.1	478.7	948.7	677.8	459	551.3	13.678	0	223.692	3	4699.9	646
P23258	Tubulin gamma-1 chain OS=Homo sapiens GN=TUBG1 PE=1 SV=2	51.138	622.4	488.1	503.5	607.5	833.9	658.5	465	497.1	1.31	0	315.097	8	4676	647
Q9BPU6	Dihydropyrimidinase-related protein 5 OS=Homo sapiens GN=DPYSL5 PE=1 SV=1	61.382	608.2	552.8	367	760.4	633.5	670.1	445.9	637.7	0.403	0	73.2	5	4675.6	648
Q9NUP9	Protein lin-7 homolog C OS=Homo sapiens GN=LIN7C PE=1 SV=1	21.82	477.9	448.3	501.3	689.6	611.5	635.2	560.2	748.9	1.512	2	40.15	6	4672.9	649
O14949	Cytochrome b-c1 complex subunit 8 OS=Homo sapiens GN=UQCRQ PE=1 SV=4	9.9	535.9	450.7	426.8	565	683.6	778	523.8	700.2	5.813	0	94.91	4	4664	650
Q8TDD1-2	Isoform 2 of ATP-dependent RNA helicase DDX54 OS=Homo sapiens GN=DDX54	98.605	693.8	468.5	441.1	527.4	890.3	658.3	455.4	525.6	0.759	0	141.98	13	4660.4	651
Q9BV81	ER membrane protein complex subunit 6 OS=Homo sapiens GN=EMC6 PE=1 SV=1	12.01	503.6	497.2	484.5	619.9	668.7	652.4	553.7	675.5	1.512	0	130.76	2	4655.5	652
P13010	X-ray repair cross-complementing protein 5 OS=Homo sapiens GN=XRCC5 PE=1 SV=3	82.652	543.8	480.5	448.5	604.2	790.7	654.8	504.3	626.1	0.945	0	387.58	12	4652.9	653
O96011	Peroxisomal membrane protein 11B OS=Homo sapiens GN=PEX11B PE=1 SV=1	28.413	510.1	425.5	438.5	568.5	787.6	717.5	484.9	720.1	0.896	0	65.63	5	4652.7	654
P56134	ATP synthase subunit f, mitochondrial OS=Homo sapiens GN=ATP5J2 PE=1 SV=3	10.911	634.6	471.9	458.5	569.8	867	693.5	480.6	452.4	16.783	0	135.38	3	4628.3	655
P53985	Monocarboxylate transporter 1 OS=Homo sapiens GN=SLC16A1 PE=1 SV=3	53.909	562.7	536.7	540.5	648.4	755.9	600.9	460.4	520.5	4.08	0	276.379	8	4626	656
Q9UNQ2	Probable dimethyladenosine transferase OS=Homo sapiens GN=DIMT1 PE=1 SV=1	35.214	649.3	519.2	516.5	628.7	748.6	576.3	490	490.8	1.015	0	86.9496	7	4619.4	657
Q9UBV8	Peflin OS=Homo sapiens GN=PEF1 PE=1 SV=1	30.361	592.2	394.9	465.3	767.1	694.1	503.1	476.9	674.8	1.512	0	126.003	3	4568.4	658
Q92522	Histone H1x OS=Homo sapiens GN=H1FX PE=1 SV=1	22.474	731.6	459.8	326.9	506.4	979.8	592.7	405.3	546.6	4.179	0	383.53	7	4549.1	659
Q13576	Ras GTPase-activating-like protein IQGAP2 OS=Homo sapiens GN=IQGAP2 PE=1 SV=4	180.465	637.2	491.9	494	552	808.9	630.9	432.6	500.9	0.549	0	317.073	16	4548.4	660
Q9NPA0	ER membrane protein complex subunit 7 OS=Homo sapiens GN=EMC7 PE=1 SV=1	26.454	457.7	470.2	481.6	577.5	580.9	673.6	572.1	700.5	1.424	0	96.22	4	4514.1	661
P47755	F-actin-capping protein subunit alpha-2 OS=Homo sapiens GN=CAPZA2 PE=1 SV=3	32.929	527.4	447.8	487.3	669.3	677.6	603.6	514.4	577.9	4.412	0	300.346	8	4505.3	662
Q96AB3-2	Isoform 2 of Isochorismatase domain-containing protein 2 OS=Homo sapiens GN=ISOC2	24.082	521.9	434.3	483.5	659	603.1	596.4	524.7	680.3	1.848	0	139.946	3	4503.2	663
Q9H089	Large subunit GTPase 1 homolog OS=Homo sapiens GN=LSG1 PE=1 SV=2	75.178	523.8	468	464.7	512	778.8	658.4	495	600.6	0.52	0	125.919	7	4501.3	664
Q01813	ATP-dependent 6-phosphofructokinase, platelet type OS=Homo sapiens GN=PFKP PE=1 SV=2	85.542	643.9	449.4	515.9	552.8	792.9	597	426.6	520.6	1.04	0	343.713	11	4499.1	665
Q15370-2	Isoform 2 of Transcription elongation factor B polypeptide 2 OS=Homo sapiens GN=TCEB2	17.9	494.6	416.3	496.3	621.8	615.2	581.3	528.6	735.3	3.642	0	144.178	6	4489.4	666
G3V3G9	Uncharacterized protein OS=Homo sapiens PE=4 SV=1	84.7	658.7	496.2	470.2	494.6	837.6	586	434.5	491.5	0.901	0	261.905	10	4469.3	667
P78406	mRNA export factor OS=Homo sapiens GN=RAE1 PE=1 SV=1	40.942	719.9	470.5	393.6	492.5	826.5	628.5	392.4	539.9	0.874	0	86.74	5	4463.8	668
Q9BYN8	28S ribosomal protein S26, mitochondrial OS=Homo sapiens GN=MRPS26 PE=1 SV=1	24.197	638.9	429.1	391	542	888.5	624.2	432.5	512.7	1.929	0	139.929	6	4458.9	669
H0Y362	Zinc transporter 7 (Fragment) OS=Homo sapiens GN=SLC30A7 PE=1 SV=2	9.942	529.7	555.6	586.5	699.3	595.4	554.4	443.5	484.5	2.162	0	72.38	2	4448.9	670
Q9NZW5	MAGUK p55 subfamily member 6 OS=Homo sapiens GN=MPP6 PE=1 SV=2	61.079	513.8	424.9	484.9	692.4	605.8	579.1	495.4	644.6	1.031	1	187.592	11	4440.9	671
P56381	ATP synthase subunit epsilon, mitochondrial OS=Homo sapiens GN=ATP5E PE=1 SV=2	5.776	679.3	546.3	465.8	403.8	877.3	707.4	323.2	435.2	4.623	0	57.9167	2	4438.3	672
J9JIE6	Transmembrane and coiled-coil domain-containing protein 1 OS=Homo sapiens GN=TMCO1 PE=1 SV=1	27.061	524.8	471.9	473.5	600.7	634.3	621.9	472	609.3	1.848	0	182.086	3	4408.4	673
B4DUT8	Calponin OS=Homo sapiens GN=CNN2 PE=1 SV=1	35.92	528.4	481.3	516.1	788.4	541.4	530.4	444.4	577	2.36	1	122.094	7	4407.4	674
Q5SRN5	HLA class I histocompatibility antigen, A-3 alpha chain OS=Homo sapiens GN=HLA-A PE=1 SV=2	41.342	512.5	464.4	550	818.2	554.1	534.2	459.9	512	2.008	1	419.203	7	4405.3	675
P51991	Heterogeneous nuclear ribonucleoprotein A3 OS=Homo sapiens GN=HNRNPA3 PE=1 SV=2	39.571	540.5	447.9	378	625.8	613.3	664	464.5	651.6	2.548	0	191.719	7	4385.6	676
A0A087WT23	UBX domain-containing protein 8 OS=Homo sapiens GN=UBXN8 PE=1 SV=1	35.162	419.7	452.2	419.5	410.1	657.7	793.9	605.2	623.7	1.336	0	190.553	5	4382	677
Q9NWM8	Peptidyl-prolyl cis-trans isomerase FKBP14 OS=Homo sapiens GN=FKBP14 PE=1 SV=1	24.156	442.4	412.8	402.3	544.7	663.3	610.9	517.1	763.2	1.154	0	138.58	3	4356.7	678
O95163	Elongator complex protein 1 OS=Homo sapiens GN=IKBKAP PE=1 SV=3	150.159	528.5	439.3	477.6	637.6	659.4	597.6	488.9	513.6	0.389	0	199.77	9	4342.5	679
Q8N0U8	Vitamin K epoxide reductase complex subunit 1-like protein 1 OS=Homo sapiens GN=VKORC1L1 PE=1 SV=2	19.823	459.8	496.6	491.3	566.4	563.1	582.1	521	642.3	4.179	0	95.03	3	4322.6	680
Q15233	Non-POU domain-containing octamer-binding protein OS=Homo sapiens GN=NONO PE=1 SV=4	54.197	554.9	419.6	448.2	610.4	733.4	583.1	435.7	533.5	1.913	1	223.929	10	4318.8	681
P49411	Elongation factor Tu, mitochondrial OS=Homo sapiens GN=TUFM PE=1 SV=2	49.51	621.6	411.8	401.9	608	821.8	606.5	366.1	475.4	1.371	0	169.72	10	4313.1	682
Q8NE71	ATP-binding cassette sub-family F member 1 OS=Homo sapiens GN=ABCF1 PE=1 SV=2	95.866	509.8	417.6	471.4	647.4	619.4	578.9	490.3	572.4	0.409	0	136.401	7	4307.2	683
Q06124	Tyrosine-protein phosphatase non-receptor type 11 OS=Homo sapiens GN=PTPN11 PE=1 SV=2	68.393	528.4	403.8	506.6	588.8	681	604.7	448.3	544.1	0.828	0	92.0833	11	4305.7	684
Q9UPY3	Endoribonuclease Dicer OS=Homo sapiens GN=DICER1 PE=1 SV=3	218.542	582.4	444.1	433.9	512.7	795.2	580.1	407	548.6	0.213	0	133.43	10	4304	685
Q8NBJ4	Golgi membrane protein 1 OS=Homo sapiens GN=GOLM1 PE=1 SV=1	45.306	576.4	547.6	532	531	633.7	579.9	429.6	462.2	1.154	0	192.14	9	4292.4	686
P30876	DNA-directed RNA polymerase II subunit RPB2 OS=Homo sapiens GN=POLR2B PE=1 SV=1	133.811	540.1	402.4	438.3	590.6	675.1	571.9	463.7	609.8	0.507	0	126.85	12	4291.9	687
P26641	Elongation factor 1-gamma OS=Homo sapiens GN=EEF1G PE=1 SV=3	50.087	497.7	428.8	395.2	766	662.1	473.8	423.5	634.3	4.179	0	258.687	15	4281.4	688
Q8NBM4	Ubiquitin-associated domain-containing protein 2 OS=Homo sapiens GN=UBAC2 PE=1 SV=1	38.938	466.9	429.6	445.6	548.8	604.1	619.1	538.1	628.7	1.239	0	221.695	6	4280.9	689
P30825	High affinity cationic amino acid transporter 1 OS=Homo sapiens GN=SLC7A1 PE=1 SV=1	67.594	520.1	461.5	502.6	628.1	577.2	554.6	453.9	574.5	0.859	0	192.414	6	4272.5	690
O94874	E3 UFM1-protein ligase 1 OS=Homo sapiens GN=UFL1 PE=1 SV=2	89.54	436.8	422.9	457.6	601.9	587.5	585.8	518.1	649.7	0.778	0	183.883	12	4260.3	691
O43396	Thioredoxin-like protein 1 OS=Homo sapiens GN=TXNL1 PE=1 SV=3	32.231	471.6	419.3	458.4	655.3	596.4	557.2	473.8	599.5	4.623	0	266.45	8	4231.5	692
Q9Y2X3	Nucleolar protein 58 OS=Homo sapiens GN=NOP58 PE=1 SV=1	59.541	589.2	428.7	370.1	540.2	704.3	627.9	438.5	530.1	1.154	0	234.818	9	4229	693
P60228	Eukaryotic translation initiation factor 3 subunit E OS=Homo sapiens GN=EIF3E PE=1 SV=1	52.187	613.9	436.6	428	479	836.9	585.2	400.2	445	2.162	0	305.485	14	4224.8	694
Q6PID8	Kelch domain-containing protein 10 OS=Homo sapiens GN=KLHDC10 PE=1 SV=1	49.067	411.7	380.9	394.7	557.7	604.3	557.3	479.2	833.5	0.445	0	56.87	4	4219.3	695
Q9NYL4	Peptidyl-prolyl cis-trans isomerase FKBP11 OS=Homo sapiens GN=FKBP11 PE=1 SV=1	22.166	526.6	437.8	409.4	499	713	614	472.5	544.3	1.512	0	81.35	3	4216.6	696
P53999	Activated RNA polymerase II transcriptional coactivator p15 OS=Homo sapiens GN=SUB1 PE=1 SV=3	14.386	464.8	378	415.4	1078.2	520.2	454.1	374.8	530.3	4.012	0	196.37	5	4215.8	697
Q9BRK5	45 kDa calcium-binding protein OS=Homo sapiens GN=SDF4 PE=1 SV=1	41.78	308	455.5	724.9	852.3	457.4	433.3	412.2	540.8	1.994	0	216.575	9	4184.4	698
Q6ZRP7	Sulfhydryl oxidase 2 OS=Homo sapiens GN=QSOX2 PE=1 SV=3	77.48	500.2	448.3	492.9	563.9	617.7	555.7	450.8	540.7	0.734	0	247.666	10	4170.2	699
O15321	Transmembrane 9 superfamily member 1 OS=Homo sapiens GN=TM9SF1 PE=2 SV=2	68.816	539.8	535.2	501.5	690.6	541.5	501.8	382	462.4	1.346	0	157.739	8	4154.8	700
F8W7C6	60S ribosomal protein L10 OS=Homo sapiens GN=RPL10 PE=1 SV=2	18.553	562.1	420.5	357.4	383.2	904.5	630	423.9	471.5	250.189	0	1300.27	10	4153.1	701
P50991	T-complex protein 1 subunit delta OS=Homo sapiens GN=CCT4 PE=1 SV=4	57.888	458.7	394.9	474.6	640.1	576.6	567	482.5	552.3	0.833	0	261.115	9	4146.7	702
Q9H936	Mitochondrial glutamate carrier 1 OS=Homo sapiens GN=SLC25A22 PE=1 SV=1	34.448	537.7	397	368.5	470.4	740.8	610.5	450.1	554.1	0.896	0	147.07	4	4129.1	703
O43813	LanC-like protein 1 OS=Homo sapiens GN=LANCL1 PE=1 SV=1	45.254	453.7	386.1	461.1	684.9	551.9	533.2	451	606.1	0.688	0	119.393	5	4128	704
Q6Y1H2	Very-long-chain (3R)-3-hydroxyacyl-CoA dehydratase 2 OS=Homo sapiens GN=HACD2 PE=1 SV=1	28.35	465.3	473.9	447.8	561.2	593.6	551.7	439	583.4	1.031	0	228.679	3	4115.9	705
A2A2G4	Dolichyl pyrophosphate Man9GlcNAc2 alpha-1,3-glucosyltransferase OS=Homo sapiens GN=ALG6 PE=1 SV=1	58.309	481	461.5	445.1	545.5	588.9	554.4	472.6	564.8	0.468	0	84.64	4	4113.8	706
P33316	Deoxyuridine 5'-triphosphate nucleotidohydrolase, mitochondrial OS=Homo sapiens GN=DUT PE=1 SV=4	26.547	468.9	441.8	522.9	691.4	501.3	493.1	419	574.3	2.384	0	283.12	6	4112.7	707
Q5BJF2	Transmembrane protein 97 OS=Homo sapiens GN=TMEM97 PE=1 SV=1	20.834	473	455.4	454	555.5	587	568.8	465.9	545.7	2.162	0	75.24	4	4105.3	708
Q96IX5	Up-regulated during skeletal muscle growth protein 5 OS=Homo sapiens GN=USMG5 PE=1 SV=1	6.453	592.2	409.3	419.9	528.9	745.9	573.5	390	438.8	20.544	0	242.78	2	4098.5	709
Q15904	V-type proton ATPase subunit S1 OS=Homo sapiens GN=ATP6AP1 PE=1 SV=2	51.993	461	462	504.3	624.3	560.7	520.5	434.6	531	0.616	0	119.56	5	4098.4	710
P15954	Cytochrome c oxidase subunit 7C, mitochondrial OS=Homo sapiens GN=COX7C PE=1 SV=1	7.241	484.5	404.8	372.6	512.3	529.5	661.2	495.8	636	5.813	0	136.449	2	4096.7	711
O15270	Serine palmitoyltransferase 2 OS=Homo sapiens GN=SPTLC2 PE=1 SV=1	62.884	508.3	458.7	448.7	508.6	685.7	595.3	416.8	472.1	0.778	0	199.91	9	4094.2	712
Q14232	Translation initiation factor eIF-2B subunit alpha OS=Homo sapiens GN=EIF2B1 PE=1 SV=1	33.691	468.2	398.6	447.1	615.2	586.3	532.3	465	579.3	1.783	0	170.895	8	4092	713
P22314	Ubiquitin-like modifier-activating enzyme 1 OS=Homo sapiens GN=UBA1 PE=1 SV=3	117.774	462.1	428.1	449.2	608.1	586.9	536.1	443.8	573.1	0.468	0	262.053	10	4087.4	714
Q15436	Protein transport protein Sec23A OS=Homo sapiens GN=SEC23A PE=1 SV=2	86.105	445.4	479.9	509.2	648.3	556.8	495.7	404.9	544.3	1.04	0	347.143	12	4084.5	715
B5ME19	Eukaryotic translation initiation factor 3 subunit C-like protein OS=Homo sapiens GN=EIF3CL PE=3 SV=1	105.407	495.7	376.6	449.3	550.2	662	546.7	430.8	571.9	0.616	0	196.17	9	4083.2	716
Q6IAN0	Dehydrogenase/reductase SDR family member 7B OS=Homo sapiens GN=DHRS7B PE=1 SV=2	35.097	506	420.1	422	544.2	650.1	577.1	438.4	523	1.154	0	200.52	5	4080.9	717
Q13547	Histone deacetylase 1 OS=Homo sapiens GN=HDAC1 PE=1 SV=1	55.068	571.3	386.8	456.5	562.8	702.1	537	404.1	455.8	0.887	2	122.46	7	4076.4	718
B0QY89	Eukaryotic translation initiation factor 3 subunit L OS=Homo sapiens GN=EIF3L PE=1 SV=1	70.857	492	369.9	458	554.5	676	553.5	456.3	507.3	0.63	0	111.593	7	4067.5	719
Q9UNF1	Melanoma-associated antigen D2 OS=Homo sapiens GN=MAGED2 PE=1 SV=2	64.914	520.7	399.1	420.8	489.2	796.6	563.9	398.1	459.8	0.585	0	116.535	7	4048.2	720
Q96E22	Dehydrodolichyl diphosphate synthase complex subunit NUS1 OS=Homo sapiens GN=NUS1 PE=1 SV=1	33.203	502	454	407.8	473.2	701.1	575	435.8	497.7	0.968	0	120.3	4	4046.6	721
Q13724	Mannosyl-oligosaccharide glucosidase OS=Homo sapiens GN=MOGS PE=1 SV=5	91.861	484.8	477.2	455.8	490.2	639.5	585.5	444.3	461.7	0.756	0	333.639	9	4039	722
Q8TEM1	Nuclear pore membrane glycoprotein 210 OS=Homo sapiens GN=NUP210 PE=1 SV=3	204.983	460.4	417.7	446.5	573	611.8	551.5	436	541.2	0.543	0	258.223	14	4038.1	723
O43819	Protein SCO2 homolog, mitochondrial OS=Homo sapiens GN=SCO2 PE=1 SV=3	29.791	570.1	431	397.9	521.1	672.5	517.6	368.5	543.7	1.637	0	118.756	5	4022.4	724
Q5SRQ6	Casein kinase II subunit beta OS=Homo sapiens GN=CSNK2B PE=1 SV=2	26.908	535.7	399.6	449.2	540.3	620.2	526.2	425.7	517.1	1.424	0	177.52	5	4014	725
Q9UBB6-3	Isoform 3 of Neurochondrin OS=Homo sapiens GN=NCDN	79.107	503.5	395.4	417.5	582.5	620.5	540.4	431.6	522.2	0.884	0	154.11	9	4013.6	726
Q15738	Sterol-4-alpha-carboxylate 3-dehydrogenase, decarboxylating OS=Homo sapiens GN=NSDHL PE=1 SV=2	41.874	473.1	412.3	424	503.4	680.7	575.5	411.1	517.6	1.424	0	222.63	8	3997.7	727
P35579	Myosin-9 OS=Homo sapiens GN=MYH9 PE=1 SV=4	226.392	482	367.1	455.7	560.7	627.4	545.9	424.3	519.6	0.284	0	296.402	14	3982.7	728
Q6NXT4-2	Isoform 2 of Zinc transporter 6 OS=Homo sapiens GN=SLC30A6	55.759	605.4	620.2	533	561	497.5	438.1	341.1	385.7	0.65	0	101.65	5	3982	729
P51116	Fragile X mental retardation syndrome-related protein 2 OS=Homo sapiens GN=FXR2 PE=1 SV=2	74.178	469.8	390.6	417.2	556.5	665.7	536.2	426.8	508	0.299	1	79.13	5	3970.8	730
P55795	Heterogeneous nuclear ribonucleoprotein H2 OS=Homo sapiens GN=HNRNPH2 PE=1 SV=1	49.232	536.8	389.5	387.7	471.1	757.9	559.2	391.9	451.9	7.318	0	852.403	11	3946	731
Q9HDC9	Adipocyte plasma membrane-associated protein OS=Homo sapiens GN=APMAP PE=1 SV=2	46.451	482.1	398.6	408	476	656.3	587.5	421.5	511.7	1.371	0	219.534	9	3941.7	732
Q9Y320	Thioredoxin-related transmembrane protein 2 OS=Homo sapiens GN=TMX2 PE=1 SV=1	34.016	487.4	407	418.8	456.8	648.5	553.2	407.8	558.8	3.084	0	265.076	9	3938.3	733
Q9P003	Protein cornichon homolog 4 OS=Homo sapiens GN=CNIH4 PE=1 SV=1	16.082	432.3	383.5	457.4	555.9	580.5	564.2	456.4	490.1	9	0	393.923	1	3920.3	734
A0A087WZN1	Isocitrate dehydrogenase [NAD] subunit, mitochondrial OS=Homo sapiens GN=IDH3B PE=1 SV=1	42.384	509.6	401.1	438	618.5	528.6	498.7	430.5	491.9	1.721	0	219.824	9	3916.9	735
Q9BV44	THUMP domain-containing protein 3 OS=Homo sapiens GN=THUMPD3 PE=1 SV=1	56.967	487.5	388.1	419.8	561.7	651.3	526	389	484.6	0.45	0	94.41	5	3908	736
Q9HCU5	Prolactin regulatory element-binding protein OS=Homo sapiens GN=PREB PE=1 SV=2	45.44	444.1	409	413	506.9	605.4	563.7	444.2	517.8	2.008	0	278.584	10	3904.1	737
A0FGR8-2	Isoform 2 of Extended synaptotagmin-2 OS=Homo sapiens GN=ESYT2	98.84	495.6	456.1	407.5	460.3	578.3	647.3	385.6	473.3	0.978	0	258.677	15	3904	738
A0A0A0MST0	Myeloid differentiation primary response protein MyD88 OS=Homo sapiens GN=MYD88 PE=1 SV=1	35.421	428.4	380.9	434	560.5	564.7	530.1	460.9	543.6	0.833	0	137.26	5	3903.1	739
H0Y886	NADH dehydrogenase [ubiquinone] 1 beta subcomplex subunit 5, mitochondrial (Fragment) OS=Homo sapiens GN=NDUFB5 PE=1 SV=1	23.529	416.3	400.3	389.5	514.9	467.1	610.9	487.5	596.3	3.924	0	148.007	5	3882.8	740
O94903	Proline synthase co-transcribed bacterial homolog protein OS=Homo sapiens GN=PROSC PE=1 SV=1	30.325	489.3	426.3	542.6	761.7	388.7	406.2	371.9	492.6	2.162	0	214.618	6	3879.3	741
Q96L58	Beta-1,3-galactosyltransferase 6 OS=Homo sapiens GN=B3GALT6 PE=1 SV=2	37.114	432.1	442.3	449.3	614.3	533.2	475.6	409.8	520.2	0.551	0	97.08	4	3876.8	742
Q92900	Regulator of nonsense transcripts 1 OS=Homo sapiens GN=UPF1 PE=1 SV=2	124.267	490.6	395.5	421.6	503.4	681.3	540.8	383.1	459.4	0.682	0	187.607	14	3875.7	743
O00165-2	Isoform 2 of HCLS1-associated protein X-1 OS=Homo sapiens GN=HAX1	32.398	534	405.6	412.3	511	679.4	505.6	374.6	450.5	2.793	0	164.845	9	3873	744
O95336	6-phosphogluconolactonase OS=Homo sapiens GN=PGLS PE=1 SV=2	27.53	431.6	392.7	436.9	556.1	538.4	509.5	444.6	547.9	2.415	0	192.491	6	3857.7	745
Q6NUK1	Calcium-binding mitochondrial carrier protein SCaMC-1 OS=Homo sapiens GN=SLC25A24 PE=1 SV=2	53.32	528.4	364.4	346.9	497.8	656.5	555.6	417	484.5	1.154	0	209.648	8	3851.1	746
P05556	Integrin beta-1 OS=Homo sapiens GN=ITGB1 PE=1 SV=2	88.357	442.6	439.5	466	575	507.9	508.1	401.8	495.8	1.239	0	190.662	12	3836.7	747
P48651	Phosphatidylserine synthase 1 OS=Homo sapiens GN=PTDSS1 PE=1 SV=1	55.491	422.2	387.6	367	473.5	572.1	545.1	490.8	574	0.823	0	240.407	4	3832.3	748
P07099	Epoxide hydrolase 1 OS=Homo sapiens GN=EPHX1 PE=1 SV=1	52.915	478.2	424.8	427.2	534.1	550.9	514.2	400.2	500.7	1.424	0	191.732	8	3830.3	749
Q96KR1	Zinc finger RNA-binding protein OS=Homo sapiens GN=ZFR PE=1 SV=2	116.939	602.8	404	319.6	397.7	730.2	533.7	374.5	456.8	1.024	0	256.667	14	3819.3	750
Q15125	3-beta-hydroxysteroid-Delta(8),Delta(7)-isomerase OS=Homo sapiens GN=EBP PE=1 SV=3	26.336	436.3	409	420	515	489.8	527.5	446.8	547.2	1.371	0	36.15	2	3791.6	751
Q9Y277-2	Isoform 2 of Voltage-dependent anion-selective channel protein 3 OS=Homo sapiens GN=VDAC3	30.77	442.9	412.2	426.4	550.1	491.7	535.6	384	547.6	2.36	0	309.29	6	3790.5	752
Q9P0J0-2	Isoform 2 of NADH dehydrogenase [ubiquinone] 1 alpha subcomplex subunit 13 OS=Homo sapiens GN=NDUFA13	24.866	458.5	370.3	361.1	418	576.2	608.1	446.5	543	1.424	0	129.37	4	3781.7	753
P51648-2	Isoform 2 of Fatty aldehyde dehydrogenase OS=Homo sapiens GN=ALDH3A2	57.633	477.9	394.2	409.9	486	590.5	519.8	420.9	477.7	0.859	0	161.817	6	3776.9	754
A0A0G2JMZ8	Occludin OS=Homo sapiens GN=OCLN PE=1 SV=1	59.092	458.9	469.9	426.9	490.3	576.6	516.8	396.6	436.1	2.793	0	313.34	10	3772.1	755
Q9UNK0	Syntaxin-8 OS=Homo sapiens GN=STX8 PE=1 SV=2	26.89	429.6	394.9	418.6	493.1	603.4	527.2	416	482	0.931	0	103.39	4	3764.8	756
O95070	Protein YIF1A OS=Homo sapiens GN=YIF1A PE=1 SV=2	31.991	414.4	411.4	419.6	493.8	571.2	511.9	428.3	500.5	4.337	0	325.08	4	3751.1	757
O43676	NADH dehydrogenase [ubiquinone] 1 beta subcomplex subunit 3 OS=Homo sapiens GN=NDUFB3 PE=1 SV=3	11.395	447.2	386	353.5	457	538.5	575.5	462.4	518.9	3.642	0	71.85	3	3739	758
P04350	Tubulin beta-4A chain OS=Homo sapiens GN=TUBB4A PE=1 SV=2	49.554	563.5	367.2	364.7	397.7	759.9	521.4	335.4	402.1	2014.34	0	6581.44	21	3711.9	759
Q5SNT2	Transmembrane protein 201 OS=Homo sapiens GN=TMEM201 PE=1 SV=1	72.19	436.7	382.2	412.5	481.9	592.3	512.2	394.2	483.1	0.682	0	115.513	7	3695.1	760
Q9NVN8	Guanine nucleotide-binding protein-like 3-like protein OS=Homo sapiens GN=GNL3L PE=1 SV=1	65.532	507.3	370.2	355.2	412.4	782.1	484.9	344.5	418.6	0.947	0	238.47	9	3675.2	761
Q6R327-3	Isoform 3 of Rapamycin-insensitive companion of mTOR OS=Homo sapiens GN=RICTOR	194.888	504.5	388.4	397.5	462.6	654.9	494	362.4	410.6	0.144	0	96.95	5	3674.9	762
P31040	Succinate dehydrogenase [ubiquinone] flavoprotein subunit, mitochondrial OS=Homo sapiens GN=SDHA PE=1 SV=2	72.645	472.5	370.3	386	530.5	543.8	499.3	384	487.5	0.546	0	78.12	7	3673.9	763
Q9Y5U9	Immediate early response 3-interacting protein 1 OS=Homo sapiens GN=IER3IP1 PE=1 SV=1	8.963	356.1	435	447.3	491.5	511.3	482.7	445.2	494.7	16.783	0	376.551	2	3663.8	764
Q9H0A0	RNA cytidine acetyltransferase OS=Homo sapiens GN=NAT10 PE=1 SV=2	115.657	497.4	401.1	346.8	444.3	606.8	536.7	397	428.9	0.633	0	218.17	13	3659	765
A0A0A0MR66	RNA binding motif protein 10, isoform CRA_d OS=Homo sapiens GN=RBM10 PE=1 SV=1	110.299	536	378.3	282.8	377.8	838.8	516	325.6	395	0.389	0	135.551	8	3650.3	766
O43808	Peroxisomal membrane protein PMP34 OS=Homo sapiens GN=SLC25A17 PE=1 SV=1	34.545	425.1	379.1	388.6	491	513.8	485.7	399.7	564.8	1.783	0	159.255	5	3647.8	767
Q92973	Transportin-1 OS=Homo sapiens GN=TNPO1 PE=1 SV=2	102.289	404.9	377.7	404.5	546.9	523.2	459.8	400	528.9	1.233	0	323.283	12	3645.9	768
Q99595	Mitochondrial import inner membrane translocase subunit Tim17-A OS=Homo sapiens GN=TIMM17A PE=1 SV=1	18.012	529.3	373.2	347.6	389.3	669.1	519.7	387.5	423.8	2.594	0	179.609	4	3639.5	769
F5GYQ1	V-type proton ATPase subunit d 1 OS=Homo sapiens GN=ATP6V0D1 PE=1 SV=1	44.631	365	364.8	446.3	506.8	497.8	507.3	434.3	515.1	2.162	0	233.816	8	3637.4	770
Q9Y3F4-2	Isoform 2 of Serine-threonine kinase receptor-associated protein OS=Homo sapiens GN=STRAP	39.753	416.7	336.2	400.5	526.5	582	502.7	405.6	466	2.481	0	284.257	10	3636.2	771
O43264	Centromere/kinetochore protein zw10 homolog OS=Homo sapiens GN=ZW10 PE=1 SV=3	88.773	405.6	375.7	423.8	535.5	534.4	465.2	383.3	510	0.526	0	171.054	9	3633.5	772
Q7KZN9	Cytochrome c oxidase assembly protein COX15 homolog OS=Homo sapiens GN=COX15 PE=1 SV=1	46	524.1	372.2	342	432.7	592	526.9	401.8	437.8	1.154	0	74.79	6	3629.5	773
Q9BYB4	Guanine nucleotide-binding protein subunit beta-like protein 1 OS=Homo sapiens GN=GNB1L PE=1 SV=2	35.595	429.5	370.8	408.9	560.8	461.4	467	396.9	527.8	0.624	0	89.45	4	3623.1	774
Q9NXE4-4	Isoform 4 of Sphingomyelin phosphodiesterase 4 OS=Homo sapiens GN=SMPD4	98.086	465.3	377.3	364.1	473.9	600.6	498.6	385.2	453.7	0.425	0	84.0867	7	3618.7	775
O95881	Thioredoxin domain-containing protein 12 OS=Homo sapiens GN=TXNDC12 PE=1 SV=1	19.194	387.8	349.2	395.9	563.7	464.1	428.1	429.5	596.7	2.455	0	188.67	6	3615	776
Q8WXX5	DnaJ homolog subfamily C member 9 OS=Homo sapiens GN=DNAJC9 PE=1 SV=1	29.891	587.9	388.3	245.2	323.9	814.8	539.4	313	389.2	1.448	0	213.717	6	3601.7	777
A0A087WW66	26S proteasome non-ATPase regulatory subunit 1 OS=Homo sapiens GN=PSMD1 PE=1 SV=1	105.784	395.1	327.3	414.1	501.6	557.2	499.9	416.5	484	0.233	0	97.42	5	3595.7	778
Q16555	Dihydropyrimidinase-related protein 2 OS=Homo sapiens GN=DPYSL2 PE=1 SV=1	62.255	428.3	372.4	377.9	539.9	526.4	499.6	379.1	470.3	0.84	1	231.138	8	3593.9	779
E7EQR8	Protein YIPF3 OS=Homo sapiens GN=YIPF3 PE=1 SV=1	38.864	439.5	436.1	456.9	536.1	453.5	452	381.6	432.9	1.512	0	218.257	5	3588.6	780
P43246	DNA mismatch repair protein Msh2 OS=Homo sapiens GN=MSH2 PE=1 SV=1	104.677	408	339.7	411.6	567.6	493.6	448.2	398	507.5	0.759	0	255.32	11	3574.2	781
Q9BTU6	Phosphatidylinositol 4-kinase type 2-alpha OS=Homo sapiens GN=PI4K2A PE=1 SV=1	53.989	413.4	337.9	362.5	435.5	567.1	533.9	388.3	525.5	0.546	0	107.017	7	3564.1	782
P08621	U1 small nuclear ribonucleoprotein 70 kDa OS=Homo sapiens GN=SNRNP70 PE=1 SV=2	51.526	426.2	365.9	355.7	486.9	615.2	481.6	372	449.2	1.239	0	211.765	6	3552.7	783
Q9NR50	Translation initiation factor eIF-2B subunit gamma OS=Homo sapiens GN=EIF2B3 PE=1 SV=1	50.208	393.5	338.4	370.8	481.4	469.1	432.3	337.4	722.9	0.817	0	91.8833	6	3545.8	784
P05783	Keratin, type I cytoskeletal 18 OS=Homo sapiens GN=KRT18 PE=1 SV=2	48.029	464.7	354.2	362.5	442.7	707.2	486.9	326.9	398.7	0.848	0	149.274	8	3543.8	785
P62136	Serine/threonine-protein phosphatase PP1-alpha catalytic subunit OS=Homo sapiens GN=PPP1CA PE=1 SV=1	37.488	455.7	327.3	358.2	471.4	589.3	472.7	362.7	491.4	1.818	5	246.85	7	3528.7	786
P37802-2	Isoform 2 of Transgelin-2 OS=Homo sapiens GN=TAGLN2	24.438	380.4	338.7	428.2	609.2	481.9	460.9	382.1	446.1	2.415	0	236.02	6	3527.5	787
Q8N2G8	GH3 domain-containing protein OS=Homo sapiens GN=GHDC PE=1 SV=2	57.487	386.8	424.4	373.1	512.9	469.4	452.3	382.9	515.8	0.817	0	158.583	7	3517.6	788
P07384	Calpain-1 catalytic subunit OS=Homo sapiens GN=CAPN1 PE=1 SV=1	81.838	389.5	355.1	385.3	493.1	478.7	461.8	426.3	524.8	0.389	0	86.69	5	3514.6	789
Q96DG6	Carboxymethylenebutenolidase homolog OS=Homo sapiens GN=CMBL PE=1 SV=1	28.03	410.1	321.5	378.2	510.4	477.5	474.3	442.3	480.5	1.581	0	120.27	7	3494.8	790
O96005	Cleft lip and palate transmembrane protein 1 OS=Homo sapiens GN=CLPTM1 PE=1 SV=1	76.048	388.4	390.4	403.5	516.2	470	463.9	379.4	477.9	1.154	0	268.404	8	3489.7	791
P35613	Basigin OS=Homo sapiens GN=BSG PE=1 SV=2	42.174	375.5	349.6	417.6	563.7	422.8	449.9	410.6	498.9	1.239	0	113.933	6	3488.6	792
Q13642-4	Isoform 4 of Four and a half LIM domains protein 1 OS=Homo sapiens GN=FHL1	34.973	392	319.1	348.9	498.5	551.7	509.7	410.2	456.6	0.995	0	188.05	5	3486.7	793
P61803	Dolichyl-diphosphooligosaccharide--protein glycosyltransferase subunit DAD1 OS=Homo sapiens GN=DAD1 PE=1 SV=3	12.489	392.1	351.2	375	456.3	466.6	471.5	415.6	556.7	14.849	0	138.2	4	3485	794
Q9NP72	Ras-related protein Rab-18 OS=Homo sapiens GN=RAB18 PE=1 SV=1	22.963	415.2	346.2	389.8	512.2	504.3	459.5	407.8	447.7	5.105	0	316.174	8	3482.7	795
P49721	Proteasome subunit beta type-2 OS=Homo sapiens GN=PSMB2 PE=1 SV=1	22.822	466.7	359.3	378.3	409.3	628.5	499.3	359.1	379.5	0.701	0	56.98	3	3480	796
Q9HA64	Ketosamine-3-kinase OS=Homo sapiens GN=FN3KRP PE=1 SV=2	34.39	384.3	335.9	374.1	583.7	480.7	457.7	372.5	480.2	0.896	0	128.016	4	3469.1	797
Q53GS7	Nucleoporin GLE1 OS=Homo sapiens GN=GLE1 PE=1 SV=2	79.786	516	371	330.2	410	621.1	490.6	330.1	388.5	0.569	0	112.963	9	3457.5	798
P18859-2	Isoform 2 of ATP synthase-coupling factor 6, mitochondrial OS=Homo sapiens GN=ATP5J	13.38	426.6	329.9	323.3	395.3	619.1	536.4	376.2	450.7	9	0	275.24	4	3457.5	799
Q9NXS2	Glutaminyl-peptide cyclotransferase-like protein OS=Homo sapiens GN=QPCTL PE=1 SV=2	42.897	404.2	368.7	383.8	487.6	487.8	470.9	379.6	466.8	1.448	0	79.79	6	3449.4	800
P16152	Carbonyl reductase [NADPH] 1 OS=Homo sapiens GN=CBR1 PE=1 SV=3	30.356	511.9	346.3	367.7	574.2	446.2	459.5	320.4	422.2	4.995	0	344.39	11	3448.4	801
G3V1V0	Myosin light polypeptide 6 OS=Homo sapiens GN=MYL6 PE=1 SV=1	18.026	385.2	316.9	372.1	495.8	542	480.8	386	467.3	1.61	0	189.467	5	3446.1	802
F6WQW2	Ran-specific GTPase-activating protein OS=Homo sapiens GN=RANBP1 PE=1 SV=1	31.884	355.7	315.7	402.7	589.2	425.4	469.7	392	495.2	0.54	0	85.1833	3	3445.6	803
Q9UNL2-2	Isoform 2 of Translocon-associated protein subunit gamma OS=Homo sapiens GN=SSR3	22.596	416.6	319.9	343.7	425.5	552.9	494.5	411.7	474.7	1.371	0	259	1	3439.5	804
Q9BRT6	Protein LLP homolog OS=Homo sapiens GN=LLPH PE=1 SV=1	15.215	523.6	390.6	287.1	351.8	720.4	455.4	293	416.1	1.512	0	47.04	2	3438	805
Q96N66	Lysophospholipid acyltransferase 7 OS=Homo sapiens GN=MBOAT7 PE=1 SV=2	52.73	399	376.9	362.5	431.3	477.1	492.9	388.6	502.6	0.874	0	198.965	5	3430.9	806
Q8IXI1	Mitochondrial Rho GTPase 2 OS=Homo sapiens GN=RHOT2 PE=1 SV=2	68.075	434.1	325.3	363.2	457	543.8	484.1	367.4	454.5	0.585	1	138.619	6	3429.4	807
Q8IZL8	Proline-, glutamic acid- and leucine-rich protein 1 OS=Homo sapiens GN=PELP1 PE=1 SV=2	119.624	444.9	356.4	313.8	411.4	603.2	513.4	340	445.1	0.679	0	247.364	7	3428.2	808
P16403	Histone H1.2 OS=Homo sapiens GN=HIST1H1C PE=1 SV=2	21.352	518.5	529	277.9	508.1	481.2	428.6	254	421.6	27.943	0	893.868	12	3418.9	809
Q96GA3	Protein LTV1 homolog OS=Homo sapiens GN=LTV1 PE=1 SV=1	54.821	494.6	306.9	314.2	377.5	736.3	472.4	317.5	382.8	0.509	0	147.06	5	3402.2	810
O95139	NADH dehydrogenase [ubiquinone] 1 beta subcomplex subunit 6 OS=Homo sapiens GN=NDUFB6 PE=1 SV=3	15.479	407.6	351.4	317.8	399.7	515.3	550.4	397.5	452.6	2.594	0	114.76	4	3392.3	811
A0A0A0MQR2	Protein RTF2 homolog OS=Homo sapiens GN=RTFDC1 PE=1 SV=1	37.508	381.3	356.9	414.3	521.4	475.7	444.8	366.6	422.4	1.081	0	182.565	5	3383.4	812
Q08722	Leukocyte surface antigen CD47 OS=Homo sapiens GN=CD47 PE=1 SV=1	35.191	328.2	347.6	421.6	509.3	398	477.1	410.5	468.7	0.848	0	96.57	3	3361	813
O43347	RNA-binding protein Musashi homolog 1 OS=Homo sapiens GN=MSI1 PE=1 SV=1	39.099	481.6	328.8	317.4	369.1	697.3	493.9	324.6	337.9	0.968	0	88.77	5	3350.6	814
Q92896-2	Isoform 2 of Golgi apparatus protein 1 OS=Homo sapiens GN=GLG1	137.132	398.7	371.6	429.6	529	447.7	426.5	341.3	402	0.328	0	104.494	9	3346.4	815
B3KMV8	cDNA FLJ12766 fis, clone NT2RP2001520, highly similar to Calcium-binding mitochondrial carrier protein Aralar1 OS=Homo sapiens PE=2 SV=1	74.731	397.4	316.3	351.1	433.6	473.4	496	393.8	478.6	1.276	0	329.8	12	3340.2	816
Q96JB5-4	Isoform 4 of CDK5 regulatory subunit-associated protein 3 OS=Homo sapiens GN=CDK5RAP3	59.551	353.8	316	386.8	483.2	448.9	464.7	387.8	498.7	0.433	0	81.5056	5	3339.9	817
P11413-2	Isoform Long of Glucose-6-phosphate 1-dehydrogenase OS=Homo sapiens GN=G6PD	63.786	339.8	335	405.9	461.1	451.6	443.6	424	475.1	0.496	0	180.501	7	3336.1	818
P29372	DNA-3-methyladenine glycosylase OS=Homo sapiens GN=MPG PE=1 SV=3	32.848	397.3	336.3	326.7	455.6	516	485.9	362.8	454.6	0.968	0	126	5	3335.2	819
Q9Y3C1	Nucleolar protein 16 OS=Homo sapiens GN=NOP16 PE=1 SV=2	21.175	487.7	401.5	281.4	395.5	576.4	480	331.3	373.8	1.848	0	78.56	5	3327.6	820
G4XN19	MHC class I antigen OS=Homo sapiens GN=HLA-B PE=3 SV=1	40.451	386.2	356.1	442.3	552.5	447.3	408.8	368.2	361.5	2.34	2	317.643	8	3322.9	821
O60832	H/ACA ribonucleoprotein complex subunit 4 OS=Homo sapiens GN=DKC1 PE=1 SV=3	57.638	471.9	341.1	290.5	394	584.3	497.2	335.4	401.5	0.607	0	179.29	7	3315.9	822
P21281	V-type proton ATPase subunit B, brain isoform OS=Homo sapiens GN=ATP6V1B2 PE=1 SV=3	56.465	394.9	326.3	401	506.8	458.8	442.3	335.3	447.9	0.711	0	97.5833	7	3313.3	823
A3KMH1	von Willebrand factor A domain-containing protein 8 OS=Homo sapiens GN=VWA8 PE=1 SV=2	214.689	421.4	311.1	316.5	416.9	596.8	461.7	355.2	433.3	0.135	0	37.72	7	3312.9	824
Q8TEX9-2	Isoform 2 of Importin-4 OS=Homo sapiens GN=IPO4	118.826	470	386.9	377.7	473	519.9	414.3	303.4	360.7	0.274	0	135.461	6	3305.9	825
Q9BSE4	Homocysteine-responsive endoplasmic reticulum-resident ubiquitin-like domain member 2 protein OS=Homo sapiens GN=HERPUD2 PE=1 SV=2	45.119	407.4	349.2	320.4	317.9	574	520.1	378.1	416	1.154	0	278.455	3	3283.1	826
P61009	Signal peptidase complex subunit 3 OS=Homo sapiens GN=SPCS3 PE=1 SV=1	20.301	366.3	340.6	339.8	494.8	403.3	447.3	380.5	504.3	6.499	0	212.32	4	3276.9	827
P08574	Cytochrome c1, heme protein, mitochondrial OS=Homo sapiens GN=CYC1 PE=1 SV=3	35.399	370.7	333.3	332.9	408.2	469	505.4	365.6	466.6	0.624	0	197.163	3	3251.7	828
P20020	Plasma membrane calcium-transporting ATPase 1 OS=Homo sapiens GN=ATP2B1 PE=1 SV=3	138.668	384.8	361	382.4	481.3	453.5	420.2	347.7	416.3	0.222	0	156.026	6	3247.2	829
P62195	26S protease regulatory subunit 8 OS=Homo sapiens GN=PSMC5 PE=1 SV=1	45.597	396.3	313.3	351.7	411.6	516.4	476.1	366.1	408	1.683	1	200.602	10	3239.5	830
Q16186	Proteasomal ubiquitin receptor ADRM1 OS=Homo sapiens GN=ADRM1 PE=1 SV=2	42.127	364	302.5	393.5	492.4	440.3	431.2	367.4	434.7	0.778	0	52.9767	2	3226	831
P46940	Ras GTPase-activating-like protein IQGAP1 OS=Homo sapiens GN=IQGAP1 PE=1 SV=1	189.134	384.4	322.9	341.2	473.3	494.9	416.3	356.4	427.2	0.438	0	209.302	13	3216.6	832
P03915	NADH-ubiquinone oxidoreductase chain 5 OS=Homo sapiens GN=MT-ND5 PE=1 SV=2	66.982	361.6	313.5	322.6	447.7	459.9	471.6	366.4	468.7	0.73	0	186.42	3	3212	833
P04049-2	Isoform 2 of RAF proto-oncogene serine/threonine-protein kinase OS=Homo sapiens GN=RAF1	75.347	468.2	331	321.8	406.7	579.8	416	298.6	383.6	0.431	0	80.5895	6	3205.7	834
Q13243	Serine/arginine-rich splicing factor 5 OS=Homo sapiens GN=SRSF5 PE=1 SV=1	31.245	459.1	333.8	281.3	324.4	611.1	462.9	336.5	395.8	2.162	0	213.663	5	3204.9	835
O14975	Very long-chain acyl-CoA synthetase OS=Homo sapiens GN=SLC27A2 PE=1 SV=2	70.267	414.1	343.6	333.9	433.2	506.6	440.8	328.4	403.8	0.438	0	124.61	5	3204.4	836
Q8TAD4	Zinc transporter 5 OS=Homo sapiens GN=SLC30A5 PE=1 SV=1	83.992	468.1	442.9	406.5	424.6	413.4	392.1	300.2	355.1	0.812	0	156.283	7	3202.9	837
Q16629	Serine/arginine-rich splicing factor 7 OS=Homo sapiens GN=SRSF7 PE=1 SV=1	27.35	388.4	319	352.3	496.6	451.4	427.3	331.6	431.2	1.054	1	152.053	4	3197.8	838
Q96G23	Ceramide synthase 2 OS=Homo sapiens GN=CERS2 PE=1 SV=1	44.847	379.2	338.4	356.6	443.6	457.5	456.4	350.8	414.5	0.501	0	99.39	2	3197	839
C9JRZ6	MICOS complex subunit OS=Homo sapiens GN=CHCHD3 PE=1 SV=1	26.678	319.2	316.8	354.7	428.6	453.8	451	335.6	534.7	1.336	0	128.303	6	3194.4	840
Q9BTE3	Mini-chromosome maintenance complex-binding protein OS=Homo sapiens GN=MCMBP PE=1 SV=2	72.934	393.8	338.6	362.3	428.3	475.6	420.4	365.1	398.4	1.113	0	202.578	13	3182.5	841
Q9NYP7-2	Isoform 2 of Elongation of very long chain fatty acids protein 5 OS=Homo sapiens GN=ELOVL5	38.377	338.8	307.9	304.4	379.4	459.3	465.4	360.9	548.2	1.424	0	126.409	4	3164.3	842
P51858-3	Isoform 3 of Hepatoma-derived growth factor OS=Homo sapiens GN=HDGF	28.247	346.8	296.8	340.8	514.1	450.5	425.9	357.1	432.3	1.955	0	156.952	6	3164.3	843
Q15369	Transcription elongation factor B polypeptide 1 OS=Homo sapiens GN=TCEB1 PE=1 SV=1	12.465	348.7	280.9	344.7	444.1	444.5	425	361.7	501.1	3.217	0	280.343	3	3150.7	844
O95169	NADH dehydrogenase [ubiquinone] 1 beta subcomplex subunit 8, mitochondrial OS=Homo sapiens GN=NDUFB8 PE=1 SV=1	21.751	357.9	327	325.2	405.6	448.6	492.8	370.3	413.6	3.329	0	160.344	5	3141	845
P60604	Ubiquitin-conjugating enzyme E2 G2 OS=Homo sapiens GN=UBE2G2 PE=1 SV=1	18.554	353.3	371.3	317.4	344.4	480.4	499.7	361.7	409.7	3.642	0	290.794	3	3137.9	846
P17980	26S protease regulatory subunit 6A OS=Homo sapiens GN=PSMC3 PE=1 SV=3	49.172	324.7	302.1	361.6	411.6	461.8	448	366.2	456.2	0.532	0	161.14	4	3132.2	847
F8VX04	Sodium-coupled neutral amino acid transporter 1 OS=Homo sapiens GN=SLC38A1 PE=1 SV=1	56.158	355.7	324.9	356.3	481.6	405.9	396.3	342.6	457.3	0.551	0	68.7067	3	3120.6	848
Q9HAD4	WD repeat-containing protein 41 OS=Homo sapiens GN=WDR41 PE=2 SV=3	51.695	434.4	345.5	317.9	385.8	593.9	391.2	298	353.5	0.778	0	97.52	7	3120.2	849
Q12981	Vesicle transport protein SEC20 OS=Homo sapiens GN=BNIP1 PE=1 SV=3	26.116	369.2	331.6	369	424.5	451.9	407.2	334.1	414.3	1.371	0	127.14	5	3101.8	850
Q9BZE1	39S ribosomal protein L37, mitochondrial OS=Homo sapiens GN=MRPL37 PE=1 SV=2	48.087	386.5	335.5	326.2	394.2	525.7	428.3	327.6	372	0.433	0	96.64	5	3096	851
O43684	Mitotic checkpoint protein BUB3 OS=Homo sapiens GN=BUB3 PE=1 SV=1	37.131	357.8	302.4	376.7	482.6	400.1	392.6	340.2	429.4	1.783	0	228.895	8	3081.8	852
P17568	NADH dehydrogenase [ubiquinone] 1 beta subcomplex subunit 7 OS=Homo sapiens GN=NDUFB7 PE=1 SV=4	16.391	352.6	305.3	304.6	380.1	429	537.4	381.2	388.8	4.623	0	162.893	5	3079	853
Q10469	Alpha-1,6-mannosyl-glycoprotein 2-beta-N-acetylglucosaminyltransferase OS=Homo sapiens GN=MGAT2 PE=1 SV=1	51.517	389.5	319.4	295.9	387.8	554.6	434.5	320.6	375	0.65	0	64.54	5	3077.3	854
Q15046-2	Isoform Mitochondrial of Lysine--tRNA ligase OS=Homo sapiens GN=KARS	71.451	348.8	294.9	380.8	447.1	454.7	413.9	340.3	380.2	0.863	0	169.05	9	3060.7	855
Q5T9A4	ATPase family AAA domain-containing protein 3B OS=Homo sapiens GN=ATAD3B PE=1 SV=1	72.527	331.4	306.6	329.2	381.5	518.3	408.2	349.4	428.5	5.244	0	872.774	27	3053.1	856
Q9Y221	60S ribosome subunit biogenesis protein NIP7 homolog OS=Homo sapiens GN=NIP7 PE=1 SV=1	20.449	523.4	322.7	251.1	306.3	589.3	388.7	296.5	374.6	1.31	0	85.54	4	3052.6	857
Q92520	Protein FAM3C OS=Homo sapiens GN=FAM3C PE=1 SV=1	24.665	358.4	374.8	371.3	410.4	402.7	443.6	347.4	343.1	1.738	0	193.443	4	3051.7	858
X6R2S6	Signal peptidase complex subunit 1 OS=Homo sapiens GN=SPCS1 PE=1 SV=1	18.286	331.1	337.8	343.1	415.1	384.9	429.4	360.5	441.5	9	0	96.21	2	3043.4	859
P62158	Calmodulin OS=Homo sapiens GN=CALM1 PE=1 SV=2	16.827	326.1	283.7	358.3	417	445.8	420.3	363.9	424.9	1.512	0	163.82	3	3040	860
P48509	CD151 antigen OS=Homo sapiens GN=CD151 PE=1 SV=3	28.276	349.9	347.5	354.4	421.6	445.2	386.8	306.6	416.9	0.931	0	83.95	4	3028.9	861
P82933	28S ribosomal protein S9, mitochondrial OS=Homo sapiens GN=MRPS9 PE=1 SV=2	45.806	392.3	289.9	317.8	386.7	567.6	408.7	299.8	363.5	0.374	0	59.4133	4	3026.3	862
Q96AY3	Peptidyl-prolyl cis-trans isomerase FKBP10 OS=Homo sapiens GN=FKBP10 PE=1 SV=1	64.204	317.3	288.1	297.1	389	464.9	433.7	341.4	486.8	0.453	0	126.373	5	3018.3	863
Q9ULG6-5	Isoform 5 of Cell cycle progression protein 1 OS=Homo sapiens GN=CCPG1	93.43	220.9	224.7	354.4	646.1	319.4	280.2	382.3	567.1	0.292	0	83.91	4	2995.1	864
Q96KB5-2	Isoform 2 of Lymphokine-activated killer T-cell-originated protein kinase OS=Homo sapiens GN=PBK	37.188	380.1	324.5	373.5	533.1	375.3	355.8	301.3	348.6	1.154	0	84.44	6	2992.2	865
Q9ULW0-2	Isoform 2 of Targeting protein for Xklp2 OS=Homo sapiens GN=TPX2	89.338	355.6	280.5	317.4	397.5	466.5	436.6	339.6	397.5	0.668	0	153.323	9	2991.2	866
O00217	NADH dehydrogenase [ubiquinone] iron-sulfur protein 8, mitochondrial OS=Homo sapiens GN=NDUFS8 PE=1 SV=1	23.69	342.6	295.8	301.5	385.2	437.4	452.7	347.9	425.6	1.738	0	205.783	5	2988.7	867
Q8N2K0-2	Isoform 2 of Monoacylglycerol lipase ABHD12 OS=Homo sapiens GN=ABHD12	45.529	379.1	309	310.3	368.4	524.6	399.4	304.3	386.6	0.65	0	89.95	5	2981.7	868
Q86Y82	Syntaxin-12 OS=Homo sapiens GN=STX12 PE=1 SV=1	31.622	326.4	322.1	291.5	377.6	539.6	434.6	325.6	363.8	0.778	0	160.29	4	2981.2	869
Q9NZ45	CDGSH iron-sulfur domain-containing protein 1 OS=Homo sapiens GN=CISD1 PE=1 SV=1	12.191	389.9	272.2	281.1	345.4	604.3	431.8	296.5	358.9	3.642	0	117.203	4	2980.1	870
A6NMH8	Tetraspanin OS=Homo sapiens GN=CD81 PE=1 SV=1	29.786	336.7	331.2	357	454.7	372.3	390.7	332.5	401.2	1.512	0	256.03	2	2976.3	871
P57737-3	Isoform 3 of Coronin-7 OS=Homo sapiens GN=CORO7	114.095	388.9	305.4	278.5	324.1	531.1	439.2	319.6	368.7	0.259	0	140.15	5	2955.5	872
Q9BQA1	Methylosome protein 50 OS=Homo sapiens GN=WDR77 PE=1 SV=1	36.701	353.1	324.9	327.6	381.9	473.7	403	297.1	386.8	1.276	0	135.97	3	2948.1	873
P48507	Glutamate--cysteine ligase regulatory subunit OS=Homo sapiens GN=GCLM PE=1 SV=1	30.708	332.7	282	328.3	424.6	410.9	404	341.4	415.8	3.924	0	271.134	6	2939.7	874
P08133	Annexin A6 OS=Homo sapiens GN=ANXA6 PE=1 SV=3	75.826	261.6	245.5	368.4	517.6	304.6	326.8	385.7	528.4	0.82	0	179.55	13	2938.6	875
Q2PZI1	Probable C-mannosyltransferase DPY19L1 OS=Homo sapiens GN=DPY19L1 PE=2 SV=1	77.267	354.2	319.7	301.6	384.6	431.2	426.6	325.6	395	0.417	0	131.32	4	2938.5	876
Q9NVU7	Protein SDA1 homolog OS=Homo sapiens GN=SDAD1 PE=1 SV=3	79.82	487.1	291.6	215.4	283.6	653.9	400.2	267.4	337.1	0.468	0	162.817	7	2936.3	877
Q15629	Translocating chain-associated membrane protein 1 OS=Homo sapiens GN=TRAM1 PE=1 SV=3	43.044	335.5	306.2	301.9	366.6	480.6	411.7	324.4	405.5	3.87	0	289.297	7	2932.4	878
Q06323	Proteasome activator complex subunit 1 OS=Homo sapiens GN=PSME1 PE=1 SV=1	28.705	362.7	310.6	357	513.3	377.9	367.4	297.1	346.2	1.336	0	194.943	6	2932.2	879
O43678	NADH dehydrogenase [ubiquinone] 1 alpha subcomplex subunit 2 OS=Homo sapiens GN=NDUFA2 PE=1 SV=3	10.915	322.7	300.8	301	368.9	434.6	460.1	344.9	399.1	4.179	0	289.68	5	2932.1	880
A0A087X1Z3	Proteasome activator complex subunit 2 OS=Homo sapiens GN=PSME2 PE=1 SV=1	29.108	352.2	343.3	387.3	515.5	339.1	326.8	290.1	376	0.778	0	130.85	5	2930.3	881
O43491	Band 4.1-like protein 2 OS=Homo sapiens GN=EPB41L2 PE=1 SV=1	112.519	342.9	384.4	268.1	378.2	476.9	384.6	325.6	365.1	0.152	0	81.48	4	2925.8	882
Q9UL25	Ras-related protein Rab-21 OS=Homo sapiens GN=RAB21 PE=1 SV=3	24.332	309.7	294.7	321.8	453.9	414.2	372.1	331.1	426.4	1.154	0	120.2	4	2923.9	883
P42285	Superkiller viralicidic activity 2-like 2 OS=Homo sapiens GN=SKIV2L2 PE=1 SV=3	117.729	392.8	291.1	274.6	365.6	554	397.3	295.2	344.2	0.397	0	169.363	8	2914.8	884
O95202	LETM1 and EF-hand domain-containing protein 1, mitochondrial OS=Homo sapiens GN=LETM1 PE=1 SV=1	83.302	374.9	306.9	285.1	363.7	501.1	409.7	316.7	354.5	0.492	0	154.834	8	2912.6	885
Q9GZR5	Elongation of very long chain fatty acids protein 4 OS=Homo sapiens GN=ELOVL4 PE=1 SV=1	36.805	360.2	321.6	298.1	383.9	393.4	425.4	324.7	400.7	0.931	0	72.32	3	2908	886
Q9P0I2	ER membrane protein complex subunit 3 OS=Homo sapiens GN=EMC3 PE=1 SV=3	29.932	335.1	294.5	298.8	382.2	422.7	412.8	336.5	425.2	1.154	0	169.757	3	2907.8	887
P33981	Dual specificity protein kinase TTK OS=Homo sapiens GN=TTK PE=1 SV=2	97.011	341.7	278.3	311.4	412.9	479	414.4	299.8	354.5	0.435	0	130.91	8	2892	888
O00743-3	Isoform 3 of Serine/threonine-protein phosphatase 6 catalytic subunit OS=Homo sapiens GN=PPP6C	38.921	394.7	259.8	317.8	369	521.8	387.8	297.8	342.6	2.162	0	158.903	9	2891.3	889
Q13895	Bystin OS=Homo sapiens GN=BYSL PE=1 SV=3	49.57	408.3	278.7	243.5	300.9	630.6	395.1	281.5	310.9	0.743	0	181.4	5	2849.5	890
Q9UBX3-2	Isoform 2 of Mitochondrial dicarboxylate carrier OS=Homo sapiens GN=SLC25A10	32.125	347.6	267.1	266.6	327.6	460	403.7	308.3	459.9	1.976	0	240.172	7	2840.8	891
Q0ZFE3	ATP synthase subunit a OS=Homo sapiens GN=ATP6 PE=4 SV=1	24.801	360.1	280.4	248.2	357.1	487.8	405.8	304.4	382.6	1.512	0	159.65	1	2826.4	892
Q15021	Condensin complex subunit 1 OS=Homo sapiens GN=NCAPD2 PE=1 SV=3	157.082	343.4	273.2	313.7	380.1	477	384.5	296	358.5	0.166	0	90.13	6	2826.4	893
Q14442	Phosphatidylinositol N-acetylglucosaminyltransferase subunit H OS=Homo sapiens GN=PIGH PE=1 SV=1	21.067	290.9	303.2	319.4	413.5	392.2	397	336.4	370.3	0.468	0	98.0533	2	2822.9	894
Q14258	E3 ubiquitin/ISG15 ligase TRIM25 OS=Homo sapiens GN=TRIM25 PE=1 SV=2	70.928	316.5	285.6	327.5	418.1	414.7	374.9	311.4	373.2	1.239	0	266.45	12	2821.9	895
O60524	Nuclear export mediator factor NEMF OS=Homo sapiens GN=NEMF PE=1 SV=4	122.878	388.3	279.9	274.1	333.1	621.5	398.3	238.2	287.6	0.459	0	160.751	10	2821	896
Q96C36	Pyrroline-5-carboxylate reductase 2 OS=Homo sapiens GN=PYCR2 PE=1 SV=1	33.616	358.1	282.9	287	330.9	546.5	384.6	295.6	331.2	1.929	0	222.13	5	2816.8	897
P49589-3	Isoform 3 of Cysteine--tRNA ligase, cytoplasmic OS=Homo sapiens GN=CARS	94.578	319.4	280	319.3	374.7	462.5	378.6	303.8	373.9	0.265	0	125.06	5	2812.2	898
Q9Y295	Developmentally-regulated GTP-binding protein 1 OS=Homo sapiens GN=DRG1 PE=1 SV=1	40.517	340.4	277.8	287.3	357.8	458.4	393.4	286.5	394.1	0.701	0	183.41	5	2795.7	899
Q9NNW5	WD repeat-containing protein 6 OS=Homo sapiens GN=WDR6 PE=1 SV=1	121.647	358.4	290.2	294.6	363.5	472	369	291.6	353.8	0.487	0	257.085	9	2793.1	900
Q9GZP9	Derlin-2 OS=Homo sapiens GN=DERL2 PE=1 SV=1	27.549	298.4	291.6	285.4	315.3	396.7	436.1	366.6	395.2	3.642	0	158.502	4	2785.3	901
Q969V3	Nicalin OS=Homo sapiens GN=NCLN PE=1 SV=2	62.935	323.6	266.1	273.6	352.4	459.4	394.4	320.5	383.8	0.562	0	169.647	6	2773.8	902
Q8IUQ4-2	Isoform 2 of E3 ubiquitin-protein ligase SIAH1 OS=Homo sapiens GN=SIAH1	34.605	255.6	259.4	309.8	591.8	328.1	342.1	308.6	377.8	1.254	0	132.723	4	2773.2	903
P48556	26S proteasome non-ATPase regulatory subunit 8 OS=Homo sapiens GN=PSMD8 PE=1 SV=2	39.587	313.3	258.7	309.9	365.3	424.7	394.9	321.7	381.6	0.778	0	60.07	6	2770.1	904
Q8WUW1-2	Isoform 2 of Protein BRICK1 OS=Homo sapiens GN=BRK1	12.038	313	259.1	311	399.2	392.9	366.6	316.8	409.6	1.512	0	73.27	4	2768.2	905
H0Y8C2	60S ribosomal protein L22-like 1 (Fragment) OS=Homo sapiens GN=RPL22L1 PE=1 SV=1	16.89	335.6	241.6	238.1	277.5	612.8	404.4	300.3	355.9	2.594	0	100.42	4	2766.2	906
Q96HE7	ERO1-like protein alpha OS=Homo sapiens GN=ERO1A PE=1 SV=2	54.358	332.6	291.3	313.2	439.9	345.2	353.9	280.2	397.6	0.487	0	90.3	5	2753.9	907
E7EQ64	Trypsin-1 OS=Homo sapiens GN=PRSS1 PE=1 SV=1	28.105	316.2	345.7	300.3	435	366.1	304.9	253.8	430.3	0.585	0	26.48	2	2752.3	908
O00592	Podocalyxin OS=Homo sapiens GN=PODXL PE=1 SV=2	58.599	303.3	264.7	315.1	394.1	365.9	369.5	325.9	411.3	0.468	0	23.32	3	2749.8	909
C9JA08	60S ribosomal export protein NMD3 OS=Homo sapiens GN=NMD3 PE=1 SV=1	60.087	304.6	243.3	287.2	348.5	489.7	371.1	309.4	395.4	0.848	0	95.7686	7	2749.2	910
P54886	Delta-1-pyrroline-5-carboxylate synthase OS=Homo sapiens GN=ALDH18A1 PE=1 SV=2	87.248	303.1	293.3	277.6	365.1	420.8	381.2	298.8	407.3	0.585	0	139.97	9	2747.2	911
Q15645	Pachytene checkpoint protein 2 homolog OS=Homo sapiens GN=TRIP13 PE=1 SV=2	48.52	343.7	270	300	377.5	431.3	348.9	301.9	357.2	0.905	0	149.019	7	2730.5	912
Q8TBA6	Golgin subfamily A member 5 OS=Homo sapiens GN=GOLGA5 PE=1 SV=3	82.974	334	271.9	303.1	369.7	412.3	386.8	285	367.6	0.54	0	151.747	9	2730.4	913
Q9NR77	Peroxisomal membrane protein 2 OS=Homo sapiens GN=PXMP2 PE=1 SV=3	22.238	356.7	274.3	250.7	330.8	473.1	360.1	281.7	399.7	0.778	0	52.41	3	2727.1	914
O75663	TIP41-like protein OS=Homo sapiens GN=TIPRL PE=1 SV=2	31.424	361.9	262.9	268	312.7	515.7	357.6	285.2	353.8	0.833	0	71.06	5	2717.8	915
Q96S66	Chloride channel CLIC-like protein 1 OS=Homo sapiens GN=CLCC1 PE=1 SV=1	61.983	297.4	279.9	294.8	341.8	422.4	391.7	292.4	397.1	0.947	0	148.471	8	2717.5	916
Q96HY6	DDRGK domain-containing protein 1 OS=Homo sapiens GN=DDRGK1 PE=1 SV=2	35.589	281.9	284.3	337.3	377.7	358	368.1	311.7	387.4	2.162	0	406.63	6	2706.4	917
P17096-3	Isoform HMG-R of High mobility group protein HMG-I/HMG-Y OS=Homo sapiens GN=HMGA1	19.682	340.7	345.8	199.5	467.3	352.1	397.6	230	370.5	2.728	2	70.69	3	2703.5	918
P11177	Pyruvate dehydrogenase E1 component subunit beta, mitochondrial OS=Homo sapiens GN=PDHB PE=1 SV=3	39.208	353.4	234.9	254.2	331.3	564.5	398	264.1	301.3	1.154	0	223.667	6	2701.7	919
Q14839-2	Isoform 2 of Chromodomain-helicase-DNA-binding protein 4 OS=Homo sapiens GN=CHD4	220.709	325.9	265.3	268.7	404	429.5	376.3	293.2	333.6	0.216	0	141.901	7	2696.5	920
Q9Y619	Mitochondrial ornithine transporter 1 OS=Homo sapiens GN=SLC25A15 PE=1 SV=1	32.715	352.5	243.8	240.8	345.9	475.6	411.3	278.5	337.2	1.069	0	124.217	5	2685.6	921
Q6ZPD9	Probable C-mannosyltransferase DPY19L3 OS=Homo sapiens GN=DPY19L3 PE=2 SV=1	83.142	294.9	266.6	261	358.6	415.8	386.6	302.6	395.8	0.54	0	124.41	6	2681.9	922
E5RIM7	Copper transport protein ATOX1 OS=Homo sapiens GN=ATOX1 PE=1 SV=1	7.869	310.9	255.7	327	465.2	328.1	325.2	295.1	374.1	1.512	0	35.55	2	2681.3	923
Q12789	General transcription factor 3C polypeptide 1 OS=Homo sapiens GN=GTF3C1 PE=1 SV=4	238.725	322.4	253.5	276.8	351.3	465.5	381.7	294.7	332.3	0.141	0	47.7767	7	2678.2	924
Q8N257	Histone H2B type 3-B OS=Homo sapiens GN=HIST3H2BB PE=1 SV=3	13.9	370.1	382.6	193	469.6	308.2	481.6	227.8	243.5	14.199	0	647.136	8	2676.4	925
Q15393	Splicing factor 3B subunit 3 OS=Homo sapiens GN=SF3B3 PE=1 SV=4	135.492	356.6	290.8	292.2	356.4	411.2	367.4	267.1	329.6	0.425	0	130.35	9	2671.3	926
O60678	Protein arginine N-methyltransferase 3 OS=Homo sapiens GN=PRMT3 PE=1 SV=3	59.838	325.7	268.7	334.7	413.4	384.3	317.7	292	333.5	0.532	0	135.83	5	2670	927
Q86SF2	N-acetylgalactosaminyltransferase 7 OS=Homo sapiens GN=GALNT7 PE=1 SV=1	75.341	307.3	276.7	287	358.5	384.8	376.7	321.2	353.9	0.602	0	60.6514	9	2666.1	928
Q8TB61	Adenosine 3'-phospho 5'-phosphosulfate transporter 1 OS=Homo sapiens GN=SLC35B2 PE=1 SV=1	47.484	334.1	340.4	340.5	369.9	352.3	345.8	264.8	310.9	0.73	0	128.9	4	2658.7	929
Q56VL3	OCIA domain-containing protein 2 OS=Homo sapiens GN=OCIAD2 PE=1 SV=1	16.943	325.3	281.9	266.3	321	440.3	381.8	287.9	353.1	1.894	0	162.47	5	2657.6	930
Q14061	Cytochrome c oxidase copper chaperone OS=Homo sapiens GN=COX17 PE=1 SV=2	6.91	296.3	260.9	306.4	436.7	351	324.2	302.4	378.6	9	0	87.4733	3	2656.5	931
A0A0A0MRV0	Ribosome-binding protein 1 OS=Homo sapiens GN=RRBP1 PE=1 SV=1	152.365	310.3	269.7	265.6	339.9	428.1	385.2	307.6	345.1	0.259	0	198.678	11	2651.5	932
Q93008	Probable ubiquitin carboxyl-terminal hydrolase FAF-X OS=Homo sapiens GN=USP9X PE=1 SV=3	292.094	315.3	266.1	285.6	368.6	443.6	347.4	293.8	327.4	0.233	0	150.501	13	2647.8	933
Q9UBB4	Ataxin-10 OS=Homo sapiens GN=ATXN10 PE=1 SV=1	53.455	310.4	253.8	284	391.2	376.9	349.8	287.8	374.1	0.812	0	234.869	6	2628	934
Q9BQE4	Selenoprotein S OS=Homo sapiens GN=VIMP PE=1 SV=3	21.151	212.5	270	224.5	220.1	413.4	489.6	359.6	437.5	5.31	1	164.44	6	2627.2	935
A0A0C4DFL7	Lanosterol 14-alpha demethylase OS=Homo sapiens GN=CYP51A1 PE=1 SV=1	57.242	327.4	288.9	320.9	364.1	405	360.4	256.7	296.1	0.359	0	160.25	4	2619.5	936
P23246	Splicing factor, proline- and glutamine-rich OS=Homo sapiens GN=SFPQ PE=1 SV=2	76.102	287.2	237.8	270.7	404.2	399.9	356.3	275.9	357.5	0.719	0	109.59	6	2589.5	937
P61106	Ras-related protein Rab-14 OS=Homo sapiens GN=RAB14 PE=1 SV=4	23.882	298.3	247.7	307.8	396.2	382.1	327.8	279.9	342.6	2.981	0	148.086	5	2582.4	938
P22234-2	Isoform 2 of Multifunctional protein ADE2 OS=Homo sapiens GN=PAICS	47.928	305.3	243.7	304.9	390.6	399.1	353.2	271.3	309.9	0.509	0	76.06	4	2578	939
Q5SWX8	Protein odr-4 homolog OS=Homo sapiens GN=ODR4 PE=1 SV=1	51.071	279	261	258.6	345.4	390.7	379.5	298.9	364.2	0.425	0	80.18	4	2577.3	940
Q03252	Lamin-B2 OS=Homo sapiens GN=LMNB2 PE=1 SV=4	69.906	361.5	295.3	258.7	344.6	412.2	362.6	240.9	287.3	0.551	0	116.867	7	2563.1	941
P45974	Ubiquitin carboxyl-terminal hydrolase 5 OS=Homo sapiens GN=USP5 PE=1 SV=2	95.725	284.8	245.2	285	400	374.5	334.6	275.5	361.5	0.688	0	261.81	10	2561.1	942
A0A0C4DFN1	Mitofusin-1 OS=Homo sapiens GN=MFN1 PE=1 SV=1	84.106	330.1	251.5	245.7	278.9	497.4	374.3	259.6	321.2	0.372	0	136.513	7	2558.7	943
P30153	Serine/threonine-protein phosphatase 2A 65 kDa regulatory subunit A alpha isoform OS=Homo sapiens GN=PPP2R1A PE=1 SV=4	65.267	289.6	258	313.2	400.2	341.2	332.8	296.3	325.1	0.805	1	246.233	9	2556.4	944
Q96F86	Enhancer of mRNA-decapping protein 3 OS=Homo sapiens GN=EDC3 PE=1 SV=1	56.042	285.7	256.3	261.1	355.6	398.2	343.8	281.3	373	0.682	0	173.197	7	2555	945
P62191	26S protease regulatory subunit 4 OS=Homo sapiens GN=PSMC1 PE=1 SV=1	49.154	321.3	262.4	288.2	367.4	396.7	343.6	271.9	298.9	1.096	0	161.025	7	2550.4	946
O60264	SWI/SNF-related matrix-associated actin-dependent regulator of chromatin subfamily A member 5 OS=Homo sapiens GN=SMARCA5 PE=1 SV=1	121.828	335.9	289.8	256.7	350.9	375.3	379.9	238	309.8	0.267	0	37.4	7	2536.3	947
Q9BT22	Chitobiosyldiphosphodolichol beta-mannosyltransferase OS=Homo sapiens GN=ALG1 PE=1 SV=2	52.484	313	266.6	254	337	428.7	339.1	265.9	330.4	1.154	0	151.307	8	2534.7	948
Q587I9	Vesicle transport protein SFT2C OS=Homo sapiens GN=SFT2D3 PE=2 SV=1	21.776	316.5	329.8	324	381.7	329.9	311.4	251.3	286.9	1.848	0	150.383	3	2531.5	949
A2RRP1	Neuroblastoma-amplified sequence OS=Homo sapiens GN=NBAS PE=1 SV=2	268.401	315.7	239.5	254.6	319	432.8	376.3	269.5	318.2	0.121	0	88.4967	7	2525.6	950
P11216	Glycogen phosphorylase, brain form OS=Homo sapiens GN=PYGB PE=1 SV=5	96.635	285.1	269.9	284.4	350.3	368.8	317.8	300.4	340.2	0.327	0	88.13	7	2516.9	951
O95602	DNA-directed RNA polymerase I subunit RPA1 OS=Homo sapiens GN=POLR1A PE=1 SV=2	194.687	366.1	269.1	241.3	286.8	462.1	358	256.6	276.3	0.088	0	38.79	4	2516.3	952
Q14978-2	Isoform Beta of Nucleolar and coiled-body phosphoprotein 1 OS=Homo sapiens GN=NOLC1	74.702	318.7	281.8	247.9	378.5	349.4	357.8	239	341.5	0.278	0	39.2767	5	2514.6	953
Q9Y5Q8-3	Isoform 3 of General transcription factor 3C polypeptide 5 OS=Homo sapiens GN=GTF3C5	60.331	295	248.8	260.3	342.2	409.8	354.1	265.9	320.8	0.546	0	124.21	7	2496.9	954
Q9UI12	V-type proton ATPase subunit H OS=Homo sapiens GN=ATP6V1H PE=1 SV=1	55.847	296.5	258.1	293.8	399	349.9	317.9	261.5	319.2	0.389	0	173.51	4	2495.9	955
Q5SY16	Polynucleotide 5'-hydroxyl-kinase NOL9 OS=Homo sapiens GN=NOL9 PE=1 SV=1	79.272	300.6	298.7	252.2	318.8	421.6	346.5	241.5	305	1.096	0	192.325	8	2484.9	956
Q9H6K4	Optic atrophy 3 protein OS=Homo sapiens GN=OPA3 PE=1 SV=1	19.984	300.8	244.2	242.7	405	419.6	331.8	257.7	283.1	0.52	0	35.38	2	2484.9	957
P17858	ATP-dependent 6-phosphofructokinase, liver type OS=Homo sapiens GN=PFKL PE=1 SV=6	84.964	374.7	256.7	286.7	322.4	431.7	323.8	209.5	267.7	0.506	0	189.827	8	2473.2	958
Q9BV38	WD repeat-containing protein 18 OS=Homo sapiens GN=WDR18 PE=1 SV=2	47.375	311.8	253.7	253.7	332	364.9	328.1	266.8	360.5	0.369	0	114.94	3	2471.5	959
P16455	Methylated-DNA--protein-cysteine methyltransferase OS=Homo sapiens GN=MGMT PE=1 SV=1	21.632	301.2	245	291.7	395.2	317.7	306.6	268.7	335.2	1.154	0	137.72	3	2461.3	960
Q9Y266	Nuclear migration protein nudC OS=Homo sapiens GN=NUDC PE=1 SV=1	38.219	301.5	226.3	288.8	388.2	359.9	310.6	273.6	306.5	1.721	0	177.627	7	2455.4	961
Q6P3X3	Tetratricopeptide repeat protein 27 OS=Homo sapiens GN=TTC27 PE=1 SV=1	96.571	339.9	259.3	252	335.4	412.8	313.3	241.2	299.3	0.271	0	108.83	5	2453.2	962
Q9GZR2	RNA exonuclease 4 OS=Homo sapiens GN=REXO4 PE=1 SV=2	46.643	375.6	249.8	200.8	254.2	473.1	349.4	239.9	307.2	0.359	0	75.8033	5	2450	963
O43505	Beta-1,4-glucuronyltransferase 1 OS=Homo sapiens GN=B4GAT1 PE=1 SV=1	47.089	259.5	231.8	223.4	288.4	415.1	385.8	296.5	346.3	0.995	0	210.153	6	2446.8	964
Q96SK2	Transmembrane protein 209 OS=Homo sapiens GN=TMEM209 PE=1 SV=2	62.881	341.5	256.2	257.4	309.6	416.7	338.1	247.7	278.3	0.585	0	81.98	6	2445.5	965
Q5T160	Probable arginine--tRNA ligase, mitochondrial OS=Homo sapiens GN=RARS2 PE=1 SV=1	65.464	299	260.9	247.9	313.5	427.3	340.7	240	315.2	0.995	0	253.79	11	2444.5	966
O15504	Nucleoporin-like protein 2 OS=Homo sapiens GN=NUPL2 PE=1 SV=1	44.844	414.5	269	191.3	201.9	540.8	353.8	225.6	243.1	0.585	0	55.9061	4	2440	967
Q9NPH0	Lysophosphatidic acid phosphatase type 6 OS=Homo sapiens GN=ACP6 PE=1 SV=2	48.823	282.6	235	277.8	354.3	360.3	317.5	283.3	325.7	0.369	0	75.3067	2	2436.5	968
P30041	Peroxiredoxin-6 OS=Homo sapiens GN=PRDX6 PE=1 SV=3	25.019	293.9	233.4	281	380.1	346	347.6	245.3	300.4	2.162	0	206.93	7	2427.7	969
D6RBT3	NADH dehydrogenase [ubiquinone] iron-sulfur protein 6, mitochondrial OS=Homo sapiens GN=NDUFS6 PE=1 SV=1	18.74	271.2	243.2	239.9	331	361.9	362.7	266	350.9	1.371	0	181.377	3	2426.8	970
Q5U3C3	Transmembrane protein 164 OS=Homo sapiens GN=TMEM164 PE=2 SV=1	33.486	287.6	255.5	255.9	299.6	389.5	314.8	270.9	340.6	0.468	0	33.03	2	2414.4	971
Q01780	Exosome component 10 OS=Homo sapiens GN=EXOSC10 PE=1 SV=2	100.768	391.4	253.2	180.2	211.7	503.9	336.2	242.1	294.6	0.201	0	103.61	5	2413.3	972
Q8TEQ6	Gem-associated protein 5 OS=Homo sapiens GN=GEMIN5 PE=1 SV=3	168.483	303.5	249.3	271.4	347.9	363.2	309.4	260.1	304.8	0.181	0	165.293	7	2409.6	973
H7BZJ3	Protein disulfide-isomerase A3 (Fragment) OS=Homo sapiens GN=PDIA3 PE=1 SV=1	13.511	296	229.9	229.4	296	395	321.8	265	368	11.915	0	207.9	5	2401.1	974
Q96AA3	Protein RFT1 homolog OS=Homo sapiens GN=RFT1 PE=1 SV=1	60.296	300.2	259.6	267.9	338.6	344.6	315.9	243.3	329.9	0.532	0	42.6767	4	2400	975
P08727	Keratin, type I cytoskeletal 19 OS=Homo sapiens GN=KRT19 PE=1 SV=4	44.079	292.4	243.8	237.4	318.6	418.8	343	249.9	295.4	0.748	0	126.84	7	2399.3	976
P23284	Peptidyl-prolyl cis-trans isomerase B OS=Homo sapiens GN=PPIB PE=1 SV=2	23.728	299.6	265.2	299.6	395.9	315	305.8	243.6	274	1.738	0	172.63	5	2398.7	977
A0A0G2JJD3	HLA-B associated transcript 5, isoform CRA_b OS=Homo sapiens GN=ABHD16A PE=1 SV=1	67.476	313.6	245.6	250	330.8	386.8	326.4	251.7	292.1	0.403	0	82.3	5	2397	978
Q13217	DnaJ homolog subfamily C member 3 OS=Homo sapiens GN=DNAJC3 PE=1 SV=1	57.544	270.9	184.4	203.4	331.9	384.7	306.8	279.5	433.6	0.233	0	62.0533	3	2395.2	979
F8VXY1	Ceramide synthase 5 OS=Homo sapiens GN=CERS5 PE=1 SV=1	41.155	303	260.1	260.4	303.9	368.4	318	260.6	309.8	0.413	0	30.11	2	2384.2	980
Q96IV0	Peptide-N(4)-(N-acetyl-beta-glucosaminyl)asparagine amidase OS=Homo sapiens GN=NGLY1 PE=1 SV=1	74.343	289.5	233	240.6	325.1	388.5	325.4	260.6	308.7	0.179	0	44.68	3	2371.4	981
M0R2Z9	SURP and G-patch domain-containing protein 2 OS=Homo sapiens GN=SUGP2 PE=1 SV=1	121.468	323.4	261.5	211.6	275.6	438.2	325.1	240.6	292.1	0.197	0	77.1833	5	2368.1	982
O14524	Nuclear envelope integral membrane protein 1 OS=Homo sapiens GN=NEMP1 PE=1 SV=2	50.607	265.6	248.5	232	300.9	391.4	336.3	262.5	328	0.468	0	47.06	4	2365.2	983
Q9BRJ7	Protein syndesmos OS=Homo sapiens GN=NUDT16L1 PE=1 SV=1	23.323	279.5	218.9	250	353	340.1	307.5	281.5	334.4	3.217	0	183.83	8	2364.9	984
Q9NYM9	BET1-like protein OS=Homo sapiens GN=BET1L PE=1 SV=1	12.38	274.5	268.8	262.6	307.9	354.9	339.9	253.1	302.9	1.154	0	78.1633	3	2364.6	985
F8W031	Uncharacterized protein (Fragment) OS=Homo sapiens PE=1 SV=1	29.206	232.8	230.7	299.3	343.2	297.9	297.5	303.5	357.6	0.896	0	171.673	5	2362.5	986
P47897	Glutamine--tRNA ligase OS=Homo sapiens GN=QARS PE=1 SV=1	87.743	287.5	231.4	286.9	354.9	327.1	307.5	254.7	310.7	0.643	0	228.425	11	2360.7	987
Q9P032	NADH dehydrogenase [ubiquinone] 1 alpha subcomplex assembly factor 4 OS=Homo sapiens GN=NDUFAF4 PE=1 SV=1	20.254	304.9	254.6	246.8	318.4	350	354	261.3	269.1	1.512	0	134.324	6	2359.1	988
Q5T440	Putative transferase CAF17, mitochondrial OS=Homo sapiens GN=IBA57 PE=1 SV=1	38.131	264.5	235.5	258.9	337.7	312.4	311.8	272.4	362.3	1.683	0	311.87	8	2355.5	989
Q9Y3P4	Rhomboid domain-containing protein 3 OS=Homo sapiens GN=RHBDD3 PE=2 SV=1	40.458	242.7	259.2	280.8	357.7	355.8	304.2	261.6	291.1	0.52	0	40.47	2	2353.1	990
P03891	NADH-ubiquinone oxidoreductase chain 2 OS=Homo sapiens GN=MT-ND2 PE=1 SV=2	38.935	223.1	223.4	222.4	298	294.9	376.8	312.3	396.1	0.334	0	42.6	1	2347	991
P62316	Small nuclear ribonucleoprotein Sm D2 OS=Homo sapiens GN=SNRPD2 PE=1 SV=1	13.518	295	228.6	229.2	308.9	358.2	364.5	259.3	300.1	1.154	0	78.8	3	2343.8	992
Q8WX93	Palladin OS=Homo sapiens GN=PALLD PE=1 SV=3	150.47	265	226.1	275.5	382.3	288.2	304.7	270	330.5	0.199	0	147.43	6	2342.3	993
P98194-3	Isoform 3 of Calcium-transporting ATPase type 2C member 1 OS=Homo sapiens GN=ATP2C1	101.098	325.2	314.8	314.7	349.7	270.5	281.8	225.3	251.8	0.643	0	182.151	10	2333.8	994
O15120	1-acyl-sn-glycerol-3-phosphate acyltransferase beta OS=Homo sapiens GN=AGPAT2 PE=1 SV=1	30.894	295.9	236.3	220.6	266	398.6	302.9	255.6	356.6	1.154	0	74.14	4	2332.5	995
O94766	Galactosylgalactosylxylosylprotein 3-beta-glucuronosyltransferase 3 OS=Homo sapiens GN=B3GAT3 PE=1 SV=2	37.099	255.5	240.9	243	304.7	370.3	333.5	256.4	327.5	0.438	0	52.17	3	2331.8	996
O76094	Signal recognition particle subunit SRP72 OS=Homo sapiens GN=SRP72 PE=1 SV=3	74.56	306	218	209.5	290.8	446.8	350.5	224.6	283.6	1.04	0	252.328	12	2329.8	997
A9Z1X7	Serine/arginine repetitive matrix protein 1 OS=Homo sapiens GN=SRRM1 PE=1 SV=1	103.329	316.8	261.7	216.1	322.3	319.2	326.9	228.8	336.8	0.044	0	0	1	2328.6	998
Q92575	UBX domain-containing protein 4 OS=Homo sapiens GN=UBXN4 PE=1 SV=2	56.743	273.4	231.9	238.1	280	373.9	356.1	265.7	308.6	0.624	0	214.37	4	2327.7	999
P62736	Actin, aortic smooth muscle OS=Homo sapiens GN=ACTA2 PE=1 SV=1	41.982	246.1	188.5	289.7	401.4	319.4	329.8	264.2	283.9	5.062	0	633.077	10	2323	1000
Q13155	Aminoacyl tRNA synthase complex-interacting multifunctional protein 2 OS=Homo sapiens GN=AIMP2 PE=1 SV=2	35.326	258.4	215.5	257.5	344	350.8	315.1	247.5	327	0.585	0	112.747	4	2315.8	1001
O00541	Pescadillo homolog OS=Homo sapiens GN=PES1 PE=1 SV=1	67.96	329.3	259.1	208.3	281.5	377.9	326.6	238.5	287.5	0.438	0	73.13	6	2308.7	1002
Q9HCC0	Methylcrotonoyl-CoA carboxylase beta chain, mitochondrial OS=Homo sapiens GN=MCCC2 PE=1 SV=1	61.294	296.7	226.5	241.8	345.5	340.5	301.8	229.9	324.3	0.484	0	206.74	6	2307	1003
P40616	ADP-ribosylation factor-like protein 1 OS=Homo sapiens GN=ARL1 PE=1 SV=1	20.404	272.3	228.4	259.2	337	312.8	302.9	269.2	322.8	2.162	0	116.6	4	2304.6	1004
Q969T9	WW domain-binding protein 2 OS=Homo sapiens GN=WBP2 PE=1 SV=1	28.068	273.5	250.5	241	319.8	336.2	313.5	261.5	306.3	0.995	0	82.05	3	2302.3	1005
Q14694-2	Isoform 2 of Ubiquitin carboxyl-terminal hydrolase 10 OS=Homo sapiens GN=USP10	92.54	288.4	222.3	229.9	330.9	336.7	309.5	247.1	332.4	0.602	0	79.8	9	2297.2	1006
O60547	GDP-mannose 4,6 dehydratase OS=Homo sapiens GN=GMDS PE=1 SV=1	41.923	260.5	229	276.6	378	286.9	279	258.6	326.1	0.848	0	43.54	7	2294.7	1007
Q14690	Protein RRP5 homolog OS=Homo sapiens GN=PDCD11 PE=1 SV=3	208.57	314.7	263.6	212	274.7	361.2	324.8	250.7	289.6	0.148	0	98.65	6	2291.3	1008
M0QZ12	GRAM domain-containing protein 1A OS=Homo sapiens GN=GRAMD1A PE=1 SV=1	89.68	250.9	230.3	257	343.9	320.7	297.5	251.4	332.8	0.278	0	88.7655	5	2284.5	1009
Q53EU6	Glycerol-3-phosphate acyltransferase 3 OS=Homo sapiens GN=GPAT3 PE=1 SV=2	48.673	272.6	250.8	248.5	296.5	378.2	305.4	243.4	288.5	0.407	0	124.958	4	2283.9	1010
O95168	NADH dehydrogenase [ubiquinone] 1 beta subcomplex subunit 4 OS=Homo sapiens GN=NDUFB4 PE=1 SV=3	15.199	253	225.7	235.3	311	341.1	347.7	262.4	302.7	2.162	0	127.78	4	2278.9	1011
Q99720	Sigma non-opioid intracellular receptor 1 OS=Homo sapiens GN=SIGMAR1 PE=1 SV=1	25.112	272.5	247	259.4	273.1	382.7	303.1	246.9	286.8	1.783	0	90.62	3	2271.5	1012
O15294	UDP-N-acetylglucosamine--peptide N-acetylglucosaminyltransferase 110 kDa subunit OS=Homo sapiens GN=OGT PE=1 SV=3	116.85	271.5	230.9	258.6	326.4	336.9	301.1	237.5	308.3	0.292	0	70.24	5	2271.2	1013
O75934	Pre-mRNA-splicing factor SPF27 OS=Homo sapiens GN=BCAS2 PE=1 SV=1	26.115	291.7	235	206.9	266.5	383.5	331.3	242.6	311.7	0.931	0	105.827	4	2269.2	1014
O14936	Peripheral plasma membrane protein CASK OS=Homo sapiens GN=CASK PE=1 SV=3	105.056	267.4	219.2	254.9	358.7	305.5	280.4	256.2	323.4	0.269	0	47.3433	5	2265.7	1015
A0A024R4E5	High density lipoprotein binding protein (Vigilin), isoform CRA_a OS=Homo sapiens GN=HDLBP PE=1 SV=1	141.352	271	196.7	224.3	270.2	433.4	318	245.6	294.1	0.255	0	104.903	8	2253.3	1016
O75787	Renin receptor OS=Homo sapiens GN=ATP6AP2 PE=1 SV=2	38.983	271.6	272.8	299.3	323.6	301	288.1	225.2	271.4	1.581	0	100.427	6	2253	1017
B3KQ09	cDNA FLJ32577 fis, clone SPLEN2000255 OS=Homo sapiens PE=2 SV=1	24.632	335.5	239.3	198.4	253.6	440.1	329.3	211.9	242.3	0.585	0	61.09	2	2250.4	1018
Q9NZJ0	Denticleless protein homolog OS=Homo sapiens GN=DTL PE=1 SV=3	79.417	314.4	235.9	235.3	268.6	402.5	311.8	213	265.7	0.122	0	39.72	2	2247.2	1019
A6NIZ1	Ras-related protein Rap-1b-like protein OS=Homo sapiens PE=2 SV=1	20.912	238.3	247.4	266.1	331.9	279.1	319	251.2	312.3	1.61	0	119.997	5	2245.3	1020
P40763	Signal transducer and activator of transcription 3 OS=Homo sapiens GN=STAT3 PE=1 SV=2	88.011	250.6	230.8	240.1	348.5	317.2	289.7	264.2	301.3	0.632	0	83.1886	8	2242.4	1021
Q6P1Q9	Methyltransferase-like protein 2B OS=Homo sapiens GN=METTL2B PE=1 SV=3	43.398	252.9	204	236.9	318.7	346.1	309.4	247.5	311.1	0.905	3	102.96	7	2226.6	1022
Q8WU90	Zinc finger CCCH domain-containing protein 15 OS=Homo sapiens GN=ZC3H15 PE=1 SV=1	48.573	263.1	219.4	223.5	261.9	358.4	323.5	253.4	323.2	0.359	0	63.5533	4	2226.4	1023
O00767	Acyl-CoA desaturase OS=Homo sapiens GN=SCD PE=1 SV=2	41.496	248.1	285.4	272.9	278.2	286.3	308.3	238.4	305.3	1.336	0	168.309	6	2222.9	1024
Q6UW68	Transmembrane protein 205 OS=Homo sapiens GN=TMEM205 PE=1 SV=1	21.184	251.6	222.1	257	327	323.1	288.9	256.9	294.7	5.813	0	173.9	3	2221.3	1025
O75027-2	Isoform 2 of ATP-binding cassette sub-family B member 7, mitochondrial OS=Homo sapiens GN=ABCB7	82.717	280	244.2	227.4	298	320.9	305.7	237.8	304.3	0.389	0	90.7571	6	2218.3	1026
Q13491-4	Isoform 4 of Neuronal membrane glycoprotein M6-b OS=Homo sapiens GN=GPM6B	36.196	248.5	265.7	267	335.1	310.6	306.4	220.9	262	0.425	0	0	2	2216.2	1027
Q8WUM0	Nuclear pore complex protein Nup133 OS=Homo sapiens GN=NUP133 PE=1 SV=2	128.898	297.8	218.1	235.6	293.6	399.4	300.6	225.4	243.2	0.194	0	78	5	2213.7	1028
O60566-3	Isoform 3 of Mitotic checkpoint serine/threonine-protein kinase BUB1 beta OS=Homo sapiens GN=BUB1B	121.31	274.4	232.3	235.5	324.2	385.4	305.6	234.3	221.5	0.311	0	162.544	7	2213.2	1029
Q9BUV8-5	Isoform 5 of Uncharacterized protein C20orf24 OS=Homo sapiens GN=C20orf24	15.883	234	232.3	242.7	312.7	288.7	291	280.6	330.1	0.668	0	32.09	2	2212.1	1030
Q15717-2	Isoform 2 of ELAV-like protein 1 OS=Homo sapiens GN=ELAVL1	38.972	272.2	236.5	223.9	304.3	349.3	303.5	243.7	278	0.778	0	129.103	5	2211.4	1031
Q8NE86	Calcium uniporter protein, mitochondrial OS=Homo sapiens GN=MCU PE=1 SV=1	39.842	243	211.3	223.7	294.7	332.9	324.4	260.1	318.6	0.624	0	111.54	4	2208.7	1032
Q96PU8	Protein quaking OS=Homo sapiens GN=QKI PE=1 SV=1	37.647	250.9	209.7	242.5	341.2	302.9	288.9	251.2	316.8	0.668	0	87.3133	4	2204.1	1033
Q13185	Chromobox protein homolog 3 OS=Homo sapiens GN=CBX3 PE=1 SV=4	20.798	254.4	229	224.1	325.8	306.4	289.2	255.4	318.6	2.162	0	64.66	5	2202.9	1034
E7EVA0	Microtubule-associated protein OS=Homo sapiens GN=MAP4 PE=1 SV=1	245.292	249.6	210.3	255	319.1	335.3	295.8	238.7	297.5	0.081	2	61.25	5	2201.3	1035
H3BN98	Uncharacterized protein (Fragment) OS=Homo sapiens PE=4 SV=2	27.15	271.1	230.3	226.4	260.4	372.2	310.8	233.7	295.2	6.017	0	455.069	6	2200.1	1036
Q96K37	Solute carrier family 35 member E1 OS=Homo sapiens GN=SLC35E1 PE=1 SV=2	44.744	299.7	278.6	276.8	311.1	295.2	257.1	215.7	263.7	0.54	0	100.523	2	2197.9	1037
O75223	Gamma-glutamylcyclotransferase OS=Homo sapiens GN=GGCT PE=1 SV=1	20.994	231.8	204.4	244.9	365.8	259.5	298.8	279.6	309.9	0.638	0	58.11	2	2194.7	1038
P35520-2	Isoform 2 of Cystathionine beta-synthase OS=Homo sapiens GN=CBS	61.824	254.3	235.1	259.6	345.9	317	272.7	222.4	281.8	0.682	0	69.9167	6	2188.8	1039
Q9NVE7	Pantothenate kinase 4 OS=Homo sapiens GN=PANK4 PE=1 SV=1	85.937	295.6	222.7	206.2	301.1	380.4	289.4	225	265.9	0.238	0	60.4233	5	2186.3	1040
Q9Y606	tRNA pseudouridine synthase A, mitochondrial OS=Homo sapiens GN=PUS1 PE=1 SV=3	47.44	258.2	205.7	231.5	316.1	359.9	295.2	239.9	277.7	0.334	0	39.38	4	2184.2	1041
P78362-2	Isoform 2 of SRSF protein kinase 2 OS=Homo sapiens GN=SRPK2	78.979	284.4	220.1	207.4	258.7	408.5	306.7	229	263.6	0.52	0	109.56	6	2178.4	1042
Q9NZL9	Methionine adenosyltransferase 2 subunit beta OS=Homo sapiens GN=MAT2B PE=1 SV=1	37.528	253.9	224.5	254	321	300.9	279.3	247.3	292.1	0.73	0	108.52	5	2173	1043
P00156	Cytochrome b OS=Homo sapiens GN=MT-CYB PE=1 SV=2	42.689	256.9	220.1	214.6	273.5	308.6	338.8	272.4	282.3	0.468	0	17.59	1	2167.2	1044
Q01105	Protein SET OS=Homo sapiens GN=SET PE=1 SV=3	33.469	187.5	161.7	284.8	395.7	281.3	285.3	260.5	303.6	0.778	0	106.203	3	2160.4	1045
Q86UP2	Kinectin OS=Homo sapiens GN=KTN1 PE=1 SV=1	156.179	183.2	186.3	232.5	262.6	234.3	267.3	361.2	429.9	0.075	0	43.12	3	2157.3	1046
P07919	Cytochrome b-c1 complex subunit 6, mitochondrial OS=Homo sapiens GN=UQCRH PE=1 SV=2	10.732	227	236.7	227.9	282	273	350.4	259.1	297.8	9	0	79.2843	5	2153.9	1047
Q9BQT8	Mitochondrial 2-oxodicarboxylate carrier OS=Homo sapiens GN=SLC25A21 PE=1 SV=1	33.282	329.2	242.3	219.5	308.2	313.6	288	195.8	254.7	0.274	0	25.67	2	2151.3	1048
A6NEM2	Host cell factor 1 OS=Homo sapiens GN=HCFC1 PE=1 SV=2	213.343	273.2	218.8	216	314.1	321.1	285.6	229.8	291.6	0.164	0	82.06	5	2150.2	1049
Q86TM6	E3 ubiquitin-protein ligase synoviolin OS=Homo sapiens GN=SYVN1 PE=1 SV=2	67.64	258.5	276	209.5	263.4	263.8	328.6	273.4	274.9	0.905	0	155.76	6	2148.1	1050
Q92769	Histone deacetylase 2 OS=Homo sapiens GN=HDAC2 PE=1 SV=2	55.329	276.1	229	240	274	360.1	293.3	215.5	259.4	0.931	0	61.31	6	2147.4	1051
Q6P4E1-4	Isoform 4 of Protein CASC4 OS=Homo sapiens GN=CASC4	49.468	246.8	233	257.1	338.2	301.1	300.8	215.7	254.4	0.389	0	56.22	3	2147.1	1052
Q96CN7	Isochorismatase domain-containing protein 1 OS=Homo sapiens GN=ISOC1 PE=1 SV=3	32.216	251.1	224.1	250.6	318.5	275	274.6	244.1	304.6	0.155	0	30.57	1	2142.6	1053
P62273-2	Isoform 2 of 40S ribosomal protein S29 OS=Homo sapiens GN=RPS29	8.082	288.1	215.1	183.3	245.4	423.8	293.3	204.8	283.1	9	0	87.45	2	2136.9	1054
Q9H6S0	Probable ATP-dependent RNA helicase YTHDC2 OS=Homo sapiens GN=YTHDC2 PE=1 SV=2	160.147	282.7	212.4	203.6	268.9	342.8	281.8	216.9	319	0.191	0	106.13	7	2128.1	1055
O95167	NADH dehydrogenase [ubiquinone] 1 alpha subcomplex subunit 3 OS=Homo sapiens GN=NDUFA3 PE=1 SV=1	9.273	243.4	216.2	203.8	261.1	271.6	352.7	260.6	308.8	0.585	0	35.58	1	2118.2	1056
Q9BVQ7	Spermatogenesis-associated protein 5-like protein 1 OS=Homo sapiens GN=SPATA5L1 PE=1 SV=2	80.66	283.7	211.5	213.8	272.5	355.5	304.1	222.2	254.9	0.17	0	53.97	3	2118.2	1057
P78347	General transcription factor II-I OS=Homo sapiens GN=GTF2I PE=1 SV=2	112.346	245.5	204.5	234.4	283.6	363.4	290.6	231.6	263.4	0.204	0	56.26	5	2117	1058
P62304	Small nuclear ribonucleoprotein E OS=Homo sapiens GN=SNRPE PE=1 SV=1	10.797	280.2	251.4	170.8	241.6	375.9	298.2	232.5	265.5	2.162	0	69.54	2	2116.1	1059
Q01081	Splicing factor U2AF 35 kDa subunit OS=Homo sapiens GN=U2AF1 PE=1 SV=3	27.854	251	196.1	192.5	279.7	392.1	284.6	229.5	287.1	0.778	0	128.16	3	2112.6	1060
Q13085-4	Isoform 4 of Acetyl-CoA carboxylase 1 OS=Homo sapiens GN=ACACA	269.827	243.6	202.4	237.5	311	332.9	270.9	242.3	268.5	0.154	0	87.9833	10	2109.1	1061
O95487-3	Isoform 3 of Protein transport protein Sec24B OS=Homo sapiens GN=SEC24B	140.333	246.2	240.1	286.5	354.7	260.9	255.3	205.6	259.8	0.602	1	104.51	8	2109.1	1062
Q9NXW9	Alpha-ketoglutarate-dependent dioxygenase alkB homolog 4 OS=Homo sapiens GN=ALKBH4 PE=1 SV=1	33.816	244.8	221.3	217.7	296.3	323	276	247.9	277.1	1.448	0	285.639	7	2104.1	1063
Q9NUQ7	Ufm1-specific protease 2 OS=Homo sapiens GN=UFSP2 PE=1 SV=3	53.227	243.9	197.7	219.8	288.5	330.1	290.8	240.2	292.1	0.194	0	83.05	2	2103.1	1064
P35250	Replication factor C subunit 2 OS=Homo sapiens GN=RFC2 PE=1 SV=3	39.132	264.2	211	200.7	260.6	368.7	301.3	217.5	271.4	0.445	0	146.4	3	2095.4	1065
Q99758	ATP-binding cassette sub-family A member 3 OS=Homo sapiens GN=ABCA3 PE=1 SV=2	191.239	206.7	204.1	255.7	335.3	257.9	258.1	254.6	312.1	0.078	0	40.75	3	2084.5	1066
Q96GQ7	Probable ATP-dependent RNA helicase DDX27 OS=Homo sapiens GN=DDX27 PE=1 SV=2	89.779	321.1	241.4	177.8	238.2	375.4	291.6	196.8	240.9	0.359	0	142.603	6	2083.2	1067
P57678	Gem-associated protein 4 OS=Homo sapiens GN=GEMIN4 PE=1 SV=2	119.96	265.3	219.3	224.7	288.2	345.5	271.9	212.1	256	0.346	0	153.738	7	2083	1068
P20810-6	Isoform 6 of Calpastatin OS=Homo sapiens GN=CAST	84.891	225	198.4	239	331.4	289.1	278.3	245.9	275.8	0.162	0	28.83	3	2082.9	1069
Q9BVT8	Transmembrane and ubiquitin-like domain-containing protein 1 OS=Homo sapiens GN=TMUB1 PE=1 SV=1	26.245	244.2	235.9	260.9	296.1	272.6	280.9	208.3	282.6	2.162	0	97.2667	3	2081.5	1070
Q9Y3D9	28S ribosomal protein S23, mitochondrial OS=Homo sapiens GN=MRPS23 PE=1 SV=2	21.757	243.8	189	239.8	361.6	329.9	267.7	200.7	248.1	0.701	0	79.24	3	2080.6	1071
P29353-6	Isoform 6 of SHC-transforming protein 1 OS=Homo sapiens GN=SHC1	62.854	264.9	250	246.7	308.9	270.3	248.3	211.5	273.3	0.166	0	49.72	2	2073.9	1072
J3QRS3	Myosin regulatory light chain 12A OS=Homo sapiens GN=MYL12A PE=1 SV=1	20.444	222.1	185.2	231.9	306.7	285.2	305.9	251.6	279	0.778	0	49.9133	3	2067.6	1073
Q01650	Large neutral amino acids transporter small subunit 1 OS=Homo sapiens GN=SLC7A5 PE=1 SV=2	54.974	237.4	214.2	274.2	327.7	270.4	272.9	226.4	244	0.585	0	118.88	4	2067.2	1074
P54819	Adenylate kinase 2, mitochondrial OS=Homo sapiens GN=AK2 PE=1 SV=2	26.461	313.1	207.2	188.7	231.6	368.1	294.8	196.6	264.3	0.968	0	82.2	5	2064.4	1075
Q14137	Ribosome biogenesis protein BOP1 OS=Homo sapiens GN=BOP1 PE=1 SV=2	83.577	276.7	226.4	200.8	263.9	330.4	295.7	207.9	255.9	0.307	0	41.84	4	2057.7	1076
J3KPP4	Cisplatin resistance-associated overexpressed protein, isoform CRA_b OS=Homo sapiens GN=LUC7L3 PE=1 SV=1	58.185	252.1	201.4	207.9	308.6	296.4	279.8	216	292.4	0.778	0	171.37	6	2054.6	1077
B4DZM6	Membrane-associated tyrosine- and threonine-specific cdc2-inhibitory kinase OS=Homo sapiens GN=PKMYT1 PE=1 SV=1	61.67	232	209.7	207.3	279	396.3	268.2	208.9	252.8	0.445	0	61.7233	4	2054.2	1078
Q6P2E9	Enhancer of mRNA-decapping protein 4 OS=Homo sapiens GN=EDC4 PE=1 SV=1	151.567	205.7	179.8	207.3	295	274.7	256.8	233.5	395.8	0.233	0	103.03	6	2048.6	1079
Q9UHX1	Poly(U)-binding-splicing factor PUF60 OS=Homo sapiens GN=PUF60 PE=1 SV=1	59.838	252.5	214	188.9	270.1	346.1	287.3	223.6	261.2	0.25	0	50.6433	3	2043.7	1080
Q8NB49	Phospholipid-transporting ATPase IG OS=Homo sapiens GN=ATP11C PE=1 SV=3	129.394	226.9	249.5	232.3	297.3	262.1	297.4	201.2	274.3	0.208	0	44.87	5	2041	1081
Q99523	Sortilin OS=Homo sapiens GN=SORT1 PE=1 SV=3	92.009	237.9	217.4	264.3	288	321.4	252	209.6	244	0.299	0	79.83	4	2034.6	1082
O75643	U5 small nuclear ribonucleoprotein 200 kDa helicase OS=Homo sapiens GN=SNRNP200 PE=1 SV=2	244.353	238	215.8	209.4	292.6	338.2	303.2	214.9	221.9	0.176	0	130.495	9	2034	1083
P63104	14-3-3 protein zeta/delta OS=Homo sapiens GN=YWHAZ PE=1 SV=1	27.728	235.1	118.6	176.2	369	363.6	183.8	177.8	409.8	3.833	0	282.447	9	2033.9	1084
B3KPC1	Protein pelota homolog OS=Homo sapiens PE=2 SV=1	43.351	238.6	201.5	228.8	286.5	324.1	277.7	211.2	261.2	0.817	0	108.683	7	2029.6	1085
P17655	Calpain-2 catalytic subunit OS=Homo sapiens GN=CAPN2 PE=1 SV=6	79.945	215.3	178.4	224.6	306.2	302.2	264.3	245.5	290.9	0.438	0	135.23	5	2027.4	1086
Q96I24	Far upstream element-binding protein 3 OS=Homo sapiens GN=FUBP3 PE=1 SV=2	61.602	244.5	200.9	193.7	250.3	351.3	318.8	208	259	0.528	0	115.27	7	2026.5	1087
Q8NI22	Multiple coagulation factor deficiency protein 2 OS=Homo sapiens GN=MCFD2 PE=1 SV=1	16.38	209.5	257.3	367	370.5	214.6	228.4	207.8	165.4	1.154	0	44.42	1	2020.5	1088
Q96T76-8	Isoform 5 of MMS19 nucleotide excision repair protein homolog OS=Homo sapiens GN=MMS19	115.631	238.6	207.7	215.8	258.8	335.4	266	229	264.7	0.122	0	57.6667	3	2016	1089
Q15637-6	Isoform 6 of Splicing factor 1 OS=Homo sapiens GN=SF1	61.85	247.2	194.1	201.2	266	322.8	272.1	207.8	302.5	1.336	0	139.05	6	2013.7	1090
P09622	Dihydrolipoyl dehydrogenase, mitochondrial OS=Homo sapiens GN=DLD PE=1 SV=2	54.143	272.8	198.6	210.1	250.3	325	264	205.1	287.1	0.359	0	33.9167	5	2013	1091
Q04637-9	Isoform 9 of Eukaryotic translation initiation factor 4 gamma 1 OS=Homo sapiens GN=EIF4G1	176.128	231.6	187.2	238.6	297.4	306.2	262.1	219.8	268.3	0.197	0	92.1	6	2011.2	1092
Q9H3P7	Golgi resident protein GCP60 OS=Homo sapiens GN=ACBD3 PE=1 SV=4	60.556	207	189.7	212.3	282.7	301.4	287.9	231.4	283.9	0.492	0	109.14	4	1996.3	1093
P84085	ADP-ribosylation factor 5 OS=Homo sapiens GN=ARF5 PE=1 SV=2	20.517	219.5	263.8	304.3	305	244.3	238.2	195.6	222	1.031	1	69.14	4	1992.7	1094
P15104	Glutamine synthetase OS=Homo sapiens GN=GLUL PE=1 SV=4	42.037	233	200.6	218.7	267.4	294.9	267.1	216.1	289.4	0.585	0	30.39	4	1987.2	1095
Q9Y2G8	DnaJ homolog subfamily C member 16 OS=Homo sapiens GN=DNAJC16 PE=2 SV=3	90.534	211.7	195.9	206.2	265.3	292.4	243.3	225.1	336.8	0.571	0	162.625	9	1976.7	1096
E7EQZ4	Survival motor neuron protein OS=Homo sapiens GN=SMN1 PE=1 SV=1	31.669	220.6	206.5	211.7	290.5	302.8	266.2	210.9	265	0.874	0	56.75	2	1974.2	1097
Q9Y385	Ubiquitin-conjugating enzyme E2 J1 OS=Homo sapiens GN=UBE2J1 PE=1 SV=2	35.177	246.2	221.6	205.7	237	337.8	339.6	126.8	256.6	3.217	0	192.145	7	1971.3	1098
P35221-2	Isoform 2 of Catenin alpha-1 OS=Homo sapiens GN=CTNNA1	102.571	237.4	199.1	208.7	284.1	292	263.9	213.3	259.5	0.172	0	57.6293	4	1958	1099
P25685	DnaJ homolog subfamily B member 1 OS=Homo sapiens GN=DNAJB1 PE=1 SV=4	38.02	240.4	210.7	202.6	245.1	343.7	277.2	208.6	229.2	0.492	0	101.5	4	1957.5	1100
P35659	Protein DEK OS=Homo sapiens GN=DEK PE=1 SV=1	42.648	240	224.2	206.1	351.3	259.3	262.3	184.6	229.7	0.778	0	119.713	5	1957.5	1101
Q9UBQ5	Eukaryotic translation initiation factor 3 subunit K OS=Homo sapiens GN=EIF3K PE=1 SV=1	25.043	224.9	182.8	195.2	263.6	353.6	274.7	236	224.9	1.154	0	90.93	4	1955.7	1102
P09496-2	Isoform Non-brain of Clathrin light chain A OS=Homo sapiens GN=CLTA	23.647	217	173.3	207.8	260.4	329.7	273.8	220.3	272.9	0.585	0	56.65	2	1955.2	1103
P61962	DDB1- and CUL4-associated factor 7 OS=Homo sapiens GN=DCAF7 PE=1 SV=1	38.901	243.5	191.2	236	287	314	244.2	198.5	240.4	1.069	0	139.83	5	1954.8	1104
P48735	Isocitrate dehydrogenase [NADP], mitochondrial OS=Homo sapiens GN=IDH2 PE=1 SV=2	50.877	256.9	214.4	209.3	219.5	335	263.6	215.3	239.9	0.25	0	113.827	3	1953.9	1105
Q13428-4	Isoform 4 of Treacle protein OS=Homo sapiens GN=TCOF1	155.836	258.4	182.4	193.9	244.4	314.3	270.5	200	289.3	0.176	0	65.3633	6	1953.2	1106
Q86SQ9-2	Isoform 2 of Dehydrodolichyl diphosphate synthase complex subunit DHDDS OS=Homo sapiens GN=DHDDS	38.761	239.9	202.8	205.4	237.9	306.4	277.7	220.5	259	0.52	0	67.0233	3	1949.6	1107
Q99700	Ataxin-2 OS=Homo sapiens GN=ATXN2 PE=1 SV=2	140.196	238.4	187.3	207.1	260	355.1	262.5	197.7	237.6	0.148	0	55.72	3	1945.7	1108
B3KMZ6	cDNA FLJ13058 fis, clone NT2RP3001587, highly similar to Ubiquitin-like 1-activating enzyme E1B OS=Homo sapiens PE=2 SV=1	71.117	216.2	206.6	216.6	276.9	266.3	266.2	230	265.7	0.468	0	104.94	6	1944.5	1109
Q8WWM7-3	Isoform 3 of Ataxin-2-like protein OS=Homo sapiens GN=ATXN2L	115.511	224.7	196.8	218.3	277	329.9	259.3	208.8	226.7	0.369	0	36.55	7	1941.5	1110
O43747-2	Isoform 2 of AP-1 complex subunit gamma-1 OS=Homo sapiens GN=AP1G1	91.664	221.1	203.8	248.9	270.2	277.5	264.8	225.3	228.2	0.292	0	66.34	4	1939.8	1111
Q13131-2	Isoform 2 of 5'-AMP-activated protein kinase catalytic subunit alpha-1 OS=Homo sapiens GN=PRKAA1	65.481	250.4	172	200.3	267.8	327.6	271.8	209.7	239.3	0.212	0	72.99	3	1938.9	1112
Q96J01	THO complex subunit 3 OS=Homo sapiens GN=THOC3 PE=1 SV=1	38.747	256.8	190.1	233.1	261	313.9	264	184.5	231.7	0.122	0	28.84	1	1935.1	1113
Q6NUM9	All-trans-retinol 13,14-reductase OS=Homo sapiens GN=RETSAT PE=1 SV=2	66.777	231.6	221.8	219	259.5	299	252.1	189.5	257	0.283	0	80.96	4	1929.5	1114
Q99943	1-acyl-sn-glycerol-3-phosphate acyltransferase alpha OS=Homo sapiens GN=AGPAT1 PE=1 SV=2	31.696	234	206.5	214.6	261.9	301	262.3	209.4	235.5	1.783	0	334.975	6	1925.2	1115
O95071	E3 ubiquitin-protein ligase UBR5 OS=Homo sapiens GN=UBR5 PE=1 SV=2	309.158	237.1	188.8	307.6	240.6	272	262.7	211.7	201.5	0.283	0	261.944	16	1922	1116
Q8N6M3	Fat storage-inducing transmembrane protein 2 OS=Homo sapiens GN=FITM2 PE=2 SV=1	29.835	236.9	226.3	209.3	250.4	303	253.6	220	217.2	0.778	0	110.643	2	1916.7	1117
Q96D53	AarF domain-containing protein kinase 4 OS=Homo sapiens GN=ADCK4 PE=1 SV=2	60.031	300.2	193.4	160.1	199.3	399.3	256.5	180.3	224.9	0.283	0	68.1867	4	1914	1118
Q00013	55 kDa erythrocyte membrane protein OS=Homo sapiens GN=MPP1 PE=1 SV=2	52.264	222.7	176.7	232.5	283.4	247.6	260.5	229.9	260.2	0.585	0	96.17	5	1913.5	1119
Q6FGF7	AF1Q protein (Fragment) OS=Homo sapiens GN=AF1Q PE=2 SV=1	10.055	251.5	179.9	214.5	210.5	389.3	260.5	192.4	212.8	1.154	0	107.17	2	1911.4	1120
Q9BW60	Elongation of very long chain fatty acids protein 1 OS=Homo sapiens GN=ELOVL1 PE=1 SV=1	32.641	196.8	222.8	195.7	241.4	248.1	277.6	222.4	305.7	1.512	0	231.263	3	1910.5	1121
P22830-2	Isoform 2 of Ferrochelatase, mitochondrial OS=Homo sapiens GN=FECH	48.594	233.4	200.1	198.6	264.5	289.2	253.1	215.6	253.5	0.25	0	88.2233	3	1908	1122
Q13043	Serine/threonine-protein kinase 4 OS=Homo sapiens GN=STK4 PE=1 SV=2	55.595	227.7	178.5	220.2	282.1	319.7	265	198.8	209.5	0.259	0	56.26	3	1901.5	1123
Q9NVH0	Exonuclease 3'-5' domain-containing protein 2 OS=Homo sapiens GN=EXD2 PE=1 SV=2	70.308	253.7	129.7	147.6	285.9	372.7	215.3	165.1	321.8	0.259	0	129.45	3	1891.8	1124
Q99816	Tumor susceptibility gene 101 protein OS=Homo sapiens GN=TSG101 PE=1 SV=2	43.916	231	175.2	172.6	269.2	312.2	256.3	220	253.1	0.624	0	40.21	4	1889.6	1125
Q9P2E5	Chondroitin sulfate glucuronyltransferase OS=Homo sapiens GN=CHPF2 PE=2 SV=2	85.894	224.4	157.4	178.7	259.7	322.9	218.9	216.8	300.7	0.207	0	132.06	3	1879.5	1126
Q2TAA5	GDP-Man:Man(3)GlcNAc(2)-PP-Dol alpha-1,2-mannosyltransferase OS=Homo sapiens GN=ALG11 PE=1 SV=2	55.615	227.5	187.7	222.3	235.1	304.8	253.9	198.3	242.1	0.369	0	41.6867	3	1871.7	1127
O60337	E3 ubiquitin-protein ligase MARCH6 OS=Homo sapiens GN=MARCH6 PE=1 SV=2	102.478	189.2	182.5	207	233.9	306.2	274.8	215.2	260.7	0.145	0	50.58	2	1869.5	1128
Q06210	Glutamine--fructose-6-phosphate aminotransferase [isomerizing] 1 OS=Homo sapiens GN=GFPT1 PE=1 SV=3	78.756	192.4	156.7	181.1	251.7	305.7	282.9	238.1	259.4	0.207	0	134.977	4	1868	1129
P82650	28S ribosomal protein S22, mitochondrial OS=Homo sapiens GN=MRPS22 PE=1 SV=1	41.254	254.9	188.9	199.1	247.8	320.5	249.3	186.3	221.2	0.445	0	30.91	4	1868	1130
Q9UHI6	Probable ATP-dependent RNA helicase DDX20 OS=Homo sapiens GN=DDX20 PE=1 SV=2	92.183	197.1	219.4	203.4	330.1	279.7	223	188.7	220.6	0.198	0	60.4167	5	1862	1131
Q969S8	Histone deacetylase 10 OS=Homo sapiens GN=HDAC10 PE=1 SV=1	71.399	210.8	201.9	201.3	292.4	259.3	232.4	198.7	264	0.304	0	100.43	3	1860.8	1132
Q8N2H4	Protein SYS1 homolog OS=Homo sapiens GN=SYS1 PE=1 SV=1	17.603	210.5	236.4	240.3	236.6	259.5	256.8	197.6	223.1	1.683	0	106.753	2	1860.8	1133
Q5TGZ0	MICOS complex subunit MIC10 OS=Homo sapiens GN=MINOS1 PE=1 SV=1	8.802	268.2	205.3	175.8	216	315.9	253.7	190	234.1	2.162	0	76.6133	1	1859	1134
P27348	14-3-3 protein theta OS=Homo sapiens GN=YWHAQ PE=1 SV=1	27.747	203.2	172	220.4	293.8	252	243.7	217	256.6	3.642	0	263.62	9	1858.7	1135
Q9NTJ3	Structural maintenance of chromosomes protein 4 OS=Homo sapiens GN=SMC4 PE=1 SV=2	147.091	216.4	187.3	212.5	277.4	277.4	249	213.9	220.3	0.201	0	131.86	7	1854.2	1136
O43657	Tetraspanin-6 OS=Homo sapiens GN=TSPAN6 PE=1 SV=1	27.545	194.2	217.9	241.5	287.5	249.7	250.3	214.5	193.6	0.585	0	34.33	3	1849.2	1137
Q9H2J7	Sodium-dependent neutral amino acid transporter B(0)AT2 OS=Homo sapiens GN=SLC6A15 PE=1 SV=1	81.783	225.8	216.1	241.2	284.9	243.1	244.2	185.6	204.9	0.484	0	110.37	5	1845.8	1138
A0A087X2I1	26S protease regulatory subunit 10B OS=Homo sapiens GN=PSMC6 PE=1 SV=1	45.768	206.1	177.5	194.6	241	302.9	259	231.5	231.6	0.374	0	80.93	3	1844.2	1139
Q15043	Zinc transporter ZIP14 OS=Homo sapiens GN=SLC39A14 PE=1 SV=3	54.177	248.6	218.5	227.3	279.7	262	234.7	175.6	197.7	1.154	0	91.27	4	1844.1	1140
P61758	Prefoldin subunit 3 OS=Homo sapiens GN=VBP1 PE=1 SV=3	22.643	225.2	179.2	231.8	301.6	258.2	237.7	189.2	221.1	0.848	0	73.2133	4	1844	1141
Q53FV1	ORM1-like protein 2 OS=Homo sapiens GN=ORMDL2 PE=1 SV=2	17.352	243.4	204.8	193.8	229.2	286.4	252.2	205.7	226.1	1.683	1	100.93	2	1841.6	1142
Q99808-2	Isoform 2 of Equilibrative nucleoside transporter 1 OS=Homo sapiens GN=SLC29A1	58.925	208	215.6	225.8	276.7	212.8	227.2	198.2	276.8	0.778	0	131.11	5	1841.1	1143
Q9Y6A1	Protein O-mannosyl-transferase 1 OS=Homo sapiens GN=POMT1 PE=1 SV=3	84.826	191.9	200.7	212.6	227.2	266.1	266.2	214.4	257.6	0.199	0	37.4267	3	1836.7	1144
Q99426	Tubulin-folding cofactor B OS=Homo sapiens GN=TBCB PE=1 SV=2	27.308	215.9	184.4	197.2	251.1	252.1	250.7	197.9	279.1	0.778	0	57.26	4	1828.4	1145
Q9NRW3	DNA dC->dU-editing enzyme APOBEC-3C OS=Homo sapiens GN=APOBEC3C PE=1 SV=2	22.811	229	195.1	188.6	247.1	284.2	257.9	194.4	231.9	0.468	0	29.19	2	1828.2	1146
Q96A57-2	Isoform 1 of Transmembrane protein 230 OS=Homo sapiens GN=TMEM230	19.898	236.1	216	206.9	244.5	261	231.8	205.5	218.8	0.995	0	70.92	3	1820.6	1147
P51809	Vesicle-associated membrane protein 7 OS=Homo sapiens GN=VAMP7 PE=1 SV=3	24.919	199.7	186.5	193	247.6	267.8	258.2	214.9	249.9	0.848	0	153.66	3	1817.6	1148
Q8IWC1	MAP7 domain-containing protein 3 OS=Homo sapiens GN=MAP7D3 PE=1 SV=2	98.368	263.8	185.7	182	245	316.1	247.4	176.1	200.9	0.172	0	134.463	4	1817	1149
Q8IUH4	Palmitoyltransferase ZDHHC13 OS=Homo sapiens GN=ZDHHC13 PE=1 SV=3	70.814	285.8	277.9	243	257	239.4	209.5	142.2	154.9	0.509	1	124.44	4	1809.7	1150
Q8IW92	Beta-galactosidase-1-like protein 2 OS=Homo sapiens GN=GLB1L2 PE=2 SV=1	72.033	204.2	179.9	178.7	235.6	283.2	259.5	206.5	260.6	0.468	0	154.01	5	1808.2	1151
P19388	DNA-directed RNA polymerases I, II, and III subunit RPABC1 OS=Homo sapiens GN=POLR2E PE=1 SV=4	24.536	218.8	168.1	177.9	243.4	312.6	225.7	199.5	259.2	0.425	0	79.57	2	1805.2	1152
Q9UHK0	Nuclear fragile X mental retardation-interacting protein 1 OS=Homo sapiens GN=NUFIP1 PE=1 SV=2	56.264	249.2	165.3	160.9	183.2	370.1	249.8	161.3	262	0.334	0	73.44	2	1801.8	1153
O60499	Syntaxin-10 OS=Homo sapiens GN=STX10 PE=1 SV=1	28.096	213.9	187.1	212.2	239.8	288.9	261.6	193.5	203.4	1.154	0	47.68	5	1800.4	1154
Q8NBN3	Transmembrane protein 87A OS=Homo sapiens GN=TMEM87A PE=1 SV=3	63.389	197	181.1	217.6	259.2	253.1	240.7	202.2	249.3	0.334	0	74.7733	3	1800.2	1155
P10644	cAMP-dependent protein kinase type I-alpha regulatory subunit OS=Homo sapiens GN=PRKAR1A PE=1 SV=1	42.955	231.1	192.6	186.2	219.2	323.5	258.8	181.4	206.2	0.778	0	73.09	5	1799	1156
Q9BW27	Nuclear pore complex protein Nup85 OS=Homo sapiens GN=NUP85 PE=1 SV=1	74.971	260.7	187.9	182.3	231.3	306.5	244.8	184.8	198	0.311	0	78.6	4	1796.3	1157
A2A2Q9	Protein AAR2 homolog OS=Homo sapiens GN=AAR2 PE=1 SV=1	45.005	212.7	171.9	187.8	234.6	301.7	244.4	203.1	233.6	0.389	0	140.66	4	1789.8	1158
O43826-2	Isoform 2 of Glucose-6-phosphate exchanger SLC37A4 OS=Homo sapiens GN=SLC37A4	48.808	206.3	189.5	206.8	262.7	251.6	241	197.3	234.5	0.54	0	61.9833	3	1789.7	1159
O75367	Core histone macro-H2A.1 OS=Homo sapiens GN=H2AFY PE=1 SV=4	39.592	203.2	235.1	142	270.2	222.8	288.3	166.1	252.9	1.069	0	136.37	6	1780.6	1160
Q9NQX7	Integral membrane protein 2C OS=Homo sapiens GN=ITM2C PE=1 SV=1	30.204	159.7	131.2	158	214.4	315	302	222	278.1	1.054	0	133.2	4	1780.4	1161
Q15678	Tyrosine-protein phosphatase non-receptor type 14 OS=Homo sapiens GN=PTPN14 PE=1 SV=2	135.175	247.8	190.4	160.3	193.5	381	273.9	152.8	180	0.155	0	157.164	4	1779.7	1162
Q9UEG4	Zinc finger protein 629 OS=Homo sapiens GN=ZNF629 PE=1 SV=2	96.559	235.5	189.1	161.2	217.7	303.1	261.5	195.6	206.1	0.081	0	51.98	3	1769.8	1163
Q9UI14	Prenylated Rab acceptor protein 1 OS=Homo sapiens GN=RABAC1 PE=1 SV=1	20.635	231	197.7	158.1	213.5	315.5	269.9	183.1	197.8	1.512	0	91.94	2	1766.6	1164
P84090	Enhancer of rudimentary homolog OS=Homo sapiens GN=ERH PE=1 SV=1	12.251	230.8	221.3	158.1	291.6	207	247.4	157.6	250.2	0.931	0	51.66	2	1764	1165
P18085	ADP-ribosylation factor 4 OS=Homo sapiens GN=ARF4 PE=1 SV=3	20.498	174.1	227.2	288.3	300.8	185.4	201.1	189.7	197	1.424	0	104.03	4	1763.6	1166
Q9BQ39	ATP-dependent RNA helicase DDX50 OS=Homo sapiens GN=DDX50 PE=1 SV=1	82.514	254.1	183.7	181.8	195	317.7	246.8	178.7	196.4	0.567	0	214.35	6	1754.2	1167
O00232	26S proteasome non-ATPase regulatory subunit 12 OS=Homo sapiens GN=PSMD12 PE=1 SV=3	52.871	179.9	150.9	198.2	245.8	254.3	233.9	230.7	259.7	0.403	0	76.89	5	1753.4	1168
A0A087WU02	Endoplasmic reticulum-Golgi intermediate compartment protein 2 OS=Homo sapiens GN=ERGIC2 PE=1 SV=1	43.405	215.7	200	211.8	239	251.8	225.8	179.1	225.5	0.65	0	63.5133	4	1748.7	1169
Q99547	M-phase phosphoprotein 6 OS=Homo sapiens GN=MPHOSPH6 PE=1 SV=2	19.012	250.4	156.1	159.8	185.7	342.4	251	175.6	226.2	0.585	0	51.92	2	1747.2	1170
O75569	Interferon-inducible double-stranded RNA-dependent protein kinase activator A OS=Homo sapiens GN=PRKRA PE=1 SV=1	34.383	247.3	176.2	177.5	205.9	324.7	240.8	178	195.5	1.054	0	72.87	5	1745.9	1171
Q04917	14-3-3 protein eta OS=Homo sapiens GN=YWHAH PE=1 SV=4	28.201	184.7	186.9	181.8	239.9	270.4	225.6	198.9	255.5	4.275	0	223.987	10	1743.7	1172
O14734	Acyl-coenzyme A thioesterase 8 OS=Homo sapiens GN=ACOT8 PE=1 SV=1	35.891	254.3	171.4	162.6	193.3	337.3	238.9	168.2	213.6	0.624	0	79.9067	4	1739.6	1173
O75477	Erlin-1 OS=Homo sapiens GN=ERLIN1 PE=1 SV=1	38.901	203.7	196.2	229.1	274.9	203.2	208.9	204	219.6	1.61	0	271.762	8	1739.6	1174
Q6ZRQ5	Protein MMS22-like OS=Homo sapiens GN=MMS22L PE=1 SV=3	142.228	218.2	161.1	152.9	198.6	280.5	234.4	161.9	329.3	0.11	0	29.31	3	1736.9	1175
Q6ZRV2	Protein FAM83H OS=Homo sapiens GN=FAM83H PE=1 SV=3	127.044	222.7	170.6	176.6	215.5	330.7	245.2	174.7	195.4	0.107	0	36.83	3	1731.4	1176
K7ELL7	Glucosidase 2 subunit beta OS=Homo sapiens GN=PRKCSH PE=1 SV=1	60.154	185.4	164.2	200.3	317.8	219.7	224.2	186.2	230.4	1.873	0	183.857	9	1728.2	1177
O60830-2	Isoform 2 of Mitochondrial import inner membrane translocase subunit Tim17-B OS=Homo sapiens GN=TIMM17B	23.808	209.4	163.2	175.9	222.3	282.5	237.6	200.9	232.4	0.638	0	129.61	3	1724.2	1178
Q6L8Q7	2',5'-phosphodiesterase 12 OS=Homo sapiens GN=PDE12 PE=1 SV=2	67.309	246.9	123.2	123	340.2	316.2	154.9	130	286.7	0.407	0	94.32	4	1721.1	1179
Q13356	Peptidyl-prolyl cis-trans isomerase-like 2 OS=Homo sapiens GN=PPIL2 PE=1 SV=1	58.787	223.7	185.2	175.4	226.7	266.5	241.8	177.8	216.8	0.334	0	105.65	4	1713.9	1180
Q01844-5	Isoform 5 of RNA-binding protein EWS OS=Homo sapiens GN=EWSR1	68.923	279.1	186.8	146	195	370.5	225.3	163.8	145.7	0.823	0	126.27	4	1712.2	1181
Q9BVJ6	U3 small nucleolar RNA-associated protein 14 homolog A OS=Homo sapiens GN=UTP14A PE=1 SV=1	87.924	236.2	168.9	190.8	257.1	277.7	228.6	162	185.8	0.103	0	0	2	1707.1	1182
O14776	Transcription elongation regulator 1 OS=Homo sapiens GN=TCERG1 PE=1 SV=2	123.823	226.8	164	172.6	210.4	330.7	233.3	166.1	200.9	0.311	0	83.64	6	1704.8	1183
P63167	Dynein light chain 1, cytoplasmic OS=Homo sapiens GN=DYNLL1 PE=1 SV=1	10.359	193.6	166.2	189	230	268.8	238.2	195	222.3	9	0	303.093	2	1703.1	1184
Q12904-2	Isoform 2 of Aminoacyl tRNA synthase complex-interacting multifunctional protein 1 OS=Homo sapiens GN=AIMP1	37.016	175.6	143.9	208.8	238.6	255.9	229.2	198.2	251.3	0.73	0	216.68	4	1701.5	1185
Q6PML9	Zinc transporter 9 OS=Homo sapiens GN=SLC30A9 PE=1 SV=1	63.475	184.5	183.9	175.4	215	264.5	251.7	203	222.5	0.562	0	107.84	5	1700.5	1186
Q5C9Z4	Nucleolar MIF4G domain-containing protein 1 OS=Homo sapiens GN=NOM1 PE=1 SV=1	96.198	243.1	163.7	140.2	167	382.9	244.4	166.6	189.2	0.224	0	102.6	5	1697.1	1187
Q15051	IQ calmodulin-binding motif-containing protein 1 OS=Homo sapiens GN=IQCB1 PE=1 SV=1	68.886	194	165	183.4	210.7	302.5	234.8	185.9	218.7	0.389	0	148.76	4	1695	1188
O15121	Sphingolipid delta(4)-desaturase DES1 OS=Homo sapiens GN=DEGS1 PE=1 SV=1	37.841	195.7	181.3	187.5	233.7	246.8	230.9	203.1	214.9	0.778	0	144.687	3	1693.9	1189
O43291	Kunitz-type protease inhibitor 2 OS=Homo sapiens GN=SPINT2 PE=1 SV=2	28.21	179	175	182.9	210.9	283.3	238.4	206.9	215	0.701	0	44.03	2	1691.4	1190
Q9Y6N5	Sulfide:quinone oxidoreductase, mitochondrial OS=Homo sapiens GN=SQRDL PE=1 SV=1	49.929	205.8	176.7	182.2	225.6	268.6	222.6	184.6	225.3	0.225	0	39.14	3	1691.4	1191
P43490	Nicotinamide phosphoribosyltransferase OS=Homo sapiens GN=NAMPT PE=1 SV=1	55.487	191.7	161	196.3	241	250.6	224.8	200.1	225.2	0.585	0	97.94	5	1690.7	1192
Q5TDF0	Cancer-related nucleoside-triphosphatase OS=Homo sapiens GN=NTPCR PE=1 SV=1	25.056	197.7	172	181.5	262.9	243.3	217.3	189.2	226.2	0.54	0	66.2733	3	1690.1	1193
P00441	Superoxide dismutase [Cu-Zn] OS=Homo sapiens GN=SOD1 PE=1 SV=2	15.926	212.3	179.3	189.5	236.8	269.4	218.9	190.6	190.6	0.778	0	139.75	3	1687.4	1194
P67775	Serine/threonine-protein phosphatase 2A catalytic subunit alpha isoform OS=Homo sapiens GN=PPP2CA PE=1 SV=1	35.571	206.1	152.5	179.3	239.4	276.3	215.9	179.4	233.2	1.069	0	154.47	5	1682.1	1195
Q9H4A4	Aminopeptidase B OS=Homo sapiens GN=RNPEP PE=1 SV=2	72.549	195.1	153.2	183.5	255.5	225.1	242.3	187.6	238.6	0.468	0	64.48	5	1680.9	1196
E7ERS3	Zinc finger CCCH domain-containing protein 18 OS=Homo sapiens GN=ZC3H18 PE=1 SV=1	108.875	227.7	177.6	161.2	191.5	317.9	233	166.7	203.3	0.28	0	106.33	6	1678.9	1197
O75911	Short-chain dehydrogenase/reductase 3 OS=Homo sapiens GN=DHRS3 PE=1 SV=2	33.527	225.7	177.7	171.7	199.7	292.4	226.8	167.7	208.5	0.334	0	66.29	2	1670.2	1198
Q14008-3	Isoform 3 of Cytoskeleton-associated protein 5 OS=Homo sapiens GN=CKAP5	226.114	191.7	154.9	198.4	242	251.9	211.3	178.2	239.8	0.095	0	70.9	5	1668.2	1199
P0C0S5	Histone H2A.Z OS=Homo sapiens GN=H2AFZ PE=1 SV=2	13.545	224.2	213.5	135.2	284	202.4	245.4	150.6	209.7	5.813	0	155.432	3	1665	1200
Q9NX40	OCIA domain-containing protein 1 OS=Homo sapiens GN=OCIAD1 PE=1 SV=1	27.609	193.1	164.6	179.4	228.6	232.1	244.3	207	214.9	1.61	0	78.78	3	1664	1201
Q7Z7H8-2	Isoform 2 of 39S ribosomal protein L10, mitochondrial OS=Homo sapiens GN=MRPL10	30.288	223.2	159.7	162.7	205.8	312.7	234.4	166.6	198	1.154	0	157.26	4	1663.1	1202
Q9NYF8	Bcl-2-associated transcription factor 1 OS=Homo sapiens GN=BCLAF1 PE=1 SV=2	106.059	214.8	204.6	156.7	239.5	245.7	231	149.9	216.3	0.194	0	48.84	3	1658.5	1203
Q86X55	Histone-arginine methyltransferase CARM1 OS=Homo sapiens GN=CARM1 PE=1 SV=3	65.811	212.5	171.5	185.2	234.2	254.1	221.7	178.7	199.8	0.28	0	20.23	3	1657.7	1204
Q93063-3	Isoform 3 of Exostosin-2 OS=Homo sapiens GN=EXT2	85.759	166.5	202.8	189.1	250	210.9	222.9	184.9	229.5	0.271	0	37.75	5	1656.6	1205
P82663	28S ribosomal protein S25, mitochondrial OS=Homo sapiens GN=MRPS25 PE=1 SV=1	20.103	271.4	162.1	165.2	209.7	307.7	214.3	154.6	171.4	0.52	0	22.58	2	1656.4	1206
Q6Y7W6	PERQ amino acid-rich with GYF domain-containing protein 2 OS=Homo sapiens GN=GIGYF2 PE=1 SV=1	149.978	217.9	168.1	169.9	210	280.9	229	173.4	205.8	0.346	0	98.16	8	1655	1207
Q96BW9-3	Isoform 3 of Phosphatidate cytidylyltransferase, mitochondrial OS=Homo sapiens GN=TAMM41	38.055	222.8	190.7	176.4	207.6	280.2	220.3	171.6	183.9	1.239	0	202.107	7	1653.5	1208
Q8IZV5	Retinol dehydrogenase 10 OS=Homo sapiens GN=RDH10 PE=1 SV=1	38.062	207	172.4	183.1	228.2	272.9	211.4	176	200.2	0.995	0	48.51	5	1651.2	1209
O60684	Importin subunit alpha-7 OS=Homo sapiens GN=KPNA6 PE=1 SV=1	59.991	182.7	158.8	186.8	226.8	264.1	209.5	190.9	230.1	0.638	0	71.38	5	1649.7	1210
O76003	Glutaredoxin-3 OS=Homo sapiens GN=GLRX3 PE=1 SV=2	37.408	192.8	172.5	187.8	245.8	241.7	213.6	185.6	208.4	0.624	0	65.42	3	1648.2	1211
E9PRY8	Elongation factor 1-delta OS=Homo sapiens GN=EEF1D PE=1 SV=1	76.523	171.9	137.9	194.6	251.2	218.8	213.8	210.8	248.6	0.324	0	102.4	4	1647.6	1212
P30049	ATP synthase subunit delta, mitochondrial OS=Homo sapiens GN=ATP5D PE=1 SV=2	17.479	218.3	131	231.7	226.1	233.4	209.2	183.1	205.8	0.778	0	77.07	2	1638.6	1213
P03886	NADH-ubiquinone oxidoreductase chain 1 OS=Homo sapiens GN=MT-ND1 PE=1 SV=1	35.637	267.7	79.4	88.5	292.7	323.9	142.2	98.3	344.9	0.468	0	70.48	1	1637.6	1214
Q86YN1	Dolichyldiphosphatase 1 OS=Homo sapiens GN=DOLPP1 PE=2 SV=1	27.013	176.3	182.3	173.1	221.2	211.1	221.6	184.5	266.2	0.668	0	53.02	1	1636.3	1215
Q9BV10	Dol-P-Man:Man(7)GlcNAc(2)-PP-Dol alpha-1,6-mannosyltransferase OS=Homo sapiens GN=ALG12 PE=1 SV=1	54.619	174.8	154.2	169.8	179.4	241.8	244.6	192.4	277.9	1.228	0	152.67	6	1634.9	1216
O75845	Lathosterol oxidase OS=Homo sapiens GN=SC5D PE=1 SV=2	35.278	185.7	207.5	163.3	195.1	241.2	228.2	177	230.6	0.54	0	18.07	3	1628.6	1217
P32929	Cystathionine gamma-lyase OS=Homo sapiens GN=CTH PE=1 SV=3	44.479	187.4	162.6	163.7	237.5	239.6	219.1	209.3	201.2	0.35	0	72.4167	3	1620.4	1218
O94923	D-glucuronyl C5-epimerase OS=Homo sapiens GN=GLCE PE=1 SV=3	70.057	194.6	186.1	178.6	232.1	213.2	204.5	169.4	235.9	0.482	0	107.973	7	1614.4	1219
Q9ULV4-3	Isoform 3 of Coronin-1C OS=Homo sapiens GN=CORO1C	58.91	180.6	159.3	176.2	246.1	228.6	224.1	182.1	215.5	0.585	0	39.89	6	1612.5	1220
Q9Y241	HIG1 domain family member 1A, mitochondrial OS=Homo sapiens GN=HIGD1A PE=1 SV=1	10.136	236.5	167.9	146.2	172.1	309.6	228.3	150.1	199.4	1.512	0	115.36	1	1610.1	1221
Q9BVK2	Probable dolichyl pyrophosphate Glc1Man9GlcNAc2 alpha-1,3-glucosyltransferase OS=Homo sapiens GN=ALG8 PE=1 SV=2	60.048	181.1	185.5	180.4	226.6	205.8	214.9	183.7	225.8	0.688	1	82.83	4	1603.8	1222
Q9Y3A4	Ribosomal RNA-processing protein 7 homolog A OS=Homo sapiens GN=RRP7A PE=1 SV=2	32.314	209.2	171.8	145.1	196.8	262.4	233.1	165.4	218.5	1.154	0	86.28	4	1602.3	1223
P15529-2	Isoform B of Membrane cofactor protein OS=Homo sapiens GN=CD46	44.209	199.9	178.4	199.6	235	219.8	218.9	160.8	188.2	0.311	0	49.72	2	1600.6	1224
Q13610	Periodic tryptophan protein 1 homolog OS=Homo sapiens GN=PWP1 PE=1 SV=1	55.793	250.4	171.9	116.9	156.3	290.1	234.6	150	228.3	0.468	0	110.44	4	1598.5	1225
U3KQK5	Uncharacterized protein OS=Homo sapiens PE=4 SV=1	17.002	169.5	157.5	154.1	211.8	219.9	229.8	185.1	264.9	0.638	0	68.525	1	1592.6	1226
P68036-3	Isoform 3 of Ubiquitin-conjugating enzyme E2 L3 OS=Homo sapiens GN=UBE2L3	23.989	187.4	161.4	200	252.8	206.7	204	182.7	196.7	0.468	0	36.63	2	1591.7	1227
B3KTQ9	Procollagen-proline, 2-oxoglutarate 4-dioxygenase (Proline 4-hydroxylase), beta polypeptide, isoform CRA_b OS=Homo sapiens GN=P4HB PE=2 SV=1	21.239	182.5	139.3	149.9	206.4	260.6	221.7	181.5	248.1	3.394	0	242.561	6	1590	1228
Q9UN37	Vacuolar protein sorting-associated protein 4A OS=Homo sapiens GN=VPS4A PE=1 SV=1	48.867	211.8	150.8	164.3	226.8	254.9	223.4	172	183.6	0.359	0	38.79	4	1587.6	1229
Q9BQE5	Apolipoprotein L2 OS=Homo sapiens GN=APOL2 PE=1 SV=1	37.069	199.2	166.3	161.4	217.1	282.3	200.4	147.2	201.5	0.292	0	83.77	2	1575.4	1230
Q99575	Ribonucleases P/MRP protein subunit POP1 OS=Homo sapiens GN=POP1 PE=1 SV=2	114.636	221.8	172	133.9	170.9	304.2	236.7	162.8	171.2	0.292	0	188.253	7	1573.5	1231
P35658-5	Isoform 5 of Nuclear pore complex protein Nup214 OS=Homo sapiens GN=NUP214	215.269	220.6	169.1	148.1	175	317	200.5	155.8	185.1	0.28	0	72.5133	9	1571.2	1232
Q8WVP7-3	Isoform 3 of Limb region 1 protein homolog OS=Homo sapiens GN=LMBR1	59.419	196.1	188	170.6	192.6	235.7	205.9	170.1	211.9	0.369	0	34.35	3	1570.9	1233
Q8N4Q1-2	Isoform 2 of Mitochondrial intermembrane space import and assembly protein 40 OS=Homo sapiens GN=CHCHD4	17.374	221.8	173.8	153	195.4	250.8	230.7	168	175	1.783	0	162.69	4	1568.5	1234
O60869	Endothelial differentiation-related factor 1 OS=Homo sapiens GN=EDF1 PE=1 SV=1	16.359	222.7	143	163.2	197.1	292.8	206.9	146.3	194.9	0.778	0	35.31	2	1566.9	1235
Q15181	Inorganic pyrophosphatase OS=Homo sapiens GN=PPA1 PE=1 SV=2	32.639	184.5	144.5	172.1	228.4	227.5	210.6	166.4	225.6	0.995	0	201.493	6	1559.6	1236
Q15029	116 kDa U5 small nuclear ribonucleoprotein component OS=Homo sapiens GN=EFTUD2 PE=1 SV=1	109.366	212.6	150.9	150.9	205.4	254.9	224.1	159.3	189.7	0.477	0	143.104	10	1547.8	1237
O75940	Survival of motor neuron-related-splicing factor 30 OS=Homo sapiens GN=SMNDC1 PE=1 SV=1	26.694	192.3	160.1	165.1	230.9	225.5	215	165.6	190.1	0.52	0	87.3667	2	1544.6	1238
P06454	Prothymosin alpha OS=Homo sapiens GN=PTMA PE=1 SV=2	12.196	103.8	103.3	212.4	392.6	164.9	211.1	166.2	190.2	9	0	103.58	3	1544.5	1239
H0YI09	Methyltransferase-like protein 7A (Fragment) OS=Homo sapiens GN=METTL7A PE=1 SV=1	28.28	204.7	162.7	155.5	160.3	311.4	216.3	149.9	182.7	1.61	0	104.7	4	1543.5	1240
O95159	Zinc finger protein-like 1 OS=Homo sapiens GN=ZFPL1 PE=1 SV=2	34.092	194	170.6	172	199.6	248.3	212	147.9	195.1	0.425	0	57.02	2	1539.5	1241
P41091	Eukaryotic translation initiation factor 2 subunit 3 OS=Homo sapiens GN=EIF2S3 PE=1 SV=3	51.077	162	132.3	177.3	220	235.7	215.7	166.6	229.6	0.212	0	16.14	2	1539.2	1242
Q8IUF1	COBW domain-containing protein 2 OS=Homo sapiens GN=CBWD2 PE=2 SV=1	44.007	201	171	154.5	199.6	236.9	218.1	157.2	199	0.35	0	63.5	3	1537.3	1243
Q15011	Homocysteine-responsive endoplasmic reticulum-resident ubiquitin-like domain member 1 protein OS=Homo sapiens GN=HERPUD1 PE=1 SV=1	43.693	164	152.4	147.8	172.9	226.8	228.4	172.4	272.5	1.276	0	67.01	4	1537.2	1244
P52429	Diacylglycerol kinase epsilon OS=Homo sapiens GN=DGKE PE=1 SV=1	63.885	190.2	152.9	175.6	219.6	226.8	206	170.2	191.6	0.778	0	215.81	7	1532.9	1245
Q92604	Acyl-CoA:lysophosphatidylglycerol acyltransferase 1 OS=Homo sapiens GN=LPGAT1 PE=1 SV=1	43.061	206.8	155.2	140.2	172	280	221.5	152.7	202.7	0.585	0	60.13	4	1531.1	1246
Q9BY32	Inosine triphosphate pyrophosphatase OS=Homo sapiens GN=ITPA PE=1 SV=2	21.432	157.4	138.8	171.9	223.9	219.7	201.6	187.1	230.2	1.154	0	143.66	4	1530.6	1247
P40937	Replication factor C subunit 5 OS=Homo sapiens GN=RFC5 PE=1 SV=1	38.472	199.3	143.9	160.5	209.6	232.9	216.6	167	199.7	0.487	0	97.1837	5	1529.5	1248
Q9Y5V3-2	Isoform 2 of Melanoma-associated antigen D1 OS=Homo sapiens GN=MAGED1	91.901	197.7	144.2	138	155	346.4	241.9	152.1	149.2	0.205	0	75.3533	3	1524.5	1249
Q5F1R6-2	Isoform 2 of DnaJ homolog subfamily C member 21 OS=Homo sapiens GN=DNAJC21	67.099	217.6	154.5	143	166.9	433.9	185.6	97.4	123.9	0.145	0	23.64	2	1522.8	1250
Q9P0S9	Transmembrane protein 14C OS=Homo sapiens GN=TMEM14C PE=1 SV=1	11.557	169.7	163.6	151	195.7	223.8	234.9	161.9	221.9	3.642	0	292.49	2	1522.5	1251
Q9BSF4	Uncharacterized protein C19orf52 OS=Homo sapiens GN=C19orf52 PE=1 SV=2	29.215	178.1	161.9	167.6	210.4	244.8	202.5	150.7	200.7	0.359	0	46.22	2	1516.7	1252
E7EMK3	Flotillin-2 OS=Homo sapiens GN=FLOT2 PE=1 SV=1	53.104	163.3	150.4	178.2	235.7	195.3	219.5	169.2	204.3	0.301	0	70.63	4	1515.9	1253
Q5BJH7	Protein YIF1B OS=Homo sapiens GN=YIF1B PE=1 SV=1	34.413	163.2	167	173.7	209.6	235.4	209.3	180.5	176.6	2.831	1	204.505	5	1515.3	1254
Q6P4A7	Sideroflexin-4 OS=Homo sapiens GN=SFXN4 PE=1 SV=1	37.974	200.4	160.4	158.9	192.7	257.2	213.9	159.8	170.5	0.389	1	72.5067	3	1513.8	1255
Q9Y2Z0	Protein SGT1 homolog OS=Homo sapiens GN=SUGT1 PE=1 SV=3	40.998	157.7	147.8	174.1	240.7	214.9	196.4	175.5	203.9	0.616	0	60.55	5	1511	1256
A0A087WWK8	IQ motif and SEC7 domain-containing protein 1 OS=Homo sapiens GN=IQSEC1 PE=1 SV=1	124.399	176.2	142.5	171	203.6	273.3	200.7	168	172.1	0.208	0	92.8467	4	1507.4	1257
Q9BYG3	MKI67 FHA domain-interacting nucleolar phosphoprotein OS=Homo sapiens GN=NIFK PE=1 SV=1	34.201	202.6	170.6	128.5	186.7	261.7	223.5	137.9	193.5	0.311	0	120.41	2	1505	1258
Q7L8L6	FAST kinase domain-containing protein 5, mitochondrial OS=Homo sapiens GN=FASTKD5 PE=1 SV=1	86.519	173.1	145.4	160.9	215.1	235.6	205.1	161.5	206.9	0.227	0	68	4	1503.6	1259
O00258	Tail-anchored protein insertion receptor WRB OS=Homo sapiens GN=WRB PE=1 SV=2	19.767	181.8	164.9	151.1	200.5	234.9	204.7	152.7	211.2	0.468	0	42.58	2	1501.8	1260
Q9BXW9-1	Isoform 1 of Fanconi anemia group D2 protein OS=Homo sapiens GN=FANCD2	166.356	229.8	155.1	153.4	175	297.1	189.1	140.7	155.6	0.153	0	67.76	5	1495.8	1261
H0YKJ9	Tetraspanin-3 OS=Homo sapiens GN=TSPAN3 PE=1 SV=1	18.337	149.3	154	160.6	209.3	227.9	197.2	176.7	220.6	0.668	0	52.59	2	1495.6	1262
E9PRZ1	Protein SAAL1 OS=Homo sapiens GN=SAAL1 PE=1 SV=1	53.772	198.5	164	164.8	207.4	240.3	200.5	151.4	168.3	0.292	0	45.63	3	1495.2	1263
Q99661	Kinesin-like protein KIF2C OS=Homo sapiens GN=KIF2C PE=1 SV=2	81.261	165.9	161.2	171.1	222.6	206.9	207.8	163.9	191.6	0.456	0	141.687	7	1491	1264
Q9Y6H1	Coiled-coil-helix-coiled-coil-helix domain-containing protein 2 OS=Homo sapiens GN=CHCHD2 PE=1 SV=1	15.503	192.4	163.1	165.7	182.6	198	250.1	172.4	157	1.512	0	60.07	1	1481.3	1265
Q6UWP7	Lysocardiolipin acyltransferase 1 OS=Homo sapiens GN=LCLAT1 PE=1 SV=1	48.888	172.5	155.5	151.6	210.2	221.3	207.5	167.6	194.5	0.823	0	123.83	5	1480.7	1266
Q5T3I0-3	Isoform 3 of G patch domain-containing protein 4 OS=Homo sapiens GN=GPATCH4	50.897	253.8	179.5	118.5	132.2	321.8	200.2	129.9	140.4	0.711	0	167.02	7	1476.3	1267
Q5SSJ5	Heterochromatin protein 1-binding protein 3 OS=Homo sapiens GN=HP1BP3 PE=1 SV=1	61.169	213.4	149.2	120.6	171	268.1	221.5	149.2	182.3	0.63	0	91.56	7	1475.3	1268
Q86X52	Chondroitin sulfate synthase 1 OS=Homo sapiens GN=CHSY1 PE=1 SV=3	91.726	171.7	145.9	146.7	181.3	229.4	213.6	159.9	223.5	0.086	0	36.24	2	1472	1269
Q8NC54	Keratinocyte-associated transmembrane protein 2 OS=Homo sapiens GN=KCT2 PE=1 SV=2	29.217	196.9	160	159.1	183.1	249.2	202.6	149.7	167.8	0.179	0	0	1	1468.4	1270
Q9Y230	RuvB-like 2 OS=Homo sapiens GN=RUVBL2 PE=1 SV=3	51.125	172.8	140.8	172.9	197.9	250.9	192.1	173	167.2	0.61	0	125.52	6	1467.6	1271
Q9UKA4	A-kinase anchor protein 11 OS=Homo sapiens GN=AKAP11 PE=1 SV=1	210.38	178	149.9	142.7	161.9	298.3	207.9	148.8	179.7	0.125	0	119.57	5	1467.2	1272
P21266	Glutathione S-transferase Mu 3 OS=Homo sapiens GN=GSTM3 PE=1 SV=3	26.542	170.4	146.3	189.2	220.2	195	191.6	155.4	192.5	0.833	0	71.78	5	1460.6	1273
P37287	Phosphatidylinositol N-acetylglucosaminyltransferase subunit A OS=Homo sapiens GN=PIGA PE=1 SV=1	54.092	152	149.1	159.8	183.3	205.6	215	174.4	220.9	0.259	0	39.22	3	1460.1	1274
Q5BKT4	Dol-P-Glc:Glc(2)Man(9)GlcNAc(2)-PP-Dol alpha-1,2-glucosyltransferase OS=Homo sapiens GN=ALG10 PE=2 SV=1	55.569	166.6	153.4	158	190.8	215.5	209.2	155.3	210.7	0.52	0	72.65	4	1459.5	1275
P67812-3	Isoform 3 of Signal peptidase complex catalytic subunit SEC11A OS=Homo sapiens GN=SEC11A	21.44	157.7	177.6	166.3	227.8	180.6	192	160.9	194.5	1.031	0	61.4533	3	1457.4	1276
Q8IY37	Probable ATP-dependent RNA helicase DHX37 OS=Homo sapiens GN=DHX37 PE=1 SV=1	129.464	208.6	153.1	132.2	157.4	270.4	214.8	145.6	175	0.147	0	122.52	4	1457.1	1277
Q5JRX3-2	Isoform 2 of Presequence protease, mitochondrial OS=Homo sapiens GN=PITRM1	117.437	171.5	133.4	162.6	234.9	209.6	184.2	171	188	0.237	0	106.43	6	1455.2	1278
Q8IZP0	Abl interactor 1 OS=Homo sapiens GN=ABI1 PE=1 SV=4	55.047	162.8	139.4	151.5	217.7	202.4	193.8	169.7	216	0.73	0	129.3	5	1453.3	1279
Q8NB90	Spermatogenesis-associated protein 5 OS=Homo sapiens GN=SPATA5 PE=1 SV=3	97.843	185.1	142.6	146.6	212.4	249.8	192.5	157.2	160.3	0.274	0	110.143	5	1446.5	1280
H0Y8C3	Mitochondrial carrier homolog 1 (Fragment) OS=Homo sapiens GN=MTCH1 PE=1 SV=1	43.093	141.9	125.2	139.7	175.5	209.4	219.6	154.7	275.8	0.116	0	43.48	1	1441.8	1281
P12268	Inosine-5'-monophosphate dehydrogenase 2 OS=Homo sapiens GN=IMPDH2 PE=1 SV=2	55.77	152.7	123.3	170.2	220.4	204.3	192.2	172.3	203	0.532	0	154.47	4	1438.4	1282
B3KM47	cDNA FLJ10273 fis, clone HEMBB1001137, highly similar to SEC23-interacting protein OS=Homo sapiens PE=2 SV=1	111.046	160	148.5	168.4	192.6	206.6	207.2	172.4	181.1	0.216	0	91.9577	4	1436.8	1283
Q96JJ7	Protein disulfide-isomerase TMX3 OS=Homo sapiens GN=TMX3 PE=1 SV=2	51.839	187.8	151.3	154.2	170	237.7	204.7	146	183.8	0.701	0	70.23	5	1435.5	1284
O95456	Proteasome assembly chaperone 1 OS=Homo sapiens GN=PSMG1 PE=1 SV=1	32.833	171.5	154	148	213.2	226.9	195.1	142.8	178.4	0.311	0	17.11	2	1429.9	1285
O43181	NADH dehydrogenase [ubiquinone] iron-sulfur protein 4, mitochondrial OS=Homo sapiens GN=NDUFS4 PE=1 SV=1	20.095	157.3	127	146.8	185.8	197	232.5	173.8	205.4	0.874	0	111.86	2	1425.6	1286
Q99538	Legumain OS=Homo sapiens GN=LGMN PE=1 SV=1	49.379	237.9	149.9	146.3	141.8	281.1	196.9	128.9	138.1	0.334	0	124.24	2	1420.9	1287
Q8IX90	Spindle and kinetochore-associated protein 3 OS=Homo sapiens GN=SKA3 PE=1 SV=2	46.33	160.4	145.7	146.6	180.6	261	195.9	160.5	161.5	0.202	0	13.61	2	1412.2	1288
P25789	Proteasome subunit alpha type-4 OS=Homo sapiens GN=PSMA4 PE=1 SV=1	29.465	175.4	145.4	156.7	180	243.2	186.3	148.6	171.3	0.359	0	90.5	2	1406.9	1289
A0A140T9T7	Antigen peptide transporter 1 OS=Homo sapiens GN=TAP1 PE=1 SV=1	87.121	176.3	147.6	155.4	199.6	199.7	204.8	142.7	179.6	0.528	0	133.877	5	1405.7	1290
Q5JVF3-4	Isoform 4 of PCI domain-containing protein 2 OS=Homo sapiens GN=PCID2	52.066	179.7	130.1	150	186.8	243.9	202.5	145.7	164	0.218	0	48.3633	2	1402.7	1291
Q96SZ6	CDK5 regulatory subunit-associated protein 1 OS=Homo sapiens GN=CDK5RAP1 PE=1 SV=2	67.646	195.1	151	149.7	184.5	236.6	187.2	132.9	165.4	0.189	0	81.69	3	1402.4	1292
Q96HV5	Transmembrane protein 41A OS=Homo sapiens GN=TMEM41A PE=1 SV=1	29.646	158	158.6	163.2	187.9	200.2	194.9	163.4	169.8	0.52	0	0	2	1396	1293
P36551	Oxygen-dependent coproporphyrinogen-III oxidase, mitochondrial OS=Homo sapiens GN=CPOX PE=1 SV=3	50.12	169.4	147.5	142.9	205.9	212.3	185.8	133.7	194.2	0.468	0	47.1167	5	1391.7	1294
Q9UMS0	NFU1 iron-sulfur cluster scaffold homolog, mitochondrial OS=Homo sapiens GN=NFU1 PE=1 SV=2	28.444	160.7	139.7	158.8	230.1	194.8	163.9	152	190.8	0.389	0	31.44	2	1390.8	1295
O43852-4	Isoform 4 of Calumenin OS=Homo sapiens GN=CALU	38.055	97.4	114.5	139.9	193.4	151.2	203.6	203.2	286	4.275	0	237.083	10	1389.2	1296
Q15417	Calponin-3 OS=Homo sapiens GN=CNN3 PE=1 SV=1	36.391	142.7	125.4	168	231.8	221.1	172.7	155.7	166.3	1.336	0	127.019	7	1383.7	1297
Q9UDW1	Cytochrome b-c1 complex subunit 9 OS=Homo sapiens GN=UQCR10 PE=1 SV=3	7.304	154.8	130.5	127.3	158.2	211	216.7	171.6	212.7	9	0	155.28	3	1382.8	1298
F2Z2W7	tRNA (uracil-5-)-methyltransferase homolog A OS=Homo sapiens GN=TRMT2A PE=1 SV=1	70.79	199.7	156.8	137.6	157.9	269.7	188.6	127.8	139.8	0.425	0	43.5	6	1377.9	1299
Q9Y6M9	NADH dehydrogenase [ubiquinone] 1 beta subcomplex subunit 9 OS=Homo sapiens GN=NDUFB9 PE=1 SV=3	21.817	156	136.3	129.5	181.2	166.7	234.2	176.6	196.2	1.512	0	118.08	3	1376.7	1300
L7N2F9	Uncharacterized protein (Fragment) OS=Homo sapiens PE=4 SV=1	13.06	138.7	157.8	179.5	221.3	158	180.4	156.5	182.9	5.31	1	232.1	3	1375.1	1301
Q9BXS5-2	Isoform 2 of AP-1 complex subunit mu-1 OS=Homo sapiens GN=AP1M1	49.809	170.2	143.6	157.5	187.8	220.3	190.6	143	157.7	0.359	0	37.06	4	1370.7	1302
Q9BTT6	Leucine-rich repeat-containing protein 1 OS=Homo sapiens GN=LRRC1 PE=1 SV=1	59.205	165.7	140.4	144.8	183.2	209.6	197.4	155.2	172.3	0.16	0	48.72	2	1368.6	1303
Q9Y3B4	Splicing factor 3B subunit 6 OS=Homo sapiens GN=SF3B6 PE=1 SV=1	14.576	169.3	132.6	133.6	183.2	212.2	211.9	148.8	176.1	0.778	0	38.8	1	1367.7	1304
Q9UKM7	Endoplasmic reticulum mannosyl-oligosaccharide 1,2-alpha-mannosidase OS=Homo sapiens GN=MAN1B1 PE=1 SV=2	79.53	154.3	144.6	143.4	181.2	228.9	201.8	147.5	165.5	0.189	0	39.42	3	1367.2	1305
Q9HC36	rRNA methyltransferase 3, mitochondrial OS=Homo sapiens GN=MRM3 PE=1 SV=2	46.99	191.5	135.9	139.7	160.5	231.3	200.1	148.7	158.4	0.202	0	14.38	2	1366.1	1306
B1AKJ5	Nardilysin OS=Homo sapiens GN=NRDC PE=1 SV=1	139.325	170.3	139.4	161.6	205.5	195	172.8	143.1	176.2	0.179	0	40.75	4	1363.9	1307
Q9H1A3	Methyltransferase-like protein 9 OS=Homo sapiens GN=METTL9 PE=2 SV=1	36.513	185.6	137.9	141.7	162.8	226.7	199.2	145.9	163.2	0.468	0	48.42	3	1363	1308
P50213	Isocitrate dehydrogenase [NAD] subunit alpha, mitochondrial OS=Homo sapiens GN=IDH3A PE=1 SV=1	39.566	176.2	133.4	146.7	185.4	218.4	191.7	139.4	170.4	1.154	0	70.64	6	1361.6	1309
F8VVA7	Coatomer subunit zeta-1 OS=Homo sapiens GN=COPZ1 PE=1 SV=1	22.326	137.4	130.6	170	164.7	197.7	194.7	182.1	183.8	0.668	0	82.45	2	1361	1310
P61981	14-3-3 protein gamma OS=Homo sapiens GN=YWHAG PE=1 SV=2	28.285	159.6	128.3	174	210.4	206.5	175.3	138.1	159	3.642	0	141.486	8	1351.2	1311
Q16775	Hydroxyacylglutathione hydrolase, mitochondrial OS=Homo sapiens GN=HAGH PE=1 SV=2	33.784	152.6	130	154.1	186.7	195.1	163.6	159.3	209.6	0.624	0	56.39	4	1351	1312
P60953	Cell division control protein 42 homolog OS=Homo sapiens GN=CDC42 PE=1 SV=2	21.245	173.9	147.4	128.7	167.2	231.2	205.3	129.6	167.4	0.995	0	83.1633	3	1350.7	1313
Q9C0D9	Ethanolaminephosphotransferase 1 OS=Homo sapiens GN=EPT1 PE=1 SV=3	45.2	140.8	147.7	149.3	173	179.7	188.8	158.2	213.1	0.874	0	121.6	2	1350.6	1314
Q9NR46-2	Isoform 2 of Endophilin-B2 OS=Homo sapiens GN=SH3GLB2	44.738	156.6	134.7	153	179.6	210.6	185.7	150.1	177.8	0.101	0	36.07	1	1348.1	1315
Q9H1C7	Cysteine-rich and transmembrane domain-containing protein 1 OS=Homo sapiens GN=CYSTM1 PE=1 SV=1	10.624	190.1	178.5	164.3	186.9	199.3	164	120.4	143.9	2.162	0	55.18	1	1347.4	1316
A0A0B4J1Y9	Protein IGHV3-72 (Fragment) OS=Homo sapiens GN=IGHV3-72 PE=1 SV=1	13.194	149.1	123.6	141.1	204.3	197	181.1	155.1	195.2	2.162	0	92.8082	1	1346.5	1317
H3BMF4	Protein spinster homolog 1 OS=Homo sapiens GN=SPNS1 PE=1 SV=1	61.067	161.4	156.7	132	175.1	221.3	192.9	135	171.4	0.318	0	75.0467	2	1345.8	1318
O15269	Serine palmitoyltransferase 1 OS=Homo sapiens GN=SPTLC1 PE=1 SV=1	52.71	161.5	143.6	144	168.7	215.8	191.1	153.2	165.2	0.743	0	89.08	6	1343.1	1319
P60059	Protein transport protein Sec61 subunit gamma OS=Homo sapiens GN=SEC61G PE=1 SV=1	7.736	154.7	150.8	146.9	184.9	204.5	170.7	145.5	173.1	2.162	0	133.99	2	1331.1	1320
Q9Y3Q3	Transmembrane emp24 domain-containing protein 3 OS=Homo sapiens GN=TMED3 PE=1 SV=1	24.761	222.4	212	221.2	227.9	127.5	120	85.5	111.5	0.425	0	36.5767	2	1328	1321
Q9UBV7	Beta-1,4-galactosyltransferase 7 OS=Homo sapiens GN=B4GALT7 PE=1 SV=1	37.382	153.7	148.2	147.3	178.9	190.8	186.2	154.2	167.8	0.292	0	21.94	2	1327.1	1322
Q9BRB3-2	Isoform 2 of Phosphatidylinositol N-acetylglucosaminyltransferase subunit Q OS=Homo sapiens GN=PIGQ	65.302	127.9	144.9	138.2	185.9	178.8	188.3	167.5	195.4	0.334	0	104.35	4	1326.9	1323
Q13813	Spectrin alpha chain, non-erythrocytic 1 OS=Homo sapiens GN=SPTAN1 PE=1 SV=3	284.364	149.4	118.7	131.9	188	187.2	188.9	161	200.6	0.05	0	35.58	4	1325.7	1324
Q13541	Eukaryotic translation initiation factor 4E-binding protein 1 OS=Homo sapiens GN=EIF4EBP1 PE=1 SV=3	12.572	160.9	129.4	142.3	194.6	215.2	180.9	139.9	159.9	1.371	0	112.657	2	1323.1	1325
P13498	Cytochrome b-245 light chain OS=Homo sapiens GN=CYBA PE=1 SV=3	20.999	185.6	160.3	147.8	140.3	213.7	188.6	136.1	146	0.585	0	31.1	2	1318.4	1326
Q7L5D6	Golgi to ER traffic protein 4 homolog OS=Homo sapiens GN=GET4 PE=1 SV=1	36.481	160.1	125.4	131.1	164.4	213.6	183.3	150.6	186.9	0.136	0	45.83	1	1315.4	1327
Q6YN16	Hydroxysteroid dehydrogenase-like protein 2 OS=Homo sapiens GN=HSDL2 PE=1 SV=1	45.366	167.8	130.4	130.4	165.2	203	179.8	148.7	186.3	0.179	0	65.45	2	1311.6	1328
B3KME2	cDNA FLJ10772 fis, clone NT2RP4000243, highly similar to Cartilage-associated protein OS=Homo sapiens PE=2 SV=1	46.474	145	127.6	142.8	199.9	208.1	179.1	153.3	154.9	0.186	0	59.48	2	1310.7	1329
X5CMH5	Antigen peptide transporter 2 OS=Homo sapiens GN=TAP2 PE=1 SV=1	77.646	160.5	136.3	145.7	164.4	228	182.6	133.6	159.2	0.403	0	80.66	4	1310.3	1330
Q9NQ29	Putative RNA-binding protein Luc7-like 1 OS=Homo sapiens GN=LUC7L PE=1 SV=1	43.701	178.8	132.1	128.6	184.1	220.1	177.3	127.1	156.7	1.239	0	139.49	6	1304.8	1331
Q15800	Methylsterol monooxygenase 1 OS=Homo sapiens GN=MSMO1 PE=1 SV=1	35.193	150.3	141.3	138.1	160.1	215.5	186.8	159.3	147.5	0.585	0	57.52	2	1298.9	1332
P81605-2	Isoform 2 of Dermcidin OS=Homo sapiens GN=DCD	12.406	160.8	79.5	89.3	181.3	137.8	222.3	222	205.5	0.778	0	72.63	2	1298.5	1333
Q658P3-2	Isoform 2 of Metalloreductase STEAP3 OS=Homo sapiens GN=STEAP3	55.616	162.9	155.3	148.4	184.7	190.5	164.6	133.2	156.8	0.179	0	60.5	2	1296.4	1334
Q99959-2	Isoform 1 of Plakophilin-2 OS=Homo sapiens GN=PKP2	92.699	192.9	138.6	110.8	160	280.5	180.4	112.5	119.7	0.28	0	158.654	7	1295.4	1335
Q96PU5-2	Isoform 2 of E3 ubiquitin-protein ligase NEDD4-like OS=Homo sapiens GN=NEDD4L	104.856	140.4	130.3	153.1	189.8	188.2	163.1	146.4	183.7	0.19	0	104.29	4	1295	1336
O96007	Molybdopterin synthase catalytic subunit OS=Homo sapiens GN=MOCS2 PE=1 SV=1	20.931	156.1	126.6	125.3	181.7	196.7	199.7	154.5	153.5	0.194	0	0	1	1294.1	1337
P48729	Casein kinase I isoform alpha OS=Homo sapiens GN=CSNK1A1 PE=1 SV=2	38.89	148.2	124.4	126.7	155.6	249.6	180	129.8	179.6	0.73	0	77.19	5	1293.9	1338
P14923	Junction plakoglobin OS=Homo sapiens GN=JUP PE=1 SV=3	81.693	137.4	137	147.5	204.2	180.3	183.7	146.2	157.4	0.233	0	81.4733	4	1293.7	1339
I3L504	Eukaryotic translation initiation factor 5A-1 OS=Homo sapiens GN=EIF5A PE=1 SV=1	20.49	153	131.6	159.5	221.4	160.9	164.6	129.9	169.9	0.668	0	47.31	2	1290.8	1340
Q9H6U8-3	Isoform 3 of Alpha-1,2-mannosyltransferase ALG9 OS=Homo sapiens GN=ALG9	70.74	169.2	146.4	133.5	167.8	196.4	172.7	137.8	161.9	0.28	0	49.0333	3	1285.7	1341
Q9UIQ6	Leucyl-cystinyl aminopeptidase OS=Homo sapiens GN=LNPEP PE=1 SV=3	117.274	141.6	130.8	146.9	185.9	194.6	179.9	138.2	166.6	0.129	0	110.687	3	1284.5	1342
Q6S8J3	POTE ankyrin domain family member E OS=Homo sapiens GN=POTEE PE=1 SV=3	121.286	188.7	136.5	154.9	162	220.8	179.6	114.1	127.6	0.272	0	350.854	6	1284.2	1343
J3KQY1	39S ribosomal protein L22, mitochondrial OS=Homo sapiens GN=MRPL22 PE=1 SV=1	26.458	158.6	133.3	131.6	154.7	228.4	180.6	142.2	153.2	0.501	0	47.0533	3	1282.6	1344
A0A0A0MTC5	Double-stranded RNA-binding protein Staufen homolog 2 OS=Homo sapiens GN=STAU2 PE=1 SV=1	62.569	172.5	126	126.4	145	240.6	174.1	135.5	159.6	0.604	0	139.065	7	1279.7	1345
Q12846	Syntaxin-4 OS=Homo sapiens GN=STX4 PE=1 SV=2	34.159	137.9	143.3	158.1	182.2	147.4	166.3	155.4	187.1	0.274	0	64.58	2	1277.7	1346
P00338-3	Isoform 3 of L-lactate dehydrogenase A chain OS=Homo sapiens GN=LDHA	39.812	118.9	111	145.3	211.2	189.5	187.1	142.4	170.1	0.778	0	178.747	5	1275.5	1347
Q3ZAQ7	Vacuolar ATPase assembly integral membrane protein VMA21 OS=Homo sapiens GN=VMA21 PE=1 SV=1	11.347	134.9	134	138.9	170.1	162.5	190.2	153.5	190.3	1.154	0	42.72	1	1274.4	1348
Q9Y2S7	Polymerase delta-interacting protein 2 OS=Homo sapiens GN=POLDIP2 PE=1 SV=1	42.007	156.4	127.5	136.2	169.5	221.5	174	131.1	157.6	0.089	0	22.42	1	1273.8	1349
O95478	Ribosome biogenesis protein NSA2 homolog OS=Homo sapiens GN=NSA2 PE=1 SV=1	30.047	193.1	126.5	111.5	153.4	249	163.8	118.4	149.9	0.425	0	65.6	2	1265.6	1350
Q9Y305-4	Isoform 4 of Acyl-coenzyme A thioesterase 9, mitochondrial OS=Homo sapiens GN=ACOT9	50.818	156.7	127.5	134.1	150.7	232	185.6	125.6	153	0.172	0	40.21	2	1265.2	1351
Q9Y2H6	Fibronectin type-III domain-containing protein 3A OS=Homo sapiens GN=FNDC3A PE=1 SV=4	131.767	141.5	130.2	133.8	160.4	197.6	181.1	140.8	178.9	0.215	0	87.7433	5	1264.3	1352
Q1KMD3	Heterogeneous nuclear ribonucleoprotein U-like protein 2 OS=Homo sapiens GN=HNRNPUL2 PE=1 SV=1	85.052	159.3	124.7	128.9	163.5	213.4	173.7	133.7	166.1	0.245	0	104.98	3	1263.3	1353
O43731	ER lumen protein-retaining receptor 3 OS=Homo sapiens GN=KDELR3 PE=2 SV=1	25.01	110.7	129.6	118.3	145.4	187.5	208	171.9	191.7	1.783	0	93.99	3	1263.1	1354
Q96IK0	Transmembrane protein 101 OS=Homo sapiens GN=TMEM101 PE=1 SV=1	28.776	166.8	128.3	136.9	134.2	229.5	198.3	123.4	143.9	0.334	0	35.44	1	1261.3	1355
Q9BVA1	Tubulin beta-2B chain OS=Homo sapiens GN=TUBB2B PE=1 SV=1	49.921	189.5	129.2	106.8	120.1	320.3	181	105.9	107.8	2014.34	0	7827.52	21	1260.6	1356
B3KN29	cDNA FLJ13371 fis, clone PLACE1000656, highly similar to PRA1 family protein 2 OS=Homo sapiens PE=2 SV=1	19.277	133.2	133.6	130.4	169.2	198.9	193.1	126.1	176.1	9	0	152.127	4	1260.6	1357
Q9Y6K0	Choline/ethanolaminephosphotransferase 1 OS=Homo sapiens GN=CEPT1 PE=1 SV=1	46.523	138.6	135.3	140.3	174.6	195.1	173.3	136	164.4	1.894	0	139.775	4	1257.6	1358
P46734-3	Isoform 2 of Dual specificity mitogen-activated protein kinase kinase 3 OS=Homo sapiens GN=MAP2K3	39.914	143	130.8	139.8	192.6	173.2	173.6	138	165	0.318	0	35.59	3	1256	1359
B3KS36	cDNA FLJ35376 fis, clone SKMUS2004044, highly similar to Homo sapiens ribosomal protein L3 (RPL3), transcript variant 2, mRNA OS=Homo sapiens PE=2 SV=1	40.12	178.7	147.7	99	125.3	252.7	178.5	124.5	144.4	277.256	0	1512.67	20	1250.8	1360
Q9H0V1	Transmembrane protein 168 OS=Homo sapiens GN=TMEM168 PE=2 SV=2	79.702	152.4	153.6	155.2	182.3	169.2	154.9	128.3	153.6	0.225	0	51.1433	3	1249.5	1361
Q12948	Forkhead box protein C1 OS=Homo sapiens GN=FOXC1 PE=1 SV=3	56.753	166.3	135.8	148	170.4	208.4	169.3	129.3	117.2	0.778	0	68.33	4	1244.7	1362
Q15477	Helicase SKI2W OS=Homo sapiens GN=SKIV2L PE=1 SV=3	137.668	140.9	120.1	131.3	175.7	215.2	168.3	128.8	164.3	0.222	0	98.21	5	1244.6	1363
A0A0C4DGQ5	Calpain small subunit 1 OS=Homo sapiens GN=CAPNS1 PE=1 SV=1	33.765	132.6	110.6	146.6	166	186.1	166.5	138.8	196.4	0.968	0	104.39	5	1243.6	1364
P20645	Cation-dependent mannose-6-phosphate receptor OS=Homo sapiens GN=M6PR PE=1 SV=1	30.973	140.1	127.8	134.5	190.7	181.3	171.6	129.2	166.5	0.896	0	78.85	5	1241.7	1365
Q9BW92	Threonine--tRNA ligase, mitochondrial OS=Homo sapiens GN=TARS2 PE=1 SV=1	80.985	153.3	123.5	147.8	169.3	211.7	162.2	139.7	133.5	0.222	0	102.74	4	1241	1366
P49748-3	Isoform 3 of Very long-chain specific acyl-CoA dehydrogenase, mitochondrial OS=Homo sapiens GN=ACADVL	72.881	148.5	134.3	145.2	199	167.1	151.6	133.8	161.4	0.166	0	70.42	3	1240.9	1367
Q15120-2	Isoform 2 of [Pyruvate dehydrogenase (acetyl-transferring)] kinase isozyme 3, mitochondrial OS=Homo sapiens GN=PDK3	48.013	140.1	132.1	139.5	171.2	196.5	161.1	133.7	166.2	0.304	0	94.9167	3	1240.4	1368
Q6UW56-3	Isoform 3 of All-trans retinoic acid-induced differentiation factor OS=Homo sapiens GN=ATRAID	30.322	161.3	136.3	137	165	181.4	157.4	147.7	153.2	0.359	0	35.69	2	1239.3	1369
Q5SRE5	Nucleoporin NUP188 homolog OS=Homo sapiens GN=NUP188 PE=1 SV=1	195.917	160.3	125.9	137.6	180.9	201.6	153.4	124.7	149	0.168	0	72	6	1233.4	1370
Q8N6L1-2	Isoform 2 of Keratinocyte-associated protein 2 OS=Homo sapiens GN=KRTCAP2	17.583	144.7	129.3	119.9	135.7	190.2	178	139.3	195.9	2.728	0	160.73	1	1233	1371
J3KPS0	DnaJ (Hsp40) homolog, subfamily B, member 12, isoform CRA_c OS=Homo sapiens GN=DNAJB12 PE=1 SV=1	45.462	163.9	129.7	125.8	115.1	238.8	194.4	122	142.3	0.52	0	124.137	3	1232	1372
Q9BW72	HIG1 domain family member 2A, mitochondrial OS=Homo sapiens GN=HIGD2A PE=1 SV=1	11.521	156.3	130.7	123.5	147.2	196.5	180.2	141.5	154.2	1.512	0	25.29	1	1230.1	1373
O43324	Eukaryotic translation elongation factor 1 epsilon-1 OS=Homo sapiens GN=EEF1E1 PE=1 SV=1	19.798	136.8	110.7	150.3	199.8	174.8	163.6	145.6	147.8	0.585	0	76.1633	2	1229.4	1374
A0A0B4J1V8	HCG2039996 OS=Homo sapiens GN=PPAN-P2RY11 PE=3 SV=1	87.862	195.9	118.3	113.2	136.9	222.3	174.2	124.4	142.3	0.227	0	63.6	4	1227.5	1375
Q6NXE6	Armadillo repeat-containing protein 6 OS=Homo sapiens GN=ARMC6 PE=1 SV=2	54.107	168.3	136.3	136.2	150.8	202.5	159.4	127.5	146.1	0.532	0	127.48	5	1227.1	1376
Q9BQB6	Vitamin K epoxide reductase complex subunit 1 OS=Homo sapiens GN=VKORC1 PE=1 SV=1	18.223	143.2	128.7	118.6	138.2	201.6	168.5	137.5	190.2	9	0	92.87	4	1226.5	1377
P13647	Keratin, type II cytoskeletal 5 OS=Homo sapiens GN=KRT5 PE=1 SV=3	62.34	145.9	106.2	133.8	208.2	199.1	134.7	145.5	152.9	0.931	0	108.35	9	1226.3	1378
P36543	V-type proton ATPase subunit E 1 OS=Homo sapiens GN=ATP6V1E1 PE=1 SV=1	26.129	131.2	112.5	145.6	218.1	158.7	156.2	142.3	160	0.334	0	44.46	2	1224.6	1379
Q12788	Transducin beta-like protein 3 OS=Homo sapiens GN=TBL3 PE=1 SV=2	88.978	184.7	124.9	120.5	128.8	235.1	178.3	123.1	127.7	0.151	0	122.277	3	1223.1	1380
Q14692	Ribosome biogenesis protein BMS1 homolog OS=Homo sapiens GN=BMS1 PE=1 SV=1	145.716	169.5	122.1	118.8	173.7	201.4	162.3	118.9	153.1	0.147	0	71.6867	4	1219.8	1381
E9PFW3	AP-2 complex subunit mu OS=Homo sapiens GN=AP2M1 PE=1 SV=1	52.27	169.7	120.1	120.4	160.5	203.9	171.2	116.7	154.7	0.16	0	44.75	2	1217.2	1382
P41227	N-alpha-acetyltransferase 10 OS=Homo sapiens GN=NAA10 PE=1 SV=1	26.442	149.1	117.5	134.9	154	202.7	174.9	140.5	143	1.054	0	100.07	4	1216.6	1383
Q9H6R4	Nucleolar protein 6 OS=Homo sapiens GN=NOL6 PE=1 SV=2	127.513	155.8	124.4	108.5	133.7	205.9	176.2	132.2	179.3	0.269	0	113.49	6	1216	1384
Q5VZE5	N-alpha-acetyltransferase 35, NatC auxiliary subunit OS=Homo sapiens GN=NAA35 PE=1 SV=1	83.584	156	119.3	133.2	163.6	191.8	159.7	123.6	161	0.113	0	25.4	2	1208.2	1385
Q9Y4P1-2	Isoform 2 of Cysteine protease ATG4B OS=Homo sapiens GN=ATG4B	52.495	133.6	122.5	118.6	175.7	175.1	165.5	138.9	177.4	0.233	0	56.04	2	1207.3	1386
A0A140TA86	MICOS complex subunit MIC13 OS=Homo sapiens GN=C19orf70 PE=1 SV=1	15.426	205.9	85.8	79.6	99.9	306.8	132.9	95.4	199.7	3.217	0	130.083	3	1206	1387
Q9UBE0	SUMO-activating enzyme subunit 1 OS=Homo sapiens GN=SAE1 PE=1 SV=1	38.426	129.6	111.9	128.2	180.8	162.6	174	137.8	177.6	0.35	0	34.6567	3	1202.5	1388
Q86SK9	Stearoyl-CoA desaturase 5 OS=Homo sapiens GN=SCD5 PE=1 SV=2	37.586	128.2	129.8	130.4	157.8	176.8	181.6	131.1	164.9	0.931	0	68.35	3	1200.6	1389
Q9NX47	E3 ubiquitin-protein ligase MARCH5 OS=Homo sapiens GN=MARCH5 PE=1 SV=1	31.211	145.9	118.6	134.9	159.7	178.6	178.6	131.9	147.9	0.292	0	48.72	2	1196.1	1390
O00400	Acetyl-coenzyme A transporter 1 OS=Homo sapiens GN=SLC33A1 PE=1 SV=1	60.87	123.9	153.6	136.6	169	166.9	172.3	119.8	152.3	0.172	0	85.19	2	1194.4	1391
O00233	26S proteasome non-ATPase regulatory subunit 9 OS=Homo sapiens GN=PSMD9 PE=1 SV=3	24.667	132.1	106.8	127.1	164.9	166.6	163.6	149.4	183.6	0.874	0	68.32	3	1194.1	1392
P34931	Heat shock 70 kDa protein 1-like OS=Homo sapiens GN=HSPA1L PE=1 SV=2	70.331	174.7	100	81.9	154.3	217.3	166.2	127.3	171.8	6.444	0	1721.6	16	1193.5	1393
O76061	Stanniocalcin-2 OS=Homo sapiens GN=STC2 PE=1 SV=1	33.227	220.7	236.6	164.1	176.8	122	93.7	77.8	101	0.359	0	48.56	2	1192.7	1394
Q9Y676	28S ribosomal protein S18b, mitochondrial OS=Homo sapiens GN=MRPS18B PE=1 SV=1	29.377	173.2	124.6	117.7	153.1	212.3	159	112.3	137.1	0.585	0	97.5833	3	1189.3	1395
P30740	Leukocyte elastase inhibitor OS=Homo sapiens GN=SERPINB1 PE=1 SV=1	42.715	133.1	120	131.5	178.9	174.6	165.3	143.3	142.1	0.222	0	53.93	2	1188.8	1396
O60294	tRNA wybutosine-synthesizing protein 4 OS=Homo sapiens GN=LCMT2 PE=1 SV=3	75.554	133.7	115.7	133.4	205.4	166.3	152.8	124.3	156.6	0.166	0	56.07	2	1188.2	1397
E7EW20	Unconventional myosin-VI OS=Homo sapiens GN=MYO6 PE=1 SV=2	149.774	135.1	115.3	126.2	181.9	172.1	154.6	139.2	163.7	0.357	0	223.81	10	1188.1	1398
Q8N9T8	Protein KRI1 homolog OS=Homo sapiens GN=KRI1 PE=1 SV=3	82.548	153.3	118.6	103.8	149.3	210.4	171.3	121.9	158.3	0.403	0	96.77	5	1186.9	1399
Q9H9A6	Leucine-rich repeat-containing protein 40 OS=Homo sapiens GN=LRRC40 PE=1 SV=1	68.207	125.6	122	125.2	187.3	169.6	144.2	126.2	183.5	0.512	0	189.32	7	1183.6	1400
Q8N5K1	CDGSH iron-sulfur domain-containing protein 2 OS=Homo sapiens GN=CISD2 PE=1 SV=1	15.268	138.5	113.9	114.9	147.5	185.1	169.4	129.2	180.1	4.995	0	84.9043	4	1178.6	1401
Q9UJA5	tRNA (adenine(58)-N(1))-methyltransferase non-catalytic subunit TRM6 OS=Homo sapiens GN=TRMT6 PE=1 SV=1	55.764	141.2	107.1	113.8	142.3	210	167.3	132.6	162.8	0.322	0	76.8167	4	1177.1	1402
P52732	Kinesin-like protein KIF11 OS=Homo sapiens GN=KIF11 PE=1 SV=2	119.085	144.1	108	144	156.2	204.4	155	124.3	140.3	0.202	0	109.6	5	1176.3	1403
P48506	Glutamate--cysteine ligase catalytic subunit OS=Homo sapiens GN=GCLC PE=1 SV=2	72.719	133.7	110.8	133.2	165.4	194.3	150.6	135.7	149.4	0.133	0	0	1	1173.1	1404
Q96FC9	Probable ATP-dependent DNA helicase DDX11 OS=Homo sapiens GN=DDX11 PE=1 SV=1	108.244	140.5	123.6	134.6	162.3	208	163.4	118.2	122	0.126	0	43.5933	3	1172.6	1405
Q92947	Glutaryl-CoA dehydrogenase, mitochondrial OS=Homo sapiens GN=GCDH PE=1 SV=1	48.096	186.2	115.9	96.3	151.2	235	146.5	103	137.6	0.08	0	34.52	1	1171.7	1406
Q6NZY4	Zinc finger CCHC domain-containing protein 8 OS=Homo sapiens GN=ZCCHC8 PE=1 SV=2	78.529	156.4	119.6	126	151.4	208.5	160.6	113.5	135	0.125	0	70.54	2	1171	1407
Q99707	Methionine synthase OS=Homo sapiens GN=MTR PE=1 SV=2	140.437	148.4	119	128.7	138.5	200.2	168.1	126	141.9	0.062	0	30.56	2	1170.8	1408
Q9BRX8	Redox-regulatory protein FAM213A OS=Homo sapiens GN=FAM213A PE=1 SV=3	25.747	149.8	138.3	119.2	144.8	188.1	163.6	126.2	140.2	0.166	0	28	1	1170.2	1409
Q9BQA9	Uncharacterized protein C17orf62 OS=Homo sapiens GN=C17orf62 PE=1 SV=1	20.761	157.1	116.5	116.1	139.1	215.4	158.8	109.6	151.9	0.874	0	28.8267	3	1164.5	1410
P11172	Uridine 5'-monophosphate synthase OS=Homo sapiens GN=UMPS PE=1 SV=1	52.189	130.1	119.6	124.5	146.8	195.6	165.3	112.5	169.5	0.374	0	70.33	4	1163.9	1411
Q02241	Kinesin-like protein KIF23 OS=Homo sapiens GN=KIF23 PE=1 SV=3	109.99	156.7	112.4	123.3	165.3	182.2	167.1	122	134.8	0.083	0	54.71	2	1163.8	1412
Q07812-2	Isoform Beta of Apoptosis regulator BAX OS=Homo sapiens GN=BAX	24.204	143.9	107.2	123.2	156.2	174.1	156.2	133.2	168.3	1.054	0	75.9167	4	1162.3	1413
P12277	Creatine kinase B-type OS=Homo sapiens GN=CKB PE=1 SV=1	42.617	117.7	96	127.9	177.8	184.6	157.9	135	161.9	0.35	0	42.5533	3	1158.8	1414
P63220	40S ribosomal protein S21 OS=Homo sapiens GN=RPS21 PE=1 SV=1	9.106	173.7	107.3	102.7	100.3	260.5	174.5	110.4	127.7	4.179	0	209.99	4	1157.1	1415
Q00587	Cdc42 effector protein 1 OS=Homo sapiens GN=CDC42EP1 PE=1 SV=1	40.27	150.2	106.6	113.1	136.8	228.7	162.8	123.1	135.1	0.413	0	78.61	3	1156.4	1416
Q8NBQ5	Estradiol 17-beta-dehydrogenase 11 OS=Homo sapiens GN=HSD17B11 PE=1 SV=3	32.915	152.2	119	123.4	145.1	169	178.6	127.5	140	0.833	0	127.39	5	1154.8	1417
Q9UN86	Ras GTPase-activating protein-binding protein 2 OS=Homo sapiens GN=G3BP2 PE=1 SV=2	54.088	173.3	123.4	114.2	132.7	190.2	158.8	118.5	143.6	0.166	0	41.85	2	1154.7	1418
Q9NPL8	Complex I assembly factor TIMMDC1, mitochondrial OS=Homo sapiens GN=TIMMDC1 PE=1 SV=2	32.158	139.7	110.8	116.3	149.4	171	165.8	123.8	176.7	0.668	0	116.36	3	1153.5	1419
Q9BVV7	Mitochondrial import inner membrane translocase subunit Tim21 OS=Homo sapiens GN=TIMM21 PE=1 SV=1	28.185	135.8	122.5	109.2	158.1	171.9	137.2	131.4	186.9	0.438	0	62.3367	2	1153	1420
Q9UBU6	Protein FAM8A1 OS=Homo sapiens GN=FAM8A1 PE=1 SV=1	44.095	137.3	122.9	99.2	116.8	176.2	212.8	145.4	140.6	2.34	0	261.546	9	1151.2	1421
P05067	Amyloid beta A4 protein OS=Homo sapiens GN=APP PE=1 SV=3	86.888	155.7	130.3	122	172	181.6	154.2	109.7	123.6	0.174	0	57.1467	3	1149.1	1422
Q9H300	Presenilins-associated rhomboid-like protein, mitochondrial OS=Homo sapiens GN=PARL PE=1 SV=2	42.163	143.8	146	122	155.7	149	159.6	114.5	156.7	0.719	0	91.21	4	1147.3	1423
X6R3N0	Long-chain fatty acid transport protein 3 OS=Homo sapiens GN=SLC27A3 PE=1 SV=1	87.269	160.1	121	110.7	130.8	208.4	161.9	112.4	141.5	0.133	0	15.7	2	1146.8	1424
Q9UKV5	E3 ubiquitin-protein ligase AMFR OS=Homo sapiens GN=AMFR PE=1 SV=2	72.949	150.9	124.2	121.8	146.5	171.3	159.1	126.4	145.4	0.389	0	57.47	3	1145.6	1425
O95298	NADH dehydrogenase [ubiquinone] 1 subunit C2 OS=Homo sapiens GN=NDUFC2 PE=1 SV=1	14.178	123.6	111.6	106.3	134.9	145.6	193.3	146.7	178.6	0.259	0	21.83	1	1140.6	1426
P61158	Actin-related protein 3 OS=Homo sapiens GN=ACTR3 PE=1 SV=3	47.341	135.9	117.7	131.8	152	187.4	161.7	122.8	127.8	0.35	0	56.97	3	1137.1	1427
Q7LGA3	Heparan sulfate 2-O-sulfotransferase 1 OS=Homo sapiens GN=HS2ST1 PE=1 SV=1	41.854	124.7	106.5	119.7	159.2	177	158	117.9	172.5	0.413	0	20.29	3	1135.5	1428
H7C0E7	Protein ARV1 (Fragment) OS=Homo sapiens GN=ARV1 PE=1 SV=1	33.199	123.9	118.8	117.4	139.4	190.2	161.4	130.3	151.9	0.359	0	34.93	2	1133.3	1429
Q5UIP0	Telomere-associated protein RIF1 OS=Homo sapiens GN=RIF1 PE=1 SV=2	274.294	156.1	112.5	102.6	128.1	231.5	158.7	113.6	130.2	0.05	0	13.25	2	1133.3	1430
C9JJ19	28S ribosomal protein S34, mitochondrial OS=Homo sapiens GN=MRPS34 PE=1 SV=2	26.316	137.7	110.6	143	148.1	181.6	159.3	111.9	138.4	0.54	0	21.7	3	1130.6	1431
Q8NCG7	Sn1-specific diacylglycerol lipase beta OS=Homo sapiens GN=DAGLB PE=1 SV=2	73.684	131	114.8	118.5	159.5	165.5	141.8	126.7	168.9	0.066	0	29.86	1	1126.7	1432
Q13126-2	Isoform 2 of S-methyl-5'-thioadenosine phosphorylase OS=Homo sapiens GN=MTAP	38.331	133.4	120.6	117.3	166	171.6	144	121.7	151.8	0.233	0	13.11	2	1126.4	1433
Q969E2	Secretory carrier-associated membrane protein 4 OS=Homo sapiens GN=SCAMP4 PE=1 SV=1	25.711	140.5	115.4	126	142.6	180.6	159.5	122.9	138.1	2.981	0	33.17	2	1125.6	1434
Q05519	Serine/arginine-rich splicing factor 11 OS=Homo sapiens GN=SRSF11 PE=1 SV=1	53.51	142	115	115.1	153.4	194.2	159	115	131.3	0.145	0	24.22	1	1125	1435
Q8IXM3	39S ribosomal protein L41, mitochondrial OS=Homo sapiens GN=MRPL41 PE=1 SV=1	15.373	152.3	103.5	108.4	126.8	205	170.3	121.4	136.6	0.931	0	46.6	2	1124.3	1436
Q5VV89	Microsomal glutathione S-transferase 3 OS=Homo sapiens GN=MGST3 PE=1 SV=1	18.405	118.6	119.2	120	142.5	159.7	171.5	116.9	172.4	0.334	0	31.01	1	1120.8	1437
Q7Z417	Nuclear fragile X mental retardation-interacting protein 2 OS=Homo sapiens GN=NUFIP2 PE=1 SV=1	76.075	156.4	108.1	111.2	157.9	227.9	136.8	105.5	116.5	0.433	0	24.26	5	1120.3	1438
Q8N6T3-2	Isoform 2 of ADP-ribosylation factor GTPase-activating protein 1 OS=Homo sapiens GN=ARFGAP1	45.648	138.3	104.9	109.5	131.9	219.3	171.5	117.4	124.9	0.334	0	117.18	3	1117.7	1439
Q8TCD1	UPF0729 protein C18orf32 OS=Homo sapiens GN=C18orf32 PE=3 SV=1	8.664	131.2	127.7	123.9	145.1	178.3	150.4	112.5	147.7	0.585	0	31.48	1	1116.8	1440
Q9C0E8-4	Isoform 4 of Protein lunapark OS=Homo sapiens GN=LNP	50.817	144.2	124.9	121.8	165.9	137.5	145	116.6	159.5	0.492	0	69.45	3	1115.4	1441
Q68CQ7	Glycosyltransferase 8 domain-containing protein 1 OS=Homo sapiens GN=GLT8D1 PE=1 SV=2	41.909	137.9	119.2	123.4	145.8	171.8	159.7	124.1	129.5	0.688	0	87.7767	5	1111.4	1442
B1AHD1	NHP2-like protein 1 OS=Homo sapiens GN=SNU13 PE=1 SV=1	14.618	152.9	125.2	97.5	135.9	189.1	153.1	115.6	139.8	0.668	0	64.91	2	1109.1	1443
P53992	Protein transport protein Sec24C OS=Homo sapiens GN=SEC24C PE=1 SV=3	118.249	138	106.2	115.1	142.3	164.4	161.7	128.3	151.7	0.271	0	58.2233	5	1107.7	1444
Q9UIC8-2	Isoform 2 of Leucine carboxyl methyltransferase 1 OS=Homo sapiens GN=LCMT1	41.079	139.1	108.8	113.6	145.5	181.4	162.8	119.1	135.8	0.105	0	33.42	1	1106.1	1445
Q13144	Translation initiation factor eIF-2B subunit epsilon OS=Homo sapiens GN=EIF2B5 PE=1 SV=3	80.329	152.3	112.8	108.7	125.7	208.9	153.8	114.7	127.3	0.133	0	36.39	2	1104.2	1446
Q9H8M7	Protein FAM188A OS=Homo sapiens GN=FAM188A PE=1 SV=1	49.693	129.1	116.1	133.9	170.5	146.2	144.9	119.3	144.1	0.202	0	23.33	2	1104.1	1447
Q9Y6C9	Mitochondrial carrier homolog 2 OS=Homo sapiens GN=MTCH2 PE=1 SV=1	33.309	111.2	115.7	117.7	153.4	164.5	159.1	113.2	168.7	0.778	0	167.65	4	1103.5	1448
Q99567	Nuclear pore complex protein Nup88 OS=Homo sapiens GN=NUP88 PE=1 SV=2	83.489	168.8	118.2	112.1	128.5	198.7	154.7	97.9	117.6	0.343	0	109.83	5	1096.5	1449
Q00577	Transcriptional activator protein Pur-alpha OS=Homo sapiens GN=PURA PE=1 SV=2	34.889	140.9	107.7	107.6	136.2	181.6	155	117.2	148.3	0.145	0	57.11	1	1094.5	1450
E9PL57	Protein NEDD8-MDP1 (Fragment) OS=Homo sapiens GN=NEDD8-MDP1 PE=4 SV=1	19.524	118.3	102.3	118.9	163	167.2	141.7	124.6	157.9	0.212	0	16.53	1	1093.9	1451
P38432	Coilin OS=Homo sapiens GN=COIL PE=1 SV=1	62.57	122.3	122.8	113.1	167.3	145.6	140.2	128.9	152.9	0.141	0	24.73	2	1093.1	1452
P48739-3	Isoform 3 of Phosphatidylinositol transfer protein beta isoform OS=Homo sapiens GN=PITPNB	31.68	113.6	107.7	119.7	149.4	178.8	150.4	123.3	148.9	0.334	0	110.852	3	1091.8	1453
Q86XZ4	Spermatogenesis-associated serine-rich protein 2 OS=Homo sapiens GN=SPATS2 PE=1 SV=1	59.508	136.6	104.6	104.5	167	202.9	153.5	107	114.8	0.145	0	43.1751	2	1090.9	1454
Q96DH6	RNA-binding protein Musashi homolog 2 OS=Homo sapiens GN=MSI2 PE=1 SV=1	35.174	166.4	102.7	87.9	110.6	226	167	111.4	118.5	0.425	0	49.94	1	1090.5	1455
Q32MZ4	Leucine-rich repeat flightless-interacting protein 1 OS=Homo sapiens GN=LRRFIP1 PE=1 SV=2	89.199	114	103.8	123.7	166.9	163	154.1	115.5	149.3	0.05	0	0	1	1090.3	1456
Q9NUQ3	Gamma-taxilin OS=Homo sapiens GN=TXLNG PE=1 SV=2	60.548	117.6	109.5	126.2	150.3	162.5	144.4	124.5	154	0.212	0	107.433	3	1089	1457
P07196	Neurofilament light polypeptide OS=Homo sapiens GN=NEFL PE=1 SV=3	61.479	169.9	121.8	96.2	109.1	220.7	138.8	104.3	128.1	0.482	0	121.11	6	1088.9	1458
Q6ZN17	Protein lin-28 homolog B OS=Homo sapiens GN=LIN28B PE=1 SV=1	27.066	158.6	115.1	115.1	130.3	179.1	143.4	115.6	131.4	0.259	0	58.94	2	1088.6	1459
Q01130	Serine/arginine-rich splicing factor 2 OS=Homo sapiens GN=SRSF2 PE=1 SV=4	25.461	132.7	112.6	111.2	161.3	162.2	160.2	103.1	137.6	1.31	0	190.213	3	1080.9	1460
P62873	Guanine nucleotide-binding protein G(I)/G(S)/G(T) subunit beta-1 OS=Homo sapiens GN=GNB1 PE=1 SV=3	37.353	141	107.4	124.6	145.9	168.8	139.3	119.9	133.3	0.848	0	86.3967	3	1080.2	1461
Q8NI36	WD repeat-containing protein 36 OS=Homo sapiens GN=WDR36 PE=1 SV=1	105.255	128.8	149	106.9	155.7	152.4	133.7	128.5	122.9	0.145	0	45.19	3	1077.9	1462
Q8ND56	Protein LSM14 homolog A OS=Homo sapiens GN=LSM14A PE=1 SV=3	50.499	112.4	99.3	124.8	170.2	150.7	149.8	121.8	148.5	0.823	0	93.05	6	1077.5	1463
Q9BZX2	Uridine-cytidine kinase 2 OS=Homo sapiens GN=UCK2 PE=1 SV=1	29.281	128.6	113.8	125.7	161.9	148.4	135.9	127.2	134.9	0.54	0	88.4933	3	1076.4	1464
P26639-2	Isoform 2 of Threonine--tRNA ligase, cytoplasmic OS=Homo sapiens GN=TARS	86.806	131.7	107.7	123	154.5	176	146.2	105.9	131.2	0.6	0	146.384	10	1076.2	1465
Q8TEQ8	GPI ethanolamine phosphate transferase 3 OS=Homo sapiens GN=PIGO PE=1 SV=3	118.623	130	99.4	115.9	150.9	175.9	143.8	109.3	148.2	0.207	0	53.7133	4	1073.4	1466
G3V556	6.8 kDa mitochondrial proteolipid OS=Homo sapiens GN=C14orf2 PE=1 SV=1	11.274	130.9	100.3	118.1	129.8	190.6	161.3	107.5	134.2	5.31	0	0	2	1072.7	1467
P19367-3	Isoform 3 of Hexokinase-1 OS=Homo sapiens GN=HK1	102.672	130.4	97.8	109.5	137.1	162.4	156.9	127	148.9	0.28	0	57.8333	6	1070	1468
Q9UBR2	Cathepsin Z OS=Homo sapiens GN=CTSZ PE=1 SV=1	33.846	152	122	122	188.3	126.8	125.4	105.4	127.9	0.155	0	29.26	1	1069.8	1469
Q13435	Splicing factor 3B subunit 2 OS=Homo sapiens GN=SF3B2 PE=1 SV=2	100.165	117.2	97	119.1	163.1	144.4	146.7	114.1	165	0.363	0	90.2556	7	1066.6	1470
A0A0B4J220	Chromosome 11 open reading frame 48, isoform CRA_c OS=Homo sapiens GN=C11orf98 PE=1 SV=1	14.225	159.7	110.4	94	102.8	219.1	153.6	100.3	125.7	3.217	0	81.74	4	1065.6	1471
A5PLL7	Transmembrane protein 189 OS=Homo sapiens GN=TMEM189 PE=1 SV=3	31.115	116.2	121.5	116.4	152.5	147.9	135.3	118.8	156.6	0.194	0	20.27	1	1065.2	1472
P38919	Eukaryotic initiation factor 4A-III OS=Homo sapiens GN=EIF4A3 PE=1 SV=4	46.841	115.4	108.9	109.8	175.7	143.8	164.8	108.4	138	0.585	0	71.8167	5	1064.8	1473
Q7Z6Z7	E3 ubiquitin-protein ligase HUWE1 OS=Homo sapiens GN=HUWE1 PE=1 SV=3	481.589	119.8	108.3	126.9	164.8	160.1	137.9	115	128.7	0.086	0	112.353	8	1061.5	1474
Q92922	SWI/SNF complex subunit SMARCC1 OS=Homo sapiens GN=SMARCC1 PE=1 SV=3	122.79	115	111.1	112.2	136.7	154.3	143.6	121.4	166.7	0.118	0	32.9	3	1061	1475
P35251	Replication factor C subunit 1 OS=Homo sapiens GN=RFC1 PE=1 SV=4	128.175	142.6	102.2	100.8	121.4	211.9	151.9	120.4	108.1	0.191	0	94.66	4	1059.3	1476
P25788	Proteasome subunit alpha type-3 OS=Homo sapiens GN=PSMA3 PE=1 SV=2	28.415	118.3	95.6	130.4	161.1	151.6	141.4	113.9	144.9	0.179	0	20.12	1	1057.2	1477
P20042	Eukaryotic translation initiation factor 2 subunit 2 OS=Homo sapiens GN=EIF2S2 PE=1 SV=2	38.364	118.1	94	131.8	160.9	171.5	131.6	109.7	139.6	0.11	0	30.22	1	1057.2	1478
Q9GZS1-2	Isoform 2 of DNA-directed RNA polymerase I subunit RPA49 OS=Homo sapiens GN=POLR1E	47.23	138.5	101.5	96.8	117.8	200.3	164.7	101.9	133	0.186	0	42.41	2	1054.5	1479
Q9NQ88	Fructose-2,6-bisphosphatase TIGAR OS=Homo sapiens GN=TIGAR PE=1 SV=1	30.043	100.4	93.3	110.3	223.3	131	133.9	111.8	149.1	0.848	0	97.88	3	1053.1	1480
Q9Y3T6	R3H and coiled-coil domain-containing protein 1 OS=Homo sapiens GN=R3HCC1 PE=1 SV=2	53.227	146.8	123.6	116.8	154.4	146.7	125.5	94.7	141.7	0.08	0	15.74	1	1050.2	1481
Q5SQN1	Synaptosomal-associated protein 47 OS=Homo sapiens GN=SNAP47 PE=1 SV=3	52.529	142.1	113.7	115	133.9	171.8	143	109.8	120.9	0.15	0	47.89	2	1050.2	1482
P13804	Electron transfer flavoprotein subunit alpha, mitochondrial OS=Homo sapiens GN=ETFA PE=1 SV=1	35.058	139.5	107.9	102.2	128.2	184.1	152.8	104.6	129.2	0.222	0	78.95	2	1048.5	1483
P05026	Sodium/potassium-transporting ATPase subunit beta-1 OS=Homo sapiens GN=ATP1B1 PE=1 SV=1	35.039	113	109.1	118	163	146.1	147.4	120.4	130.1	0.968	0	61.3167	4	1047.1	1484
Q96BD8	Spindle and kinetochore-associated protein 1 OS=Homo sapiens GN=SKA1 PE=1 SV=1	29.465	116.1	89.1	121.7	176.2	142	133.6	126.1	140.6	0.292	0	21.43	2	1045.4	1485
P01774	Ig heavy chain V-III region POM OS=Homo sapiens PE=1 SV=1	12.945	114.7	97.1	106.4	134.6	164.5	151.1	126.3	150	2.728	0	191.319	1	1044.7	1486
Q9UL54	Serine/threonine-protein kinase TAO2 OS=Homo sapiens GN=TAOK2 PE=1 SV=2	138.166	139.2	115.5	102.8	110.5	194.9	162.3	103.8	115.2	0.076	0	0	2	1044.2	1487
Q9UJX3	Anaphase-promoting complex subunit 7 OS=Homo sapiens GN=ANAPC7 PE=1 SV=4	66.813	121.6	107.1	110.7	135.6	206.1	142.3	106.2	113	0.225	0	22.39	3	1042.6	1488
P40938	Replication factor C subunit 3 OS=Homo sapiens GN=RFC3 PE=1 SV=2	40.53	100.6	108.4	120	150.6	169.5	144.4	121	127.1	0.292	0	41.9	3	1041.6	1489
Q9Y520-7	Isoform 7 of Protein PRRC2C OS=Homo sapiens GN=PRRC2C	316.888	123.1	105.9	121.6	149.1	159.9	142.3	113.8	125.5	0.09	0	114.16	5	1041.2	1490
O75955	Flotillin-1 OS=Homo sapiens GN=FLOT1 PE=1 SV=3	47.326	116.8	94.2	121.4	143	152.5	126.2	108	178	0.562	0	141.35	6	1040.1	1491
J3KN66	Torsin-1A-interacting protein 1 OS=Homo sapiens GN=TOR1AIP1 PE=1 SV=1	67.781	143.8	109.5	99.6	129.3	181.7	139.9	106.4	129.8	0.136	0	26.6	2	1040	1492
Q9Y6I9	Testis-expressed sequence 264 protein OS=Homo sapiens GN=TEX264 PE=1 SV=1	34.167	131.7	112	119.9	138.1	145.5	152.2	109	128.6	0.501	0	39.54	3	1037	1493
Q9BXJ9	N-alpha-acetyltransferase 15, NatA auxiliary subunit OS=Homo sapiens GN=NAA15 PE=1 SV=1	101.208	112.9	99.9	116.2	123.7	173.2	149.5	116.8	144.5	0.038	0	14.22	1	1036.7	1494
P35249	Replication factor C subunit 4 OS=Homo sapiens GN=RFC4 PE=1 SV=2	39.657	125.7	100.7	102.2	137.3	188.4	135.6	104.8	140.5	0.532	0	36.4	5	1035.2	1495
O43707	Alpha-actinin-4 OS=Homo sapiens GN=ACTN4 PE=1 SV=2	104.788	109.1	98.3	105.6	168.7	145.9	140.6	101.5	163.3	0.34	0	71.73	8	1033	1496
J3KPT4	TraB domain-containing protein OS=Homo sapiens GN=TRABD PE=1 SV=1	42.665	119.8	108.7	116.7	126.6	182.4	148.8	108.3	118.5	0.52	0	88.7833	3	1029.8	1497
P53701	Cytochrome c-type heme lyase OS=Homo sapiens GN=HCCS PE=1 SV=1	30.582	126.2	99.9	115.4	138.8	165.3	143.1	105.4	131.2	0.501	0	42.09	3	1025.3	1498
Q14558-2	Isoform 2 of Phosphoribosyl pyrophosphate synthase-associated protein 1 OS=Homo sapiens GN=PRPSAP1	42.44	105.6	90.1	120.1	145.7	138.4	160.3	117.6	143.4	0.093	0	18.73	1	1021.2	1499
Q9H4A6	Golgi phosphoprotein 3 OS=Homo sapiens GN=GOLPH3 PE=1 SV=1	33.79	104.9	104.7	109.1	142.2	147.9	140.1	116.9	149.1	0.668	0	88.43	3	1014.9	1500
Q9H9J2	39S ribosomal protein L44, mitochondrial OS=Homo sapiens GN=MRPL44 PE=1 SV=1	37.512	123.4	95.6	111.3	133	152.3	143	122.2	132.8	0.233	0	55.35	2	1013.6	1501
Q9HD33	39S ribosomal protein L47, mitochondrial OS=Homo sapiens GN=MRPL47 PE=1 SV=2	29.432	145.4	85	97.6	113.2	167.3	150	117.4	137.4	0.468	0	38.6058	3	1013.3	1502
P53367	Arfaptin-1 OS=Homo sapiens GN=ARFIP1 PE=1 SV=2	41.713	116.2	99.1	111.9	152.1	132.2	135.6	121.5	142.2	0.292	0	36.84	3	1010.8	1503
P43003	Excitatory amino acid transporter 1 OS=Homo sapiens GN=SLC1A3 PE=1 SV=1	59.534	137.2	103.5	89.3	109.3	208.6	138.3	96.1	126	0.122	0	15.75	1	1008.3	1504
O00161	Synaptosomal-associated protein 23 OS=Homo sapiens GN=SNAP23 PE=1 SV=1	23.34	108.3	97.7	106.7	147.1	163.5	143.2	111.9	129.4	0.389	0	61.26	2	1007.8	1505
Q9BQ61	Uncharacterized protein C19orf43 OS=Homo sapiens GN=C19orf43 PE=1 SV=1	18.408	108.1	90.9	128.5	166.3	118	121	124.7	148.5	0.778	0	38.82	3	1006	1506
Q9NRX1	RNA-binding protein PNO1 OS=Homo sapiens GN=PNO1 PE=1 SV=1	27.907	144.3	98.3	72.6	102.2	240.3	142.4	88.2	116.5	0.968	0	59.7233	5	1004.8	1507
Q96BW5	Phosphotriesterase-related protein OS=Homo sapiens GN=PTER PE=1 SV=1	38.993	101.7	100.3	119.7	175.5	108.6	119.9	130.5	145.9	0.468	0	83.43	3	1002.1	1508
P11717	Cation-independent mannose-6-phosphate receptor OS=Homo sapiens GN=IGF2R PE=1 SV=3	274.199	120.8	102.7	109.7	142.5	157.1	132.2	102.3	128.4	0.066	0	22.9867	4	995.7	1509
Q6P1K2-5	Isoform 5 of Polyamine-modulated factor 1 OS=Homo sapiens GN=PMF1	24.017	110.3	94.1	110.3	144.7	141.6	132.9	116.4	144.6	0.359	0	64.16	1	994.9	1510
Q92552-2	Isoform 2 of 28S ribosomal protein S27, mitochondrial OS=Homo sapiens GN=MRPS27	49.119	132.1	96.6	98.1	203.3	166	121.3	91.5	84.8	0.468	0	147.74	5	993.7	1511
Q9BQ75	Protein CMSS1 OS=Homo sapiens GN=CMSS1 PE=1 SV=2	31.864	156.4	108.1	86.4	96	192.2	150.7	97.3	106.4	0.166	0	25.56	1	993.5	1512
Q96IW7	Vesicle-trafficking protein SEC22a OS=Homo sapiens GN=SEC22A PE=1 SV=1	34.925	133.2	119	134.2	152.7	127.9	120.9	99.7	105.8	0.638	0	162.29	2	993.4	1513
Q9H6F5	Coiled-coil domain-containing protein 86 OS=Homo sapiens GN=CCDC86 PE=1 SV=1	40.211	138.9	107.9	89.4	117.5	159.3	146.1	109.2	122.5	0.116	0	32.22	1	990.8	1514
O96008	Mitochondrial import receptor subunit TOM40 homolog OS=Homo sapiens GN=TOMM40 PE=1 SV=1	37.869	103.3	94.6	108.4	139.6	138.2	150.7	114.8	139.2	0.778	0	108.753	3	988.8	1515
H0Y2M6	Chloride channel 7, isoform CRA_c OS=Homo sapiens GN=CLCN7 PE=1 SV=1	97.169	106.9	121.8	95.5	140.2	155.5	125.8	100.9	140.5	0.125	0	44.08	2	987.1	1516
Q14573	Inositol 1,4,5-trisphosphate receptor type 3 OS=Homo sapiens GN=ITPR3 PE=1 SV=2	303.912	107.6	104.5	107.2	146.5	138.4	135.9	105.8	141	0.094	0	162.99	6	986.9	1517
Q86W42	THO complex subunit 6 homolog OS=Homo sapiens GN=THOC6 PE=1 SV=1	37.511	128.6	106.1	95.3	130	167	139.3	106.8	113.7	0.259	0	33.12	2	986.8	1518
P56937	3-keto-steroid reductase OS=Homo sapiens GN=HSD17B7 PE=1 SV=1	38.182	128.7	89.2	98.6	111.5	161.1	156.5	102	138.7	0.274	0	46.06	1	986.3	1519
P33991	DNA replication licensing factor MCM4 OS=Homo sapiens GN=MCM4 PE=1 SV=5	96.498	138.2	104.3	102	131.8	167.9	140.4	89.5	111.4	0.094	0	43.99	2	985.5	1520
A0A0B4J1S4	15 kDa selenoprotein OS=Homo sapiens GN=SEP15 PE=1 SV=1	18.033	139.1	102.3	138.3	171.1	180.3	37.2	32.9	184	1.154	0	117.863	2	985.2	1521
P09429	High mobility group protein B1 OS=Homo sapiens GN=HMGB1 PE=1 SV=3	24.878	110.5	97.7	118.2	145.1	150.7	138.2	104.8	115.8	0.233	0	21.74	1	981	1522
Q9Y3C6	Peptidyl-prolyl cis-trans isomerase-like 1 OS=Homo sapiens GN=PPIL1 PE=1 SV=1	18.225	132.2	97.5	104.5	140.8	154.7	131.7	94.8	122.4	0.585	0	25.02	2	978.6	1523
P50748	Kinetochore-associated protein 1 OS=Homo sapiens GN=KNTC1 PE=1 SV=1	250.588	116.4	95.6	102.5	146	145.4	119.7	109.6	142.2	0.054	0	53.58	3	977.4	1524
Q92504	Zinc transporter SLC39A7 OS=Homo sapiens GN=SLC39A7 PE=1 SV=2	50.087	66.1	79.8	99	108.8	119.4	114.3	164.3	224.3	0.52	0	20.07	2	976	1525
Q9UDY8	Mucosa-associated lymphoid tissue lymphoma translocation protein 1 OS=Homo sapiens GN=MALT1 PE=1 SV=1	92.213	107.9	90.2	105.3	138.8	144.9	132.3	112.5	143.7	0.307	0	55.2	5	975.6	1526
Q92804	TATA-binding protein-associated factor 2N OS=Homo sapiens GN=TAF15 PE=1 SV=1	61.793	157.2	102.7	73	111.5	195.5	151.4	87.3	94	0.334	0	102.398	3	972.6	1527
Q04323-2	Isoform 2 of UBX domain-containing protein 1 OS=Homo sapiens GN=UBXN1	35.086	114.2	94.7	107	134.4	157.6	137.5	103.1	121.1	0.359	0	69.56	2	969.6	1528
Q13445	Transmembrane emp24 domain-containing protein 1 OS=Homo sapiens GN=TMED1 PE=1 SV=1	25.19	149.7	152.4	205.4	188.1	76.8	72.8	53.5	69.6	3.642	0	99.89	5	968.3	1529
O95140	Mitofusin-2 OS=Homo sapiens GN=MFN2 PE=1 SV=3	86.347	119.4	101.4	99.9	111.7	181.4	144.3	97	111	0.585	0	131.53	9	966.1	1530
Q86WV6	Stimulator of interferon genes protein OS=Homo sapiens GN=TMEM173 PE=1 SV=1	42.166	98.9	95.3	109.4	143.8	120.8	125.9	127.2	144.7	0.129	0	31.15	1	966	1531
Q5T7W0	Zinc finger protein 618 OS=Homo sapiens GN=ZNF618 PE=1 SV=1	104.889	99.6	93.1	113.6	150.8	119	131.9	108.5	144.6	0.131	0	40.57	2	961.1	1532
A0A087WUM0	Protein SYNJ2BP-COX16 (Fragment) OS=Homo sapiens GN=SYNJ2BP-COX16 PE=4 SV=1	20.762	120.6	98.5	92	122.6	164.2	130.7	111.4	119.5	1.31	0	118.25	3	959.5	1533
B3KR50	cDNA FLJ33691 fis, clone BRAWH2002976, highly similar to GROWTH FACTOR RECEPTOR-BOUND PROTEIN 2 OS=Homo sapiens PE=2 SV=1	25.178	108.7	96.8	115.7	148.8	115.5	126.1	117.3	130	0.896	0	33.4467	5	958.9	1534
Q6P158	Putative ATP-dependent RNA helicase DHX57 OS=Homo sapiens GN=DHX57 PE=1 SV=2	155.507	125	102.3	89.8	117.6	185	138.2	93.2	107.6	0.089	0	100.377	3	958.7	1535
O95757	Heat shock 70 kDa protein 4L OS=Homo sapiens GN=HSPA4L PE=1 SV=3	94.453	114.1	86.4	79.6	118.5	184.1	141.9	102.5	129.5	0.208	0	109.133	5	956.6	1536
Q14534	Squalene monooxygenase OS=Homo sapiens GN=SQLE PE=1 SV=3	63.882	128.7	98.1	104.8	115.4	161.5	132.6	103.1	107.2	0.133	0	47.12	2	951.4	1537
Q5H8A4	GPI ethanolamine phosphate transferase 2 OS=Homo sapiens GN=PIGG PE=1 SV=1	108.103	124.8	142	144.5	148.2	112	100.1	92.2	84.4	0.11	0	57.67	1	948.2	1538
H7C1N3	BET1 homolog (Fragment) OS=Homo sapiens GN=BET1 PE=1 SV=1	14.973	107.5	120.1	124.9	129.8	113.7	124.2	111.2	112.7	0.778	0	66.2	1	944.1	1539
B3KS98	Eukaryotic translation initiation factor 3 subunit H OS=Homo sapiens GN=EIF3H PE=1 SV=1	41.555	97.1	78.6	104.8	137.3	165.3	136.4	104.1	120.5	0.212	0	36.2	2	944.1	1540
Q9H8H2	Probable ATP-dependent RNA helicase DDX31 OS=Homo sapiens GN=DDX31 PE=1 SV=2	94.029	132	95.4	91.9	107.3	188.8	121.7	88.7	117.4	0.194	0	63.04	4	943.2	1541
H3BSS5	BTB/POZ domain-containing protein KCTD5 OS=Homo sapiens GN=KCTD5 PE=1 SV=1	27.109	114.5	90.6	112	123.2	130.3	130.5	107.4	133.9	0.166	0	40.32	1	942.4	1542
P35914	Hydroxymethylglutaryl-CoA lyase, mitochondrial OS=Homo sapiens GN=HMGCL PE=1 SV=2	34.338	113.6	97.4	97.2	127.9	146.4	126.8	106.8	126.1	0.136	0	25.92	1	942.2	1543
O75475	PC4 and SFRS1-interacting protein OS=Homo sapiens GN=PSIP1 PE=1 SV=1	60.067	111.7	102.5	109.2	141.6	124.7	132.1	110.3	108.2	0.133	0	37.47	2	940.3	1544
A6NDU8	UPF0600 protein C5orf51 OS=Homo sapiens GN=C5orf51 PE=1 SV=1	33.599	96.9	87.2	119.2	155.4	120.1	120.1	112.4	126.4	0.668	0	62.55	3	937.7	1545
P63218	Guanine nucleotide-binding protein G(I)/G(S)/G(O) subunit gamma-5 OS=Homo sapiens GN=GNG5 PE=1 SV=3	7.314	117.1	100.9	108	159.7	120.3	119.3	96.7	113.6	0.585	0	30.74	1	935.6	1546
Q6IN85	Serine/threonine-protein phosphatase 4 regulatory subunit 3A OS=Homo sapiens GN=PPP4R3A PE=1 SV=1	95.308	111.4	86.8	105.6	142.3	127.7	125	106	127.8	0.101	0	70.24	2	932.6	1547
A0A0G2JH66	HLA class I histocompatibility antigen, alpha chain F OS=Homo sapiens GN=HLA-F PE=1 SV=1	50.396	106.6	100.2	110.4	153.2	145	119	95.8	102.3	0.468	0	77.67	3	932.5	1548
F8WA39	Myotubularin-related protein 1 OS=Homo sapiens GN=MTMR1 PE=1 SV=1	75.67	126.1	91	96.9	115.3	155.5	129	98	110.9	0.199	0	56.09	2	922.7	1549
Q9BUR5	MICOS complex subunit MIC26 OS=Homo sapiens GN=APOO PE=1 SV=1	22.271	121.9	97.8	84.3	112.3	150.6	139.1	93.2	123.4	0.425	0	59.35	2	922.6	1550
Q6P1M0	Long-chain fatty acid transport protein 4 OS=Homo sapiens GN=SLC27A4 PE=1 SV=1	72.018	124.9	92	86.3	115.8	148.7	127	103.4	119.2	0.679	0	116.133	9	917.3	1551
Q5J8M3	ER membrane protein complex subunit 4 OS=Homo sapiens GN=EMC4 PE=1 SV=2	20.073	87.5	94.7	93.3	115.7	108	126.8	123.4	162	0.585	0	98.79	2	911.4	1552
Q9H0C8	Integrin-linked kinase-associated serine/threonine phosphatase 2C OS=Homo sapiens GN=ILKAP PE=1 SV=1	42.88	102.1	91.7	102.6	120.3	138.3	119	96	136.9	0.179	0	54.9	2	906.9	1553
Q15008-4	Isoform 4 of 26S proteasome non-ATPase regulatory subunit 6 OS=Homo sapiens GN=PSMD6	51.889	113.1	99.6	117.9	134.8	158.1	100.7	69.8	112.3	0.145	0	45	2	906.3	1554
O43251-8	Isoform 8 of RNA binding protein fox-1 homolog 2 OS=Homo sapiens GN=RBFOX2	47.314	146.7	84.1	88.1	99.4	189.1	123.1	82.4	90.9	0.54	0	100.66	3	903.8	1555
Q9Y3B9	RRP15-like protein OS=Homo sapiens GN=RRP15 PE=1 SV=2	31.465	130.9	100.6	66.9	104.6	164.2	115.2	89.6	130.9	0.334	0	21.65	2	902.9	1556
Q99653	Calcineurin B homologous protein 1 OS=Homo sapiens GN=CHP1 PE=1 SV=3	22.442	104.8	93.7	105.6	123.6	143.8	121.2	99.5	108.7	1.929	0	172.507	5	900.9	1557
Q96SU4-6	Isoform 6 of Oxysterol-binding protein-related protein 9 OS=Homo sapiens GN=OSBPL9	84.202	100.3	90.1	82	105.2	166.7	140.9	84.1	128.2	0.068	0	17.89	1	897.5	1558
P59190	Ras-related protein Rab-15 OS=Homo sapiens GN=RAB15 PE=1 SV=1	24.375	94.6	76.2	100.6	137.6	129.6	123.9	102.9	130.6	0.501	0	66.84	2	896	1559
Q9NYK5-2	Isoform 2 of 39S ribosomal protein L39, mitochondrial OS=Homo sapiens GN=MRPL39	40.432	113.2	83.4	82.9	101.5	170.2	128.4	98.9	112.1	0.222	0	32.4	2	890.6	1560
P62891	60S ribosomal protein L39 OS=Homo sapiens GN=RPL39 PE=1 SV=2	6.403	144.7	88.2	81.3	87.1	184.8	132.1	74.3	94.9	999	0	29.06	1	887.4	1561
P16989	Y-box-binding protein 3 OS=Homo sapiens GN=YBX3 PE=1 SV=4	40.066	129.4	93.9	74.9	95.8	184	121.7	76.9	103.8	2.981	2	520.955	9	880.4	1562
Q15526	Surfeit locus protein 1 OS=Homo sapiens GN=SURF1 PE=1 SV=1	33.31	125.9	83.2	95.2	107.3	162.6	121.1	80.6	104.3	0.122	0	85.79	1	880.2	1563
Q8WVY7	Ubiquitin-like domain-containing CTD phosphatase 1 OS=Homo sapiens GN=UBLCP1 PE=1 SV=2	36.781	94.7	86.3	102	124.3	136.5	127.6	96	112.3	0.122	0	33.51	1	879.7	1564
Q96FX7	tRNA (adenine(58)-N(1))-methyltransferase catalytic subunit TRMT61A OS=Homo sapiens GN=TRMT61A PE=1 SV=1	31.362	110	79.8	83.2	87.1	172.6	128	106.1	108.7	0.155	0	41.41	1	875.5	1565
Q96GM8	Target of EGR1 protein 1 OS=Homo sapiens GN=TOE1 PE=1 SV=1	56.512	95.3	85.4	91.3	136.3	115.6	108.2	107.4	130.9	0.318	0	110.967	3	870.4	1566
Q9BSJ2-4	Isoform 3 of Gamma-tubulin complex component 2 OS=Homo sapiens GN=TUBGCP2	105.561	117	91.3	89.2	105.7	159	126.6	85.8	95.6	0.308	0	64.38	7	870.2	1567
Q9P2W9	Syntaxin-18 OS=Homo sapiens GN=STX18 PE=1 SV=1	38.65	98	98.8	112.5	134.2	109.7	111.3	99.4	103.2	0.585	0	97.69	5	867.1	1568
Q9Y256	CAAX prenyl protease 2 OS=Homo sapiens GN=RCE1 PE=1 SV=1	35.809	107.1	91.7	86	103.1	146.7	110.8	99.1	122.5	0.585	0	50.4233	3	867	1569
Q9BQQ3	Golgi reassembly-stacking protein 1 OS=Homo sapiens GN=GORASP1 PE=1 SV=3	46.454	112.6	89.2	99.7	116.2	147	113.1	88	100.7	1.154	0	40.56	3	866.5	1570
A0A0D9SF60	Plakophilin-4 OS=Homo sapiens GN=PKP4 PE=1 SV=1	133.886	94.5	93.6	102.5	108.6	139.3	119.4	92.8	110.7	0.065	0	43.16	2	861.4	1571
Q92820	Gamma-glutamyl hydrolase OS=Homo sapiens GN=GGH PE=1 SV=2	35.941	108	78.7	114.6	126.1	131.3	116.1	81.6	100.2	0.129	0	29.29	1	856.6	1572
E7ESZ7	NADH dehydrogenase [ubiquinone] 1 alpha subcomplex subunit 10, mitochondrial OS=Homo sapiens GN=NDUFA10 PE=1 SV=1	44.71	91	76.8	88.2	99.9	130.4	134.5	113	121.5	0.509	0	111.21	5	855.3	1573
Q5HYK3	2-methoxy-6-polyprenyl-1,4-benzoquinol methylase, mitochondrial OS=Homo sapiens GN=COQ5 PE=1 SV=2	37.117	107.6	82.6	94.2	117.1	143.8	121.7	83.5	104.8	0.334	0	43.8467	2	855.3	1574
B3KMT2	cDNA FLJ12511 fis, clone NT2RM2001727, highly similar to Homo sapiens ubiquitin protein ligase E3 component n-recognin 4 (UBR4), mRNA OS=Homo sapiens PE=2 SV=1	91.973	104.2	83.1	92.1	112.8	153	118	88.9	102.8	0.094	0	45.78	2	854.9	1575
P35580-4	Isoform 4 of Myosin-10 OS=Homo sapiens GN=MYH10	232.385	86.3	83.1	93.3	126.4	129.2	130.4	100.8	105.2	0.093	0	102.487	5	854.7	1576
Q14157-5	Isoform 5 of Ubiquitin-associated protein 2-like OS=Homo sapiens GN=UBAP2L	116.569	107.6	83	91	136.6	137.7	111.8	88.6	97.1	0.136	0	126.58	2	853.4	1577
Q8N3C0	Activating signal cointegrator 1 complex subunit 3 OS=Homo sapiens GN=ASCC3 PE=1 SV=3	251.301	107.3	93.5	83.5	103.4	155.6	123.1	87.7	96.2	0.128	0	63.61	6	850.3	1578
Q9NSE4	Isoleucine--tRNA ligase, mitochondrial OS=Homo sapiens GN=IARS2 PE=1 SV=2	113.719	112.2	83.2	97.2	114.4	137	116.6	92.1	94.6	0.086	0	51.55	2	847.3	1579
Q9UHF1	Epidermal growth factor-like protein 7 OS=Homo sapiens GN=EGFL7 PE=1 SV=3	29.598	133.8	84.3	99.9	173.5	99.3	70.1	73.8	112.3	0.334	0	44.02	2	847	1580
Q96A35	39S ribosomal protein L24, mitochondrial OS=Homo sapiens GN=MRPL24 PE=1 SV=1	24.899	106	98	78.8	105.9	131.2	128	90.1	108	0.334	0	61.84	2	846	1581
Q49A26	Putative oxidoreductase GLYR1 OS=Homo sapiens GN=GLYR1 PE=1 SV=3	60.518	127.6	82.1	80.1	85	165	117.9	85.7	101	0.346	0	52.07	3	844.4	1582
Q96QR8	Transcriptional activator protein Pur-beta OS=Homo sapiens GN=PURB PE=1 SV=3	33.22	110.6	85.5	80.8	105.3	153.2	119.1	75.7	112.1	0.274	0	41.24	3	842.3	1583
Q9H583	HEAT repeat-containing protein 1 OS=Homo sapiens GN=HEATR1 PE=1 SV=3	242.215	99.4	89.8	92.4	142.5	113.8	98.2	85.2	119.4	0.054	0	55.31	3	840.7	1584
Q9HC07	Transmembrane protein 165 OS=Homo sapiens GN=TMEM165 PE=1 SV=1	34.883	106.2	91.1	91.4	107.6	134.7	117	91.5	101	0.54	0	89.3967	2	840.5	1585
A0A087WWE2	DNA-directed RNA polymerase subunit OS=Homo sapiens GN=POLR2A PE=1 SV=1	218.067	103.1	88.9	95.7	127.5	126.8	116.1	73.7	108.5	0.044	0	23.25	2	840.3	1586
Q8TD19	Serine/threonine-protein kinase Nek9 OS=Homo sapiens GN=NEK9 PE=1 SV=2	107.1	89.1	84.6	105.3	134.9	116.1	120.1	97.1	92.6	0.194	0	69.65	4	839.8	1587
O14957	Cytochrome b-c1 complex subunit 10 OS=Homo sapiens GN=UQCR11 PE=3 SV=1	6.565	108	77.5	71.5	84.6	150.1	132.5	96.4	118.3	9	0	67.79	1	838.9	1588
Q9NVJ2	ADP-ribosylation factor-like protein 8B OS=Homo sapiens GN=ARL8B PE=1 SV=1	21.525	102	88	91.2	108.5	137.3	117.6	89.8	103.7	0.212	0	32.99	1	838.1	1589
O75821	Eukaryotic translation initiation factor 3 subunit G OS=Homo sapiens GN=EIF3G PE=1 SV=2	35.589	84.2	84.3	98.7	113.1	150.4	112.8	94	99.5	0.413	0	92.76	3	837	1590
P14735	Insulin-degrading enzyme OS=Homo sapiens GN=IDE PE=1 SV=4	117.893	95.4	85.6	87.5	125.2	119.6	113.4	97.8	110.6	0.245	0	50.6	5	835.1	1591
P61160	Actin-related protein 2 OS=Homo sapiens GN=ACTR2 PE=1 SV=1	44.732	107	86.8	78.8	141.8	124.9	111.1	87.9	93	0.11	0	56.49	1	831.3	1592
O95486	Protein transport protein Sec24A OS=Homo sapiens GN=SEC24A PE=1 SV=2	119.674	91.8	86.9	101.2	128.3	111.9	120.6	84.7	104.4	0.379	0	80.71	6	829.8	1593
Q12959-2	Isoform 2 of Disks large homolog 1 OS=Homo sapiens GN=DLG1	103.258	94.4	76.2	101.1	121.5	135.7	101.2	93.6	105.7	0.053	0	19.18	1	829.4	1594
F5GXJ1	NADH dehydrogenase [ubiquinone] iron-sulfur protein 7, mitochondrial OS=Homo sapiens GN=NDUFS7 PE=1 SV=1	25.367	96.7	78.6	76.6	101.8	113.5	134.8	104.2	123.1	0.778	0	100.82	3	829.3	1595
P30084	Enoyl-CoA hydratase, mitochondrial OS=Homo sapiens GN=ECHS1 PE=1 SV=4	31.367	80.2	69.8	96.3	137.6	119	111.9	95.2	118.8	0.413	0	113.027	3	828.8	1596
O60287	Nucleolar pre-ribosomal-associated protein 1 OS=Homo sapiens GN=URB1 PE=1 SV=4	254.227	97.7	92.1	88.3	93.1	155.8	112.9	87.3	100.9	0.019	0	25.4	1	828.1	1597
Q9H3H5	UDP-N-acetylglucosamine--dolichyl-phosphate N-acetylglucosaminephosphotransferase OS=Homo sapiens GN=DPAGT1 PE=1 SV=2	46.059	97.2	81.7	92.3	114.4	121.4	113.3	85	122.6	1.424	0	69.09	3	827.9	1598
Q96A54	Adiponectin receptor protein 1 OS=Homo sapiens GN=ADIPOR1 PE=1 SV=1	42.588	107.7	100.2	107.3	109.8	116.3	103.7	85.2	96	0.155	0	24.37	1	826.2	1599
Q96SI9	Spermatid perinuclear RNA-binding protein OS=Homo sapiens GN=STRBP PE=1 SV=1	73.606	119.7	83.7	77.3	89.8	159.4	110.4	79.7	105.5	0.342	0	162.154	3	825.5	1600
Q9UNM6-2	Isoform 2 of 26S proteasome non-ATPase regulatory subunit 13 OS=Homo sapiens GN=PSMD13	42.915	81.6	72	102	133.8	109.5	102	101.6	122.3	0.292	0	40.6033	3	824.8	1601
O14965	Aurora kinase A OS=Homo sapiens GN=AURKA PE=1 SV=2	45.781	105.5	77.2	81.9	107.4	142.6	107.5	86.3	110.2	0.334	0	62.4667	3	818.6	1602
Q4KMQ2-2	Isoform 2 of Anoctamin-6 OS=Homo sapiens GN=ANO6	108.362	92.8	88.1	101.5	124.8	127.7	108	77.6	96.7	0.142	0	28.07	3	817.2	1603
U3KQB3	Casein kinase I isoform gamma-1 OS=Homo sapiens GN=CSNK1G1 PE=1 SV=1	54.447	100.4	100.8	88.9	116.9	114.6	113.6	97	84.3	0.172	0	0	2	816.5	1604
Q9BVK8	Transmembrane protein 147 OS=Homo sapiens GN=TMEM147 PE=1 SV=1	25.244	127	52.3	51.6	137.6	177.3	69.4	52.6	147.6	0.778	0	87.72	3	815.4	1605
P16989-2	Isoform 2 of Y-box-binding protein 3 OS=Homo sapiens GN=YBX3	31.928	111.2	92.1	75.9	109	141.5	118.6	73.1	93.3	3.642	0	467.313	7	814.7	1606
Q9Y6D0	Selenoprotein K OS=Homo sapiens GN=SELK PE=1 SV=3	10.639	80.5	77.3	85.2	75.3	132.9	142.5	111.8	108.4	0.931	0	62.03	2	813.9	1607
Q8N8R3	Mitochondrial basic amino acids transporter OS=Homo sapiens GN=SLC25A29 PE=1 SV=2	32.042	109.8	77.3	84.3	108.5	114	116.1	83.6	118.6	0.145	0	17.49	1	812.2	1608
Q9GZS3	WD repeat-containing protein 61 OS=Homo sapiens GN=WDR61 PE=1 SV=1	33.56	115.5	77.9	91.6	93.8	140	110	83.2	95.4	0.145	0	48.1	1	807.4	1609
Q96MV1	Transmembrane protein 56 OS=Homo sapiens GN=TMEM56 PE=1 SV=1	30.021	86	81.6	105.2	105	115.6	117	91.7	104.8	0.166	0	41.64	1	806.9	1610
P52789	Hexokinase-2 OS=Homo sapiens GN=HK2 PE=1 SV=2	102.313	98.2	81.7	82	114.3	138	117.9	78.4	96.4	0.091	0	40.84	2	806.9	1611
Q9Y5Q9	General transcription factor 3C polypeptide 3 OS=Homo sapiens GN=GTF3C3 PE=1 SV=1	101.208	100	72.1	86.7	102.3	137.4	119.4	89.2	99.5	0.158	0	84.63	3	806.6	1612
P58107	Epiplakin OS=Homo sapiens GN=EPPK1 PE=1 SV=2	555.279	92	83.4	103.1	131.1	114.6	112	83.6	85.3	0.022	0	43.84	3	805.1	1613
Q9ULH0	Kinase D-interacting substrate of 220 kDa OS=Homo sapiens GN=KIDINS220 PE=1 SV=3	196.419	77.2	79.1	96.5	117.4	109.7	98	92.5	133.5	0.046	0	19.26	2	803.9	1614
Q06787	Synaptic functional regulator FMR1 OS=Homo sapiens GN=FMR1 PE=1 SV=1	71.131	78.5	78.1	83	104.8	133.3	112.8	94.1	116.8	0.259	0	64.8167	3	801.4	1615
Q8WUA4	General transcription factor 3C polypeptide 2 OS=Homo sapiens GN=GTF3C2 PE=1 SV=2	100.616	113.5	76.4	79.9	87	142.5	118.4	76.6	106.9	0.17	0	32.65	3	801.2	1616
Q9NP58	ATP-binding cassette sub-family B member 6, mitochondrial OS=Homo sapiens GN=ABCB6 PE=1 SV=1	93.826	101	88.5	93.5	116	122.2	103.2	79	97.5	0.17	0	94.76	3	800.9	1617
Q9BU61	NADH dehydrogenase [ubiquinone] 1 alpha subcomplex assembly factor 3 OS=Homo sapiens GN=NDUFAF3 PE=1 SV=1	20.337	88.6	80.4	88.2	122.2	114.3	119.2	89.4	98.1	0.468	0	29.97	2	800.4	1618
P58546	Myotrophin OS=Homo sapiens GN=MTPN PE=1 SV=2	12.887	82.2	80.5	95.7	128.9	108.5	100.8	91.5	112.2	2.162	0	33.8133	4	800.3	1619
B3KU60	cDNA FLJ39235 fis, clone OCBBF2007829, highly similar to Mus musculus fatso protein OS=Homo sapiens PE=2 SV=1	58.273	86.2	75.9	78.3	117.3	119.8	118.7	82.6	120.2	0.241	0	83.7467	3	799	1620
E9PAV3	Nascent polypeptide-associated complex subunit alpha, muscle-specific form OS=Homo sapiens GN=NACA PE=1 SV=1	205.295	90.9	78.9	81.4	109.4	160.5	106	85.1	85.2	0.126	0	117.168	4	797.4	1621
P45954	Short/branched chain specific acyl-CoA dehydrogenase, mitochondrial OS=Homo sapiens GN=ACADSB PE=1 SV=1	47.455	114.4	91.7	73.3	97.8	141.8	103.5	76.1	96.6	0.089	0	61.71	1	795.2	1622
Q5U5J2	CSNK2A1 protein OS=Homo sapiens GN=CSNK2A1 PE=1 SV=1	45.879	96.1	83.3	83.4	111.4	126.8	120.1	94.7	79	0.688	0	104.19	5	794.8	1623
O95857	Tetraspanin-13 OS=Homo sapiens GN=TSPAN13 PE=2 SV=1	22.133	98.5	84.6	89.9	97	114.9	108.1	75.6	125	1.371	0	37.54	3	793.6	1624
Q16576	Histone-binding protein RBBP7 OS=Homo sapiens GN=RBBP7 PE=1 SV=1	47.79	100.2	81.8	83.4	98	143.1	116.5	79.1	88.7	1.818	0	158.28	7	790.8	1625
Q8WUM4-2	Isoform 2 of Programmed cell death 6-interacting protein OS=Homo sapiens GN=PDCD6IP	96.711	92.5	73	90.2	133	100.5	113.4	85	102.2	0.341	0	159.03	7	789.8	1626
Q52LJ0-2	Isoform 2 of Protein FAM98B OS=Homo sapiens GN=FAM98B	45.519	87.7	119	66.4	109.9	115.2	97.4	75.9	118.1	0.172	0	41.41	2	789.6	1627
Q92747	Actin-related protein 2/3 complex subunit 1A OS=Homo sapiens GN=ARPC1A PE=1 SV=2	41.543	101.6	78.2	100.4	118.1	107.3	105.5	77.9	99.8	0.101	0	35.35	1	788.8	1628
E7ERR0	Kelch domain-containing protein 3 OS=Homo sapiens GN=KLHDC3 PE=1 SV=2	43.81	96.8	81.4	83	121.3	118.1	103.7	82.7	100.5	0.245	0	61.68	1	787.5	1629
Q15287	RNA-binding protein with serine-rich domain 1 OS=Homo sapiens GN=RNPS1 PE=1 SV=1	34.188	87.3	83.9	75.4	150.8	108.3	105.4	81.7	94.2	0.585	0	86.92	3	787	1630
Q8WUM9	Sodium-dependent phosphate transporter 1 OS=Homo sapiens GN=SLC20A1 PE=1 SV=1	73.652	98.6	80.5	86.3	97.9	136	105.8	77.7	103.2	0.08	0	25.27	1	786	1631
Q8IY95	Transmembrane protein 192 OS=Homo sapiens GN=TMEM192 PE=1 SV=1	30.903	80.4	83.7	99.7	125	115.4	98.8	83.1	97.7	0.166	0	46.36	1	783.8	1632
P56181-2	Isoform 2 of NADH dehydrogenase [ubiquinone] flavoprotein 3, mitochondrial OS=Homo sapiens GN=NDUFV3	50.953	79.9	78.8	73.2	109.7	106.3	115.1	99	117.6	0.16	0	64.13	2	779.6	1633
P61221	ATP-binding cassette sub-family E member 1 OS=Homo sapiens GN=ABCE1 PE=1 SV=1	67.271	98.5	73.3	81	102.8	133.6	116	79.6	94.6	0.066	0	34.94	1	779.4	1634
Q92547	DNA topoisomerase 2-binding protein 1 OS=Homo sapiens GN=TOPBP1 PE=1 SV=3	170.571	91	82.4	83.8	108.1	108.9	103.2	77.9	122.5	0.027	0	23	1	777.8	1635
Q14683	Structural maintenance of chromosomes protein 1A OS=Homo sapiens GN=SMC1A PE=1 SV=2	143.144	95.8	77.8	76.1	101.4	125.1	116	78.1	107.2	0.054	0	36.22	2	777.5	1636
Q9NX76	CKLF-like MARVEL transmembrane domain-containing protein 6 OS=Homo sapiens GN=CMTM6 PE=1 SV=1	20.406	100.1	80.3	83.4	108.2	124.1	106.9	88	84.4	0.389	0	33.85	1	775.4	1637
Q1ED39	Lysine-rich nucleolar protein 1 OS=Homo sapiens GN=KNOP1 PE=1 SV=1	51.557	115.7	83.9	58.6	80.8	172.9	103.6	73.1	86.6	0.186	0	13.01	2	775.2	1638
Q9BSR8	Protein YIPF4 OS=Homo sapiens GN=YIPF4 PE=1 SV=1	27.065	99.9	80.7	86.7	112	120.6	99.8	81.1	93.9	2.162	0	59.6	3	774.7	1639
Q9GZY4	Cytochrome c oxidase assembly factor 1 homolog OS=Homo sapiens GN=COA1 PE=1 SV=1	16.684	100.6	81.2	84	98.7	128.3	117.1	76.3	87.8	0.259	0	53.63	1	774	1640
O76071	Probable cytosolic iron-sulfur protein assembly protein CIAO1 OS=Homo sapiens GN=CIAO1 PE=1 SV=1	37.816	108.3	73	83.8	90	130.6	105.3	79.8	102.4	0.896	0	139.31	5	773.2	1641
Q15050	Ribosome biogenesis regulatory protein homolog OS=Homo sapiens GN=RRS1 PE=1 SV=2	41.168	104.4	80.9	86.7	111.6	119.3	99.9	76.2	92.8	0.334	0	51.41	3	771.8	1642
Q9UKA9-3	Isoform 3 of Polypyrimidine tract-binding protein 2 OS=Homo sapiens GN=PTBP2	58.048	90.9	84.2	80	104.4	126	110.3	83.4	92.2	0.202	0	72.2833	2	771.4	1643
Q9H900	Protein zwilch homolog OS=Homo sapiens GN=ZWILCH PE=1 SV=2	67.172	100.4	84.3	87.2	120	104.5	99.7	77.4	97.5	0.072	0	0	1	771	1644
J3QLS3	28S ribosomal protein S7, mitochondrial OS=Homo sapiens GN=MRPS7 PE=1 SV=1	31.684	95.7	79.5	82.4	98.7	129	98.1	83.3	103.8	0.438	0	49.33	3	770.5	1645
Q12894-2	Isoform 2 of Interferon-related developmental regulator 2 OS=Homo sapiens GN=IFRD2	65.557	105.5	74.7	104.2	83.9	125.8	111.4	85.4	77.3	0.269	0	21.88	3	768.2	1646
Q5T9L3-2	Isoform 2 of Protein wntless homolog OS=Homo sapiens GN=WLS	62.51	76.2	87.7	95.3	96.3	115.6	108.5	89.3	97	0.61	0	94.85	5	765.9	1647
Q9Y584	Mitochondrial import inner membrane translocase subunit Tim22 OS=Homo sapiens GN=TIMM22 PE=1 SV=2	20.018	101	73.6	69.6	87.9	141.3	117.3	80.7	94.2	1.154	0	107.76	3	765.6	1648
Q9HB66	Alternative protein MKKS OS=Homo sapiens GN=MKKS PE=1 SV=1	7.259	91.5	67.5	78.1	118.6	117	109.3	85	98.5	0.778	0	61.31	1	765.5	1649
O75880	Protein SCO1 homolog, mitochondrial OS=Homo sapiens GN=SCO1 PE=1 SV=1	33.793	103.9	72.1	75.4	98.7	119.6	110.6	74	105.7	0.155	0	31.13	1	760	1650
Q99757	Thioredoxin, mitochondrial OS=Homo sapiens GN=TXN2 PE=1 SV=2	18.372	91.5	72	73.6	105.6	114.9	102.9	73	122.4	0.292	0	34.12	1	755.9	1651
Q8NHV4-3	Isoform 3 of Protein NEDD1 OS=Homo sapiens GN=NEDD1	72.665	78.3	81.5	84.7	109.4	108.2	101.9	84.5	107.4	0.205	0	33.31	3	755.9	1652
Q9UHV9	Prefoldin subunit 2 OS=Homo sapiens GN=PFDN2 PE=1 SV=1	16.638	87.2	85.9	80	93.3	115.7	105.4	85.6	95.6	0.778	0	101.523	2	748.7	1653
Q5T4S7-2	Isoform 2 of E3 ubiquitin-protein ligase UBR4 OS=Homo sapiens GN=UBR4	575.592	99.1	68.7	72.8	87.1	145.4	111.2	75	87.5	0.059	0	102.063	7	746.8	1654
Q9NWU2	Glucose-induced degradation protein 8 homolog OS=Homo sapiens GN=GID8 PE=1 SV=1	26.732	85.8	68.3	74.8	110.5	123.1	104.2	75.7	103.3	0.638	0	92.01	3	745.7	1655
Q9UKM9	RNA-binding protein Raly OS=Homo sapiens GN=RALY PE=1 SV=1	32.444	95.2	82.4	70.2	114.2	107.3	108	74.3	93.9	0.122	0	33.3	1	745.5	1656
Q92890-1	Isoform Long of Ubiquitin fusion degradation protein 1 homolog OS=Homo sapiens GN=UFD1L	38.7	77.4	76.9	84.1	92.3	92.8	103.3	107.1	110.9	0.668	0	70.0733	4	744.8	1657
Q9BVG4	Protein PBDC1 OS=Homo sapiens GN=PBDC1 PE=1 SV=1	26.041	87.3	76.6	75.7	109.6	105.2	108.5	88.5	93.1	0.585	0	35.0667	2	744.5	1658
M0QYT0	Uncharacterized protein (Fragment) OS=Homo sapiens PE=1 SV=1	35.992	94.1	82.8	76.8	108.4	120.2	97.7	71.4	92.1	1.994	0	368.7	8	743.5	1659
Q9NY12	H/ACA ribonucleoprotein complex subunit 1 OS=Homo sapiens GN=GAR1 PE=1 SV=1	22.334	89.5	69.8	70.3	99.7	121	89.8	77.7	118.8	0.179	0	57.77	1	736.6	1660
O95372	Acyl-protein thioesterase 2 OS=Homo sapiens GN=LYPLA2 PE=1 SV=1	24.721	87.4	75.7	85.7	100.4	112.3	99.8	82.3	93	1.276	0	104.58	4	736.6	1661
H7BZM6	Striated muscle preferentially-expressed protein kinase (Fragment) OS=Homo sapiens GN=SPEG PE=1 SV=1	38.364	89.3	76.1	70.2	81.5	140.3	115.2	70.5	91.8	0.245	0	13.59	2	734.9	1662
O15228	Dihydroxyacetone phosphate acyltransferase OS=Homo sapiens GN=GNPAT PE=1 SV=1	77.138	89.4	71.6	72.5	97.8	122.7	99.9	79.5	101.2	0.239	0	83.64	4	734.6	1663
Q9H9P8	L-2-hydroxyglutarate dehydrogenase, mitochondrial OS=Homo sapiens GN=L2HGDH PE=1 SV=3	50.284	91.7	79.9	69.5	85	128.7	101.9	82.5	94.3	0.269	0	34.51	3	733.5	1664
O15355	Protein phosphatase 1G OS=Homo sapiens GN=PPM1G PE=1 SV=1	59.235	79.9	69.4	101	112.2	102.8	97.6	75.2	94.4	0.28	0	48.6	3	732.5	1665
P53041	Serine/threonine-protein phosphatase 5 OS=Homo sapiens GN=PPP5C PE=1 SV=1	56.842	75.8	88.1	76.1	117.4	95.3	101.7	80.7	95.9	0.16	0	43.12	2	731	1666
P78383	Solute carrier family 35 member B1 OS=Homo sapiens GN=SLC35B1 PE=1 SV=1	35.736	83	86	81.1	99.4	94.2	95.4	87.8	103.9	1.154	0	44.41	3	730.8	1667
Q86VP6	Cullin-associated NEDD8-dissociated protein 1 OS=Homo sapiens GN=CAND1 PE=1 SV=2	136.289	71.6	65.3	84.7	132.5	99.9	93.5	78.1	96.4	0.101	0	52.7933	3	722	1668
A0A096LP01	Protein LINC00493 OS=Homo sapiens GN=LINC00493 PE=1 SV=1	10.901	112.7	76.7	74.8	88.2	133.9	97.4	66.4	70.2	1.371	0	36.45	2	720.3	1669
O75438	NADH dehydrogenase [ubiquinone] 1 beta subcomplex subunit 1 OS=Homo sapiens GN=NDUFB1 PE=1 SV=1	6.957	72.6	61	76.3	90.6	104.9	130.7	96.3	85	9	0	40.2	2	717.4	1670
Q12874	Splicing factor 3A subunit 3 OS=Homo sapiens GN=SF3A3 PE=1 SV=1	58.812	89.1	68.4	74.6	102.9	111.7	100.9	78.3	90.7	0.28	0	40.24	3	716.6	1671
Q9UDX5	Mitochondrial fission process protein 1 OS=Homo sapiens GN=MTFP1 PE=1 SV=1	17.999	92.1	75.3	68.9	78.5	136.4	112	66.4	86.6	2.162	0	43.9833	5	716.2	1672
A0A087WUZ3	Spectrin beta chain, non-erythrocytic 1 OS=Homo sapiens GN=SPTBN1 PE=1 SV=1	274.659	79.7	66.7	83.6	99.5	111.8	101.7	78.6	94	0.029	0	27.24	2	715.6	1673
Q03135	Caveolin-1 OS=Homo sapiens GN=CAV1 PE=1 SV=4	20.458	71.5	68.1	83.7	110.8	82.6	92.2	99.4	105.5	0.468	0	60.25	2	713.8	1674
P18583-9	Isoform I of Protein SON OS=Homo sapiens GN=SON	267.923	103.1	88.2	73.4	85.8	113.1	95.4	66	88.4	0.204	0	169.139	7	713.4	1675
Q8WTV0	Scavenger receptor class B member 1 OS=Homo sapiens GN=SCARB1 PE=1 SV=1	60.838	75.1	84.3	90.4	101.4	102.3	94.9	79.6	84.6	0.083	0	26.38	1	712.6	1676
B1ALM5	Transmembrane protein 9 OS=Homo sapiens GN=TMEM9 PE=1 SV=1	20.945	70.8	66.6	63.5	80.7	89	84.5	67.1	189.9	0.468	0	44.49	2	712.1	1677
Q13347	Eukaryotic translation initiation factor 3 subunit I OS=Homo sapiens GN=EIF3I PE=1 SV=1	36.479	96.7	65.4	74.6	91.6	123.1	102.7	73.1	83.6	0.492	0	47.93	4	710.8	1678
P10155	60 kDa SS-A/Ro ribonucleoprotein OS=Homo sapiens GN=TROVE2 PE=1 SV=2	60.631	101	77.5	77.2	85.8	124.3	100.9	67.8	75.7	0.225	0	23.51	3	710.2	1679
Q16706	Alpha-mannosidase 2 OS=Homo sapiens GN=MAN2A1 PE=1 SV=2	131.057	87.2	72.6	69.2	106.9	103.8	92	80.6	97.4	0.308	0	87.6367	7	709.7	1680
Q6ZNB6	NF-X1-type zinc finger protein NFXL1 OS=Homo sapiens GN=NFXL1 PE=1 SV=2	101.27	95.6	74.7	67	83.3	118.6	101.7	75.9	87.1	0.224	0	71.69	5	703.9	1681
Q9NP81-2	Isoform 2 of Serine--tRNA ligase, mitochondrial OS=Homo sapiens GN=SARS2	57.994	82.8	71.7	81.5	95.8	111.4	97	74.9	81.1	0.233	0	35.11	3	696.2	1682
B5MDF5	GTP-binding nuclear protein Ran OS=Homo sapiens GN=RAN PE=1 SV=1	26.207	83.3	81.7	65.7	98.4	110.1	93.4	74.2	87	4.337	0	207.652	6	693.8	1683
Q9NUI1	Peroxisomal 2,4-dienoyl-CoA reductase OS=Homo sapiens GN=DECR2 PE=1 SV=1	30.758	85.2	59.7	70.7	99.2	108	100.4	74.9	95.6	0.122	0	25.36	1	693.7	1684
Q8IYS2-2	Isoform 2 of Uncharacterized protein KIAA2013 OS=Homo sapiens GN=KIAA2013	72.635	65.3	90.8	89	107.4	93.9	102.9	57.3	86.7	0.433	0	190.02	4	693.3	1685
Q8N983-7	Isoform 6 of 39S ribosomal protein L43, mitochondrial OS=Homo sapiens GN=MRPL43	28.658	70.3	65.1	70.4	108.7	98.5	104.7	85.5	89.8	0.585	0	28.93	2	693	1686
Q9Y2V2	Calcium-regulated heat-stable protein 1 OS=Homo sapiens GN=CARHSP1 PE=1 SV=2	15.882	71.4	67.1	93.9	127.2	76.3	74.9	69.7	108.6	0.668	0	52.93	2	689.1	1687
Q86U90	YrdC domain-containing protein, mitochondrial OS=Homo sapiens GN=YRDC PE=1 SV=1	29.309	87.4	74.7	73.4	91	101.4	98.6	71.3	89.1	0.585	0	107.227	3	686.9	1688
O76095	Protein JTB OS=Homo sapiens GN=JTB PE=1 SV=1	16.347	73.9	88.8	88	106.8	91.2	83.5	70.4	83.7	0.778	0	104.33	1	686.3	1689
Q15054	DNA polymerase delta subunit 3 OS=Homo sapiens GN=POLD3 PE=1 SV=2	51.368	87	70	65.6	79.2	118.6	106.5	64	95.4	0.086	0	40.62	1	686.3	1690
A0A0C4DG49	Poliovirus receptor OS=Homo sapiens GN=PVR PE=1 SV=1	45.292	85.3	67.4	74.7	86.9	111.8	97.2	75.8	85.8	0.212	0	17.03	1	684.9	1691
E9PQY2	Prefoldin subunit 4 OS=Homo sapiens GN=PFDN4 PE=1 SV=1	15.589	78.1	65.1	87.7	104.5	102.6	84	73.5	88.1	0.334	0	48.92	1	683.6	1692
Q9H2U1	ATP-dependent RNA helicase DHX36 OS=Homo sapiens GN=DHX36 PE=1 SV=2	114.688	73.4	74	69.9	97.1	105.3	83.1	68.1	111.1	0.366	0	120.323	7	682	1693
Q9H9T3	Elongator complex protein 3 OS=Homo sapiens GN=ELP3 PE=1 SV=2	62.219	82.6	81.3	75	96.1	107.3	92	70.6	77.1	0.145	0	53.3	2	682	1694
Q96QD8	Sodium-coupled neutral amino acid transporter 2 OS=Homo sapiens GN=SLC38A2 PE=1 SV=2	55.99	73.6	70.4	79.7	102.1	92.4	93	78.3	92.3	0.848	0	205.013	3	681.8	1695
Q9UQ35	Serine/arginine repetitive matrix protein 2 OS=Homo sapiens GN=SRRM2 PE=1 SV=2	299.438	80.9	76.8	60.9	101.2	87.6	87.9	72.2	113.9	0.03	0	15.38	2	681.4	1696
Q86U38	Nucleolar protein 9 OS=Homo sapiens GN=NOP9 PE=1 SV=1	69.394	109.9	71.8	65.2	69.2	135.9	92	65.8	70.8	0.189	0	57.1876	3	680.6	1697
Q14738	Serine/threonine-protein phosphatase 2A 56 kDa regulatory subunit delta isoform OS=Homo sapiens GN=PPP2R5D PE=1 SV=1	69.947	86.4	70.4	74.8	100	96.1	91.1	68.1	92.7	0.233	0	36.6603	3	679.6	1698
O60476	Mannosyl-oligosaccharide 1,2-alpha-mannosidase IB OS=Homo sapiens GN=MAN1A2 PE=1 SV=1	72.957	85.8	71.9	75.8	91.9	100.7	93.1	69.6	89.9	0.212	0	0	3	678.7	1699
P14678-3	Isoform SM-B1 of Small nuclear ribonucleoprotein-associated proteins B and B' OS=Homo sapiens GN=SNRPB	30.012	94.8	75.7	64.3	95.4	116.6	90.5	69.1	72.1	0.54	0	43.66	3	678.5	1700
Q0VDF9	Heat shock 70 kDa protein 14 OS=Homo sapiens GN=HSPA14 PE=1 SV=1	54.76	77.8	56.9	71.6	106.9	101.2	94.6	75.1	93.3	0.155	0	57.55	2	677.4	1701
Q5JSZ5	Protein PRRC2B OS=Homo sapiens GN=PRRC2B PE=1 SV=2	242.817	76	65.3	74	88.9	117.1	97.2	78.7	79.6	0.058	0	64.0067	3	676.8	1702
Q9Y5R8	Trafficking protein particle complex subunit 1 OS=Homo sapiens GN=TRAPPC1 PE=1 SV=1	16.821	82.6	68.1	80	97	108.9	91	76.8	72.4	0.212	0	50.69	1	676.8	1703
Q15397	Pumilio homolog 3 OS=Homo sapiens GN=PUM3 PE=1 SV=3	73.538	80.1	66.3	64	76.6	118	100.6	70.7	99.3	0.194	0	70.5133	3	675.6	1704
M0QYZ2	AP-2 complex subunit sigma OS=Homo sapiens GN=AP2S1 PE=1 SV=1	18.917	85.2	66.6	74	75.1	124	88.4	72.2	88.3	1.371	0	43.46	3	673.8	1705
Q5JRA6	Melanoma inhibitory activity protein 3 OS=Homo sapiens GN=MIA3 PE=1 SV=1	213.57	77.2	68.7	74	94.5	90.8	88.3	78.8	100.8	0.077	0	87.7	4	673.1	1706
A0A0U1RRK1	Calcium uptake protein 1, mitochondrial OS=Homo sapiens GN=MICU1 PE=1 SV=1	54.893	91.2	64.8	63.7	81.8	132.7	91.3	68.7	77.9	0.15	0	23.1	2	672.1	1707
Q8N5F7	NF-kappa-B-activating protein OS=Homo sapiens GN=NKAP PE=1 SV=1	47.11	94.1	63.8	68.3	101.9	105.5	101.3	62.5	72.3	0.274	0	29.22	2	669.7	1708
Q99543	DnaJ homolog subfamily C member 2 OS=Homo sapiens GN=DNAJC2 PE=1 SV=4	71.952	71.5	71.7	93.5	114.1	89.4	76.1	74	79	0.07	0	31.75	1	669.3	1709
Q8TEB9	Rhomboid-related protein 4 OS=Homo sapiens GN=RHBDD1 PE=1 SV=1	35.8	73.8	62.1	60.4	76.3	120.9	93.3	63.2	119	0.233	0	43.42	1	669	1710
Q9Y2X9	Zinc finger protein 281 OS=Homo sapiens GN=ZNF281 PE=1 SV=1	96.855	94.7	68.7	64.7	79.1	128.3	95.5	62.4	74.9	0.066	0	40.72	1	668.3	1711
Q6FI81	Anamorsin OS=Homo sapiens GN=CIAPIN1 PE=1 SV=2	33.561	71.5	68.3	75.8	110.2	75.4	87	73.7	105.7	0.73	0	57.3833	5	667.6	1712
Q14789-2	Isoform 2 of Golgin subfamily B member 1 OS=Homo sapiens GN=GOLGB1	376.907	75.1	67.3	69.5	82.4	116.4	90.2	78.8	86.3	0.03	0	51.69	3	666	1713
Q9HD23-4	Isoform 4 of Magnesium transporter MRS2 homolog, mitochondrial OS=Homo sapiens GN=MRS2	50.551	73.1	68	74.4	92.7	85.9	98.1	80.2	89.3	0.083	0	60.03	1	661.7	1714
O00231-2	Isoform 2 of 26S proteasome non-ATPase regulatory subunit 11 OS=Homo sapiens GN=PSMD11	47.505	69.2	67.2	86.4	103.2	98.1	86.6	73.8	76.8	0.155	0	51.25	2	661.3	1715
B3KP47	cDNA FLJ31151 fis, clone IMR322001541, highly similar to Probable ribosome biogenesis protein RLP24 OS=Homo sapiens PE=2 SV=1	19.555	88.4	65.6	60.3	71.2	138.6	93.8	69.1	73.8	2.162	0	86.5467	2	660.8	1716
O15037	Protein KHNYN OS=Homo sapiens GN=KHNYN PE=1 SV=3	74.487	88	70.3	72.1	102.5	96.4	84.3	68.4	78.6	0.049	0	33.27	1	660.6	1717
Q9BTT0	Acidic leucine-rich nuclear phosphoprotein 32 family member E OS=Homo sapiens GN=ANP32E PE=1 SV=1	30.674	65.1	65	70	129.1	99.1	90.1	70.2	71.9	0.259	0	35.08	1	660.5	1718
B0YJ89	RIO kinase 3 (Yeast), isoform CRA_a OS=Homo sapiens GN=RIOK3 PE=2 SV=1	59.055	96.8	63.8	71.7	83.1	117.7	94.7	65.8	66.7	0.172	0	0	2	660.3	1719
Q92535	Phosphatidylinositol N-acetylglucosaminyltransferase subunit C OS=Homo sapiens GN=PIGC PE=2 SV=1	33.561	71	67.3	69.2	105	85.5	95	82.5	84.6	0.389	0	43.28	1	660.1	1720
Q9BQ95	Evolutionarily conserved signaling intermediate in Toll pathway, mitochondrial OS=Homo sapiens GN=ECSIT PE=1 SV=1	49.117	72.3	61.1	75.1	97.8	102.5	84.5	77.2	89.4	0.28	0	91.6133	3	659.9	1721
P45983-4	Isoform 4 of Mitogen-activated protein kinase 8 OS=Homo sapiens GN=MAPK8	48.057	79.2	61.8	64.5	101	97.4	87.7	79.7	87.4	0.334	0	36.27	3	658.7	1722
Q96RT1-8	Isoform 8 of Protein LAP2 OS=Homo sapiens GN=ERBB2IP	158.926	97.9	77.4	64.9	75.1	128.2	82.6	63.2	66.4	0.027	0	23.45	1	655.7	1723
P07858	Cathepsin B OS=Homo sapiens GN=CTSB PE=1 SV=3	37.797	83.5	70.7	90.8	130.9	80.2	77.8	60.2	61.2	0.292	0	39.93	2	655.3	1724
A0A0B4J1V9	Helicase, lymphoid-specific, isoform CRA_b OS=Homo sapiens GN=HELLS PE=1 SV=1	102.65	85.3	70.1	58.5	78.5	111.5	95.1	70.7	85.4	0.086	0	50.14	2	655.1	1725
Q12756-2	Isoform 2 of Kinesin-like protein KIF1A OS=Homo sapiens GN=KIF1A	202.774	78.9	66.1	76.2	95.4	102.4	81.7	75	78.9	0.112	0	104.83	5	654.6	1726
Q9NRK6	ATP-binding cassette sub-family B member 10, mitochondrial OS=Homo sapiens GN=ABCB10 PE=1 SV=2	79.098	84.7	70.8	74	102.8	99	82.5	67.6	73.2	0.216	0	78.5333	4	654.6	1727
Q86UK7	Zinc finger protein 598 OS=Homo sapiens GN=ZNF598 PE=1 SV=1	98.575	73.6	62.7	64.4	133.6	99.3	76.4	69.3	71.4	0.089	0	16.73	2	650.7	1728
Q9P275-2	Isoform 2 of Ubiquitin carboxyl-terminal hydrolase 36 OS=Homo sapiens GN=USP36	122.832	81.6	67.1	54.8	76.2	126.8	86.8	80.4	75.9	0.032	0	51.31	1	649.6	1729
I3L0E3	HCG1984214, isoform CRA_a OS=Homo sapiens GN=hCG_1984214 PE=3 SV=1	25.704	73.9	65.5	72.5	104.3	91.8	85.8	72.9	82.8	0.194	0	83.61	1	649.5	1730
P60510	Serine/threonine-protein phosphatase 4 catalytic subunit OS=Homo sapiens GN=PPP4C PE=1 SV=1	35.057	72.7	63.1	77.5	87.6	117.6	79.2	80.2	68.8	0.896	0	79	4	646.7	1731
Q14674	Separin OS=Homo sapiens GN=ESPL1 PE=1 SV=3	233.028	87.5	71.4	78.2	91.8	96.4	82.5	61.7	76.9	0.078	0	60.9933	3	646.4	1732
O14531	Dihydropyrimidinase-related protein 4 OS=Homo sapiens GN=DPYSL4 PE=1 SV=2	61.838	74	64.5	68.9	88.5	107.8	88.1	70.9	83.1	0.066	0	25.06	1	645.8	1733
Q99807	5-demethoxyubiquinone hydroxylase, mitochondrial OS=Homo sapiens GN=COQ7 PE=1 SV=3	24.262	90.4	60	59.8	83.4	106.2	83.4	64.7	97.5	0.334	0	34.28	2	645.4	1734
Q9NWR8	Calcium uniporter regulatory subunit MCUb, mitochondrial OS=Homo sapiens GN=CCDC109B PE=1 SV=2	39.057	74.1	64.2	60	82.7	95.7	100.1	80	87	0.501	0	32.13	2	643.8	1735
P19174-2	Isoform 2 of 1-phosphatidylinositol 4,5-bisphosphate phosphodiesterase gamma-1 OS=Homo sapiens GN=PLCG1	148.566	74.6	67.6	59.9	82.9	100.3	88.6	69	100.5	0.033	0	25.73	1	643.4	1736
Q659C4	La-related protein 1B OS=Homo sapiens GN=LARP1B PE=1 SV=2	105.257	86	72.3	65.2	88.7	103.7	81.6	62	83.4	0.238	0	84.1767	4	642.9	1737
P20290	Transcription factor BTF3 OS=Homo sapiens GN=BTF3 PE=1 SV=1	22.154	72.7	60.6	64.8	89.6	110.8	88.1	63.2	88.5	0.425	0	0	1	638.3	1738
Q9UEU0	Vesicle transport through interaction with t-SNAREs homolog 1B OS=Homo sapiens GN=VTI1B PE=1 SV=3	26.672	70.3	70.1	70.4	112.3	83.6	79.8	69.4	81.6	0.179	0	39.66	1	637.5	1739
D6W592	Heterogeneous nuclear ribonucleoprotein L-like OS=Homo sapiens GN=HNRPLL PE=1 SV=1	60.061	74.8	62.4	71.2	92.6	103.3	86.1	67	79.6	0.225	0	92.5	3	637	1740
P19784	Casein kinase II subunit alpha' OS=Homo sapiens GN=CSNK2A2 PE=1 SV=1	41.187	77.5	60.2	72.8	86.4	98.4	91.3	67.6	80.5	0.105	0	28.44	1	634.7	1741
Q9BVC4	Target of rapamycin complex subunit LST8 OS=Homo sapiens GN=MLST8 PE=1 SV=1	35.853	94.2	64.5	62	84	107.9	85.9	59.9	75.7	0.668	0	116.36	4	634.1	1742
Q13315	Serine-protein kinase ATM OS=Homo sapiens GN=ATM PE=1 SV=4	350.462	75.1	71.2	58.7	78	115	89	62.7	84.3	0.024	0	29.46	2	634	1743
Q9ULE6	Paladin OS=Homo sapiens GN=PALD1 PE=1 SV=3	96.693	85.7	69.9	67.2	82.3	115.9	79.2	60.6	73.1	0.087	0	49.27	2	633.9	1744
Q01518	Adenylyl cyclase-associated protein 1 OS=Homo sapiens GN=CAP1 PE=1 SV=5	51.869	79.5	68.3	72	85.9	91.8	89.4	71.1	74.8	0.072	0	27.62	1	632.8	1745
Q9UI30	Multifunctional methyltransferase subunit TRM112-like protein OS=Homo sapiens GN=TRMT112 PE=1 SV=1	14.19	78.8	61.5	65.9	86.3	90.4	85.9	69.8	91.1	0.292	0	26.93	1	629.7	1746
P42574	Caspase-3 OS=Homo sapiens GN=CASP3 PE=1 SV=2	31.587	67.6	55.6	59.7	80.2	105.1	91.6	80.6	89	0.311	0	71.22	2	629.4	1747
P41440	Folate transporter 1 OS=Homo sapiens GN=SLC19A1 PE=1 SV=3	64.827	80.8	79	66.4	88.1	95.7	85.1	66.5	67.5	0.374	0	86.24	3	629.1	1748
P26358-2	Isoform 2 of DNA (cytosine-5)-methyltransferase 1 OS=Homo sapiens GN=DNMT1	184.703	73.7	67.2	71.9	91.5	91.8	88.4	66.3	78.2	0.157	0	82.1116	6	629	1749
O95182	NADH dehydrogenase [ubiquinone] 1 alpha subcomplex subunit 7 OS=Homo sapiens GN=NDUFA7 PE=1 SV=3	12.544	70	54.8	52.4	76.9	86.7	113.5	75	97.9	0.995	0	73.41	3	627.2	1750
O95721	Synaptosomal-associated protein 29 OS=Homo sapiens GN=SNAP29 PE=1 SV=1	28.953	124.4	78.5	52.1	50.3	115.9	99.4	56	49.5	0.311	0	37.34	2	626.1	1751
P48960	CD97 antigen OS=Homo sapiens GN=CD97 PE=1 SV=4	91.809	67.3	65.9	67.1	96.7	92	79.8	68.3	87.5	0.125	0	48.51	2	624.6	1752
O75348	V-type proton ATPase subunit G 1 OS=Homo sapiens GN=ATP6V1G1 PE=1 SV=3	13.749	72.2	68.7	73.9	105.5	76.2	74.5	73	80.1	1.154	0	51.13	2	624.1	1753
O95248-4	Isoform 4 of Myotubularin-related protein 5 OS=Homo sapiens GN=SBF1	210.916	80	62.4	70.8	75.8	108.9	88.5	64.6	72.6	0.044	0	20.76	2	623.6	1754
Q9UHC7	E3 ubiquitin-protein ligase makorin-1 OS=Homo sapiens GN=MKRN1 PE=1 SV=3	53.315	68.2	54.4	69.5	73.3	119.7	85.2	70.3	83	0.093	0	13.85	1	623.6	1755
Q96EL2	28S ribosomal protein S24, mitochondrial OS=Homo sapiens GN=MRPS24 PE=1 SV=1	19.003	68.1	61.7	67.8	93.7	102.8	79.4	71	77.3	0.212	0	38.28	1	621.8	1756
Q00059	Transcription factor A, mitochondrial OS=Homo sapiens GN=TFAM PE=1 SV=1	29.078	91.8	65	60.6	87.3	113.1	76.6	59.5	65.8	0.413	0	52.2267	3	619.7	1757
Q04837	Single-stranded DNA-binding protein, mitochondrial OS=Homo sapiens GN=SSBP1 PE=1 SV=1	17.249	81.3	58	61.4	87.8	110.4	86.3	66.9	67	0.233	0	40.91	1	619.1	1758
B7Z9C2	Nucleosome assembly protein 1-like 1 OS=Homo sapiens GN=NAP1L1 PE=1 SV=1	40.487	74.3	60.8	69.9	87.9	102.4	86.7	60.2	76.4	9	0	340.983	8	618.6	1759
Q96PE3	Type I inositol 3,4-bisphosphate 4-phosphatase OS=Homo sapiens GN=INPP4A PE=1 SV=1	109.885	58.7	53	77.2	79.7	98.3	84.4	83	82.3	0.046	0	0	1	616.6	1760
Q8TC12	Retinol dehydrogenase 11 OS=Homo sapiens GN=RDH11 PE=1 SV=2	35.363	81.5	65.9	74.3	81.7	95.4	87.8	64.4	64	0.389	0	57.92	3	615	1761
P26196	Probable ATP-dependent RNA helicase DDX6 OS=Homo sapiens GN=DDX6 PE=1 SV=2	54.382	66.6	58.8	67.5	82	93.6	83.4	73.4	89.5	0.374	0	86.4167	4	614.8	1762
Q14980	Nuclear mitotic apparatus protein 1 OS=Homo sapiens GN=NUMA1 PE=1 SV=2	238.115	69	58.6	54.4	75.6	99.7	87.2	72.9	97.2	0.016	0	22.72	1	614.6	1763
O95772	MLN64 N-terminal domain homolog OS=Homo sapiens GN=STARD3NL PE=1 SV=1	26.638	72.6	60	67.9	93.1	90	74.8	68	87.6	0.425	0	20.14	2	614	1764
O15304	Apoptosis regulatory protein Siva OS=Homo sapiens GN=SIVA1 PE=1 SV=2	18.682	69.6	58.7	76.1	82.1	84.7	81.6	74.7	85	0.585	0	26.88	2	612.5	1765
Q8WZA1-2	Isoform 2 of Protein O-linked-mannose beta-1,2-N-acetylglucosaminyltransferase 1 OS=Homo sapiens GN=POMGNT1	84.646	77.8	67.5	72.5	83.1	92	77.5	64.6	77.3	0.259	0	25.36	4	612.3	1766
Q86Y39-2	Isoform 2 of NADH dehydrogenase [ubiquinone] 1 alpha subcomplex subunit 11 OS=Homo sapiens GN=NDUFA11	23.396	74.6	66.3	69.9	90.4	89.6	86.7	58.6	72.8	0.468	0	67.11	2	608.9	1767
Q92688	Acidic leucine-rich nuclear phosphoprotein 32 family member B OS=Homo sapiens GN=ANP32B PE=1 SV=1	28.77	69.9	58.2	59.4	88.9	94	84.4	68.1	84.2	0.233	0	32.27	1	607.1	1768
A0A0A0MR51	Fatty acid desaturase 1 OS=Homo sapiens GN=FADS1 PE=1 SV=1	57.849	73.4	59.8	68.7	77.8	102	90	58.2	74.7	0.179	0	46.78	2	604.6	1769
Q6ZWT7	Lysophospholipid acyltransferase 2 OS=Homo sapiens GN=MBOAT2 PE=2 SV=2	59.488	62.8	80.1	72.1	77.2	74.6	84.5	71.2	81.2	0.369	0	70.35	3	603.7	1770
Q8NBP0	Tetratricopeptide repeat protein 13 OS=Homo sapiens GN=TTC13 PE=2 SV=3	96.751	75.4	57	71.8	80.8	95	81.5	66.2	74.8	0.182	0	24.7967	4	602.5	1771
Q17RN3	Protein FAM98C OS=Homo sapiens GN=FAM98C PE=2 SV=1	37.305	81.6	56.6	60.5	76.1	100.1	80.1	67.6	79.1	0.122	0	58.37	1	601.7	1772
Q96II5	ARAF protein OS=Homo sapiens GN=ARAF PE=1 SV=1	67.882	77	67.8	63.6	89.2	92.6	78.9	62.5	70	0.266	0	28.238	2	601.6	1773
Q6N075-2	Isoform 2 of Molybdate-anion transporter OS=Homo sapiens GN=MFSD5	61.464	71	79.2	89.9	88	70.8	78.6	59.9	64.2	0.101	0	67.81	1	601.6	1774
O75600-2	Isoform 2 of 2-amino-3-ketobutyrate coenzyme A ligase, mitochondrial OS=Homo sapiens GN=GCAT	47.944	52.5	57.9	60	87.5	89.2	68.8	76.9	108.6	0.233	0	69.9	2	601.4	1775
Q68D85	Natural cytotoxicity triggering receptor 3 ligand 1 OS=Homo sapiens GN=NCR3LG1 PE=1 SV=1	50.795	72.9	66.7	61.5	88.6	78.6	81.1	67.2	82.8	0.093	0	45.78	1	599.4	1776
P03923	NADH-ubiquinone oxidoreductase chain 6 OS=Homo sapiens GN=MT-ND6 PE=1 SV=2	18.61	63.6	70.1	62.5	73.3	76.4	89.9	78.1	83.7	3.642	0	83.33	1	597.6	1777
Q14571	Inositol 1,4,5-trisphosphate receptor type 2 OS=Homo sapiens GN=ITPR2 PE=1 SV=2	307.867	61.9	79.5	61.3	95.4	79.6	83.6	59	75.8	0.091	0	68.51	6	596.1	1778
B4E0T2	Peroxisomal targeting signal 1 receptor OS=Homo sapiens GN=PEX5 PE=1 SV=1	73.137	72	60.1	65	81.7	104.7	79.2	64.6	68.5	0.072	0	19.84	1	595.8	1779
Q9H910-3	Isoform 3 of Hematological and neurological expressed 1-like protein OS=Homo sapiens GN=HN1L	23.012	61.4	54	65.3	120.7	80.5	73.4	69.3	70.4	0.166	0	49.55	1	595	1780
Q8IVS2	Malonyl-CoA-acyl carrier protein transacylase, mitochondrial OS=Homo sapiens GN=MCAT PE=1 SV=2	42.934	79.4	61.4	57.8	75.1	97.6	87.1	59.2	75.3	0.35	0	64.99	3	592.9	1781
O60870	DNA/RNA-binding protein KIN17 OS=Homo sapiens GN=KIN PE=1 SV=2	45.345	72.8	62.2	65.9	76.2	87.7	86.8	68.3	72.5	0.08	0	0	1	592.4	1782
P17096-2	Isoform HMG-Y of High mobility group protein HMG-I/HMG-Y OS=Homo sapiens GN=HMGA1	10.673	73.6	63.9	46.7	113.4	75.8	81.6	50.3	87	5.31	0	39.0233	3	592.3	1783
E7ERK9	Translation initiation factor eIF-2B subunit delta OS=Homo sapiens GN=EIF2B4 PE=1 SV=1	59.677	56.6	51.1	80.3	107.7	91.8	73.5	63.8	66	0.389	0	83.7	4	590.8	1784
Q9ULX3	RNA-binding protein NOB1 OS=Homo sapiens GN=NOB1 PE=1 SV=1	46.646	74.6	58.8	59.4	72.1	100.4	81.1	59.9	84	0.445	0	87.88	4	590.3	1785
Q9BTE7	DCN1-like protein 5 OS=Homo sapiens GN=DCUN1D5 PE=1 SV=1	27.491	62	66.2	80.8	87.3	82.5	77	68.4	65.3	0.166	0	27.95	1	589.5	1786
Q9NRC1	Suppressor of tumorigenicity 7 protein OS=Homo sapiens GN=ST7 PE=1 SV=1	67.123	69.1	58.2	69.3	88.8	92	79.2	60.3	72	0.233	0	28.24	3	588.9	1787
Q9Y5K6	CD2-associated protein OS=Homo sapiens GN=CD2AP PE=1 SV=1	71.407	60.8	58.8	68.6	88.9	77.5	81.6	64.7	87.2	0.369	0	80.07	6	588.1	1788
Q8TBF4	Zinc finger CCHC-type and RNA-binding motif-containing protein 1 OS=Homo sapiens GN=ZCRB1 PE=1 SV=2	24.576	76.2	65.4	56.4	65	96.7	82.9	65.1	79.2	0.468	0	20.78	2	586.9	1789
Q13283	Ras GTPase-activating protein-binding protein 1 OS=Homo sapiens GN=G3BP1 PE=1 SV=1	52.132	79.9	53.1	59.9	65.9	109.9	86	56.7	73.8	0.334	0	71.8033	3	585.2	1790
Q9H553	Alpha-1,3/1,6-mannosyltransferase ALG2 OS=Homo sapiens GN=ALG2 PE=1 SV=1	47.061	69.9	52.8	64.6	85.6	96.1	86.2	68.9	60.8	0.259	0	14.48	2	584.9	1791
Q9NR31	GTP-binding protein SAR1a OS=Homo sapiens GN=SAR1A PE=1 SV=1	22.353	67.5	53.3	58.5	79.3	95	87.2	63.1	80.2	0.468	0	41.14	2	584.1	1792
H0YBH7	Store-operated calcium entry-associated regulatory factor (Fragment) OS=Homo sapiens GN=SARAF PE=1 SV=1	37.854	76.7	65.1	64.5	87.2	88.7	78.2	56.5	66.7	0.334	0	0	2	583.6	1793
Q9H920	RING finger protein 121 OS=Homo sapiens GN=RNF121 PE=1 SV=1	37.857	62.7	68.5	82.1	84.6	52.8	63.2	52.9	116.8	0.334	0	53.98	2	583.6	1794
P60903	Protein S100-A10 OS=Homo sapiens GN=S100A10 PE=1 SV=2	11.196	46.4	46.2	86.9	125.4	52.4	57.1	86.5	81.7	2.981	0	27.3033	3	582.6	1795
Q5VT25-6	Isoform 6 of Serine/threonine-protein kinase MRCK alpha OS=Homo sapiens GN=CDC42BPA	202.684	67.2	56	60.5	78.7	102.7	82.3	59.5	74.4	0.023	0	37.98	1	581.3	1796
J3QLM1	StAR-related lipid transfer protein 3 OS=Homo sapiens GN=STARD3 PE=1 SV=1	52.508	66.3	59	67.3	68.7	96.6	78.3	61.8	82.5	0.083	0	57.26	1	580.5	1797
Q06265-2	Isoform 2 of Exosome complex component RRP45 OS=Homo sapiens GN=EXOSC9	50.771	76.4	51.6	57.7	65.5	114.7	82.4	61.1	69.6	0.438	0	55.92	3	579	1798
Q15418-2	Isoform 2 of Ribosomal protein S6 kinase alpha-1 OS=Homo sapiens GN=RPS6KA1	83.88	69	52.6	63.9	80.2	101.9	78.7	58	70.3	0.103	0	0	2	574.6	1799
Q9UBU9	Nuclear RNA export factor 1 OS=Homo sapiens GN=NXF1 PE=1 SV=1	70.139	58.6	54.5	59.7	88.6	81.8	75.8	74.6	77.9	0.212	0	61.3767	3	571.5	1800
Q9NVH1	DnaJ homolog subfamily C member 11 OS=Homo sapiens GN=DNAJC11 PE=1 SV=2	63.239	69.8	60.2	59.3	71.1	95.2	83.5	62	69.7	0.16	0	45.11	2	570.8	1801
C9J7E5	Transportin-3 OS=Homo sapiens GN=TNPO3 PE=1 SV=1	107.978	56.8	56.7	53.2	69.5	90.2	80.2	67	95.1	0.046	0	26.9	1	568.7	1802
Q93009	Ubiquitin carboxyl-terminal hydrolase 7 OS=Homo sapiens GN=USP7 PE=1 SV=2	128.22	62.4	55	64.9	82.5	82.9	80.7	69.5	70.1	0.07	0	33.48	2	568	1803
Q13444	Disintegrin and metalloproteinase domain-containing protein 15 OS=Homo sapiens GN=ADAM15 PE=1 SV=4	92.899	63.4	59.3	56.3	79.8	94.8	86.8	60.6	65.9	0.064	0	14.4	1	566.9	1804
P78382	CMP-sialic acid transporter OS=Homo sapiens GN=SLC35A1 PE=2 SV=1	36.755	67.4	60.5	64.3	72.2	82.1	82.6	62.5	73.5	0.334	0	28.3	2	565.1	1805
Q96NT0	Coiled-coil domain-containing protein 115 OS=Homo sapiens GN=CCDC115 PE=1 SV=1	19.748	63.4	58	62.2	75.6	92.1	83.8	60.2	68.9	0.874	0	61.0433	2	564.2	1806
Q9BZQ6	ER degradation-enhancing alpha-mannosidase-like protein 3 OS=Homo sapiens GN=EDEM3 PE=1 SV=2	104.598	56.3	57.6	53.5	76.3	88.4	84.3	63.6	82.2	0.047	0	28.43	1	562.2	1807
Q9NUD5	Zinc finger CCHC domain-containing protein 3 OS=Homo sapiens GN=ZCCHC3 PE=1 SV=1	43.591	70.7	57	60.3	56.6	96.3	87.4	62.4	70.1	0.28	0	80.36	3	560.8	1808
O95239	Chromosome-associated kinesin KIF4A OS=Homo sapiens GN=KIF4A PE=1 SV=3	139.794	72.2	56.5	54.8	107.6	77.4	69.8	56.3	66.1	0.062	0	20.8	2	560.7	1809
Q8N490	Probable hydrolase PNKD OS=Homo sapiens GN=PNKD PE=1 SV=2	42.849	68.9	56.9	52.1	62	111.3	82.9	53.9	70.8	0.129	0	54.96	1	558.8	1810
Q9H773	dCTP pyrophosphatase 1 OS=Homo sapiens GN=DCTPP1 PE=1 SV=1	18.669	65	52.3	58.7	91.5	90.6	73.8	63	61.5	1.848	0	88.6	4	556.4	1811
O00487	26S proteasome non-ATPase regulatory subunit 14 OS=Homo sapiens GN=PSMD14 PE=1 SV=1	34.555	73	51.6	63.7	79.9	88.5	81.4	62.1	55.6	0.292	0	44.43	2	555.8	1812
Q9BT40	Inositol polyphosphate 5-phosphatase K OS=Homo sapiens GN=INPP5K PE=1 SV=3	51.058	64.6	54.2	61.5	78.7	84.4	76.8	67.7	67.6	0.369	0	56.51	3	555.5	1813
O75439	Mitochondrial-processing peptidase subunit beta OS=Homo sapiens GN=PMPCB PE=1 SV=2	54.331	64.9	50.6	58.6	77	87.1	79.8	58.9	77.9	0.509	0	148.91	5	554.8	1814
Q9UGP4	LIM domain-containing protein 1 OS=Homo sapiens GN=LIMD1 PE=1 SV=1	72.144	70.7	58.2	56.2	77.7	79.5	74.9	62	75.2	0.064	0	25.37	1	554.4	1815
A0A087X1E4	Arfaptin-2 OS=Homo sapiens GN=ARFIP2 PE=1 SV=1	41.569	64.2	47.4	60.8	74.8	84.4	80.8	61.2	80.3	0.093	0	56.43	1	553.9	1816
A0A0A0MRR7	U1 small nuclear ribonucleoprotein C OS=Homo sapiens GN=SNRPC PE=1 SV=1	19.673	72	58.2	50.6	63.6	89.6	75.2	53.3	91.1	0.468	0	27.46	1	553.6	1817
O95433	Activator of 90 kDa heat shock protein ATPase homolog 1 OS=Homo sapiens GN=AHSA1 PE=1 SV=1	38.25	70.6	53.4	59.7	89.2	96.8	76.4	56.1	51.4	0.212	0	36.7	2	553.6	1818
Q13123	Protein Red OS=Homo sapiens GN=IK PE=1 SV=3	65.562	72.3	55.1	48.6	65.7	106.1	84.5	57.4	63.4	0.166	0	16.93	2	553.1	1819
O43148-2	Isoform 2 of mRNA cap guanine-N7 methyltransferase OS=Homo sapiens GN=RNMT	57.688	60.8	49.9	65.9	75.9	86.4	77.4	64.5	68.2	0.145	0	52.03	1	549	1820
Q9BV86	N-terminal Xaa-Pro-Lys N-methyltransferase 1 OS=Homo sapiens GN=NTMT1 PE=1 SV=3	25.371	86	51.6	49.4	57.4	97.2	83.4	52	71.1	0.468	0	57.76	2	548.1	1821
Q9H0U9	Testis-specific Y-encoded-like protein 1 OS=Homo sapiens GN=TSPYL1 PE=1 SV=3	49.162	57.2	47.6	61.1	74.4	96	78	56.8	76.9	0.089	0	107.77	1	548	1822
Q9UNS2	COP9 signalosome complex subunit 3 OS=Homo sapiens GN=COPS3 PE=1 SV=3	47.842	66.1	56.5	56.5	84.6	85.1	70.7	65.4	61.6	0.089	0	34.04	1	546.5	1823
Q96A72	Protein mago nashi homolog 2 OS=Homo sapiens GN=MAGOHB PE=1 SV=1	17.265	68.6	55.1	58.8	91.7	63.3	68.8	60.2	79.5	0.638	0	64.17	3	546	1824
Q13200	26S proteasome non-ATPase regulatory subunit 2 OS=Homo sapiens GN=PSMD2 PE=1 SV=3	100.136	59	53.6	57.6	82.3	83.1	76.4	64	69.9	0.366	0	129.287	8	545.9	1825
Q92665	28S ribosomal protein S31, mitochondrial OS=Homo sapiens GN=MRPS31 PE=1 SV=3	45.29	68.1	51.4	53.2	78	102.3	76.9	52.6	62.3	0.292	0	90.37	3	544.8	1826
P60602	Reactive oxygen species modulator 1 OS=Homo sapiens GN=ROMO1 PE=1 SV=1	8.177	68.7	51.5	60	69.6	92.5	69.9	57.6	71.4	9	0	200.57	2	541.2	1827
Q14146	Unhealthy ribosome biogenesis protein 2 homolog OS=Homo sapiens GN=URB2 PE=2 SV=2	170.435	67.4	63.4	47.3	66.5	98.9	65.3	47.7	83	0.059	0	36.8	2	539.5	1828
Q96HD1-2	Isoform 2 of Cysteine-rich with EGF-like domain protein 1 OS=Homo sapiens GN=CRELD1	45.911	64.5	56.4	58	81.3	74.1	74.4	54.5	75.9	0.096	0	35.5	1	539.1	1829
P19525	Interferon-induced, double-stranded RNA-activated protein kinase OS=Homo sapiens GN=EIF2AK2 PE=1 SV=2	62.056	55.9	50	57.3	66.9	90.9	79.5	64	74.5	0.093	0	42.23	1	539	1830
Q69YL0	Uncharacterized protein NCBP2-AS2 OS=Homo sapiens GN=NCBP2-AS2 PE=1 SV=1	10.884	66.9	45.8	54.4	76	94.3	74	59.3	67.4	1.371	0	59.2633	2	538.1	1831
Q7Z2K6	Endoplasmic reticulum metallopeptidase 1 OS=Homo sapiens GN=ERMP1 PE=1 SV=2	100.167	55.8	60.4	55.6	73.1	93.6	69.4	60.4	69.5	0.252	0	42.63	4	537.8	1832
G3V3A4	SNW domain-containing protein 1 OS=Homo sapiens GN=SNW1 PE=1 SV=1	65.351	66.1	55	47.8	82.5	82.7	74.3	60.4	67.5	0.141	0	39.29	2	536.3	1833
Q31612	HLA class I histocompatibility antigen, B-73 alpha chain OS=Homo sapiens GN=HLA-B PE=1 SV=1	40.41	63	50.2	62.8	72.6	87.9	78.1	54.2	67.5	1.154	0	236.232	6	536.3	1834
Q9P2R7	Succinyl-CoA ligase [ADP-forming] subunit beta, mitochondrial OS=Homo sapiens GN=SUCLA2 PE=1 SV=3	50.285	75.9	60.2	45.9	62	103.4	79.1	51.9	55.6	0.083	0	50.31	1	534	1835
B3KNC3	cDNA FLJ14222 fis, clone NT2RP3003992, highly similar to Nucleolar complex protein 2 homolog OS=Homo sapiens PE=2 SV=1	84.864	61.8	55.4	56.2	64.5	81.8	70.9	62.9	78.4	0.468	0	59.43	6	531.9	1836
O43681	ATPase ASNA1 OS=Homo sapiens GN=ASNA1 PE=1 SV=2	38.767	57.1	53.8	55.5	75.7	79.6	74	60.9	74.4	0.968	0	48.96	5	531	1837
O95197	Reticulon-3 OS=Homo sapiens GN=RTN3 PE=1 SV=2	112.541	59.4	53.2	56.3	80.1	71.8	75.1	65.4	66.6	0.142	0	34.3	2	527.9	1838
P45985-2	Isoform 2 of Dual specificity mitogen-activated protein kinase kinase 4 OS=Homo sapiens GN=MAP2K4	45.555	68.5	52.7	58.9	82.9	74.3	65.1	54.6	69.5	0.089	0	36.92	1	526.5	1839
Q9BY67-3	Isoform 3 of Cell adhesion molecule 1 OS=Homo sapiens GN=CADM1	51.501	66	57.5	80.6	93.7	64.8	57	49.3	57	0.222	0	67.28	1	525.9	1840
P78381-4	Isoform 4 of UDP-galactose translocator OS=Homo sapiens GN=SLC35A2	44.078	62	61.8	57.9	74.9	75.5	72.5	58.7	61.7	0.145	0	36.94	1	525	1841
O75607	Nucleoplasmin-3 OS=Homo sapiens GN=NPM3 PE=1 SV=3	19.331	54.8	55	53.9	72.3	83.6	73	52.2	78.4	0.668	0	51.3	2	523.2	1842
Q9NVV4	Poly(A) RNA polymerase, mitochondrial OS=Homo sapiens GN=MTPAP PE=1 SV=1	66.13	68.6	53.6	59.2	79.2	83.8	63.2	56.4	59.1	0.645	0	119.937	7	523.1	1843
Q8NI27	THO complex subunit 2 OS=Homo sapiens GN=THOC2 PE=1 SV=2	182.659	56.3	52.3	57.7	78.1	76.3	81.1	58.8	62.2	0.109	0	39.1	4	522.8	1844
Q96ER9	Coiled-coil domain-containing protein 51 OS=Homo sapiens GN=CCDC51 PE=1 SV=2	45.783	60.1	49.9	57.6	79.7	83.2	64.2	60.1	65.7	0.083	0	18.33	1	520.5	1845
Q8NCS4	Uncharacterized protein ZMYM6NB OS=Homo sapiens GN=ZMYM6NB PE=1 SV=1	16.873	66.2	59.4	72.2	74.9	69.6	66.7	53.5	57.6	0.389	0	40.21	1	520.1	1846
Q9H9S5	Fukutin-related protein OS=Homo sapiens GN=FKRP PE=1 SV=1	54.533	54.5	50.5	54.8	67.1	71	69.7	59	92.7	0.374	0	55.06	3	519.3	1847
O75534-4	Isoform 4 of Cold shock domain-containing protein E1 OS=Homo sapiens GN=CSDE1	93.683	64.1	55.4	59.8	78.3	78	61.3	54.8	65.8	0.126	0	49.52	3	517.5	1848
Q9UJY4	ADP-ribosylation factor-binding protein GGA2 OS=Homo sapiens GN=GGA2 PE=1 SV=3	67.108	58.3	48.2	61.5	74.3	90.5	69.8	54.8	58.4	0.08	0	27.44	1	515.8	1849
Q9BWH2	FUN14 domain-containing protein 2 OS=Homo sapiens GN=FUNDC2 PE=1 SV=2	20.663	65.7	55.2	39.5	43.1	111.2	76.2	57.7	66.9	0.259	0	60.03	1	515.5	1850
Q96HA1	Nuclear envelope pore membrane protein POM 121 OS=Homo sapiens GN=POM121 PE=1 SV=2	127.642	59.4	52.1	49.2	74.3	71.2	82.4	47.1	79.2	0.058	0	33.95	1	514.9	1851
A0A0A0MSV9	Tapasin OS=Homo sapiens GN=TAPBP PE=1 SV=1	53.854	62.4	53.8	53.8	63.4	68.2	80.7	56.8	74.6	0.292	0	48.19	2	513.7	1852
P52298	Nuclear cap-binding protein subunit 2 OS=Homo sapiens GN=NCBP2 PE=1 SV=1	17.99	67.2	50.4	42.7	60.9	91.6	81.9	52.9	66.1	0.233	0	34.39	1	513.7	1853
Q9Y375	Complex I intermediate-associated protein 30, mitochondrial OS=Homo sapiens GN=NDUFAF1 PE=1 SV=2	37.74	50.1	47.3	54.4	56.9	77.3	82.2	64.9	79.6	0.222	0	0	2	512.7	1854
G3V5Z7	Proteasome subunit alpha type OS=Homo sapiens GN=PSMA6 PE=1 SV=1	28.129	57.9	49.2	64.4	72.6	67.4	62	52.2	85.5	0.359	0	17.59	2	511.2	1855
Q4KMP7	TBC1 domain family member 10B OS=Homo sapiens GN=TBC1D10B PE=1 SV=3	87.145	62.9	51.5	55.7	73.2	83.4	78.2	47.1	59.1	0.072	0	0	1	511.1	1856
Q7Z7B1	Phosphatidylinositol-glycan biosynthesis class W protein OS=Homo sapiens GN=PIGW PE=1 SV=1	56.845	57.5	52.6	60.5	70.4	72.2	71.6	61.4	64.8	0.259	0	0	2	511	1857
Q9NWT8	Aurora kinase A-interacting protein OS=Homo sapiens GN=AURKAIP1 PE=1 SV=1	22.34	80	48.2	45.8	54.5	110.2	75.2	50	45.9	0.334	0	37.11	1	509.8	1858
Q15773	Myeloid leukemia factor 2 OS=Homo sapiens GN=MLF2 PE=1 SV=1	28.129	60.7	49.5	54.2	63.4	105.9	72	54.4	46.6	0.468	0	81.29	2	506.7	1859
Q86UL3	Glycerol-3-phosphate acyltransferase 4 OS=Homo sapiens GN=GPAT4 PE=1 SV=1	52.037	62.7	57.9	60.3	66.5	80.1	74.8	46.2	58.1	0.778	0	87.4925	6	506.6	1860
Q00536-2	Isoform 2 of Cyclin-dependent kinase 16 OS=Homo sapiens GN=CDK16	63.418	62.5	52.3	51.8	63.7	94.6	61.3	48.8	67.9	0.133	0	67.65	2	502.9	1861
Q9NSP4	Centromere protein M OS=Homo sapiens GN=CENPM PE=1 SV=1	19.724	58.3	48.8	53.3	68.9	66.2	70.1	60.9	76	0.194	0	29.17	1	502.5	1862
A0A0A0MQS1	Pyrroline-5-carboxylate reductase OS=Homo sapiens GN=PYCRL PE=1 SV=1	29.874	56.3	56.3	47.6	52.5	96.9	67.3	58.7	65	0.389	0	99.89	2	500.6	1863
P49770	Translation initiation factor eIF-2B subunit beta OS=Homo sapiens GN=EIF2B2 PE=1 SV=3	38.965	57.5	45.2	59.2	82.8	76.8	62.6	53.4	63	0.122	0	64.88	1	500.5	1864
H0YB26	Copine-3 (Fragment) OS=Homo sapiens GN=CPNE3 PE=1 SV=1	29.426	61.7	46.2	50.9	61.9	68.5	52	55.7	103.1	4.878	0	235.653	8	500	1865
O60488	Long-chain-fatty-acid--CoA ligase 4 OS=Homo sapiens GN=ACSL4 PE=1 SV=2	79.137	52.7	41.1	53.3	76.2	81.4	69.9	53.7	70.4	0.413	0	207.86	5	498.7	1866
Q5T4U5	Acyl-Coenzyme A dehydrogenase, C-4 to C-12 straight chain, isoform CRA_a OS=Homo sapiens GN=ACADM PE=1 SV=1	50.238	58.5	50.5	53.3	62.8	89.2	70.2	51.9	60.8	0.11	0	24.12	1	497.2	1867
Q5RKV6	Exosome complex component MTR3 OS=Homo sapiens GN=EXOSC6 PE=1 SV=1	28.218	56.6	52.1	53.7	73.9	74.2	70.4	46.7	69.5	0.334	0	71.73	2	497.1	1868
P05091	Aldehyde dehydrogenase, mitochondrial OS=Homo sapiens GN=ALDH2 PE=1 SV=2	56.346	66.3	43.1	65.9	65.8	75.9	67.1	49	63.8	0.179	0	0	2	496.9	1869
Q9Y2P8	RNA 3'-terminal phosphate cyclase-like protein OS=Homo sapiens GN=RCL1 PE=1 SV=3	40.817	83.1	55.8	38	57.8	86.1	72.8	45.1	57.4	0.212	0	57.68	2	496.1	1870
Q9P2X0-2	Isoform 2 of Dolichol-phosphate mannosyltransferase subunit 3 OS=Homo sapiens GN=DPM3	13.268	52.6	50.6	59.8	77.2	81.4	69.4	53.9	51	0.585	0	31.3	1	495.9	1871
O75818	Ribonuclease P protein subunit p40 OS=Homo sapiens GN=RPP40 PE=1 SV=3	41.807	57	47	50.9	76.6	89.7	64.5	52.2	57.3	0.11	0	33.55	1	495.2	1872
Q9Y448	Small kinetochore-associated protein OS=Homo sapiens GN=KNSTRN PE=1 SV=2	35.416	56	46.5	49	77	79.6	62.2	58.1	65.5	0.101	0	63.15	1	493.9	1873
Q96RG2-2	Isoform 2 of PAS domain-containing serine/threonine-protein kinase OS=Homo sapiens GN=PASK	143.593	67.1	50	58.6	61.3	78.6	72.3	48.2	56.4	0.038	0	54.23	1	492.5	1874
Q5VT66-2	Isoform 2 of Mitochondrial amidoxime-reducing component 1 OS=Homo sapiens GN=MARC1	39.428	65.3	52.1	47.5	62.4	77.2	66.2	53.6	64.1	0.551	0	79.8867	4	488.4	1875
Q96CW5	Gamma-tubulin complex component 3 OS=Homo sapiens GN=TUBGCP3 PE=1 SV=2	103.506	58.8	44.8	53	55.7	90.7	70.6	46.2	64.6	0.091	0	52.84	2	484.4	1876
P04920	Anion exchange protein 2 OS=Homo sapiens GN=SLC4A2 PE=1 SV=4	136.923	52.9	49	59.3	74.3	59.9	65.8	58.9	63.4	0.078	0	60.74	2	483.5	1877
P18669	Phosphoglycerate mutase 1 OS=Homo sapiens GN=PGAM1 PE=1 SV=2	28.786	48.4	42.7	53.3	80.9	82.1	68.3	43.8	62.4	0.359	0	78.11	2	481.9	1878
P06400	Retinoblastoma-associated protein OS=Homo sapiens GN=RB1 PE=1 SV=2	106.092	57.3	55.3	54	74.5	74	64.7	48	53.2	0.043	0	35.61	1	481	1879
Q9HCK1	DBF4-type zinc finger-containing protein 2 OS=Homo sapiens GN=ZDBF2 PE=1 SV=3	265.453	68.5	49.8	49.2	56.7	79.7	69.1	49.8	55.1	0.055	0	27.07	3	477.9	1880
Q9Y314	Nitric oxide synthase-interacting protein OS=Homo sapiens GN=NOSIP PE=1 SV=1	33.151	54.4	51.3	51.6	71.5	70.5	63.4	47.5	64.5	0.668	0	119.15	4	474.7	1881
P46063	ATP-dependent DNA helicase Q1 OS=Homo sapiens GN=RECQL PE=1 SV=3	73.41	55.8	43.9	48.3	71.5	65.7	60.9	56.1	71.8	0.343	0	112.23	5	474	1882
A0A0C4DGV4	Hepatitis B virus x interacting protein OS=Homo sapiens GN=LAMTOR5 PE=1 SV=1	18.147	56.1	52.7	48.9	62	78.3	64.6	45.6	65.2	0.259	0	38.47	1	473.4	1883
Q9UET6	Putative tRNA (cytidine(32)/guanosine(34)-2'-O)-methyltransferase OS=Homo sapiens GN=FTSJ1 PE=1 SV=2	36.056	75.6	50.1	53.5	62.7	72.9	60	46	51.9	1.154	0	96.2	4	472.7	1884
F5GY05	Constitutive coactivator of peroxisome proliferator-activated receptor gamma OS=Homo sapiens GN=FAM120B PE=1 SV=1	106.048	49	49.5	47	68.5	67.1	66.3	57.2	66.1	0.126	0	23	3	470.7	1885
Q13409	Cytoplasmic dynein 1 intermediate chain 2 OS=Homo sapiens GN=DYNC1I2 PE=1 SV=3	71.412	58.4	44.3	44.4	53.5	90.3	70.3	48.4	59.8	0.389	0	84.8	3	469.4	1886
E9PB61	THO complex subunit 4 OS=Homo sapiens GN=ALYREF PE=1 SV=1	27.541	67	42.1	30.4	72.2	82.4	63.7	45.1	64.5	1.054	0	143.03	3	467.4	1887
Q15459	Splicing factor 3A subunit 1 OS=Homo sapiens GN=SF3A1 PE=1 SV=1	88.831	51.8	44.9	50.3	72.1	69.2	54.5	57.3	66.4	0.056	0	47.22	1	466.5	1888
Q06481	Amyloid-like protein 2 OS=Homo sapiens GN=APLP2 PE=1 SV=2	86.9	55.2	51.1	56.8	72.2	72.8	69.5	42.2	45.3	0.051	0	34.64	1	465.1	1889
Q8N543	Prolyl 3-hydroxylase OGFOD1 OS=Homo sapiens GN=OGFOD1 PE=1 SV=1	63.206	52.5	46.8	55.2	70.4	73.1	68.8	48.8	49.2	0.186	0	48.84	2	464.8	1890
Q8TCT6	Signal peptide peptidase-like 3 OS=Homo sapiens GN=SPPL3 PE=1 SV=1	42.535	64.7	57.4	64.7	67	72.7	57.9	40.6	39.8	0.179	0	24.65	1	464.8	1891
Q8N999	Uncharacterized protein C12orf29 OS=Homo sapiens GN=C12orf29 PE=1 SV=2	37.466	59	40.2	55.9	68.2	68.6	58.5	51.4	62.8	0.245	0	32.92	2	464.6	1892
Q9Y2J2	Band 4.1-like protein 3 OS=Homo sapiens GN=EPB41L3 PE=1 SV=2	120.603	63.5	50.4	40.4	48.9	99.6	68	41.3	50.9	0.077	0	22.39	2	463	1893
P10909-2	Isoform 2 of Clusterin OS=Homo sapiens GN=CLU	57.796	62.5	41.6	47.6	65.8	74.2	63.2	49.3	56.9	0.292	0	54.05	3	461.1	1894
Q5SU54	HLA class II histocompatibility antigen, DQ beta 1 chain OS=Homo sapiens GN=HLA-DQB1 PE=1 SV=1	30.474	56	47.6	49	71.6	58.8	59.9	50.6	66	0.311	0	25.22	2	459.5	1895
Q9H0H5	Rac GTPase-activating protein 1 OS=Homo sapiens GN=RACGAP1 PE=1 SV=1	70.982	70.5	46.4	38	58.7	75.3	59.2	41.7	68.6	0.125	0	26.52	2	458.4	1896
Q86T03-2	Isoform 2 of Type 1 phosphatidylinositol 4,5-bisphosphate 4-phosphatase OS=Homo sapiens GN=TMEM55B	30.165	41.5	49.4	47.5	62.5	75.7	60	57	62.9	0.719	0	35.9657	3	456.5	1897
P46379-3	Isoform 3 of Large proline-rich protein BAG6 OS=Homo sapiens GN=BAG6	122.265	52.6	39.1	48.8	60.1	79.5	64.1	50.6	59.9	0.179	0	48.99	3	454.7	1898
Q06136	3-ketodihydrosphingosine reductase OS=Homo sapiens GN=KDSR PE=1 SV=1	36.164	46.5	45	52.6	62.5	63.3	63.6	57.8	60.7	0.155	0	33.79	1	452	1899
Q12933-2	Isoform 2 of TNF receptor-associated factor 2 OS=Homo sapiens GN=TRAF2	61.343	49.1	44.8	47.6	85.6	65.7	64.1	45.5	49	0.066	0	38.28	1	451.4	1900
Q13206	Probable ATP-dependent RNA helicase DDX10 OS=Homo sapiens GN=DDX10 PE=1 SV=2	100.825	53.2	44.1	46.6	54.9	92.2	61.3	45.1	53.7	0.096	0	25.82	2	451.1	1901
Q8IYS1	Peptidase M20 domain-containing protein 2 OS=Homo sapiens GN=PM20D2 PE=1 SV=2	47.746	47	48.7	46.8	70.4	64.5	54.7	46.4	69.6	0.35	0	77.33	3	448.1	1902
Q9Y487	V-type proton ATPase 116 kDa subunit a isoform 2 OS=Homo sapiens GN=ATP6V0A2 PE=1 SV=2	98.018	45.1	43.6	46	66.5	61.1	68.5	62.7	53.9	0.253	0	71.27	5	447.4	1903
Q9Y512	Sorting and assembly machinery component 50 homolog OS=Homo sapiens GN=SAMM50 PE=1 SV=3	51.943	49.5	47	48.3	66	69.1	61	46.3	60	0.155	0	13.71	2	447.2	1904
Q9UFG5-2	Isoform 2 of UPF0449 protein C19orf25 OS=Homo sapiens GN=C19orf25	17.204	41.6	35.1	60.7	72.1	62.4	68.9	56.4	49.3	0.334	0	31.74	1	446.5	1905
Q86Y07	Serine/threonine-protein kinase VRK2 OS=Homo sapiens GN=VRK2 PE=1 SV=3	58.104	48.9	48.9	45.4	55.5	68.5	62.5	53.9	62.1	0.08	0	15.38	1	445.7	1906
Q16543	Hsp90 co-chaperone Cdc37 OS=Homo sapiens GN=CDC37 PE=1 SV=1	44.44	41.9	38.6	51.7	72.8	66.9	60.7	47.3	64.2	0.274	0	53.65	2	444.1	1907
Q15654	Thyroid receptor-interacting protein 6 OS=Homo sapiens GN=TRIP6 PE=1 SV=3	50.255	48.8	43.9	56.6	59.7	65.8	64.1	47.9	57.1	0.28	0	73.2933	3	443.9	1908
Q8NFJ5	Retinoic acid-induced protein 3 OS=Homo sapiens GN=GPRC5A PE=1 SV=2	40.225	41.9	35.9	53.5	69.2	56.4	67	52.7	66.1	0.166	0	0	1	442.7	1909
Q4G0I0	Protein CCSMST1 OS=Homo sapiens GN=CCSMST1 PE=2 SV=1	14.994	49.1	44.1	45.3	65.3	58.6	59	46.1	74	0.259	0	28.46	1	441.5	1910
Q15631	Translin OS=Homo sapiens GN=TSN PE=1 SV=1	26.167	61.7	50.1	43.8	60.3	66.5	60.9	45.4	50.2	0.701	0	50.76	3	438.9	1911
Q13443	Disintegrin and metalloproteinase domain-containing protein 9 OS=Homo sapiens GN=ADAM9 PE=1 SV=1	90.497	51.2	48.1	58.3	66.3	64.5	55.1	41.5	51.9	0.047	0	14.24	1	436.9	1912
P27694	Replication protein A 70 kDa DNA-binding subunit OS=Homo sapiens GN=RPA1 PE=1 SV=2	68.095	49.8	40.5	50.3	68	61	56.8	48.6	60.1	0.064	0	40.04	1	435.1	1913
O14641	Segment polarity protein dishevelled homolog DVL-2 OS=Homo sapiens GN=DVL2 PE=1 SV=1	78.899	53.2	39.6	51.8	50.1	85.3	63.2	42.7	47.7	0.066	0	22.49	1	433.6	1914
Q04941	Proteolipid protein 2 OS=Homo sapiens GN=PLP2 PE=1 SV=1	16.68	45.5	46.8	56.8	78.2	43.7	56.8	44.4	59.5	1.154	0	72.34	2	431.7	1915
Q8N4A0	Polypeptide N-acetylgalactosaminyltransferase 4 OS=Homo sapiens GN=GALNT4 PE=1 SV=2	66.624	44.4	36.2	45.6	60.4	66.8	58.3	52.4	67.2	0.225	0	66.06	3	431.3	1916
Q66K74	Microtubule-associated protein 1S OS=Homo sapiens GN=MAP1S PE=1 SV=2	112.142	51.9	39.8	45.4	61.4	70.8	56.3	49.3	54	0.212	0	40.87	4	428.9	1917
Q9HB71	Calcyclin-binding protein OS=Homo sapiens GN=CACYBP PE=1 SV=2	26.194	41	37.1	47.1	77	60.9	54.2	53.1	58	0.931	0	50.97	3	428.4	1918
E7EP87	Nuclear prelamin A recognition factor OS=Homo sapiens GN=NARF PE=1 SV=2	56.038	42.6	42.3	49.3	57.5	68.9	59	48.7	59.1	0.077	0	38.82	1	427.4	1919
Q9NY27	Serine/threonine-protein phosphatase 4 regulatory subunit 2 OS=Homo sapiens GN=PPP4R2 PE=1 SV=3	46.869	49.8	43.6	47.3	67.7	67	51.9	46	53.5	0.096	0	28.22	1	426.8	1920
Q9Y5Y5-2	Isoform 2 of Peroxisomal membrane protein PEX16 OS=Homo sapiens GN=PEX16	39.245	49.5	40.2	43.2	62.7	68	54.6	50.8	56.6	0.129	0	46.46	1	425.6	1921
Q13625-3	Isoform 3 of Apoptosis-stimulating of p53 protein 2 OS=Homo sapiens GN=TP53BP2	126.245	47.8	43.2	48.4	56.8	71.2	55.5	44.9	57.6	0.041	0	27.22	1	425.4	1922
P82932	28S ribosomal protein S6, mitochondrial OS=Homo sapiens GN=MRPS6 PE=1 SV=3	14.218	57	43.4	43.8	52.8	82.1	58.3	42.7	44	1.154	0	64.1467	2	424.1	1923
A5YKK6	CCR4-NOT transcription complex subunit 1 OS=Homo sapiens GN=CNOT1 PE=1 SV=2	266.768	47.3	34.5	50	58.1	75.5	58.8	51	48.3	0.05	0	28.54	3	423.5	1924
Q8NC56	LEM domain-containing protein 2 OS=Homo sapiens GN=LEMD2 PE=1 SV=1	56.94	47	43.3	42.7	55.9	62.3	66.1	47.5	57.8	0.63	0	88.15	7	422.6	1925
O15162	Phospholipid scramblase 1 OS=Homo sapiens GN=PLSCR1 PE=1 SV=1	35.026	50.5	53	56.8	43.3	63.4	56.4	39.4	58.5	0.233	0	38.02	1	421.3	1926
B3KSH1	Eukaryotic translation initiation factor 3 subunit F OS=Homo sapiens GN=EIF3F PE=2 SV=1	39.122	61	38.2	42.5	50.3	82	58	40	46.3	0.896	0	46.69	5	418.3	1927
A0A0C4DH75	MAGUK p55 subfamily member 2 OS=Homo sapiens GN=MPP2 PE=1 SV=1	66.765	43	45.8	49	58.4	62.3	63	42.7	52.7	0.133	0	51.34	2	416.9	1928
A0A087X0I6	Serine/threonine-protein kinase MARK1 OS=Homo sapiens GN=MARK1 PE=1 SV=1	89.034	51.4	39	45	53.8	75.1	56.1	42.5	53.2	0.155	1	57.1	3	416.1	1929
Q9BTX3	Transmembrane protein 208 OS=Homo sapiens GN=TMEM208 PE=1 SV=1	19.629	45.9	44.8	46.8	60.2	62.7	60.4	43.3	52	2.162	0	34.57	2	416.1	1930
A0A087WYN9	ATP-dependent RNA helicase DHX29 OS=Homo sapiens GN=DHX29 PE=1 SV=1	155.195	58.8	34.6	44.4	49	75	63.9	38.5	51	0.027	0	57.02	1	415.2	1931
O75533	Splicing factor 3B subunit 1 OS=Homo sapiens GN=SF3B1 PE=1 SV=3	145.738	51.5	45.7	40.2	61.6	63.1	51.9	47.2	52.3	0.212	0	75.28	6	413.5	1932
A0A0A6YY92	Adenylosuccinate lyase OS=Homo sapiens GN=ADSL PE=1 SV=1	56.181	49.1	40	49.8	65.4	52.8	55.2	46.1	54.9	0.075	0	62.75	1	413.3	1933
P57740	Nuclear pore complex protein Nup107 OS=Homo sapiens GN=NUP107 PE=1 SV=1	106.307	53.7	43.4	43.2	55.2	76.2	56.4	43.6	41.2	0.172	0	56.43	4	412.9	1934
Q99470	Stromal cell-derived factor 2 OS=Homo sapiens GN=SDF2 PE=1 SV=2	23.011	48.1	39.6	42	51.4	77.5	52.3	42.1	59.6	0.52	0	87.15	2	412.6	1935
O43290	U4/U6.U5 tri-snRNP-associated protein 1 OS=Homo sapiens GN=SART1 PE=1 SV=1	90.2	53.3	46.2	34.7	42.9	85.6	63.6	42	42.9	0.11	0	33.66	2	411.2	1936
P35754	Glutaredoxin-1 OS=Homo sapiens GN=GLRX PE=1 SV=2	11.768	39.4	40.5	42.8	58.2	64.6	51.3	61.1	49.6	0.468	0	77.03	1	407.5	1937
P54105	Methylosome subunit pICln OS=Homo sapiens GN=CLNS1A PE=1 SV=1	26.199	41.3	38.1	49.4	65.7	57.3	54.7	44	56.6	0.52	0	106.89	2	407.1	1938
Q9NRZ7-3	Isoform 3 of 1-acyl-sn-glycerol-3-phosphate acyltransferase gamma OS=Homo sapiens GN=AGPAT3	45.484	57.4	51.9	44	53.3	56.6	58.3	39.1	46	0.105	0	40.41	1	406.6	1939
Q9NSI2	Protein FAM207A OS=Homo sapiens GN=FAM207A PE=1 SV=2	25.441	55.2	43.6	41.9	55.5	60.1	51.3	42.3	55.1	0.145	0	0	1	405	1940
Q9Y2U9	Kelch domain-containing protein 2 OS=Homo sapiens GN=KLHDC2 PE=1 SV=1	46.069	41.6	43	46.3	55.1	59.4	57.8	48.9	52.2	0.089	0	22.51	1	404.3	1941
O75794	Cell division cycle protein 123 homolog OS=Homo sapiens GN=CDC123 PE=1 SV=1	39.11	44.4	46.9	41.2	47.4	65.5	65.8	51.1	40.5	0.129	0	38.04	1	402.8	1942
O00505	Importin subunit alpha-4 OS=Homo sapiens GN=KPNA3 PE=1 SV=2	57.775	59	39.8	36.9	49.7	66.3	64	38.4	47.5	0.222	0	13.58	1	401.6	1943
P52888	Thimet oligopeptidase OS=Homo sapiens GN=THOP1 PE=1 SV=2	78.789	50.2	44.9	36	45.9	68.1	54.2	45.1	57	0.324	0	67.15	5	401.4	1944
M0QZM1	Heterogeneous nuclear ribonucleoprotein M (Fragment) OS=Homo sapiens GN=HNRNPM PE=1 SV=1	40.016	76.8	39.1	34	42.9	75.7	45.2	41.5	44.7	19.535	0	1531.97	23	399.9	1945
Q13454	Tumor suppressor candidate 3 OS=Homo sapiens GN=TUSC3 PE=1 SV=1	39.65	40.6	43.9	66.2	51	53.8	55.2	47.9	41.1	0.292	0	78.01	2	399.7	1946
Q9Y2W1	Thyroid hormone receptor-associated protein 3 OS=Homo sapiens GN=THRAP3 PE=1 SV=2	108.601	57	54.1	51.1	61.8	40.2	52.2	45.3	37.6	0.172	0	37.53	3	399.3	1947
Q9Y4Y9	U6 snRNA-associated Sm-like protein LSm5 OS=Homo sapiens GN=LSM5 PE=1 SV=3	9.931	37.1	37.9	45.9	67.8	63.3	53.4	45.4	47.9	0.778	0	15.4	1	398.7	1948
Q9UL15-2	Isoform 2 of BAG family molecular chaperone regulator 5 OS=Homo sapiens GN=BAG5	55.992	47.9	35.5	39	54.6	75.2	59.1	42.1	45.1	0.083	0	33.1	1	398.5	1949
P08183	Multidrug resistance protein 1 OS=Homo sapiens GN=ABCB1 PE=1 SV=3	141.389	35.9	40.8	55.4	59.1	57	50.7	42.2	51.9	0.067	0	138.86	2	393	1950
Q14566	DNA replication licensing factor MCM6 OS=Homo sapiens GN=MCM6 PE=1 SV=1	92.831	40.5	37.1	45.4	65.5	61.7	56	35.7	50	0.129	0	62.18	3	391.9	1951
Q9NS00	Glycoprotein-N-acetylgalactosamine 3-beta-galactosyltransferase 1 OS=Homo sapiens GN=C1GALT1 PE=1 SV=1	42.176	47.9	39.8	38.5	52.1	56.1	55	47	54.4	0.122	0	26.29	1	390.8	1952
Q8N5N7	39S ribosomal protein L50, mitochondrial OS=Homo sapiens GN=MRPL50 PE=1 SV=2	18.313	43.4	36	46.1	59.5	60.1	57.6	38.9	47.9	0.233	0	33.26	1	389.5	1953
O15446-2	Isoform 2 of DNA-directed RNA polymerase I subunit RPA34 OS=Homo sapiens GN=CD3EAP	55.137	48.5	33.9	31.4	39.2	79.4	51.8	38.8	65	0.122	0	46.09	1	388	1954
Q4G0J3-3	Isoform 3 of La-related protein 7 OS=Homo sapiens GN=LARP7	67.612	54.6	38.8	36.5	47.9	70.5	52.2	34.2	52.3	0.064	0	52.85	1	387	1955
Q16643-3	Isoform 3 of Drebrin OS=Homo sapiens GN=DBN1	76.253	39.2	41.1	38.2	57.4	61	55.6	47.1	46.2	0.166	0	36.72	2	385.8	1956
P39880-3	Isoform 3 of Homeobox protein cut-like 1 OS=Homo sapiens GN=CUX1	165.587	37.7	40	48.2	60.7	56.1	52.5	44.4	46.1	0.028	0	65.39	1	385.7	1957
Q8NBU5	ATPase family AAA domain-containing protein 1 OS=Homo sapiens GN=ATAD1 PE=1 SV=1	40.718	40.2	39.6	41.8	60	61.6	53.3	43	45.8	0.931	0	50.2	5	385.3	1958
Q99471	Prefoldin subunit 5 OS=Homo sapiens GN=PFDN5 PE=1 SV=2	17.317	36.3	39.4	45.2	56.6	60.6	52.8	45.7	48.7	0.585	0	54.9	2	385.3	1959
A0A024RA52	Proteasome subunit alpha type OS=Homo sapiens GN=PSMA2 PE=1 SV=1	25.882	43	43.5	40.7	47.4	55.4	52.8	34.2	66.6	0.425	0	57.62	2	383.6	1960
P49643	DNA primase large subunit OS=Homo sapiens GN=PRIM2 PE=1 SV=2	58.769	33.1	39.6	37.7	52.5	61.9	51.8	44.6	61.7	0.066	0	22.73	1	382.9	1961
O95427	GPI ethanolamine phosphate transferase 1 OS=Homo sapiens GN=PIGN PE=1 SV=1	105.741	51.9	46	44.7	55.7	56	49.9	34.9	43.7	0.129	0	38.46	2	382.8	1962
Q96BN8	Ubiquitin thioesterase otulin OS=Homo sapiens GN=OTULIN PE=1 SV=3	40.237	45.7	34.6	39.2	49.6	72.5	53.4	38.6	46.6	0.212	0	32.66	2	380.2	1963
O15381	Nuclear valosin-containing protein-like OS=Homo sapiens GN=NVL PE=1 SV=1	94.991	41.3	40.2	39.5	48.7	60	51	42	57.5	0.142	0	70.04	3	380.2	1964
O00559-2	Isoform 2 of Receptor-binding cancer antigen expressed on SiSo cells OS=Homo sapiens GN=EBAG9	29.448	45.2	41.2	43.6	51.8	61.8	51.8	43.5	38.7	0.259	0	41.3	1	377.6	1965
Q9H5H4	Zinc finger protein 768 OS=Homo sapiens GN=ZNF768 PE=1 SV=2	60.191	51.9	34	40.1	49.7	61.8	54.7	43.1	40.8	0.133	0	33.38	3	376.1	1966
Q7L0Y3	Mitochondrial ribonuclease P protein 1 OS=Homo sapiens GN=TRMT10C PE=1 SV=2	47.317	47.3	36.4	33.6	65.8	67.4	53.6	32.7	38.7	0.172	0	29.86	2	375.5	1967
Q8N1F8	Serine/threonine-protein kinase 11-interacting protein OS=Homo sapiens GN=STK11IP PE=1 SV=3	121.325	47.2	34.3	41.8	51.1	58.2	46.1	37.6	57.7	0.04	0	43.99	1	374	1968
Q9NQT5	Exosome complex component RRP40 OS=Homo sapiens GN=EXOSC3 PE=1 SV=3	29.553	47.8	34.4	31.1	35.3	75.3	56.3	41.4	50.9	0.389	0	59.89	2	372.5	1969
Q02790	Peptidyl-prolyl cis-trans isomerase FKBP4 OS=Homo sapiens GN=FKBP4 PE=1 SV=3	51.772	40.8	38.7	45.7	57.8	50.4	50	43.4	45.2	0.077	0	49.94	1	372	1970
P34932	Heat shock 70 kDa protein 4 OS=Homo sapiens GN=HSPA4 PE=1 SV=4	94.271	42.1	37.2	44.3	50.5	57.8	47.8	41.3	47.8	0.083	0	26.76	2	368.8	1971
Q5VZK9	F-actin-uncapping protein LRRC16A OS=Homo sapiens GN=LRRC16A PE=1 SV=1	151.462	47	36.7	41.4	56.4	57.7	47	36	46.5	0.027	0	41.35	1	368.7	1972
Q8N7H5	RNA polymerase II-associated factor 1 homolog OS=Homo sapiens GN=PAF1 PE=1 SV=2	59.939	48.4	32.7	36.2	41.5	74.7	62.9	34.9	35.5	0.064	0	0	1	366.8	1973
P14635	G2/mitotic-specific cyclin-B1 OS=Homo sapiens GN=CCNB1 PE=1 SV=1	48.306	41.7	34	40.7	62.3	45.7	44.4	42.9	54.2	0.688	0	72.92	5	365.9	1974
Q9P2S5	WD repeat-containing protein WRAP73 OS=Homo sapiens GN=WRAP73 PE=1 SV=1	51.555	48.4	35.8	39.9	48.9	65.3	48.6	34.6	42.9	0.08	0	32.78	1	364.4	1975
Q8WWK9	Cytoskeleton-associated protein 2 OS=Homo sapiens GN=CKAP2 PE=1 SV=1	76.939	47.6	40.1	26.6	40.8	76.8	59.3	34.5	37.6	0.048	0	40.91	1	363.3	1976
Q03701	CCAAT/enhancer-binding protein zeta OS=Homo sapiens GN=CEBPZ PE=1 SV=3	120.898	51.8	38.1	25.4	35	68.9	57.6	40.5	43	0.172	0	45.7633	4	360.3	1977
P62987	Ubiquitin-60S ribosomal protein L40 OS=Homo sapiens GN=UBA52 PE=1 SV=2	14.719	43.3	37.3	31.3	30.5	85.3	54.3	31.2	46	11.915	0	385.44	4	359.2	1978
Q9Y570-4	Isoform 4 of Protein phosphatase methylesterase 1 OS=Homo sapiens GN=PPME1	43.842	38.8	32.4	42.7	54.4	48.1	48.4	45.7	48.6	0.11	0	0	1	359.1	1979
Q96GX2	Putative ataxin-7-like protein 3B OS=Homo sapiens GN=ATXN7L3B PE=3 SV=2	10.764	49.4	36.2	32.9	47.4	62.4	43.6	45.6	41.2	1.154	0	48.17	2	358.7	1980
P33527-9	Isoform 9 of Multidrug resistance-associated protein 1 OS=Homo sapiens GN=ABCC1	172.53	41.4	39.3	36.6	48.7	70.6	43.9	37.3	40	0.113	0	73.2267	4	357.8	1981
Q96P11-4	Isoform 4 of Probable 28S rRNA (cytosine-C(5))-methyltransferase OS=Homo sapiens GN=NSUN5	51.029	46.6	37.8	31.8	41	68	54.1	34.1	43.1	0.172	0	31.43	2	356.5	1982
O60518	Ran-binding protein 6 OS=Homo sapiens GN=RANBP6 PE=1 SV=2	124.633	47.1	34.2	39.9	46.3	56.8	46.7	36.5	49	0.316	0	269.955	6	356.5	1983
Q96FL8-3	Isoform 3 of Multidrug and toxin extrusion protein 1 OS=Homo sapiens GN=SLC47A1	63.508	38.6	38.5	42	48.2	52.7	47.2	41.5	47.7	0.11	0	25.87	1	356.4	1984
P56270-2	Isoform 2 of Myc-associated zinc finger protein OS=Homo sapiens GN=MAZ	51.04	45.4	38	35.9	36.4	73	45.4	30.8	48.7	0.105	0	23.07	1	353.6	1985
Q86XL3	Ankyrin repeat and LEM domain-containing protein 2 OS=Homo sapiens GN=ANKLE2 PE=1 SV=4	104.05	41.9	45.6	45.3	45.8	54.2	44	37.6	39.1	0.264	0	50.5	6	353.5	1986
Q9Y219	Protein jagged-2 OS=Homo sapiens GN=JAG2 PE=1 SV=3	133.277	47.9	34.6	42.4	51.4	48	44.1	43.3	40.8	0.038	0	41.31	1	352.5	1987
Q9H4L5	Oxysterol-binding protein-related protein 3 OS=Homo sapiens GN=OSBPL3 PE=1 SV=1	101.16	38.5	31.9	43.5	56.9	46.6	48.5	40	43.3	0.045	0	36.04	1	349.2	1988
Q7GXZ5	NADH-ubiquinone oxidoreductase chain 3 OS=Homo sapiens GN=ND3 PE=3 SV=1	13.177	31.2	35.8	29.7	43.8	43.8	49.8	52.6	60.2	0.778	0	30.36	1	346.9	1989
P37198	Nuclear pore glycoprotein p62 OS=Homo sapiens GN=NUP62 PE=1 SV=3	53.222	41.9	29.4	36.5	46.6	66.2	46.3	32.4	47.4	0.701	0	51.94	3	346.7	1990
Q96AE7-2	Isoform 2 of Tetratricopeptide repeat protein 17 OS=Homo sapiens GN=TTC17	108.544	36.3	35	36.9	43.1	53.2	50.5	39.7	49.3	0.083	0	37.17	2	344	1991
O43252	Bifunctional 3'-phosphoadenosine 5'-phosphosulfate synthase 1 OS=Homo sapiens GN=PAPSS1 PE=1 SV=2	70.788	43.6	33	37.5	53.2	44.8	43.2	43.7	44.7	0.064	0	17.88	1	343.7	1992
Q9BPX3	Condensin complex subunit 3 OS=Homo sapiens GN=NCAPG PE=1 SV=1	114.262	36.7	28.8	38.4	52	42.5	53.5	40.3	51.4	0.042	0	30.18	1	343.6	1993
Q9BVG9	Phosphatidylserine synthase 2 OS=Homo sapiens GN=PTDSS2 PE=1 SV=1	56.216	34.7	32.9	37.4	43.1	55.1	51.2	33.9	54.8	0.245	0	92.26	2	343.1	1994
Q14807	Kinesin-like protein KIF22 OS=Homo sapiens GN=KIF22 PE=1 SV=5	73.217	33.1	30.7	36.9	51.8	49.5	49.1	38.8	47.9	0.119	0	36.12	2	337.8	1995
P51812	Ribosomal protein S6 kinase alpha-3 OS=Homo sapiens GN=RPS6KA3 PE=1 SV=1	83.683	37.4	31.6	43.1	48.5	55.8	43.2	36.8	39.1	0.101	0	42.69	2	335.5	1996
Q9H4L4	Sentrin-specific protease 3 OS=Homo sapiens GN=SENP3 PE=1 SV=2	64.969	39	35.7	39.1	42.2	51.5	48.7	30.2	47.3	0.08	0	56.66	1	333.7	1997
O75616	GTPase Era, mitochondrial OS=Homo sapiens GN=ERAL1 PE=1 SV=2	48.319	40	33.8	28.4	42.5	51.6	49.9	36.1	50.9	0.186	0	36.25	2	333.2	1998
O00519	Fatty-acid amide hydrolase 1 OS=Homo sapiens GN=FAAH PE=1 SV=2	63.025	43.1	33	32.7	49.7	50.9	44.8	34	42.2	0.075	0	69	1	330.4	1999
[truncated: 132 more rows]

## Sheet: Normalized1
Accession	Description	MW [kDa]	Abundance: F1: 126, Sample, 0 , WT	Abundance: F1: 127N, Sample, 30 , WT	Abundance: F1: 127C, Sample, 60 , WT	Abundance: F1: 128N, Sample, 120 , WT	Abundance: F1: 129N, Sample, 0 , KO	Abundance: F1: 130N, Sample, 30 , KO	Abundance: F1: 130C, Sample, 60 , KO	Abundance: F1: 131, Sample, 120 , KO	emPAI	# Razor Peptides	Score Mascot	# Peptides	Total Abund.	Abund. Rank	Notes
P04925	Major prion protein OS=Mus musculus GN=Prnp PE=1SV=2	55.685	1000	1000	1000	1000	1000	1000	1000	1000	6699.19	0	10118.6	29	8000	1	The abundance values are normalized such that PrP is arbitrarily assigned a value of 1000 for each time point. Immunoblotting of the total lysates from this experiment shows that very little degradation occurs at 30 and 60 min, with most of the degradation occurring at the 120 min time point. Thus, the 120 min time point is over-represented after normalization. However, one can use this normalize…
P11021	78 kDa glucose-regulated protein OS=Homo sapiens GN=HSPA5 PE=1 SV=2	72.288	1056.38	648.656	379.387	667.298	893.951	850.996	730.825	1202.93	1250.88	4	8904.55	41	6430.42	2
P07437	Tubulin beta chain OS=Homo sapiens GN=TUBB PE=1 SV=2	49.639	851.884	690.218	688.264	669.535	862.497	836.978	636.558	813.766	11052	32	9757.63	25	6049.7	3
F5H5D3	Tubulin alpha-1C chain OS=Homo sapiens GN=TUBA1C PE=1 SV=1	57.693	811.619	725.734	675.416	647.438	851.124	800.848	594.813	773.707	1267.96	32	10367.1	24	5880.7	4
P27824-2	Isoform 2 of Calnexin OS=Homo sapiens GN=CANX	71.458	631.532	535.913	461.508	458.333	843.865	895.764	585.953	1101.02	999	11	3697.36	39	5513.89	5
P55072	Transitional endoplasmic reticulum ATPase OS=Homo sapiens GN=VCP PE=1 SV=4	89.266	316.21	514.857	522.448	367.393	396.152	793.605	815.134	941.348	617.966	0	7355.84	55	4667.15	6
P05141	ADP/ATP translocase 2 OS=Homo sapiens GN=SLC25A5 PE=1 SV=7	32.831	377.864	286.372	289.792	305.833	357.98	394.453	322.475	432.416	70.969	14	2010.51	20	2767.19	7
P52272	Heterogeneous nuclear ribonucleoprotein M OS=Homo sapiens GN=HNRNPM PE=1 SV=3	77.464	388.4	242.146	197.015	180.115	373.061	315.073	215.215	269.842	46.068	20	3260.6	46	2180.87	8
P13639	Elongation factor 2 OS=Homo sapiens GN=EEF2 PE=1 SV=4	95.277	217.219	223.929	276.656	304.615	232.361	303.156	302.26	416.831	29.303	0	2654.45	46	2277.03	9
P11142	Heat shock cognate 71 kDa protein OS=Homo sapiens GN=HSPA8 PE=1 SV=1	70.854	278.925	216.634	246.899	289.516	244.944	274.135	245.698	377.25	169.125	5	3687.23	35	2174	10
P36578	60S ribosomal protein L4 OS=Homo sapiens GN=RPL4 PE=1 SV=5	47.667	289.611	221.623	189.202	177.382	307.29	294.907	213.52	290.905	67.129	0	2499.12	24	1984.44	11
P23396	40S ribosomal protein S3 OS=Homo sapiens GN=RPS3 PE=1 SV=2	26.671	259.826	219.349	203.906	190.4	288.921	284.228	219.487	287.459	205.914	0	2139.48	19	1953.58	12
H3BLZ8	Probable ATP-dependent RNA helicase DDX17 OS=Homo sapiens GN=DDX17 PE=1 SV=1	80.389	298.381	194.722	157.76	141.389	348.345	272.311	161.493	198.968	69.795	9	2872.83	35	1773.37	13
P15880	40S ribosomal protein S2 OS=Homo sapiens GN=RPS2 PE=1 SV=2	31.305	230.525	198.695	187.531	182.626	256.883	264.923	203.085	278.793	42.288	0	2566.28	18	1803.06	14
P19338	Nucleolin OS=Homo sapiens GN=NCL PE=1 SV=3	76.568	274.993	190.154	164.786	157.976	255.962	253.346	190.432	287.323	12.991	0	1906.53	36	1774.97	15
P68363	Tubulin alpha-1B chain OS=Homo sapiens GN=TUBA1B PE=1 SV=1	50.12	253.321	196.825	180.494	168.315	256.497	237.401	139.936	211.814	6811.92	5	11951.3	24	1644.6	16
P39023	60S ribosomal protein L3 OS=Homo sapiens GN=RPL3 PE=1 SV=2	46.08	227.84	190.826	163.072	146.88	261.032	238.447	169.157	238.958	186.382	25	1743.25	24	1636.21	17
P04843	Dolichyl-diphosphooligosaccharide--protein glycosyltransferase subunit 1 OS=Homo sapiens GN=RPN1 PE=1 SV=1	68.527	157.292	179.763	215.576	208.602	149.822	243.289	230.299	330.975	19.753	0	2167.92	31	1715.62	18
P49327	Fatty acid synthase OS=Homo sapiens GN=FASN PE=1 SV=3	273.254	175.599	169.655	225.271	248.086	153.256	208.916	210.01	284.905	5.589	0	3219.7	74	1675.7	19
P62701	40S ribosomal protein S4, X isoform OS=Homo sapiens GN=RPS4X PE=1 SV=2	29.579	210.961	178.465	154.572	145.826	238.153	234.014	174.245	236.258	99	0	2013.98	17	1572.49	20
Q00325-2	Isoform B of Phosphate carrier protein, mitochondrial OS=Homo sapiens GN=SLC25A3	39.933	201.213	154.862	174.516	181.041	193.581	219.659	189.063	260.315	40.596	0	1155.41	15	1574.25	21
P27708	CAD protein OS=Homo sapiens GN=CAD PE=1 SV=3	242.829	207.886	179.365	201.688	205.958	173.097	187.154	162.435	213.228	5.51	0	2912.02	71	1530.81	22
P63244	Receptor of activated protein C kinase 1 OS=Homo sapiens GN=RACK1 PE=1 SV=3	35.055	204.496	157.816	160.019	147.407	212.429	213.074	168.621	223.99	80.113	0	2122.65	19	1487.85	23
Q08211	ATP-dependent RNA helicase A OS=Homo sapiens GN=DHX9 PE=1 SV=4	140.869	212.136	164.711	140.12	139.538	215.773	210.967	155.615	223.719	10.938	0	3773.81	48	1462.58	24
P05388	60S acidic ribosomal protein P0 OS=Homo sapiens GN=RPLP0 PE=1 SV=1	34.252	202.237	164.525	136.239	123.528	226.694	217.865	158.498	225.061	99	0	1825.11	17	1454.65	25
P62424	60S ribosomal protein L7a OS=Homo sapiens GN=RPL7A PE=1 SV=2	29.977	205.347	154.643	138.514	125.922	216.359	209.672	150.341	209.29	734.642	0	2179.55	18	1410.09	26
Q9BQG0-2	Isoform 2 of Myb-binding protein 1A OS=Homo sapiens GN=MYBBP1A	149.274	220.125	158.054	128.534	126.672	202.126	193.943	146.348	208.581	7.175	0	2497.66	50	1384.38	27
P16615	Sarcoplasmic/endoplasmic reticulum calcium ATPase 2 OS=Homo sapiens GN=ATP2A2 PE=1 SV=1	114.683	154.25	159.966	188.552	199.933	124.99	177.547	178.935	259.777	47.438	0	2891.46	49	1443.95	28
P18124	60S ribosomal protein L7 OS=Homo sapiens GN=RPL7 PE=1 SV=1	29.207	194.652	153.021	133.482	123.889	209.148	207.156	152.259	198.433	85.596	0	1150.48	17	1372.04	29
P25705	ATP synthase subunit alpha, mitochondrial OS=Homo sapiens GN=ATP5A1 PE=1 SV=1	59.714	163.077	144.619	164.016	171.036	166.894	195.924	155.399	232.688	31.622	0	2835.21	26	1393.65	30
A0A0G2JIW1	Heat shock 70 kDa protein 1B OS=Homo sapiens GN=HSPA1B PE=1 SV=1	70.066	204.086	158.902	174.793	202.415	141.226	163.924	139.2	205.486	41.813	8	2700.49	32	1390.03	31
Q99623	Prohibitin-2 OS=Homo sapiens GN=PHB2 PE=1 SV=2	33.276	142.037	154.291	169.023	180.917	113.57	198.485	186.126	264.769	40.246	0	2114.36	20	1409.22	32
Q02878	60S ribosomal protein L6 OS=Homo sapiens GN=RPL6 PE=1 SV=3	32.708	187.372	150.635	132.596	121.515	204.597	192.398	142.606	201.649	99	0	1400.18	18	1333.37	33
Q96AG4	Leucine-rich repeat-containing protein 59 OS=Homo sapiens GN=LRRC59 PE=1 SV=1	34.909	165.172	125.829	111.848	113.22	224.996	208.719	154.624	207.571	67.129	0	1391.39	14	1311.98	34
P46781	40S ribosomal protein S9 OS=Homo sapiens GN=RPS9 PE=1 SV=3	22.578	184.9	147.489	130.315	115.191	200.194	194.094	145.012	196.541	83.834	0	499.86	17	1313.74	35
P68104	Elongation factor 1-alpha 1 OS=Homo sapiens GN=EEF1A1 PE=1 SV=1	50.109	156.555	134.742	158.72	222.761	121.778	166.678	159.727	245.534	119.226	0	1644.07	20	1366.5	36
P35232	Prohibitin OS=Homo sapiens GN=PHB PE=1 SV=1	29.786	138.37	142.854	159.388	174.765	111.264	192.192	180.187	256.745	99	0	1804.84	16	1355.77	37
P06748	Nucleophosmin OS=Homo sapiens GN=NPM1 PE=1 SV=2	32.555	157.419	127.301	147.521	129.314	171.336	177.404	151.027	209.022	315.228	0	1446.85	14	1270.34	38
P46777	60S ribosomal protein L5 OS=Homo sapiens GN=RPL5 PE=1 SV=3	34.341	185.45	142.003	116.826	108.263	192.252	181.75	125.69	179.491	214.443	0	1719.73	15	1231.73	39
Q9NR30	Nucleolar RNA helicase 2 OS=Homo sapiens GN=DDX21 PE=1 SV=5	87.29	170.859	140.358	132.194	130.155	146.378	167.855	138.354	186.686	19.806	1	2012.52	30	1212.84	40
P04844	Dolichyl-diphosphooligosaccharide--protein glycosyltransferase subunit 2 OS=Homo sapiens GN=RPN2 PE=1 SV=3	69.241	105.578	126.815	148.54	145.784	107.13	167.525	171.834	255.464	31.819	0	1828.23	20	1228.67	41
P46109	Crk-like protein OS=Homo sapiens GN=CRKL PE=1 SV=1	33.756	121.54	120.997	155.014	178.735	102.566	147.346	151.718	221.301	378.269	0	2596.92	19	1199.22	42
P51572-2	Isoform 2 of B-cell receptor-associated protein 31 OS=Homo sapiens GN=BCAP31	34.73	109.615	143.047	165.754	157.057	90.6015	153.437	148.794	212.203	32.598	0	911.213	16	1180.51	43
P63173	60S ribosomal protein L38 OS=Homo sapiens GN=RPL38 PE=1 SV=2	8.213	152.7	125.425	107.663	98.566	167.348	163.975	121.921	174.07	46414.9	0	525.718	6	1111.67	44
P78527	DNA-dependent protein kinase catalytic subunit OS=Homo sapiens GN=PRKDC PE=1 SV=3	468.788	138.349	128.097	156.006	163.51	105.597	127.55	118.451	158.238	1.666	0	2234.16	94	1095.8	45
P39019	40S ribosomal protein S19 OS=Homo sapiens GN=RPS19 PE=1 SV=2	16.051	140.868	114.555	99.7229	88.7588	162.485	156.318	110.766	151.533	176.828	0	1171.85	12	1025.01	46
P26373	60S ribosomal protein L13 OS=Homo sapiens GN=RPL13 PE=1 SV=4	24.247	142.902	119.885	103.96	93.7831	158.698	141.078	101.001	156.073	83.834	0	926.201	12	1017.38	47
P53621	Coatomer subunit alpha OS=Homo sapiens GN=COPA PE=1 SV=2	138.258	98.6441	108.35	142.004	124	106.124	150.711	140.764	187.501	6.049	0	1660.14	48	1058.1	48
Q92616	eIF-2-alpha kinase activator GCN1 OS=Homo sapiens GN=GCN1 PE=1 SV=6	292.572	120.27	105.242	122.71	128.9	123.534	134.169	113.129	156.468	3.522	0	2976.03	88	1004.42	49
P08670	Vimentin OS=Homo sapiens GN=VIM PE=1 SV=4	53.619	112.584	99.195	126.723	136.535	109.114	131.302	120.602	166.487	18.684	1	1629.19	24	1002.54	50
P30101	Protein disulfide-isomerase A3 OS=Homo sapiens GN=PDIA3 PE=1 SV=4	56.747	102.104	102.134	116.115	125.078	98.004	138.209	133.987	197.123	11.328	4	1141.42	22	1012.75	51
Q7KZF4	Staphylococcal nuclease domain-containing protein 1 OS=Homo sapiens GN=SND1 PE=1 SV=1	101.934	123.3	102.241	101.106	90.8712	148.992	146.546	112.229	145.714	9.798	0	2058.52	40	970.999	52
P05387	60S acidic ribosomal protein P2 OS=Homo sapiens GN=RPLP2 PE=1 SV=1	11.658	136.187	106.045	95.6209	85.1406	145.612	142.997	108.968	145.127	68128.2	4	2349.5	9	965.697	53
P62241	40S ribosomal protein S8 OS=Homo sapiens GN=RPS8 PE=1 SV=2	24.19	134.001	106.202	94.338	85.6056	145.126	145.454	108.401	143.483	198.526	0	1510.4	10	962.61	54
P04264	Keratin, type II cytoskeletal 1 OS=Homo sapiens GN=KRT1 PE=1 SV=6	65.999	124.57	96.7895	161.089	129.166	106.232	111.983	120.595	140.221	10.994	2	1497.2	25	990.644	55
P62280	40S ribosomal protein S11 OS=Homo sapiens GN=RPS11 PE=1 SV=3	18.419	136.13	107.714	94.0497	87.9306	144.323	144.47	106.684	135.151	99	0	563.415	10	956.453	56
P08238	Heat shock protein HSP 90-beta OS=Homo sapiens GN=HSP90AB1 PE=1 SV=4	83.212	100.324	88.9371	144.233	160.255	93.6604	125.299	122.591	159.243	10.743	13	1538.4	31	994.543	57
P83731	60S ribosomal protein L24 OS=Homo sapiens GN=RPL24 PE=1 SV=1	17.768	128.585	108.405	95.9282	85.4373	151.367	137.837	101.182	142.527	78.433	0	771.916	9	951.269	58
P06576	ATP synthase subunit beta, mitochondrial OS=Homo sapiens GN=ATP5B PE=1 SV=3	56.525	119.529	110.575	123.241	100.634	120.373	147.165	99.1495	145.28	21.638	0	1969.63	19	965.946	59
P11940	Polyadenylate-binding protein 1 OS=Homo sapiens GN=PABPC1 PE=1 SV=2	70.626	116.282	105.287	112.247	99.341	118.381	132.321	108.013	155.201	8.441	7	1225.1	27	947.072	60
P39656	Dolichyl-diphosphooligosaccharide--protein glycosyltransferase 48 kDa subunit OS=Homo sapiens GN=DDOST PE=1 SV=4	50.769	88.2609	102.889	118.91	120.435	83.8428	133.555	134.132	193.164	12.183	0	1305.71	13	975.187	61
P27797	Calreticulin OS=Homo sapiens GN=CALR PE=1 SV=1	48.112	98.8905	87.5009	103.682	96.3938	121.64	142.646	116.921	154.124	27.943	0	1106.72	17	921.798	62
P40429	60S ribosomal protein L13a OS=Homo sapiens GN=RPL13A PE=1 SV=2	23.562	128.446	99.2807	85.8079	83.3846	136.652	132.217	96.9928	133.709	37.747	0	1051.64	13	896.49	63
Q99497	Protein deglycase DJ-1 OS=Homo sapiens GN=PARK7 PE=1 SV=2	19.878	97.2207	94.9699	141.808	154.779	75.3433	111.691	103.631	162.865	169.125	0	974.95	15	942.306	64
P62906	60S ribosomal protein L10a OS=Homo sapiens GN=RPL10A PE=1 SV=2	24.816	126.039	101.11	86.2472	80.5636	137.686	134.282	99.5331	128.958	38.811	0	1084.12	10	894.42	65
Q15293	Reticulocalbin-1 OS=Homo sapiens GN=RCN1 PE=1 SV=1	38.866	36.7425	80.8107	132.024	167.048	37.3528	118.461	169.823	244.163	236.137	0	1740.57	14	986.425	66
P46779	60S ribosomal protein L28 OS=Homo sapiens GN=RPL28 PE=1 SV=3	15.738	128.573	96.8085	81.1319	71.9167	133.975	125.463	88.9401	125.728	99	0	889.716	10	852.535	67
P06493	Cyclin-dependent kinase 1 OS=Homo sapiens GN=CDK1 PE=1 SV=3	34.074	113.458	94.1339	100.518	97.4898	123.811	120.302	93.5025	116.155	45.416	2	1343.94	18	859.37	68
O00410-3	Isoform 3 of Importin-5 OS=Homo sapiens GN=IPO5	125.464	93.9779	93.8362	117.538	131.75	78.3687	108.629	109.128	162.822	6.12	3	1977	34	896.049	69
Q06830	Peroxiredoxin-1 OS=Homo sapiens GN=PRDX1 PE=1 SV=1	22.096	91.3015	92.6858	144.392	146.993	64.4714	100.76	111.216	149.472	70.969	3	1068.91	13	901.292	70
P62750	60S ribosomal protein L23a OS=Homo sapiens GN=RPL23A PE=1 SV=1	17.684	120.632	95.7963	81.2936	73.4556	131.99	128.772	91.0867	120.946	165.81	0	883.28	12	843.972	71
P17812	CTP synthase 1 OS=Homo sapiens GN=CTPS1 PE=1 SV=2	66.648	96.9027	90.5828	113.633	126.524	79.7494	109.743	108.071	155.932	18.307	1	1408.73	22	881.138	72
G8JLB6	Heterogeneous nuclear ribonucleoprotein H OS=Homo sapiens GN=HNRNPH1 PE=1 SV=1	51.197	130.078	93.1693	83.8539	83.1388	126.435	117.636	84.9113	118.407	23.245	8	1975.22	16	837.629	73
Q8NC51	Plasminogen activator inhibitor 1 RNA-binding protein OS=Homo sapiens GN=SERBP1 PE=1 SV=2	44.938	96.8311	88.6774	91.0473	84.9878	117.662	121.536	102.238	146.161	22.714	0	1104.2	18	849.141	74
P14625	Endoplasmin OS=Homo sapiens GN=HSP90B1 PE=1 SV=1	92.411	91.8616	85.2288	108.283	124.691	85.7621	113.342	103.425	142.401	7.348	1	1182.99	33	854.994	75
P53618	Coatomer subunit beta OS=Homo sapiens GN=COPB1 PE=1 SV=3	107.074	91.8343	89.2633	116.212	98.8472	98.8263	117.561	105.49	127.3	5.412	0	1094.88	32	845.334	76
P52597	Heterogeneous nuclear ribonucleoprotein F OS=Homo sapiens GN=HNRNPF PE=1 SV=3	45.643	129.392	91.071	83.7515	83.3426	123.463	114.855	84.7766	109.07	26.213	0	2423.53	15	819.721	77
P32969	60S ribosomal protein L9 OS=Homo sapiens GN=RPL9 PE=1 SV=1	21.85	108.537	88.3369	81.396	76.4472	129.242	119.723	87.8046	123.975	350.119	0	1601.12	9	815.461	78
P61247	40S ribosomal protein S3a OS=Homo sapiens GN=RPS3A PE=1 SV=2	29.926	105.858	88.7727	84.1908	77.6584	120.318	117.402	90.2204	124.536	68.519	0	1181.13	19	808.957	79
P62829	60S ribosomal protein L23 OS=Homo sapiens GN=RPL23 PE=1 SV=1	14.856	107.174	94.1577	82.7597	81.5224	115.274	116.898	90.792	119.849	99	0	1491.32	9	808.427	80
P23528	Cofilin-1 OS=Homo sapiens GN=CFL1 PE=1 SV=3	18.491	82.4828	82.2945	115.128	124.387	70.5955	100.123	102.366	156.39	260.016	2	660.875	15	833.767	81
O43795	Unconventional myosin-Ib OS=Homo sapiens GN=MYO1B PE=1 SV=3	131.902	97.2122	83.3591	96.8607	100.198	98.3122	106.265	95.6617	130.625	4.353	0	1000.95	37	808.495	82
P61313	60S ribosomal protein L15 OS=Homo sapiens GN=RPL15 PE=1 SV=2	24.131	107.484	86.8674	79.636	73.8276	115.509	116.5	87.5506	127.427	50.795	0	842.103	10	794.801	83
Q00839	Heterogeneous nuclear ribonucleoprotein U OS=Homo sapiens GN=HNRNPU PE=1 SV=6	90.528	110.908	89.392	82.8891	95.4084	93.7199	114.437	89.8496	125.319	10.078	0	1701.61	26	801.923	84
P08708	40S ribosomal protein S17 OS=Homo sapiens GN=RPS17 PE=1 SV=2	15.54	99.1706	85.1406	81.9269	74.5761	119.459	116.818	87.5405	119.23	21543.3	0	1268.45	9	783.862	85
P62753	40S ribosomal protein S6 OS=Homo sapiens GN=RPS6 PE=1 SV=1	28.663	101.518	87.5009	77.3964	70.3113	116.373	113.022	84.5404	118.959	202.092	0	1473.74	13	769.622	86
P62081	40S ribosomal protein S7 OS=Homo sapiens GN=RPS7 PE=1 SV=1	22.113	99.059	83.5878	77.2913	68.2675	112.966	111.198	84.0984	113.368	283.804	0	923.096	12	749.836	87
P25398	40S ribosomal protein S12 OS=Homo sapiens GN=RPS12 PE=1 SV=3	14.505	96.4352	78.3647	76.1458	65.9137	116.983	113.513	84.7843	108.359	1388.49	0	1663.82	9	740.498	88
O95793	Double-stranded RNA-binding protein Staufen homolog 1 OS=Homo sapiens GN=STAU1 PE=1 SV=2	63.143	103.953	83.3591	76.6795	67.8246	115.378	107.627	78.3828	103.574	10.45	1	897.303	21	736.778	89
P49207	60S ribosomal protein L34 OS=Homo sapiens GN=RPL34 PE=1 SV=3	13.284	107.423	83.2091	70.9361	62.8845	115.926	108.463	76.9526	110.446	67.129	0	610.166	6	736.24	90
Q86UE4	Protein LYRIC OS=Homo sapiens GN=MTDH PE=1 SV=2	63.799	97.6313	83.0209	69.3864	65.2936	115.429	111.501	82.0179	108.448	45.416	0	1963.7	27	732.727	91
J3QQ67	60S ribosomal protein L18 (Fragment) OS=Homo sapiens GN=RPL18 PE=1 SV=1	21.825	102.462	80.856	69.4673	63.0572	107.7	102.467	77.0948	108.068	128.155	0	1108.8	8	711.172	92
P61254	60S ribosomal protein L26 OS=Homo sapiens GN=RPL26 PE=1 SV=1	17.248	103.1	81.2752	65.0499	59.2153	111.196	105.206	75.0906	103.813	165.81	8	284.447	11	703.946	93
P22102	Trifunctional purine biosynthetic protein adenosine-3 OS=Homo sapiens GN=GART PE=1 SV=1	107.699	81.4594	82.7304	111.153	125.516	57.908	80.3799	82.5082	118.821	5.31	0	1542.52	36	740.477	94
Q02543	60S ribosomal protein L18a OS=Homo sapiens GN=RPL18A PE=1 SV=2	20.749	99.598	80.5559	66.6832	61.4518	109.869	104.205	77.0161	103.623	60.054	0	921.916	10	703.001	95
P62269	40S ribosomal protein S18 OS=Homo sapiens GN=RPS18 PE=1 SV=3	17.708	93.502	79.4841	72.0735	64.7024	106.734	104.054	78.1033	106.395	45.416	0	553.819	11	705.049	96
F8W727	60S ribosomal protein L32 OS=Homo sapiens GN=RPL32 PE=1 SV=1	17.951	97.248	77.1358	67.3085	63.9318	106.67	102.142	74.1075	103.441	45.416	0	530.545	9	691.985	97
P62937	Peptidyl-prolyl cis-trans isomerase A OS=Homo sapiens GN=PPIA PE=1 SV=2	18.001	72.6765	70.9315	100.806	116.424	61.0692	91.1404	88.6099	122.351	70.969	1	727.691	14	724.009	98
P10599	Thioredoxin OS=Homo sapiens GN=TXN PE=1 SV=3	11.73	81.4005	70.1384	70.5265	122.354	67.7928	95.7347	75.2811	125.08	267.27	0	1059.99	7	708.309	99
P46782	40S ribosomal protein S5 OS=Homo sapiens GN=RPS5 PE=1 SV=4	22.862	84.6011	75.6758	71.0547	65.1519	103.536	100.384	76.3531	110.273	198.526	0	1406.82	11	687.03	100
P46778	60S ribosomal protein L21 OS=Homo sapiens GN=RPL21 PE=1 SV=2	18.553	93.4493	76.1664	69.5158	64.8131	103.66	98.5514	71.7628	101.524	999	0	594.331	9	679.442	101
P62277	40S ribosomal protein S13 OS=Homo sapiens GN=RPS13 PE=1 SV=2	17.212	89.2337	77.9003	70.9469	65.3623	101.342	96.9861	69.9008	100.508	22.101	0	464.603	10	672.18	102
Q12907	Vesicular integral-membrane protein VIP36 OS=Homo sapiens GN=LMAN2 PE=1 SV=1	40.203	91.9143	122.333	155.903	149.741	36.4145	47.1212	44.2186	57.5061	9	0	779.63	12	705.152	103
Q8WVM8	Sec1 family domain-containing protein 1 OS=Homo sapiens GN=SCFD1 PE=1 SV=4	72.334	76.0077	86.7292	107.003	101.287	57.2093	84.9256	79.343	106.476	3.739	0	896.182	16	698.981	104
Q8IXB1	DnaJ homolog subfamily C member 10 OS=Homo sapiens GN=DNAJC10 PE=1 SV=2	91.021	70.2528	71.0815	71.0305	103.801	64.2121	92.9865	81.4463	130.85	8.427	0	1409.22	23	685.66	105
P27635	60S ribosomal protein L10 OS=Homo sapiens GN=RPL10 PE=1 SV=4	24.588	92.4049	74.3159	71.3674	64.9172	96.0801	95.4871	67.1065	93.094	48.239	11	884.098	10	654.773	106
P46977	Dolichyl-diphosphooligosaccharide--protein glycosyltransferase subunit STT3A OS=Homo sapiens GN=STT3A PE=1 SV=2	80.477	64.9654	70.4504	77.4692	80.8581	62.9473	98.7438	96.1774	132.776	3.642	1	806.555	15	684.387	107
Q9NVI7-2	Isoform 2 of ATPase family AAA domain-containing protein 3A OS=Homo sapiens GN=ATAD3A	66.177	72.0343	68.1116	83.261	86.5998	71.6695	87.4106	84.0425	119.544	9	15	1170.99	32	672.673	108
P62888	60S ribosomal protein L30 OS=Homo sapiens GN=RPL30 PE=1 SV=2	12.776	90.6635	72.9297	64.4247	57.6542	98.6722	96.7473	67.7263	94.5537	99	1	1138.61	7	643.372	109
P62258	14-3-3 protein epsilon OS=Homo sapiens GN=YWHAE PE=1 SV=1	29.155	68.9789	57.9584	91.8127	100.196	61.3621	80.6983	87.7996	125.495	11.915	4	609.66	15	674.301	110
O76021	Ribosomal L1 domain-containing protein 1 OS=Homo sapiens GN=RSL1D1 PE=1 SV=3	54.939	98.88	75.6734	60.1151	59.6826	89.982	91.9496	68.8974	98.9443	14.571	0	776.195	21	644.124	111
P62913	60S ribosomal protein L11 OS=Homo sapiens GN=RPL11 PE=1 SV=2	20.24	86.2899	70.8767	61.3603	58.0063	98.8934	95.14	71.557	98.1899	45.416	0	777.229	8	640.314	112
P46783	40S ribosomal protein S10 OS=Homo sapiens GN=RPS10 PE=1 SV=1	18.886	81.5373	71.5531	67.6939	61.8924	94.7467	88.4564	69.7001	100.902	33.551	0	881.228	13	636.482	113
P62805	Histone H4 OS=Homo sapiens GN=HIST1H4A PE=1 SV=2	11.36	79.1389	78.1528	54.0403	122.439	43.9711	94.1826	71.331	109.012	2153.43	0	808.258	8	652.268	114
Q9UJS0-2	Isoform 2 of Calcium-binding mitochondrial carrier protein Aralar2 OS=Homo sapiens GN=SLC25A13	74.257	73.283	65.506	72.6475	81.4715	64.7247	92.6991	81.7385	109.994	9	2	1475.54	25	642.064	115
A0A0C4DG17	40S ribosomal protein SA OS=Homo sapiens GN=RPSA PE=1 SV=1	33.293	77.4459	68.3188	66.0876	64.2928	88.4564	91.5583	70.7035	97.5105	55.234	0	1620.78	14	624.374	116
P62249	40S ribosomal protein S16 OS=Homo sapiens GN=RPS16 PE=1 SV=2	16.435	83.6388	69.7978	63.1768	59.0116	93.7275	83.9572	63.3977	100.939	30.623	0	530.735	12	617.647	117
O14654	Insulin receptor substrate 4 OS=Homo sapiens GN=IRS4 PE=1 SV=1	133.685	86.3405	75.0923	84.3121	85.7805	71.7473	76.334	66.9083	79.1134	5.397	0	1644.46	34	625.628	118
P18621-3	Isoform 3 of 60S ribosomal protein L17 OS=Homo sapiens GN=RPL17	26.356	87.5702	70.4599	57.7892	50.5086	96.3746	91.2952	65.2699	89.4779	10.659	0	629.676	8	608.746	119
P49755	Transmembrane emp24 domain-containing protein 10 OS=Homo sapiens GN=TMED10 PE=1 SV=2	24.96	103.487	144.695	159.121	127.436	23.5196	26.9665	23.3756	31.5054	10.938	0	1893.91	6	640.107	120
P30050	60S ribosomal protein L12 OS=Homo sapiens GN=RPL12 PE=1 SV=1	17.808	83.7525	65.8966	60.3793	54.9572	91.2834	87.0967	64.9574	90.2639	350.119	0	1508.08	10	598.587	121
Q02978	Mitochondrial 2-oxoglutarate/malate carrier protein OS=Homo sapiens GN=SLC25A11 PE=1 SV=3	34.04	72.8176	60.4711	65.7372	72.1071	67.3733	85.0206	76.0051	110.858	14.505	0	970.064	14	610.39	122
P62917	60S ribosomal protein L8 OS=Homo sapiens GN=RPL8 PE=1 SV=2	28.007	82.2659	65.5155	55.5172	51.1109	93.4514	88.096	63.9667	89.5269	25.827	0	863.826	12	589.451	123
P07355-2	Isoform 2 of Annexin A2 OS=Homo sapiens GN=ANXA2	40.386	47.13	59.6494	89.2388	114.25	40.662	71.1007	91.5744	111.005	9	0	747.256	19	624.61	124
Q15365	Poly(rC)-binding protein 1 OS=Homo sapiens GN=PCBP1 PE=1 SV=2	37.474	63.8852	62.7575	79.3989	89.6379	53.8894	76.4909	76.1219	110.458	14.505	7	1090.75	14	612.639	125
Q14165	Malectin OS=Homo sapiens GN=MLEC PE=1 SV=1	32.214	57.5512	65.4202	76.2914	76.7306	52.2326	82.9689	79.6046	120.474	16.783	0	765.156	15	611.273	126
O15260	Surfeit locus protein 4 OS=Homo sapiens GN=SURF4 PE=1 SV=3	30.374	49.2357	63.8983	83.4254	85.4041	48.3101	76.7164	83.7758	111.652	67.129	0	1272.9	7	602.418	127
Q53GQ0	Very-long-chain 3-oxoacyl-CoA reductase OS=Homo sapiens GN=HSD17B12 PE=1 SV=2	34.302	70.4065	64.158	66.1792	69.1111	69.0469	75.3567	65.186	94.0758	24.809	0	1012.63	13	573.52	128
O75947	ATP synthase subunit d, mitochondrial OS=Homo sapiens GN=ATP5H PE=1 SV=3	18.479	65.5339	53.2236	60.9318	66.93	68.191	81.9917	65.1784	101.348	80.113	0	560.875	14	563.329	129
Q92945	Far upstream element-binding protein 2 OS=Homo sapiens GN=KHSRP PE=1 SV=4	73.07	59.181	58.773	75.2699	86.5489	49.8663	69.9356	72.4258	102.891	5.813	1	1400.35	21	574.892	130
P05787-2	Isoform 2 of Keratin, type II cytoskeletal 8 OS=Homo sapiens GN=KRT8	56.573	71.0109	53.619	65.4623	67.9309	77.8988	74.6205	61.2435	78.2957	8.363	3	810.049	25	550.082	131
U3KQK0	Histone H2B OS=Homo sapiens GN=HIST1H2BN PE=1 SV=1	18.792	69.2379	77.8265	46.2055	94.0067	41.1166	93.1833	56.4246	83.596	9	4	691.993	8	561.597	132
P60709	Actin, cytoplasmic 1 OS=Homo sapiens GN=ACTB PE=1 SV=1	41.71	53.4135	53.0069	78.1807	89.5737	50.9266	75.9846	68.9812	90.8685	13.925	12	1085.64	14	560.936	133
Q08J23	tRNA (cytosine(34)-C(5))-methyltransferase OS=Homo sapiens GN=NSUN2 PE=1 SV=2	86.416	71.7163	55.9983	59.2015	55.3757	74.0877	78.1624	62.4679	82.3868	5.494	0	1121.9	27	539.397	134
P61353	60S ribosomal protein L27 OS=Homo sapiens GN=RPL27 PE=1 SV=2	15.788	76.4015	63.322	52.4555	48.3563	83.1898	74.3397	53.4931	77.9819	999	0	495.071	9	529.54	135
Q16531	DNA damage-binding protein 1 OS=Homo sapiens GN=DDB1 PE=1 SV=1	126.887	71.7795	59.8852	64.5972	63.1613	64.6499	71.2754	61.6627	81.5203	2.609	0	626.776	28	538.531	136
P68371	Tubulin beta-4B chain OS=Homo sapiens GN=TUBB4B PE=1 SV=1	49.799	77.9113	57.3249	56.2341	55.1742	81.4521	73.8577	51.8267	62.6538	6699.19	5	8170.83	23	516.435	137
Q14257-2	Isoform 2 of Reticulocalbin-2 OS=Homo sapiens GN=RCN2	39.115	42.468	53.6523	59.347	78.3293	39.6626	55.107	75.4691	154.642	27.184	0	1336.89	15	558.678	138
P62847-4	Isoform 4 of 40S ribosomal protein S24 OS=Homo sapiens GN=RPS24	32.41	72.2448	58.6515	53.8651	49.5853	75.1907	73.9882	56.1477	80.6018	12.895	0	631.556	6	520.275	139
P62851	40S ribosomal protein S25 OS=Homo sapiens GN=RPS25 PE=1 SV=1	13.734	68.4925	56.7557	52.0728	46.4055	78.0819	78.2818	59.92	77.6508	99	0	441.761	5	517.661	140
P12236	ADP/ATP translocase 3 OS=Homo sapiens GN=SLC25A6 PE=1 SV=4	32.845	66.6963	55.8482	58.6059	61.5979	63.2006	71.8436	62.694	83.0865	47.064	4	1653.35	20	523.573	141
Q9BVK6	Transmembrane emp24 domain-containing protein 9 OS=Homo sapiens GN=TMED9 PE=1 SV=2	27.26	66.65	89.5587	103.714	86.4382	33.6119	50.0971	48.2703	61.9398	22.714	3	833.907	12	540.28	142
Q9NZI8	Insulin-like growth factor 2 mRNA-binding protein 1 OS=Homo sapiens GN=IGF2BP1 PE=1 SV=2	63.441	76.351	57.0486	53.981	50.9271	71.906	73.4067	53.6252	76.6719	5.813	1	1034.04	20	513.918	143
P09661	U2 small nuclear ribonucleoprotein A' OS=Homo sapiens GN=SNRPA1 PE=1 SV=2	28.398	48.5345	55.4195	73.9143	79.0623	47.1994	68.4366	65.1784	92.5326	45.416	0	737.241	16	530.278	144
P28288	ATP-binding cassette sub-family D member 3 OS=Homo sapiens GN=ABCD3 PE=1 SV=1	75.428	55.1486	51.8541	59.7702	67.1869	50.1378	68.2752	66.1107	101.368	2.001	1	634.014	16	519.852	145
O15371	Eukaryotic translation initiation factor 3 subunit D OS=Homo sapiens GN=EIF3D PE=1 SV=1	63.932	76.89	55.9125	47.6932	43.6332	84.3432	70.9305	48.6742	58.0416	10.86	0	1212.02	15	486.118	146
P50402	Emerin OS=Homo sapiens GN=EMD PE=1 SV=1	28.976	61.9353	55.7649	57.1343	52.3731	67.7928	72.4383	58.3019	72.6672	33.145	0	1118.98	13	498.408	147
P18031	Tyrosine-protein phosphatase non-receptor type 1 OS=Homo sapiens GN=PTPN1 PE=1 SV=1	49.935	50.4423	56.8509	66.3679	67.7759	42.1602	69.5288	65.8186	91.9971	5.898	0	508.055	18	510.942	148
Q53H12	Acylglycerol kinase, mitochondrial OS=Homo sapiens GN=AGK PE=1 SV=2	47.107	55.7487	49.7154	54.8057	59.2928	63.1731	67.6672	60.9869	78.5059	12.335	0	1003.52	17	489.896	149
Q9BUF5	Tubulin beta-6 chain OS=Homo sapiens GN=TUBB6 PE=1 SV=1	49.825	62.5775	52.9045	54.3098	50.6858	74.7498	67.7291	51.5549	62.4063	89.852	1	3474.5	18	476.918	150
Q96DZ1	Endoplasmic reticulum lectin 1 OS=Homo sapiens GN=ERLEC1 PE=1 SV=1	54.823	58.2692	58.4443	58.5546	51.773	49.0409	72.6218	68.0184	76.8389	4.946	0	518.631	19	493.561	151
Q12906-7	Isoform 7 of Interleukin enhancer-binding factor 3 OS=Homo sapiens GN=ILF3	95.748	62.5143	52.1376	49.1459	57.3265	60.1599	63.9462	52.5888	87.0048	4.217	3	688.498	23	484.824	152
Q9HAV4	Exportin-5 OS=Homo sapiens GN=XPO5 PE=1 SV=1	136.222	53.8283	51.5683	66.0876	74.6846	43.9437	61.0013	59.4247	85.0788	1.462	0	555.484	25	495.617	153
P54136	Arginine--tRNA ligase, cytoplasmic OS=Homo sapiens GN=RARS PE=1 SV=2	75.331	50.5097	47.4456	64.678	71.1992	48.2521	60.7227	60.7355	89.0173	5.176	0	849.094	29	492.56	154
Q7L2E3-2	Isoform 2 of Putative ATP-dependent RNA helicase DHX30 OS=Homo sapiens GN=DHX30	136.03	61.9458	53.2165	53.6414	51.649	62.3081	66.1063	53.892	73.3553	1.834	0	743.461	32	476.114	155
P16402	Histone H1.3 OS=Homo sapiens GN=HIST1H1D PE=1 SV=2	22.336	63.424	71.2316	35.9155	76.9011	41.437	72.3322	43.8579	78.028	19.309	7	779.156	12	483.127	156
P50914	60S ribosomal protein L14 OS=Homo sapiens GN=RPL14 PE=1 SV=4	23.417	68.682	52.5139	46.3969	41.1022	72.562	68.3791	49.3906	65.7632	11.115	0	592.329	7	464.79	157
Q9P0L0	Vesicle-associated membrane protein-associated protein A OS=Homo sapiens GN=VAPA PE=1 SV=3	27.875	51.8026	59.4494	65.0985	63.4048	42.6987	63.0596	59.2316	81.5836	14.849	1	431.02	12	486.329	158
P00367	Glutamate dehydrogenase 1, mitochondrial OS=Homo sapiens GN=GLUD1 PE=1 SV=2	61.359	77.2038	53.1736	50.3641	47.785	69.8845	62.7678	39.5242	51.4083	4.995	0	710.818	18	452.111	159
P07814	Bifunctional glutamate/proline--tRNA ligase OS=Homo sapiens GN=EPRS PE=1 SV=5	170.483	49.9159	45.8571	62.724	65.2051	46.9965	63.2874	59.8794	80.4838	1.208	1	644.394	31	474.349	160
P13645	Keratin, type I cytoskeletal 10 OS=Homo sapiens GN=KRT10 PE=1 SV=6	58.792	57.1448	49.7987	85.1853	57.2335	53.6347	40.7117	58.9344	69.7305	6.814	1	792.504	20	472.374	161
P07910-2	Isoform C1 of Heterogeneous nuclear ribonucleoproteins C1/C2 OS=Homo sapiens GN=HNRNPC	32.318	55.6497	59.2017	48.0382	77.716	38.433	65.1799	49.825	79.1364	9	0	607.977	14	473.18	162
O43143	Pre-mRNA-splicing factor ATP-dependent RNA helicase DHX15 OS=Homo sapiens GN=DHX15 PE=1 SV=2	90.875	54.2326	49.9726	56.5522	62.725	48.5649	61.2644	56.0334	81.4627	2.981	0	371.339	20	470.808	163
Q9NRG9	Aladin OS=Homo sapiens GN=AAAS PE=1 SV=1	59.536	64.3969	54.6502	53.8894	50.8873	58.0225	62.3389	48.9359	64.4389	5.898	0	1040.05	18	457.56	164
P18077	60S ribosomal protein L35a OS=Homo sapiens GN=RPL35A PE=1 SV=2	12.53	67.5386	52.5687	42.4108	38.1372	71.0318	65.5624	46.3575	65.3055	99	0	225.81	8	448.912	165
Q9NX58	Cell growth-regulating nucleolar protein OS=Homo sapiens GN=LYAR PE=1 SV=2	43.588	67.8839	51.6898	37.9907	35.7635	78.1688	66.6988	44.5387	58.4936	14.505	0	786.09	17	441.228	166
Q9NZ01	Very-long-chain enoyl-CoA reductase OS=Homo sapiens GN=TECR PE=1 SV=1	36.011	52.8154	54.6717	59.3794	56.9434	47.2406	60.6122	53.6303	80.3139	9	0	458.371	10	465.607	167
P22626	Heterogeneous nuclear ribonucleoproteins A2/B1 OS=Homo sapiens GN=HNRNPA2B1 PE=1 SV=2	37.407	56.591	55.2766	43.7664	67.1714	44.1542	69.4691	51.405	73.1077	15.238	1	890.36	14	460.941	168
Q14739	Lamin-B receptor OS=Homo sapiens GN=LBR PE=1 SV=2	70.658	44.9885	52.5591	57.8755	59.4124	38.4833	63.913	61.6398	91.6343	4.179	0	568.48	11	470.506	169
A0A0D9SF53	ATP-dependent RNA helicase DDX3X OS=Homo sapiens GN=DDX3X PE=1 SV=1	81.426	58.2103	46.855	49.9086	54.18	63.1456	60.4773	47.7343	67.3611	5.086	0	933.231	26	447.872	170
P22087	rRNA 2'-O-methyltransferase fibrillarin OS=Homo sapiens GN=FBL PE=1 SV=2	33.763	66.4731	53.0355	43.3648	47.1584	57.0949	65.883	48.6844	66.912	5.7	0	462.965	13	448.606	171
P62244	40S ribosomal protein S15a OS=Homo sapiens GN=RPS15A PE=1 SV=2	14.83	61.2636	48.9842	44.9307	41.3436	65.9529	66.0621	48.2119	66.8861	27.48	4	630.817	9	443.635	172
P49257	Protein ERGIC-53 OS=Homo sapiens GN=LMAN1 PE=1 SV=2	57.513	44.5253	59.2707	76.2941	70.1895	35.2153	54.7488	53.8132	70.4532	4.298	1	672.654	15	464.51	173
Q12905	Interleukin enhancer-binding factor 2 OS=Homo sapiens GN=ILF2 PE=1 SV=2	43.035	57.8544	50.4704	47.7849	50.0215	55.6913	62.4892	52.2205	72.0482	12.895	0	745.13	13	448.58	174
P13667	Protein disulfide-isomerase A4 OS=Homo sapiens GN=PDIA4 PE=1 SV=2	72.887	45.7087	43.2539	54.1508	62.8202	43.1198	59.3674	57.6414	90.6497	3.062	0	722.407	22	456.712	175
Q15084-2	Isoform 2 of Protein disulfide-isomerase A6 OS=Homo sapiens GN=PDIA6	53.867	43.3924	40.8555	56.3635	65.659	36.5228	56.2102	59.5669	104.501	5.629	0	1084.52	12	463.071	176
P62899	60S ribosomal protein L31 OS=Homo sapiens GN=RPL31 PE=1 SV=1	14.454	56.9911	49.7487	42.3164	37.7586	68.5404	65.1799	46.9849	67.793	137.95	0	532.512	7	435.313	177
P68431	Histone H3.1 OS=Homo sapiens GN=HIST1H3A PE=1 SV=2	15.394	55.7634	57.282	37.635	84.7509	31.0915	67.4107	49.3296	67.911	6.197	3	246.74	4	451.174	178
P60842	Eukaryotic initiation factor 4A-I OS=Homo sapiens GN=EIF4A1 PE=1 SV=1	46.125	50.9666	45.5665	57.3149	58.5533	51.6467	59.5178	51.9207	63.3707	3.642	3	394.559	14	438.857	179
P22695	Cytochrome b-c1 complex subunit 2, mitochondrial OS=Homo sapiens GN=UQCRC2 PE=1 SV=3	48.413	49.659	44.5733	47.6771	50.812	46.7982	66.827	54.3848	81.7506	9	0	1015.96	15	442.482	180
P46821	Microtubule-associated protein 1B OS=Homo sapiens GN=MAP1B PE=1 SV=2	270.468	55.9445	45.9047	57.3311	56.6711	52.4996	56.1682	49.576	60.961	1.049	0	1226.75	30	435.056	181
P05386	60S acidic ribosomal protein P1 OS=Homo sapiens GN=RPLP1 PE=1 SV=1	11.507	58.6756	44.559	38.2036	32.2604	70.5512	66.9928	49.1086	62.3026	157.489	0	1195.61	4	422.654	182
O00483	Cytochrome c oxidase subunit NDUFA4 OS=Homo sapiens GN=NDUFA4 PE=1 SV=1	9.364	59.2505	42.868	45.8713	49.634	53.4424	60.3115	51.5066	70.2315	30.623	0	275.693	4	433.116	183
B4DR61	Protein transport protein Sec61 subunit alpha isoform 1 OS=Homo sapiens GN=SEC61A1 PE=1 SV=1	52.915	47.3848	46.3929	44.9496	43.0353	52.7818	66.1063	56.2824	79.6777	4.78	6	528.74	11	436.611	184
Q96S52	GPI transamidase component PIG-S OS=Homo sapiens GN=PIGS PE=1 SV=3	61.617	42.7165	50.3037	58.3417	57.6077	40.247	60.8819	55.4161	78.1086	6.814	0	717.636	17	443.623	185
P11586	C-1-tetrahydrofolate synthase, cytoplasmic OS=Homo sapiens GN=MTHFD1 PE=1 SV=3	101.495	49.3347	44.8663	56.3392	64.9615	40.9198	53.849	50.5108	77.7257	4.012	0	730.974	34	438.507	186
Q9P035	Very-long-chain (3R)-3-hydroxyacyl-CoA dehydratase 3 OS=Homo sapiens GN=HACD3 PE=1 SV=2	43.132	47.1511	46.1881	57.0022	55.7101	44.885	57.5898	53.0232	71.5444	6.743	0	665.915	9	433.094	187
Q9P258	Protein RCC2 OS=Homo sapiens GN=RCC2 PE=1 SV=2	56.049	44.6769	46.1595	59.9966	65.566	36.4069	52.9403	52.8428	76.8936	5.225	0	689.76	19	435.483	188
O75396	Vesicle-trafficking protein SEC22b OS=Homo sapiens GN=SEC22B PE=1 SV=4	24.578	43.9041	49.1771	56.7462	54.9926	41.3317	60.1479	53.5312	70.4158	10.788	0	648.56	8	430.247	189
O60506	Heterogeneous nuclear ribonucleoprotein Q OS=Homo sapiens GN=SYNCRIP PE=1 SV=2	69.56	52.3332	45.0092	47.4075	53.6862	48.9402	58.7594	47.9452	63.9034	5.31	0	924.056	22	417.984	190
K7ELC2	40S ribosomal protein S15 OS=Homo sapiens GN=RPS15 PE=1 SV=1	17.712	55.7361	45.2497	41.2977	36.6558	63.8749	60.8045	45.4405	57.4572	36.276	0	340.43	5	406.516	191
P46776	60S ribosomal protein L27a OS=Homo sapiens GN=RPL27A PE=1 SV=2	16.551	59.7811	44.2304	40.1765	37.0013	60.2743	59.6062	44.5539	62.5329	99	0	800.135	7	408.157	192
P42766	60S ribosomal protein L35 OS=Homo sapiens GN=RPL35 PE=1 SV=2	14.543	60.6508	44.7805	37.2388	33.6089	63.4767	60.8885	42.4607	58.9284	67.129	0	300.385	6	402.033	193
Q9UBS4	DnaJ homolog subfamily B member 11 OS=Homo sapiens GN=DNAJB11 PE=1 SV=1	40.489	46.1109	40.9889	46.3079	49.4856	46.0552	57.7313	52.0553	72.742	11.328	0	657.085	15	411.477	194
Q9Y3I0	tRNA-splicing ligase RtcB homolog OS=Homo sapiens GN=RTCB PE=1 SV=1	55.175	54.6095	42.3679	43.2247	42.6434	58.9836	59.1928	44.1449	54.1808	2.981	0	558.265	14	399.348	195
P62266	40S ribosomal protein S23 OS=Homo sapiens GN=RPS23 PE=1 SV=3	15.798	56.212	45.3545	37.794	34.4327	60.9716	59.9644	42.1635	61.6491	41.17	0	588.704	7	398.542	196
P31689	DnaJ homolog subfamily A member 1 OS=Homo sapiens GN=DNAJA1 PE=1 SV=2	44.839	53.464	45.5546	47.7229	45.6726	50.8564	56.2544	45.0442	58.7787	8.006	0	554.542	17	403.348	197
Q9NSD9	Phenylalanine--tRNA ligase beta subunit OS=Homo sapiens GN=FARSB PE=1 SV=3	66.074	45.8161	43.6135	53.6091	58.2078	38.0332	51.3374	50.2822	70.4503	2.942	0	616.373	21	411.35	198
Q9BTX1	Nucleoporin NDC1 OS=Homo sapiens GN=NDC1 PE=1 SV=2	76.255	58.2145	48.4721	48.3347	45.9139	49.0684	53.5085	40.1821	56.438	13.065	0	1300.2	17	400.132	199
P61927	60S ribosomal protein L37 OS=Homo sapiens GN=RPL37 PE=1 SV=2	11.071	58.7557	46.2572	37.7697	31.9548	64.8407	54.6648	36.4149	60.8084	9	0	58.75	5	391.466	200
P25205	DNA replication licensing factor MCM3 OS=Homo sapiens GN=MCM3 PE=1 SV=3	90.924	45.776	44.2256	51.3613	56.0954	38.6313	51.5496	49.3576	70.4186	2.227	0	805.58	25	407.415	201
Q99729-3	Isoform 3 of Heterogeneous nuclear ribonucleoprotein A/B OS=Homo sapiens GN=HNRNPAB	30.569	50.3054	43.1133	38.6672	53.7725	42.923	56.6657	44.3329	72.7737	10.788	1	555.099	10	402.554	202
Q14152	Eukaryotic translation initiation factor 3 subunit A OS=Homo sapiens GN=EIF3A PE=1 SV=1	166.468	46.1403	40.9794	54.4526	52.1915	47.5122	54.0944	44.1551	61.0675	0.891	0	404.844	23	400.593	203
P02786	Transferrin receptor protein 1 OS=Homo sapiens GN=TFRC PE=1 SV=2	84.818	42.3206	47.3266	55.7436	55.2938	38.7167	54.4371	46.045	65.2853	1.7	0	632.62	17	405.169	204
J3KTA4	Probable ATP-dependent RNA helicase DDX5 OS=Homo sapiens GN=DDX5 PE=1 SV=1	69.044	69.0673	43.9898	34.3577	34.0872	65.8323	52.4384	35.005	46.6751	22.52	0	1293.22	27	381.453	205
P05023	Sodium/potassium-transporting ATPase subunit alpha-1 OS=Homo sapiens GN=ATP1A1 PE=1 SV=1	112.824	41.9647	43.242	56.4039	57.0431	36.3199	52.2881	48.4939	69.5578	3.125	0	1001.35	25	405.313	206
P84098	60S ribosomal protein L19 OS=Homo sapiens GN=RPL19 PE=1 SV=1	23.451	52.7544	44.0946	39.0607	39.0407	57.9614	58.147	39.1787	56.2105	26.826	0	704.734	6	386.448	207
Q3ZCQ8-2	Isoform 2 of Mitochondrial import inner membrane translocase subunit TIM50 OS=Homo sapiens GN=TIMM50	50.433	55.3486	43.1991	44.389	44.479	51.1204	52.8076	39.735	56.6395	4.754	0	635.025	12	387.718	208
P08195-4	Isoform 4 of 4F2 cell-surface antigen heavy chain OS=Homo sapiens GN=SLC3A2	71.079	40.4865	44.5138	52.1968	58.3052	34.5852	50.2164	50.6023	70.5424	3.037	0	537.982	14	401.449	209
P00492	Hypoxanthine-guanine phosphoribosyltransferase OS=Homo sapiens GN=HPRT1 PE=1 SV=2	24.564	35.2433	40.3696	62.4734	55.761	30.2493	46.5021	55.3958	75.4426	23.245	0	531.131	10	401.437	210
O60313-2	Isoform 2 of Dynamin-like 120 kDa protein, mitochondrial OS=Homo sapiens GN=OPA1	115.812	43.8346	39.6718	50.0218	55.6259	39.7466	49.9091	48.1306	63.4312	2.325	0	881.307	28	390.372	211
Q9Y4R8	Telomere length regulation protein TEL2 homolog OS=Homo sapiens GN=TELO2 PE=1 SV=2	91.689	48.6567	43.3063	48.3589	47.2957	45.8126	50.3624	43.045	56.2624	1.448	0	352.22	18	383.1	212
Q99832	T-complex protein 1 subunit eta OS=Homo sapiens GN=CCT7 PE=1 SV=2	59.329	42.1521	38.6691	54.8165	59.5209	36.4481	48.2974	46.5963	60.4226	3.084	0	709	18	386.923	213
O95831	Apoptosis-inducing factor 1, mitochondrial OS=Homo sapiens GN=AIFM1 PE=1 SV=1	66.859	50.2275	36.0445	41.6049	44.3307	46.8546	50.6962	47.2898	62.1961	3.642	0	623.76	16	379.244	214
O00159	Unconventional myosin-Ic OS=Homo sapiens GN=MYO1C PE=1 SV=4	121.606	45.5339	41.539	43.2139	44.1823	45.007	50.579	45.9892	63.4283	2.271	0	763.79	29	379.473	215
A0A087WV73	Probable 28S rRNA (cytosine(4447)-C(5))-methyltransferase OS=Homo sapiens GN=NOP2 PE=1 SV=1	94.038	55.3297	43.966	38.0904	39.2621	48.7083	50.3602	39.5496	55.1856	2.325	0	682.678	17	370.452	216
Q07021	Complement component 1 Q subcomponent-binding protein, mitochondrial OS=Homo sapiens GN=C1QBP PE=1 SV=1	31.343	40.2528	40.4101	43.5535	47.7983	34.5944	50.946	48.9029	77.9445	4.412	0	838.494	5	384.402	217
Q07065	Cytoskeleton-associated protein 4 OS=Homo sapiens GN=CKAP4 PE=1 SV=2	65.983	34.1673	34.9894	41.2815	44.2443	38.4269	54.5918	54.4711	79.6172	4.036	0	1006.86	25	381.79	218
Q9Y3U8	60S ribosomal protein L36 OS=Homo sapiens GN=RPL36 PE=1 SV=3	12.246	51.7394	41.1461	35.4438	34.3685	55.9369	55.1866	41.0255	48.44	45.416	0	438.813	5	363.287	219
Q10471	Polypeptide N-acetylgalactosaminyltransferase 2 OS=Homo sapiens GN=GALNT2 PE=1 SV=1	64.691	34.0009	39.3598	48.7039	47.8537	33.6683	52.0382	53.0613	74.6249	3.084	1	368.428	13	383.311	220
P10606	Cytochrome c oxidase subunit 5B, mitochondrial OS=Homo sapiens GN=COX5B PE=1 SV=2	13.687	37.0458	38.1428	40.7775	43.6243	34.5456	62.9071	52.8149	68.4119	9	0	287.9	6	378.27	221
P11387	DNA topoisomerase 1 OS=Homo sapiens GN=TOP1 PE=1 SV=2	90.669	50.8361	43.7897	38.5863	43.9188	46.8622	53.1127	35.066	50.7087	2.086	0	340.77	19	362.881	222
P48444	Coatomer subunit delta OS=Homo sapiens GN=ARCN1 PE=1 SV=1	57.174	41.8005	39.0549	49.7442	42.4308	42.9703	51.5408	44.0408	57.3017	6.943	0	514.2	20	368.884	223
P14174	Macrophage migration inhibitory factor OS=Homo sapiens GN=MIF PE=1 SV=4	12.468	39.1704	39.105	51.8384	53.602	33.7888	48.8899	45.1102	61.7959	1777.28	0	1260.03	5	373.301	224
Q14974	Importin subunit beta-1 OS=Homo sapiens GN=KPNB1 PE=1 SV=2	97.108	40.5518	37.826	48.8009	53.2057	36.6983	44.9766	43.4743	66.2699	2.001	0	471.056	19	371.803	225
Q9UQ80	Proliferation-associated protein 2G4 OS=Homo sapiens GN=PA2G4 PE=1 SV=3	43.759	40.8887	33.0579	43.8688	41.4122	54.7911	48.6334	39.6817	55.0215	8.12	0	651.594	15	357.355	226
P20700	Lamin-B1 OS=Homo sapiens GN=LMNB1 PE=1 SV=2	66.368	55.9298	46.724	38.6861	40.7678	44.0794	51.8017	34.6036	45.3421	6.444	1	780.803	26	357.935	227
J3KNL6	Protein transport protein Sec16A OS=Homo sapiens GN=SEC16A PE=1 SV=1	251.738	44.3631	37.7998	43.6047	41.8019	49.2987	50.5879	39.8671	50.3142	1.972	0	810.49	38	357.637	228
Q9ULX6	A-kinase anchor protein 8-like OS=Homo sapiens GN=AKAP8L PE=1 SV=3	71.604	44.2978	39.2502	50.9166	46.7332	44.3174	46.155	40.8959	48.2932	6.356	0	707.09	18	360.859	229
P61513	60S ribosomal protein L37a OS=Homo sapiens GN=RPL37A PE=1 SV=2	10.268	47.9281	39.286	35.4411	34.477	54.0283	51.1738	38.6376	53.3747	45.416	0	858.869	4	354.346	230
Q14204	Cytoplasmic dynein 1 heavy chain 1 OS=Homo sapiens GN=DYNC1H1 PE=1 SV=5	532.072	41.8131	37.3639	48.27	49.5011	39.5742	47.4196	43.2457	56.605	0.58	0	893.494	57	363.793	231
Q9BSJ8-2	Isoform 2 of Extended synaptotagmin-1 OS=Homo sapiens GN=ESYT1	123.925	38.9788	39.3241	47.3644	47.6832	36.8859	49.279	44.8181	60.5521	1.921	1	830.949	21	364.886	232
Q92598	Heat shock protein 105 kDa OS=Homo sapiens GN=HSPH1 PE=1 SV=1	96.804	42.5838	34.8322	38.9286	45.1721	40.8801	48.8236	44.3685	63.9609	2.035	1	575.794	22	359.55	233
P41252	Isoleucine--tRNA ligase, cytoplasmic OS=Homo sapiens GN=IARS PE=1 SV=2	144.406	39.1136	36.4494	46.8443	48.8944	36.7959	45.9184	43.5784	58.1337	1.412	0	511.82	24	355.728	234
O75844	CAAX prenyl protease 1 homolog OS=Homo sapiens GN=ZMPSTE24 PE=1 SV=2	54.778	36.8162	40.634	48.2592	48.994	29.3278	45.6111	44.8511	67.053	10.053	0	652.145	13	361.547	235
Q9UJZ1	Stomatin-like protein 2, mitochondrial OS=Homo sapiens GN=STOML2 PE=1 SV=1	38.51	35.6265	40.7626	46.5181	48.2434	31.2593	45.7592	43.8172	65.9907	11.589	0	824.465	14	357.977	236
Q8N766	ER membrane protein complex subunit 1 OS=Homo sapiens GN=EMC1 PE=1 SV=1	111.689	36.1256	37.3377	44.1734	47.1296	32.5317	46.1904	45.8266	65.9763	1.745	0	645.79	19	355.291	237
P42166	Lamina-associated polypeptide 2, isoform alpha OS=Homo sapiens GN=TMPO PE=1 SV=2	75.446	39.4673	36.5875	44.1087	47.7319	33.3205	44.7643	41.7875	63.2815	3.217	6	590.468	21	351.049	238
Q8TCT9	Minor histocompatibility antigen H13 OS=Homo sapiens GN=HM13 PE=1 SV=1	41.462	30.358	36.216	46.3322	48.8412	27.021	46.9996	49.9469	72.0511	6.499	0	316.094	8	357.766	239
P56192	Methionine--tRNA ligase, cytoplasmic OS=Homo sapiens GN=MARS PE=1 SV=2	101.052	42.5796	36.6423	45.0655	45.9139	37.1667	44.1055	40.6292	54.486	3.062	0	543.3	21	346.589	240
P14618	Pyruvate kinase PKM OS=Homo sapiens GN=PKM PE=1 SV=4	57.9	30.0801	26.9441	48.6716	66.0377	30.5819	45.6885	45.1636	57.46	3.184	0	639.235	18	350.627	241
P35606	Coatomer subunit beta' OS=Homo sapiens GN=COPB2 PE=1 SV=2	102.422	33.485	36.0016	47.1111	39.1049	36.1124	49.8295	46.8224	60.3161	2.295	0	689.365	21	348.783	242
O75489	NADH dehydrogenase [ubiquinone] iron-sulfur protein 3, mitochondrial OS=Homo sapiens GN=NDUFS3 PE=1 SV=1	30.223	38.1239	35.3371	39.9797	41.6646	35.0231	52.1333	44.2567	61.0243	6.079	0	475.84	12	347.543	243
Q15366-3	Isoform 3 of Poly(rC)-binding protein 2 OS=Homo sapiens GN=PCBP2	38.197	35.5065	34.4773	44.2192	51.866	30.4995	42.9713	44.8791	64.4792	13.125	5	939.744	13	348.898	244
Q92643	GPI-anchor transamidase OS=Homo sapiens GN=PIGK PE=1 SV=2	45.223	32.3395	38.3881	42.7315	46.0711	30.8718	46.8735	43.5734	63.483	3.786	0	469.984	11	344.332	245
P52701	DNA mismatch repair protein Msh6 OS=Homo sapiens GN=MSH6 PE=1 SV=2	152.689	43.205	36.3589	42.559	41.286	40.4896	43.9021	36.9102	50.2567	1.818	0	799.202	31	334.967	246
P48047	ATP synthase subunit O, mitochondrial OS=Homo sapiens GN=ATP5O PE=1 SV=1	23.263	37.469	33.7581	38.9394	42.8183	38.2011	47.2185	40.2964	58.5426	15.379	0	700.88	7	337.243	247
Q92621	Nuclear pore complex protein Nup205 OS=Homo sapiens GN=NUP205 PE=1 SV=3	227.776	44.2915	37.5497	40.0525	37.2803	42.7353	45.0982	37.0271	48.1031	0.66	0	372.72	24	332.138	248
O14967	Calmegin OS=Homo sapiens GN=CLGN PE=1 SV=1	69.994	41.0424	36.6494	34.9398	33.3477	42.7231	47.0062	36.8289	58.9572	4.52	0	317.68	19	331.495	249
Q15363	Transmembrane emp24 domain-containing protein 2 OS=Homo sapiens GN=TMED2 PE=1 SV=1	22.746	51.8826	75.9354	69.9362	58.6928	16.1949	21.6824	20.2638	27.9412	30.623	0	748.459	5	342.529	250
H7BY58	Protein-L-isoaspartate O-methyltransferase OS=Homo sapiens GN=PCMT1 PE=1 SV=1	30.339	32.6027	33.1579	47.5288	50.7832	28.6916	42.0648	41.9958	61.9427	6.627	0	431.484	11	338.768	251
Q13310-3	Isoform 3 of Polyadenylate-binding protein 4 OS=Homo sapiens GN=PABPC4	72.345	39.3242	36.5161	41.1279	37.6058	42.0579	43.8557	36.4149	50.9937	6.602	0	1185.24	23	327.896	252
A0A087WVQ6	Clathrin heavy chain OS=Homo sapiens GN=CLTC PE=1 SV=1	191.936	34.3884	30.3356	44.4213	48.1282	32.0053	43.7053	42.9662	58.9456	0.878	0	547.752	25	334.896	253
Q9UBF2	Coatomer subunit gamma-2 OS=Homo sapiens GN=COPG2 PE=1 SV=1	97.56	35.9319	36.5637	43.8149	39.22	36.0545	44.2956	39.232	49.5858	1.884	2	615.075	19	324.698	254
O60884	DnaJ homolog subfamily A member 2 OS=Homo sapiens GN=DNAJA2 PE=1 SV=1	45.717	40.7518	33.8581	36.7806	36.9061	40.5475	42.9072	35.7976	47.5158	5.19	0	593.985	12	315.065	255
Q9Y224	UPF0568 protein C14orf166 OS=Homo sapiens GN=C14orf166 PE=1 SV=1	28.051	40.2338	32.4053	34.9371	34.3197	43.8094	43.7672	34.2861	47.415	4.275	0	327.537	12	311.174	256
J3KQN4	60S ribosomal protein L36a OS=Homo sapiens GN=RPL36A PE=3 SV=1	16.368	41.771	35.6253	31.428	28.113	49.6008	45.5514	31.5248	39.8316	30.623	5	248.046	5	303.446	257
Q9UBV2	Protein sel-1 homolog 1 OS=Homo sapiens GN=SEL1L PE=1 SV=3	88.698	36.3088	39.2479	36.9962	31.6072	31.328	48.6489	41.724	51.2413	2.639	0	750.6	16	317.102	258
Q9UGP8	Translocation protein SEC63 homolog OS=Homo sapiens GN=SEC63 PE=1 SV=2	87.942	33.8704	34.2773	38.2171	39.499	31.3356	44.9456	40.9797	53.8123	2.34	0	575.55	16	316.937	259
P61978-2	Isoform 2 of Heterogeneous nuclear ribonucleoprotein K OS=Homo sapiens GN=HNRNPK	50.996	37.0373	32.9935	35.7618	40.5198	35.6791	42.4716	36.0999	51.7826	4.843	0	703.285	17	312.346	260
Q13438	Protein OS-9 OS=Homo sapiens GN=OS9 PE=1 SV=1	75.515	35.8434	37.7188	37.8748	33.248	30.884	49.0292	42.5217	45.5178	2.793	14	463.373	18	312.638	261
P15924	Desmoplakin OS=Homo sapiens GN=DSP PE=1 SV=3	331.569	35.4075	32.0433	40.2169	42.3555	33.7522	39.9247	36.0414	49.6406	0.46	0	529.546	33	309.382	262
P47756-2	Isoform 2 of F-actin-capping protein subunit beta OS=Homo sapiens GN=CAPZB	30.609	33.3713	31.9146	43.2382	46.4808	27.2422	39.6527	38.945	52.891	4.456	0	347.553	10	313.736	263
P38646	Stress-70 protein, mitochondrial OS=Homo sapiens GN=HSPA9 PE=1 SV=2	73.635	41.5562	28.223	33.6596	45.3094	33.1969	40.5481	32.1345	51.4975	3.108	0	682.854	21	306.125	264
P35268	60S ribosomal protein L22 OS=Homo sapiens GN=RPL22 PE=1 SV=2	14.778	38.9872	32.6077	30.067	27.338	46.937	43.1526	34.0524	44.4986	67.129	0	991.306	5	297.64	265
Q8TDN6	Ribosome biogenesis protein BRX1 homolog OS=Homo sapiens GN=BRIX1 PE=1 SV=2	41.375	43.4198	32.7435	28.4796	30.5798	42.0396	41.9078	32.6502	47.5043	2.162	0	162.04	7	299.324	266
P21796	Voltage-dependent anion-selective channel protein 1 OS=Homo sapiens GN=VDAC1 PE=1 SV=2	30.754	28.3092	31.4978	38.4624	39.313	27.883	44.1409	40.7536	61.5512	11.915	1	652.362	14	311.911	267
Q9BZE4	Nucleolar GTP-binding protein 1 OS=Homo sapiens GN=GTPBP4 PE=1 SV=3	73.918	44.9548	32.5315	29.9295	30.5643	45.6066	40.7935	29.015	41.8642	2.162	0	293.934	18	295.26	268
F8VW96	Cysteine and glycine-rich protein 2 OS=Homo sapiens GN=CSRP2 PE=1 SV=1	26.719	36.6162	34.1225	45.7204	49.583	24.0719	35.8588	35.4521	49.4707	10.45	0	688.698	10	310.896	269
A6NHL2	Tubulin alpha chain-like 3 OS=Homo sapiens GN=TUBAL3 PE=1 SV=2	49.877	40.5328	36.2398	32.1962	29.3641	43.1259	40.0639	31.662	44.441	5.422	0	1479.96	6	297.626	270
Q92499	ATP-dependent RNA helicase DDX1 OS=Homo sapiens GN=DDX1 PE=1 SV=2	82.38	39.1115	32.148	33.0721	32.6369	41.9771	43.0045	33.8466	41.4871	2.942	0	573.68	21	297.284	271
O75964	ATP synthase subunit g, mitochondrial OS=Homo sapiens GN=ATP5L PE=1 SV=3	11.421	37.9217	31.3526	34.1151	35.4358	35.2993	42.8386	33.3843	49.3066	16.783	0	330.876	5	299.654	272
Q8TCJ2	Dolichyl-diphosphooligosaccharide--protein glycosyltransferase subunit STT3B OS=Homo sapiens GN=STT3B PE=1 SV=1	93.614	29.4778	33.1984	42.6102	39.2599	26.5404	43.1946	36.6816	55.9284	1.834	0	457.51	12	306.891	273
P63151	Serine/threonine-protein phosphatase 2A 55 kDa regulatory subunit B alpha isoform OS=Homo sapiens GN=PPP2R2A PE=1 SV=1	51.659	33.624	32.8316	43.9335	48.6619	25.1841	34.9302	34.0702	51.4457	5.105	0	489.362	18	304.681	274
P35080	Profilin-2 OS=Homo sapiens GN=PFN2 PE=1 SV=3	15.036	31.5204	32.2409	42.9713	44.541	25.4374	37.8663	37.9365	51.5666	73.989	6	686.89	8	304.08	275
Q5JWF2	Guanine nucleotide-binding protein G(s) subunit alpha isoforms XLas OS=Homo sapiens GN=GNAS PE=1 SV=2	110.956	34.5105	32.6149	40.6562	43.1704	29.134	37.6319	36.0338	46.5888	0.863	0	355.46	8	300.341	276
Q96DA6	Mitochondrial import inner membrane translocase subunit TIM14 OS=Homo sapiens GN=DNAJC19 PE=1 SV=3	12.491	37.6543	33.0078	29.2558	29.4039	40.1219	40.4066	33.6942	48.5868	6.943	0	162.636	7	292.131	277
P48643	T-complex protein 1 subunit epsilon OS=Homo sapiens GN=CCT5 PE=1 SV=1	59.633	31.3372	28.2183	41.6777	43.6841	28.507	39.5797	37.055	49.3814	2.36	0	444.336	17	299.44	278
Q9BVP2	Guanine nucleotide-binding protein-like 3 OS=Homo sapiens GN=GNL3 PE=1 SV=2	61.954	41.4235	31.8289	29.28	30.4403	39.3941	41.2114	32.0684	44.4525	4.623	0	693.287	18	290.099	279
B0QZ18	Copine-1 OS=Homo sapiens GN=CPNE1 PE=1 SV=1	59.68	41.9963	31.5622	31.393	30.5709	40.8389	39.5156	30.0235	42.751	2.162	0	294.338	10	288.651	280
Q9HD20	Manganese-transporting ATPase 13A1 OS=Homo sapiens GN=ATP13A1 PE=1 SV=2	132.87	30.7118	33.2508	36.6324	38.2524	28.3911	40.7228	38.1676	52.7614	1.209	0	504.38	19	298.89	281
Q16795	NADH dehydrogenase [ubiquinone] 1 alpha subcomplex subunit 9, mitochondrial OS=Homo sapiens GN=NDUFA9 PE=1 SV=2	42.483	31.9563	29.9402	33.5168	35.8786	29.8603	43.7164	37.7358	53.7	2.728	0	406.11	12	296.304	282
P53007	Tricarboxylate transport protein, mitochondrial OS=Homo sapiens GN=SLC25A1 PE=1 SV=2	33.991	33.9377	29.9759	32.9778	37.9867	30.4095	40.2629	37.3192	51.5033	9	0	422.355	10	294.373	283
Q9P2J5	Leucine--tRNA ligase, cytoplasmic OS=Homo sapiens GN=LARS PE=1 SV=2	134.379	31.2298	29.271	40.702	40.8564	30.1578	38.6976	37.243	46.3124	1.207	0	681.54	20	294.47	284
Q9HD45	Transmembrane 9 superfamily member 3 OS=Homo sapiens GN=TM9SF3 PE=1 SV=2	67.843	35.9698	41.6367	47.1704	43.1172	22.0977	34.97	30.7678	38.7894	3.125	0	325.045	11	294.519	285
Q9H3K6	BolA-like protein 2 OS=Homo sapiens GN=BOLA2 PE=1 SV=1	10.11	29.5768	29.4782	38.2656	41.6514	27.5214	37.2119	36.7426	53.1127	50.795	0	470.863	6	293.56	286
P62979	Ubiquitin-40S ribosomal protein S27a OS=Homo sapiens GN=RPS27A PE=1 SV=2	17.953	36.9279	31.655	31.2825	26.3216	38.3902	40.9284	32.0075	44.9621	11.328	4	559.939	6	282.475	287
H0UI06	Cytochrome c oxidase subunit 7A2, mitochondrial OS=Homo sapiens GN=COX7A2 PE=1 SV=1	12.836	28.2586	30.407	30.3123	31.8308	23.602	48.2023	42.288	58.8564	2.162	0	182.9	2	293.757	288
Q8NBS9	Thioredoxin domain-containing protein 5 OS=Homo sapiens GN=TXNDC5 PE=1 SV=2	47.599	29.1746	26.1891	37.5352	43.0685	23.3747	36.3783	39.7909	58.2403	4.055	0	432.483	13	293.752	289
P40939	Trifunctional enzyme subunit alpha, mitochondrial OS=Homo sapiens GN=HADHA PE=1 SV=2	82.947	34.2789	31.274	35.2012	33.9455	31.9321	39.9291	32.325	43.0907	1.929	0	562.12	17	281.977	290
O43175	D-3-phosphoglycerate dehydrogenase OS=Homo sapiens GN=PHGDH PE=1 SV=4	56.614	29.3747	29.3091	37.6134	41.7333	26.4321	36.6282	36.9839	47.8325	6.667	0	608.536	17	285.907	291
O75306	NADH dehydrogenase [ubiquinone] iron-sulfur protein 2, mitochondrial OS=Homo sapiens GN=NDUFS2 PE=1 SV=2	52.512	30.9687	29.028	33.4117	35.5509	28.7465	40.5526	35.1168	49.7816	2.03	0	378.724	9	283.157	292
Q86Y56	Dynein assembly factor 5, axonemal OS=Homo sapiens GN=DNAAF5 PE=1 SV=4	93.462	33.5629	30.9953	37.414	39.561	28.5528	34.7644	32.9169	43.8076	1.7	0	611.333	22	281.575	293
Q96HS1	Serine/threonine-protein phosphatase PGAM5, mitochondrial OS=Homo sapiens GN=PGAM5 PE=1 SV=2	31.985	36.1572	28.3683	31.3229	31.9039	34.2191	39.0204	33.0617	41.1819	5.952	0	388.469	10	275.235	294
A8MXP9	Matrin-3 OS=Homo sapiens GN=MATR3 PE=1 SV=1	99.905	33.2871	29.7687	32.1746	36.5119	29.9015	39.5046	31.3749	43.8997	1.649	0	482.328	18	276.423	295
O95573	Long-chain-fatty-acid--CoA ligase 3 OS=Homo sapiens GN=ACSL3 PE=1 SV=3	80.368	32.4743	29.5068	33.4278	33.3277	32.2845	38.6158	31.7687	43.3844	1.661	2	424.742	15	274.79	296
O43292	Glycosylphosphatidylinositol anchor attachment 1 protein OS=Homo sapiens GN=GPAA1 PE=1 SV=3	67.58	25.7149	31.2978	35.2578	36.5983	23.721	36.5773	34.9491	57.3823	2.775	0	276.244	13	281.499	297
O14979-2	Isoform 2 of Heterogeneous nuclear ribonucleoprotein D-like OS=Homo sapiens GN=HNRNPDL	33.568	35.9719	29.6616	27.8273	37.1851	30.7162	36.3872	30.0286	44.1473	7.577	1	426.569	8	271.925	298
Q6P2Q9	Pre-mRNA-processing-splicing factor 8 OS=Homo sapiens GN=PRPF8 PE=1 SV=2	273.427	34.0241	31.7408	32.5897	34.663	31.2791	36.2921	30.1124	40.6867	0.479	0	301.739	23	271.388	299
P62854	40S ribosomal protein S26 OS=Homo sapiens GN=RPS26 PE=1 SV=3	13.007	37.5427	30.4832	24.833	21.3416	42.1952	40.484	29.3249	36.9641	30.623	0	343.033	4	263.169	300
H0YA96	Heterogeneous nuclear ribonucleoprotein D0 (Fragment) OS=Homo sapiens GN=HNRNPD PE=1 SV=1	23.906	35.3423	30.0403	27.6845	32.7609	32.6644	37.8641	31.2505	40.4564	7.483	0	472.528	8	268.063	301
O95563	Mitochondrial pyruvate carrier 2 OS=Homo sapiens GN=MPC2 PE=1 SV=1	14.27	31.6404	28.2707	31.7353	34.0009	29.2378	36.8802	32.2132	48.1981	9	0	130.79	5	272.177	302
O43390	Heterogeneous nuclear ribonucleoprotein R OS=Homo sapiens GN=HNRNPR PE=1 SV=1	70.899	36.9068	29.9235	26.2507	30.6528	31.3997	37.8376	29.1344	43.8134	3.307	3	500.06	23	265.919	303
P04406	Glyceraldehyde-3-phosphate dehydrogenase OS=Homo sapiens GN=GAPDH PE=1 SV=3	36.03	26.7825	25.9485	35.8535	40.9738	27.3643	39.2194	30.6103	41.4468	5.449	0	558.613	12	268.199	304
Q86XR7-2	Isoform 2 of TIR domain-containing adapter molecule 2 OS=Homo sapiens GN=TICAM2	46.143	42.5817	57.232	64.3842	53.9453	11.296	14.3731	12.9173	16.2897	2.481	0	483.378	8	273.019	305
E9PI68	Signal peptidase complex subunit 2 OS=Homo sapiens GN=SPCS2 PE=1 SV=1	28.485	26.791	29.8426	35.557	35.9583	22.444	35.1999	35.2692	50.7231	3.217	0	255.874	8	271.785	306
Q9NYU2	UDP-glucose:glycoprotein glucosyltransferase 1 OS=Homo sapiens GN=UGGT1 PE=1 SV=3	177.078	32.6069	27.3751	31.6841	35.1479	28.7801	34.2581	30.4325	45.1895	0.851	0	453.097	19	265.474	307
P35998	26S protease regulatory subunit 7 OS=Homo sapiens GN=PSMC2 PE=1 SV=3	48.603	30.6381	27.0917	33.4871	30.6174	32.4905	37.1013	31.1336	38.5418	4.125	0	519.31	16	261.102	308
Q9HC38-2	Isoform 2 of Glyoxalase domain-containing protein 4 OS=Homo sapiens GN=GLOD4	33.212	27.9238	27.9253	33.3928	42.3533	22.6027	33.3715	32.9906	47.084	9	0	597.281	15	267.644	309
Q2NL82	Pre-rRNA-processing protein TSR1 homolog OS=Homo sapiens GN=TSR1 PE=1 SV=1	91.752	33.942	28.535	28.935	27.7078	36.6189	35.3989	28.6188	37.6004	1.482	0	396.37	11	257.357	310
O43852-3	Isoform 3 of Calumenin OS=Homo sapiens GN=CALU	38.027	19.0609	26.3463	31.1208	37.9047	19.1288	35.8964	40.7714	61.77	6.743	4	363.257	12	271.999	311
P17987	T-complex protein 1 subunit alpha OS=Homo sapiens GN=TCP1 PE=1 SV=1	60.306	29.9137	26.039	34.0585	34.6187	29.9869	34.5964	29.6806	38.8614	3.354	0	591.213	18	257.755	312
P07237	Protein disulfide-isomerase OS=Homo sapiens GN=P4HB PE=1 SV=3	57.081	26.4688	26.1581	31.2502	33.6887	27.4162	34.0259	32.3631	48.9122	3.467	4	624.826	17	260.283	313
Q7Z7L1	Schlafen family member 11 OS=Homo sapiens GN=SLFN11 PE=1 SV=2	102.77	29.6968	25.9676	30.04	31.9283	31.7414	35.6996	30.2115	39.8115	1.963	0	658.913	21	255.097	314
Q99805	Transmembrane 9 superfamily member 2 OS=Homo sapiens GN=TM9SF2 PE=1 SV=1	75.725	26.8268	30.6214	34.1474	35.5044	22.5386	34.5057	32.5257	44.8037	2.594	0	549.24	9	261.474	315
P00403	Cytochrome c oxidase subunit 2 OS=Homo sapiens GN=MT-CO2 PE=1 SV=1	25.548	25.955	27.3394	28.2747	30.5953	22.5951	39.8053	37.1211	48.7193	20.544	0	419.759	6	260.405	316
Q8NF37	Lysophosphatidylcholine acyltransferase 1 OS=Homo sapiens GN=LPCAT1 PE=1 SV=2	59.113	26.5614	27.3347	28.962	28.6954	31.6178	36.0976	29.8813	43.7961	4.055	0	350.915	13	252.946	317
P62263	40S ribosomal protein S14 OS=Homo sapiens GN=RPS14 PE=1 SV=3	16.263	32.2258	28.0706	26.0458	25.6307	35.1879	35.6819	29.3402	36.4833	36.276	0	838.211	5	248.666	318
P61289-2	Isoform 2 of Proteasome activator complex subunit 3 OS=Homo sapiens GN=PSME3	30.867	25.6033	25.9342	35.4546	40.0792	21.0892	30.4619	33.5697	47.2049	1.239	0	241.315	6	259.397	319
P62857	40S ribosomal protein S28 OS=Homo sapiens GN=RPS28 PE=1 SV=1	7.836	33.1397	27.7395	23.7146	23.1884	39.1714	38.8059	24.3816	31.468	20.544	0	245.02	2	241.609	320
H7C2Q8	EBNA1 binding protein 2, isoform CRA_d OS=Homo sapiens GN=EBNA1BP2 PE=1 SV=1	40.659	37.3258	27.3751	22.2673	22.7123	36.9637	34.5521	26.6627	34.8998	3.642	0	421.429	13	242.759	321
P13073	Cytochrome c oxidase subunit 4 isoform 1, mitochondrial OS=Homo sapiens GN=COX4I1 PE=1 SV=1	19.564	26.3235	26.9965	28.4796	30.6063	22.7507	39.6394	33.8847	45.512	11.115	0	446.09	7	254.193	322
Q15006	ER membrane protein complex subunit 2 OS=Homo sapiens GN=EMC2 PE=1 SV=1	34.811	23.5061	25.9842	33.285	33.4562	22.0275	33.8867	34.1667	48.0916	5.661	0	446.358	10	254.404	323
A0A0U1RRH7	Histone H2A OS=Homo sapiens PE=3 SV=1	18.541	29.2968	32.029	20.227	43.7904	16.7655	39.6549	26.2385	44.464	9	0	535.017	4	252.466	324
Q9H0D6	5'-3' exoribonuclease 2 OS=Homo sapiens GN=XRN2 PE=1 SV=1	108.513	32.3248	27.1751	27.6036	27.8495	30.9084	33.2809	26.9828	39.5092	1.069	0	304.923	16	245.634	325
Q969X5	Endoplasmic reticulum-Golgi intermediate compartment protein 1 OS=Homo sapiens GN=ERGIC1 PE=1 SV=1	32.571	23.8072	29.8307	37.3196	34.5522	20.0121	33.4622	32.9067	40.3355	4.179	0	282.343	8	252.226	326
Q9H3N1	Thioredoxin-related transmembrane protein 1 OS=Homo sapiens GN=TMX1 PE=1 SV=1	31.771	24.3399	25.0959	41.7019	38.7262	21.91	30.4045	31.7941	35.9046	4.623	0	157.64	7	249.877	327
P09669	Cytochrome c oxidase subunit 6C OS=Homo sapiens GN=COX6C PE=1 SV=2	8.776	25.1948	25.3388	26.2183	26.9195	23.9987	40.7206	32.8686	45.2702	13.678	0	115.124	6	246.529	328
Q14684	Ribosomal RNA processing protein 1 homolog B OS=Homo sapiens GN=RRP1B PE=1 SV=3	84.375	36.2961	29.6639	26.8382	27.989	28.0539	29.6262	26.9752	35.5735	1.728	0	374.071	16	241.016	329
P50990	T-complex protein 1 subunit theta OS=Homo sapiens GN=CCT8 PE=1 SV=4	59.583	26.1171	24.2361	34.7269	37.5039	22.5691	31.1739	30.4808	39.1464	1.456	0	329.905	16	245.954	330
Q96PK6	RNA-binding protein 14 OS=Homo sapiens GN=RBM14 PE=1 SV=2	69.449	44.4895	28.6565	19.75	18.2792	45.0269	28.9762	19.0114	22.8222	4.623	0	329.515	16	227.012	331
M0QXB4	Coatomer protein complex, subunit epsilon, isoform CRA_g OS=Homo sapiens GN=COPE PE=1 SV=1	36.901	23.3355	24.4623	32.808	28.6865	24.6227	35.8101	32.8636	42.1953	3.16	0	368.001	9	244.784	332
O94822-3	Isoform 3 of E3 ubiquitin-protein ligase listerin OS=Homo sapiens GN=LTN1	205.046	31.792	27.5895	29.0348	27.8473	29.9457	31.479	25.1411	34.1426	0.859	0	508.815	24	236.972	333
E7ETB3	Aspartyl aminopeptidase OS=Homo sapiens GN=DNPEP PE=1 SV=2	54.468	26.3677	26.3629	33.5033	35.4025	22.322	30.1458	29.5688	39.3911	1.783	0	289.222	8	243.064	334
P55209	Nucleosome assembly protein 1-like 1 OS=Homo sapiens GN=NAP1L1 PE=1 SV=1	45.346	28.4418	24.0598	27.6144	29.2556	29.6268	32.297	27.4934	39.3076	6.356	6	395.83	8	238.097	335
P31930	Cytochrome b-c1 complex subunit 1, mitochondrial OS=Homo sapiens GN=UQCRC1 PE=1 SV=3	52.612	23.9651	23.9288	28.0618	29.9907	22.2106	36.9222	33.209	44.8988	4.754	0	811.97	14	243.187	336
Q9UBM7	7-dehydrocholesterol reductase OS=Homo sapiens GN=DHCR7 PE=1 SV=1	54.454	25.4665	29.4686	30.9672	32.1563	19.736	31.5652	30.2598	44.7519	4.275	0	371.591	8	244.371	337
Q96CT7	Coiled-coil domain-containing protein 124 OS=Homo sapiens GN=CCDC124 PE=1 SV=1	25.82	25.1443	23.3025	26.5984	27.5882	33.8743	33.8048	27.6026	36.3998	6.356	0	542.33	9	234.315	338
A0A087X117	Nodal modulator 1 OS=Homo sapiens GN=NOMO1 PE=1 SV=1	139.381	24.9042	24.0074	29.3959	32.2494	23.6295	31.1518	30.4198	46.3239	0.645	0	359.437	14	242.082	339
P35908	Keratin, type II cytoskeletal 2 epidermal OS=Homo sapiens GN=KRT2 PE=1 SV=2	65.393	23.8472	26.8131	32.4926	26.1777	39.1317	21.4547	32.165	30.0227	2.427	2	692.04	18	232.105	340
P57088	Transmembrane protein 33 OS=Homo sapiens GN=TMEM33 PE=1 SV=2	27.96	28.1828	25.6794	28.5416	28.9345	25.2314	32.3766	28.7661	41.5706	7.254	0	186.83	8	239.283	341
P43304	Glycerol-3-phosphate dehydrogenase, mitochondrial OS=Homo sapiens GN=GPD2 PE=1 SV=3	80.802	26.9931	25.3293	29.3285	30.3893	25.8386	31.3552	29.2513	38.1618	1.188	0	378.82	14	236.647	342
B3KMR5	cDNA FLJ12434 fis, clone NT2RM1000037, highly similar to Homo sapiens KIAA0690 protein OS=Homo sapiens PE=2 SV=1	143.581	31.752	25.8961	22.9491	24.2822	31.1952	33.1349	25.888	36.3307	1.38	0	655.082	23	231.428	343
H7C2I1	Protein arginine N-methyltransferase 1 OS=Homo sapiens GN=PRMT1 PE=1 SV=1	42.434	25.0727	24.4862	32.4872	36.0934	20.6361	28.5296	29.7441	42.9352	6.079	0	491.027	13	239.985	344
P02545	Prelamin-A/C OS=Homo sapiens GN=LMNA PE=1 SV=1	74.095	32.5901	27.8015	24.2913	23.8482	32.3425	35.6045	22.7304	29.7262	2.594	0	435.16	22	228.935	345
Q9BWF3	RNA-binding protein 4 OS=Homo sapiens GN=RBM4 PE=1 SV=1	40.289	33.4724	25.3245	22.34	20.0352	36.0361	33.6987	23.5153	31.7876	5.19	0	338.44	16	226.21	346
Q9NTJ5	Phosphatidylinositide phosphatase SAC1 OS=Homo sapiens GN=SACM1L PE=1 SV=2	66.924	26.6667	26.1343	30.5926	28.4186	24.3496	32.2992	28.2758	38.8211	2.981	0	392.39	15	235.558	347
P15170-3	Isoform 3 of Eukaryotic peptide chain release factor GTP-binding subunit ERF3A OS=Homo sapiens GN=GSPT1	68.656	24.2578	24.791	31.3445	35.3516	21.3715	29.5754	29.0277	41.8729	0.874	0	191.836	9	237.592	348
Q13885	Tubulin beta-2A chain OS=Homo sapiens GN=TUBB2A PE=1 SV=1	49.875	30.9308	23.9598	26.6819	26.2663	30.826	32.0914	24.1682	33.4114	2226.54	3	7859.82	21	228.336	349
Q9Y678	Coatomer subunit gamma-1 OS=Homo sapiens GN=COPG1 PE=1 SV=1	97.655	22.5795	23.955	31.6598	26.7689	25.5548	33.9685	30.9228	37.8912	1.534	0	566.511	19	233.301	350
Q9H8Y8-3	Isoform 3 of Golgi reassembly-stacking protein 2 OS=Homo sapiens GN=GORASP2	48.644	35.1591	45.7594	62.1311	47.2071	10.1838	11.9367	10.3389	15.852	3.394	1	322.699	7	238.568	351
P00390	Glutathione reductase, mitochondrial OS=Homo sapiens GN=GSR PE=1 SV=2	56.221	24.5084	24.3171	37.5406	39.2466	18.2607	26.1905	28.0777	38.8556	5.21	0	682.427	15	236.997	352
Q9BU23	Lipase maturation factor 2 OS=Homo sapiens GN=LMF2 PE=1 SV=2	79.647	26.9299	27.3108	29.9646	28.9611	23.5608	30.1392	26.2233	39.3163	2.728	0	377.718	12	232.406	353
Q9BS26	Endoplasmic reticulum resident protein 44 OS=Homo sapiens GN=ERP44 PE=1 SV=1	46.941	27.6775	32.6553	39.9124	36.9836	18.369	24.2648	23.5484	31.1052	2.831	1	216.2	11	234.516	354
O43823	A-kinase anchor protein 8 OS=Homo sapiens GN=AKAP8 PE=1 SV=1	76.061	29.9664	25.0768	26.3423	23.7087	32.8536	30.8732	25.3164	30.3423	2.047	0	438.637	12	224.48	355
Q15392	Delta(24)-sterol reductase OS=Homo sapiens GN=DHCR24 PE=1 SV=2	60.062	27.0858	25.0911	25.5688	22.4731	28.3392	32.7724	28.6188	38.6627	1.291	0	189.895	6	228.612	356
Q9NU22	Midasin OS=Homo sapiens GN=MDN1 PE=1 SV=2	632.42	27.1531	25.6175	28.8299	30.3871	25.0865	29.7943	27.4985	34.6522	0.244	0	492.15	30	229.019	357
O00567	Nucleolar protein 56 OS=Homo sapiens GN=NOP56 PE=1 SV=4	66.009	31.3498	25.3864	20.4615	23.3345	28.15	33.6567	26.4544	37.1685	1.783	0	528.442	13	225.962	358
P09651	Heterogeneous nuclear ribonucleoprotein A1 OS=Homo sapiens GN=HNRNPA1 PE=1 SV=5	38.723	28.9325	28.1563	22.9222	34.1913	21.2189	33.6236	25.9311	33.5265	4.012	0	348.614	8	228.502	359
Q8TC07-3	Isoform 3 of TBC1 domain family member 15 OS=Homo sapiens GN=TBC1D15	78.522	29.8042	24.2837	26.4151	27.0125	28.4978	30.2917	25.2859	33.9008	1.61	0	294.267	12	225.492	360
P55060	Exportin-2 OS=Homo sapiens GN=CSE1L PE=1 SV=3	110.346	23.3355	23.5001	31.8431	34.167	20.7902	29.2791	29.4977	39.1695	0.814	0	408.387	13	231.582	361
P49821	NADH dehydrogenase [ubiquinone] flavoprotein 1, mitochondrial OS=Homo sapiens GN=NDUFV1 PE=1 SV=4	50.785	22.7101	22.5856	25.9219	26.5807	21.4249	35.253	30.524	40.7529	2.3	0	377.201	10	225.753	362
Q9NS86	LanC-like protein 2 OS=Homo sapiens GN=LANCL2 PE=1 SV=1	50.821	21.9541	22.4641	30.8432	34.787	17.9174	27.1389	30.2877	43.3585	4.109	0	419.918	13	228.751	363
P52292	Importin subunit alpha-1 OS=Homo sapiens GN=KPNA2 PE=1 SV=1	57.826	27.4901	23.4096	27.2587	28.1174	25.3351	29.131	25.2453	33.8461	1.212	0	229.15	10	219.833	364
P43307	Translocon-associated protein subunit alpha OS=Homo sapiens GN=SSR1 PE=1 SV=3	32.215	18.7829	20.9089	25.9353	27.9469	19.3179	30.4929	33.4427	49.7528	3.642	0	372.076	5	226.58	365
Q6ZXV5	Transmembrane and TPR repeat-containing protein 3 OS=Homo sapiens GN=TMTC3 PE=1 SV=2	103.942	22.2532	24.4457	29.1776	30.7104	18.5017	29.089	29.5764	40.9775	1.096	0	313.355	16	224.731	366
O75131	Copine-3 OS=Homo sapiens GN=CPNE3 PE=1 SV=1	60.092	27.389	24.267	24.1889	23.6689	25.564	28.2068	25.5018	39.2069	2.981	3	370.493	16	217.993	367
Q9UBN7	Histone deacetylase 6 OS=Homo sapiens GN=HDAC6 PE=1 SV=2	131.336	20.9876	21.7853	30.0993	35.3051	19.2828	27.8708	28.0828	37.1109	1.572	0	533.375	12	220.525	368
Q7Z7H5	Transmembrane emp24 domain-containing protein 4 OS=Homo sapiens GN=TMED4 PE=1 SV=1	25.926	34.1209	45.9904	48.9114	40.3228	10.852	13.1196	12.0028	15.616	7.577	0	456.65	8	220.936	369
P40227	T-complex protein 1 subunit zeta OS=Homo sapiens GN=CCT6A PE=1 SV=3	57.988	24.1546	20.442	29.0914	30.3052	24.1039	28.9099	25.7279	33.0687	2.282	0	495.132	13	215.804	370
O14744	Protein arginine N-methyltransferase 5 OS=Homo sapiens GN=PRMT5 PE=1 SV=4	72.638	25.2601	23.9598	28.3718	30.8787	23.0467	26.2258	25.0497	33.3854	0.725	0	163.908	8	216.178	371
O94832	Unconventional myosin-Id OS=Homo sapiens GN=MYO1D PE=1 SV=2	116.129	24.9379	21.671	23.2887	25.6152	26.3421	28.4102	25.5171	37.799	0.792	0	366.814	17	213.581	372
Q13423	NAD(P) transhydrogenase, mitochondrial OS=Homo sapiens GN=NNT PE=1 SV=3	113.823	23.1502	21.9973	24.6417	27.7233	19.1394	31.2689	27.4477	40.0303	2.775	0	490.627	25	215.399	373
Q9BTV4	Transmembrane protein 43 OS=Homo sapiens GN=TMEM43 PE=1 SV=1	44.847	24.7168	23.8288	25.1726	26.4279	21.048	28.9209	26.6754	36.7367	2.675	0	190.797	11	213.527	374
Q9H9B4	Sideroflexin-1 OS=Homo sapiens GN=SFXN1 PE=1 SV=4	35.596	24.2894	22.6689	25.3963	28.1462	22.4883	28.5429	25.2503	33.6561	7.913	0	750.724	12	210.438	375
O14787-2	Isoform 2 of Transportin-2 OS=Homo sapiens GN=TNPO2	100.343	22.3311	21.5352	28.0241	31.9083	18.4376	26.2104	26.2436	39.2414	1.404	3	303.91	14	213.932	376
A0AVT1	Ubiquitin-like modifier-activating enzyme 6 OS=Homo sapiens GN=UBA6 PE=1 SV=1	117.895	21.7878	20.0086	27.6656	31.4699	19.4003	25.7372	27.2927	39.466	1.235	0	689.798	17	212.828	377
P51970	NADH dehydrogenase [ubiquinone] 1 alpha subcomplex subunit 8 OS=Homo sapiens GN=NDUFA8 PE=1 SV=3	20.092	23.8703	21.1613	23.3211	25.0019	19.8321	33.4179	26.6297	37.0274	4.337	0	104.243	6	210.262	378
Q08379	Golgin subfamily A member 2 OS=Homo sapiens GN=GOLGA2 PE=1 SV=3	113.017	29.5242	36.7066	44.1788	37.2227	13.8683	16.0335	14.3653	19.7301	1.049	0	462.286	17	211.629	379
Q9BUN8	Derlin-1 OS=Homo sapiens GN=DERL1 PE=1 SV=1	28.782	15.4875	23.1143	22.305	20.6197	18.819	36.1064	33.8974	42.5437	9	0	376.24	6	212.893	380
Q6PKG0	La-related protein 1 OS=Homo sapiens GN=LARP1 PE=1 SV=2	123.434	26.3235	23.2834	22.7524	21.1711	26.9752	29.6682	22.9184	30.1292	1.909	1	513.008	27	203.221	381
P60866	40S ribosomal protein S20 OS=Homo sapiens GN=RPS20 PE=1 SV=1	13.364	24.8348	23.2239	20.1408	20.7305	28.3987	28.4213	22.4002	33.9209	30.623	0	253.634	5	202.071	382
O75190	DnaJ homolog subfamily B member 6 OS=Homo sapiens GN=DNAJB6 PE=1 SV=2	36.065	26.9405	22.8237	24.2132	22.1521	27.2941	27.7138	21.8032	28.8884	5.105	6	324.629	8	201.829	383
Q5H9R7-5	Isoform 5 of Serine/threonine-protein phosphatase 6 regulatory subunit 3 OS=Homo sapiens GN=PPP6R3	98.423	24.0198	21.1875	25.1996	24.5103	25.4358	27.1014	24.28	30.7482	1.512	0	403.697	18	202.483	384
P49458	Signal recognition particle 9 kDa protein OS=Homo sapiens GN=SRP9 PE=1 SV=2	10.105	26.9068	20.8993	17.982	18.4032	27.7747	27.1743	21.5339	40.7069	25.827	0	215.88	6	201.381	385
Q14697-2	Isoform 2 of Neutral alpha-glucosidase AB OS=Homo sapiens GN=GANAB	109.369	21.2656	22.0854	24.7306	27.7676	20.7307	27.1213	24.6712	37.3988	1.096	0	396.071	13	205.771	386
Q13190	Syntaxin-5 OS=Homo sapiens GN=STX5 PE=1 SV=2	39.648	20.3075	23.6764	29.5388	29.0164	18.578	27.024	25.1157	33.6302	1.721	0	311.64	9	206.887	387
H0Y368	Dolichol-phosphate mannosyltransferase subunit 1 (Fragment) OS=Homo sapiens GN=DPM1 PE=1 SV=1	33.307	22.3353	21.6329	23.2294	22.4089	26.2231	28.7175	24.6534	32.4152	4.456	0	350.75	10	201.616	388
Q6IBR2	FARSLA protein OS=Homo sapiens GN=FARSLA PE=2 SV=1	57.528	23.7272	22.1354	26.1564	27.059	21.2403	26.0799	25.4942	31.8279	3.894	0	528.234	14	203.72	389
P14866	Heterogeneous nuclear ribonucleoprotein L OS=Homo sapiens GN=HNRNPL PE=1 SV=2	64.092	23.3608	23.1262	21.4479	28.9965	19.0098	29.2106	24.8236	34.5054	2.415	5	451.736	13	204.481	390
P06733	Alpha-enolase OS=Homo sapiens GN=ENO1 PE=1 SV=2	47.139	19.4189	19.0464	31.4739	31.45	19.858	31.4723	21.5822	28.1225	1.593	0	305.005	10	202.424	391
Q9Y3A6	Transmembrane emp24 domain-containing protein 5 OS=Homo sapiens GN=TMED5 PE=1 SV=1	25.988	28.0881	37.9546	59.002	43.9941	7.80987	10.577	9.14753	11.1074	2.831	0	233.02	4	207.681	392
Q9Y673	Dolichyl-phosphate beta-glucosyltransferase OS=Homo sapiens GN=ALG5 PE=1 SV=1	36.922	24.2662	23.262	25.8437	23.0732	24.4991	27.2451	22.3824	28.3586	1.994	0	316.96	8	198.93	393
P37108	Signal recognition particle 14 kDa protein OS=Homo sapiens GN=SRP14 PE=1 SV=2	14.561	26.4098	20.3825	19.4131	20.2655	28.4872	28.5738	21.8819	29.3577	6.499	0	260.275	4	194.771	394
Q9Y5M8	Signal recognition particle receptor subunit beta OS=Homo sapiens GN=SRPRB PE=1 SV=3	29.684	20.457	20.4587	22.6095	22.606	20.2593	28.8281	27.4045	39.1464	5.158	0	511.63	9	201.77	395
P61011	Signal recognition particle 54 kDa protein OS=Homo sapiens GN=SRP54 PE=1 SV=1	55.668	24.6516	18.8082	18.7312	20.8766	29.6131	29.383	21.6482	29.7319	1.246	0	364.84	10	193.444	396
P55084	Trifunctional enzyme subunit beta, mitochondrial OS=Homo sapiens GN=HADHB PE=1 SV=3	51.262	24.4852	23.5549	27.008	25.1436	20.3188	26.6923	23.2867	28.1715	2.282	1	315.695	15	198.661	397
Q8WUY1	Protein THEM6 OS=Homo sapiens GN=THEM6 PE=1 SV=2	23.85	21.891	23.2167	27.4689	27.6259	18.7153	26.2059	23.9523	30.5006	3.217	0	116.36	8	199.577	398
Q9P0H9	Protein RER1 OS=Homo sapiens GN=RER1 PE=1 SV=1	24.801	20.518	24.8934	30.0185	27.6192	16.8647	25.7991	24.2114	31.3384	3.924	0	292.89	4	201.263	399
P67809	Nuclease-sensitive element-binding protein 1 OS=Homo sapiens GN=YBX1 PE=1 SV=3	35.903	24.0009	21.0232	22.5934	21.5077	24.6776	27.6077	22.0699	30.6216	12.895	2	703.05	12	194.102	400
Q13263	Transcription intermediary factor 1-beta OS=Homo sapiens GN=TRIM28 PE=1 SV=5	88.493	24.2304	19.4084	25.3397	26.5851	21.4401	24.603	22.7609	31.7012	1.907	0	440.89	17	196.069	401
Q7L1Q6-3	Isoform 3 of Basic leucine zipper and W2 domain-containing protein 1 OS=Homo sapiens GN=BZW1	51.249	23.5482	20.5349	24.1835	23.319	22.6942	25.9871	22.6999	31.1081	1.207	1	111.06	9	194.075	402
Q96EY1	DnaJ homolog subfamily A member 3, mitochondrial OS=Homo sapiens GN=DNAJA3 PE=1 SV=2	52.456	23.8767	19.949	24.0676	21.6273	24.3999	27.0063	22.6745	26.3116	1.424	0	282.809	7	189.913	403
P45880-1	Isoform 1 of Voltage-dependent anion-selective channel protein 2 OS=Homo sapiens GN=VDAC2	33.351	18.5387	18.7082	23.1432	25.2477	16.5382	29.058	25.5298	39.8633	6.848	0	512.97	10	196.627	404
Q32Q12	Nucleoside diphosphate kinase OS=Homo sapiens GN=NME1-NME2 PE=1 SV=1	32.621	20.0021	18.9678	27.574	29.3574	17.5268	24.603	24.5264	32.4613	1.994	0	102.237	9	195.019	405
P00387-3	Isoform 3 of NADH-cytochrome b5 reductase 3 OS=Homo sapiens GN=CYB5R3	38.202	20.8128	18.994	22.0624	22.6326	23.1824	28.1361	22.6897	31.8941	2.981	0	349.234	7	190.404	406
P60981	Destrin OS=Homo sapiens GN=DSTN PE=1 SV=3	18.493	18.7935	18.3271	27.4904	28.3123	16.3017	24.1852	24.8566	37.7472	13.251	0	280.78	10	196.014	407
O94905	Erlin-2 OS=Homo sapiens GN=ERLIN2 PE=1 SV=1	37.815	22.569	26.1152	30.7327	32.8583	13.4045	20.3249	20.3044	28.6321	4.109	2	391.522	13	194.941	408
P55265-4	Isoform 4 of Double-stranded RNA-specific adenosine deaminase OS=Homo sapiens GN=ADAR	140.749	23.9103	20.6064	18.7016	20.7991	23.2389	27.7845	22.3798	29.5246	0.54	0	312.704	14	186.945	409
P11388-4	Isoform 4 of DNA topoisomerase 2-alpha OS=Homo sapiens GN=TOP2A	182.567	22.868	21.3399	20.7445	23.0909	22.5432	27.6696	20.4492	28.4018	0.428	3	241.923	15	187.107	410
Q96CS3	FAS-associated factor 2 OS=Homo sapiens GN=FAF2 PE=1 SV=2	52.591	19.661	19.8681	20.8631	22.0413	19.1959	27.1986	24.8337	36.5063	7.432	0	602.34	17	190.168	411
[truncated: 1,720 more rows]

## Sheet: Normalized2
Accession	Description	MW [kDa]	Abundance: F1: 126, Sample, 0 , WT	Abundance: F1: 127N, Sample, 30 , WT	Abundance: F1: 127C, Sample, 60 , WT	Abundance: F1: 128N, Sample, 120 , WT	Abundance: F1: 129N, Sample, 0 , KO	Abundance: F1: 130N, Sample, 30 , KO	Abundance: F1: 130C, Sample, 60 , KO	Abundance: F1: 131, Sample, 120 , KO	emPAI	# Razor Peptides	Score Mascot	# Peptides	Abund. Rank	Notes
[truncated: 2,131 more rows]

[truncated: 3 more sheets: WT vs KO 0 min, WT vs KO 60min, 0 vs 60 min]
