# Supplementary figures and images for: Misfolded GPI-anchored proteins are escorted through the secretory pathway by ER-derived factors
Source: eLife journal article supplement (doi:10.7554/elife.46740), 2019-05-16

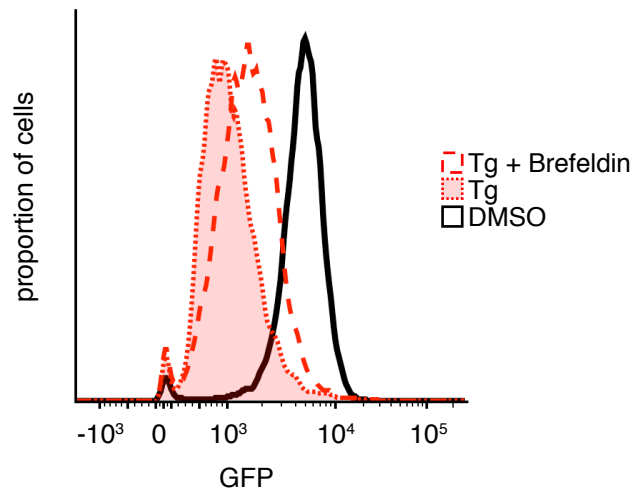

**Fig. 1 – figure supplement 1. Effect of Brefeldin A on GFP-PrP\* degradation.**

Supplement: supp [file elife_poa_e46740_Figure_1_figure_supplement_1.pdf › elife_poa_e46740_Figure_1_figure_supplement_1.pdf]

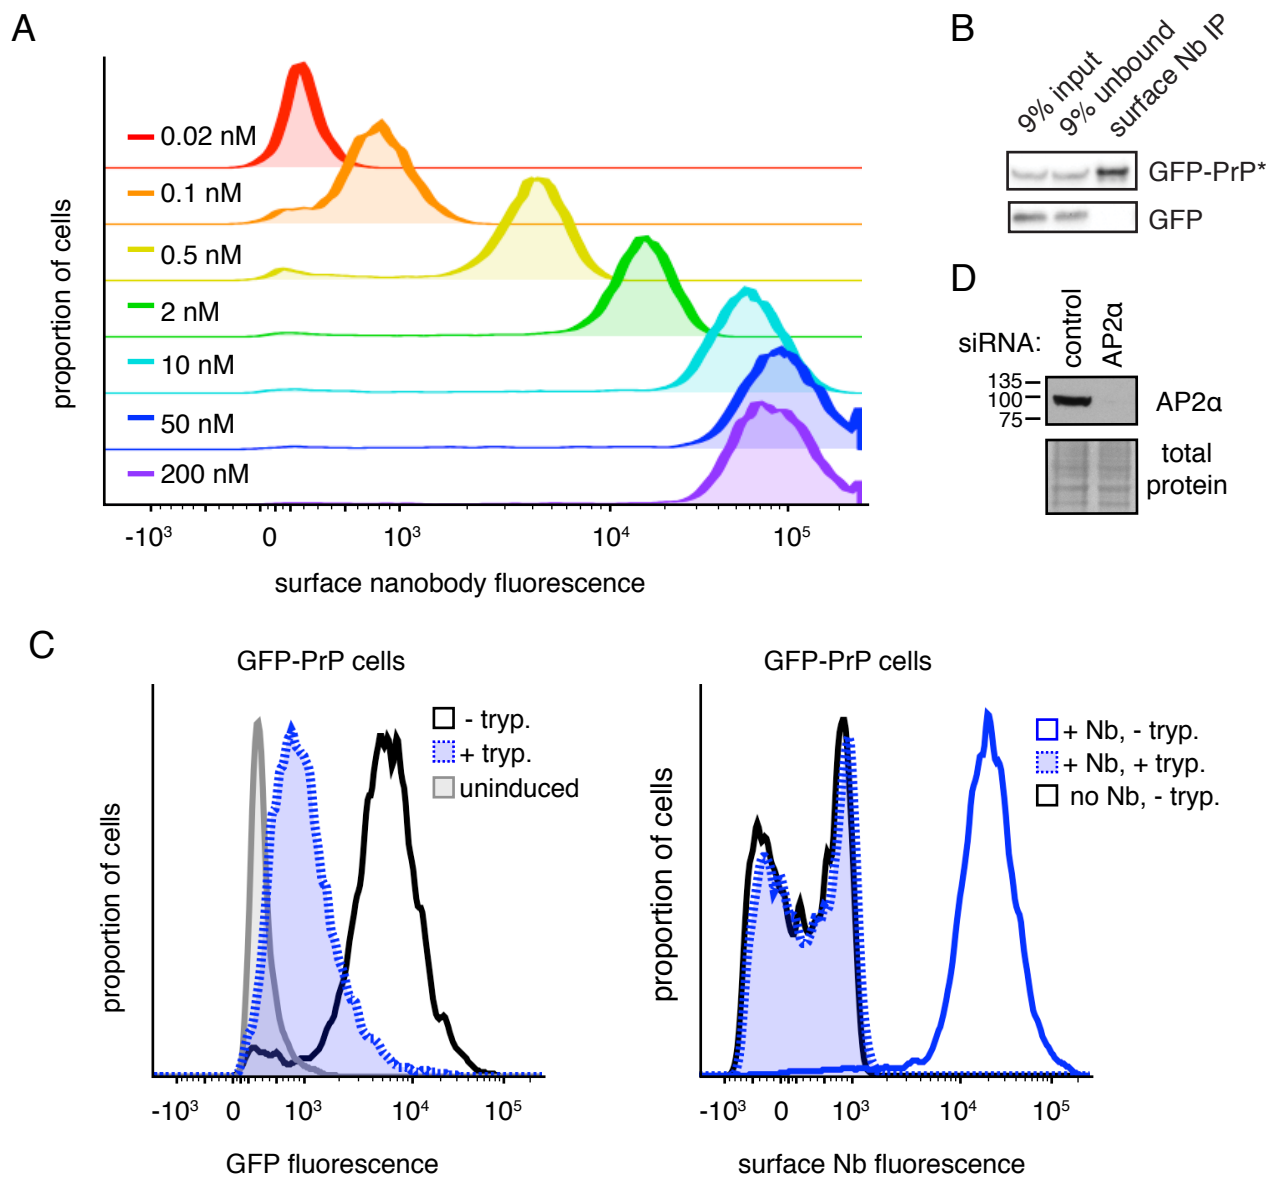

**Fig. 2 – figure supplement 1. Characterization of Nb surface staining and isolation.**

Supplement: supp [file elife_poa_e46740_Figure_2_figure_supplement_1.pdf › elife_poa_e46740_Figure_2_figure_supplement_1.pdf]

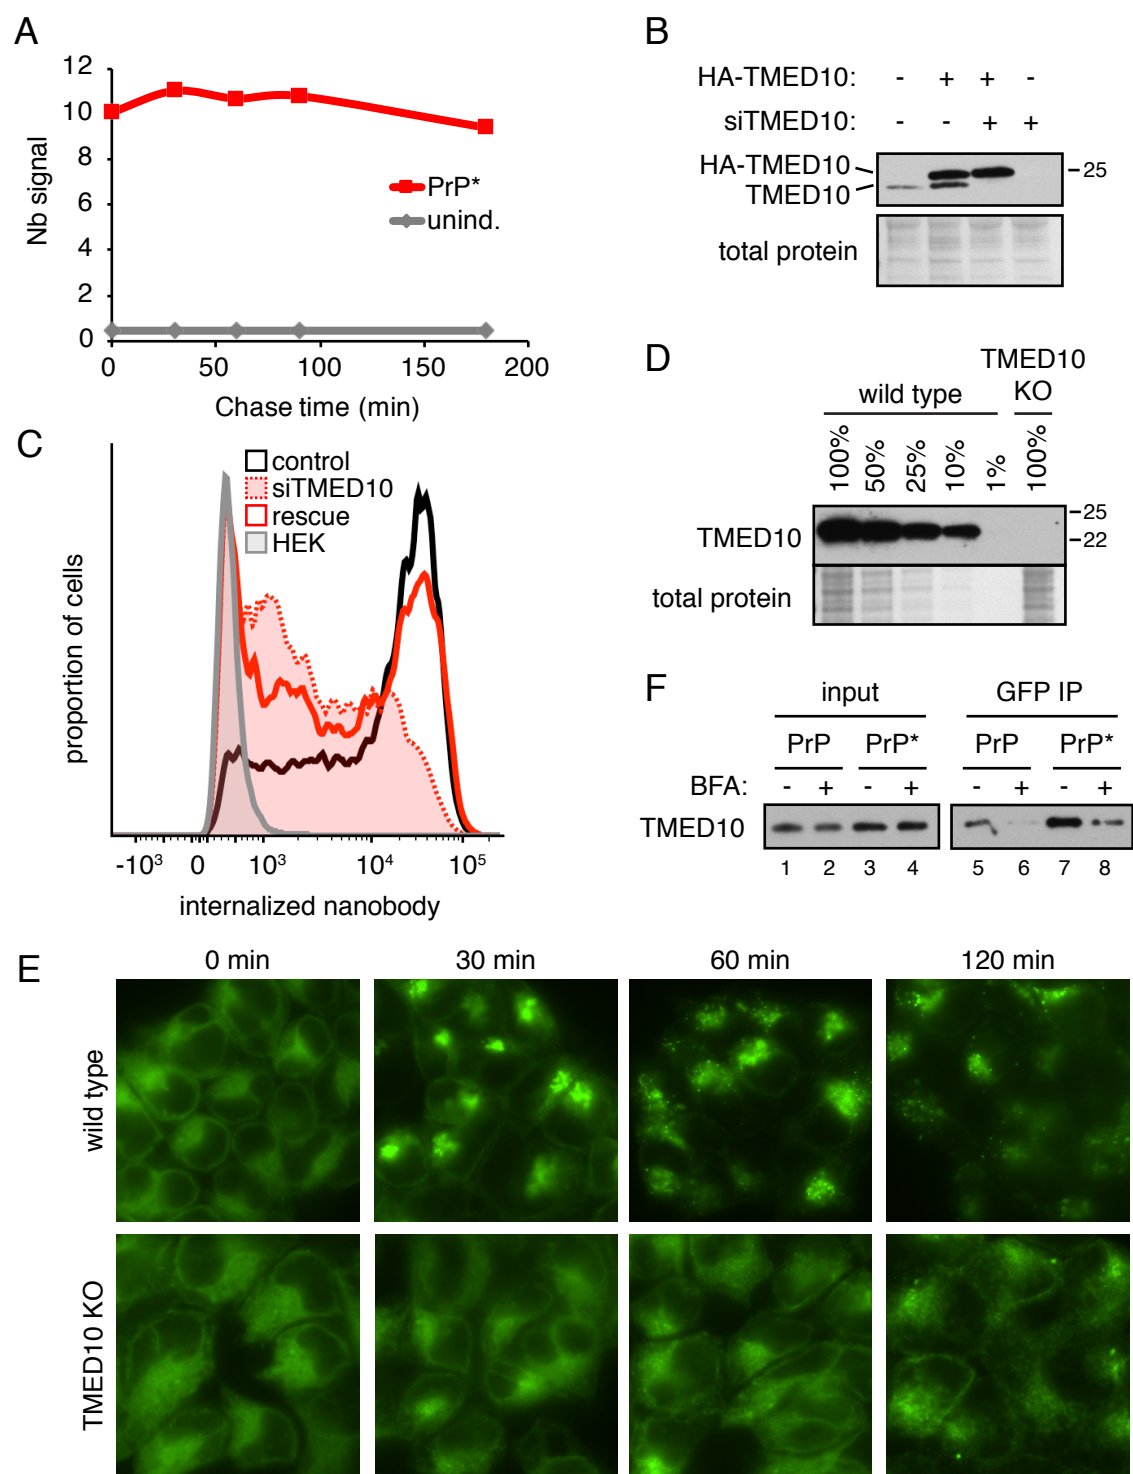

Fig. 3 – figure supplement 1. Additional characterization of GFP-PrP\* trafficking.

Supplement: supp [file elife_poa_e46740_Figure_3_figure_supplement_1.pdf › elife_poa_e46740_Figure_3_figure_supplement_1.pdf]

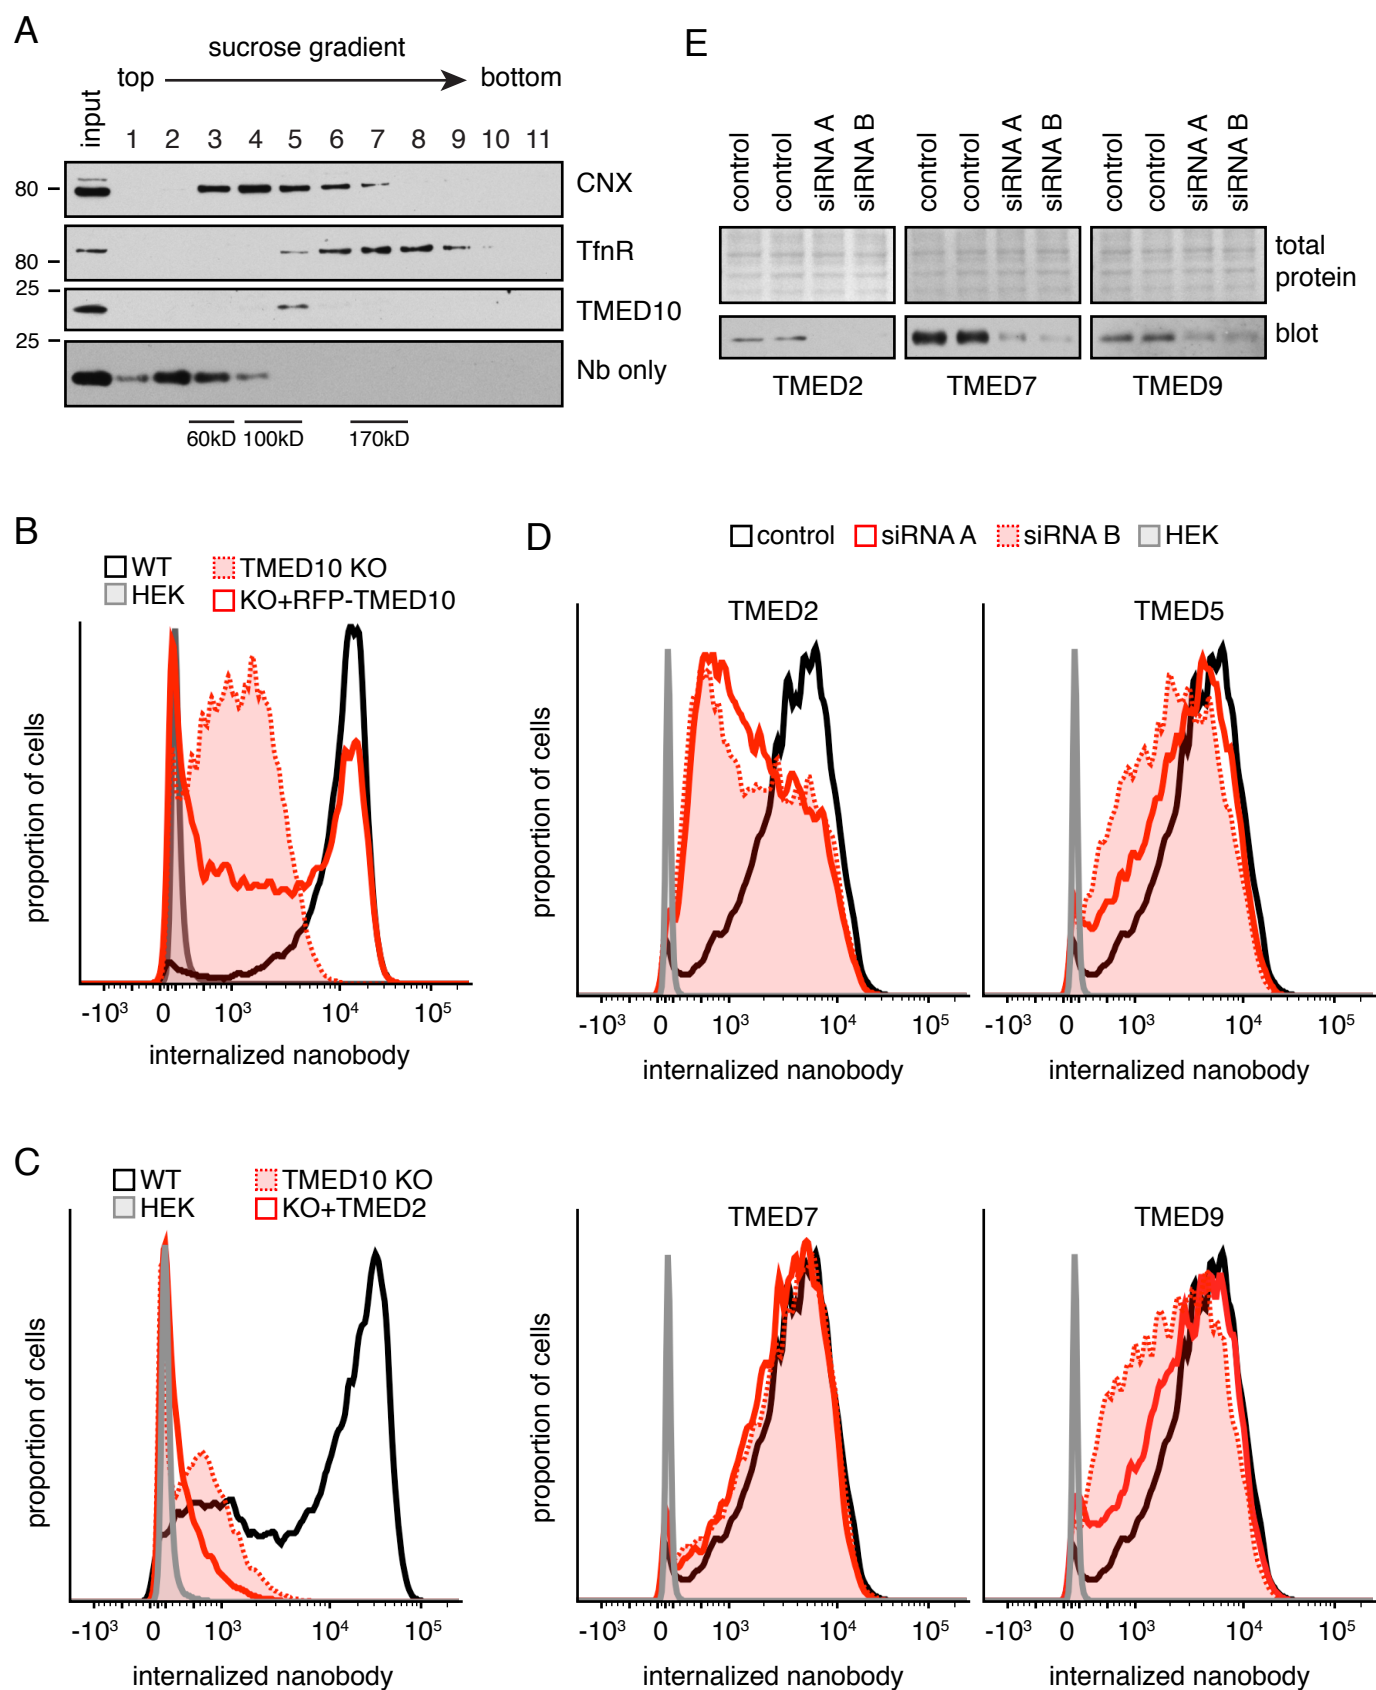

**Fig. 4 – figure supplement 1. Additional characterization of TMED family members.**

Supplement: supp [file elife_poa_e46740_Figure_4_figure_supplement_1.pdf › elife_poa_e46740_Figure_4_figure_supplement_1.pdf]

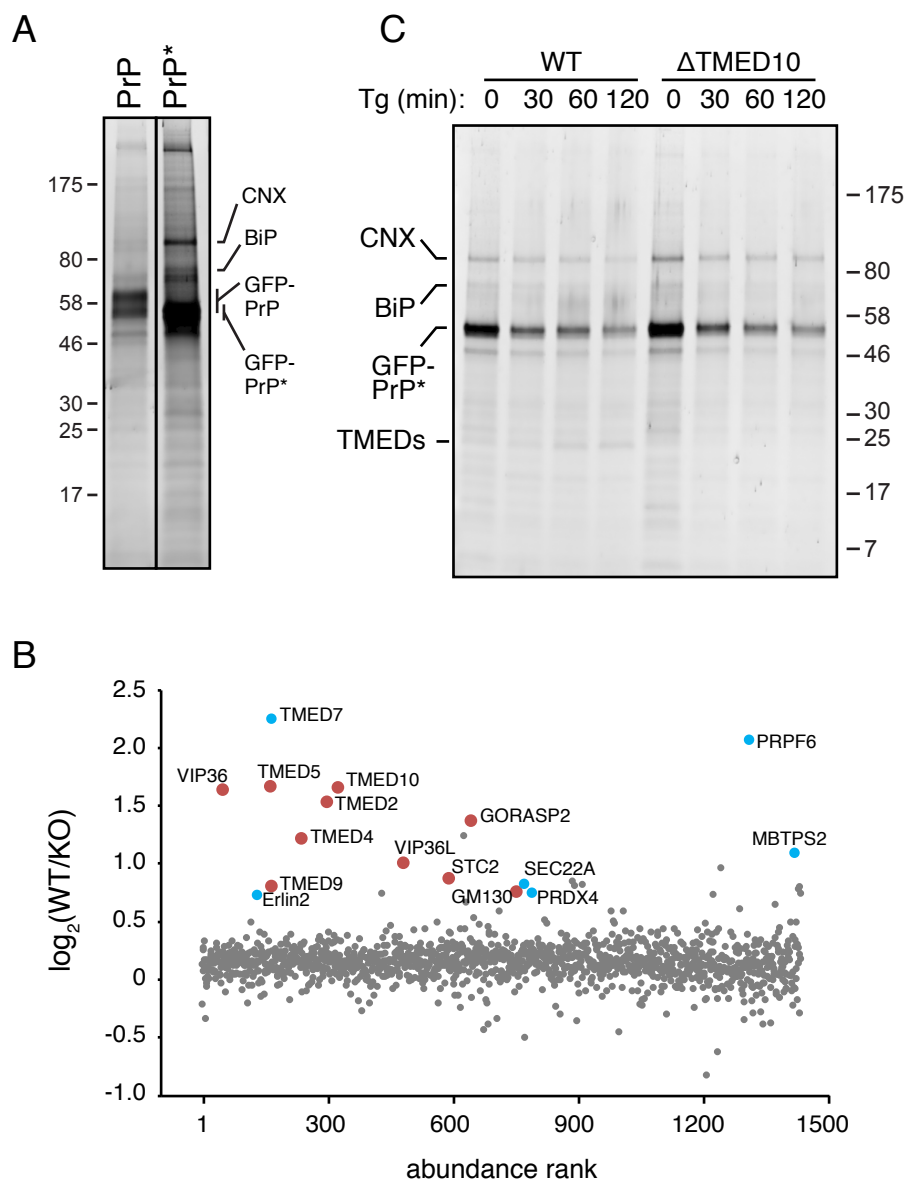

**Fig. 5 – figure supplement 1. Additional analysis of GFP-PrP\* interaction partners.**

Supplement: supp [file elife_poa_e46740_Figure_5_figure_supplement_1.pdf › elife_poa_e46740_Figure_5_figure_supplement_1.pdf]

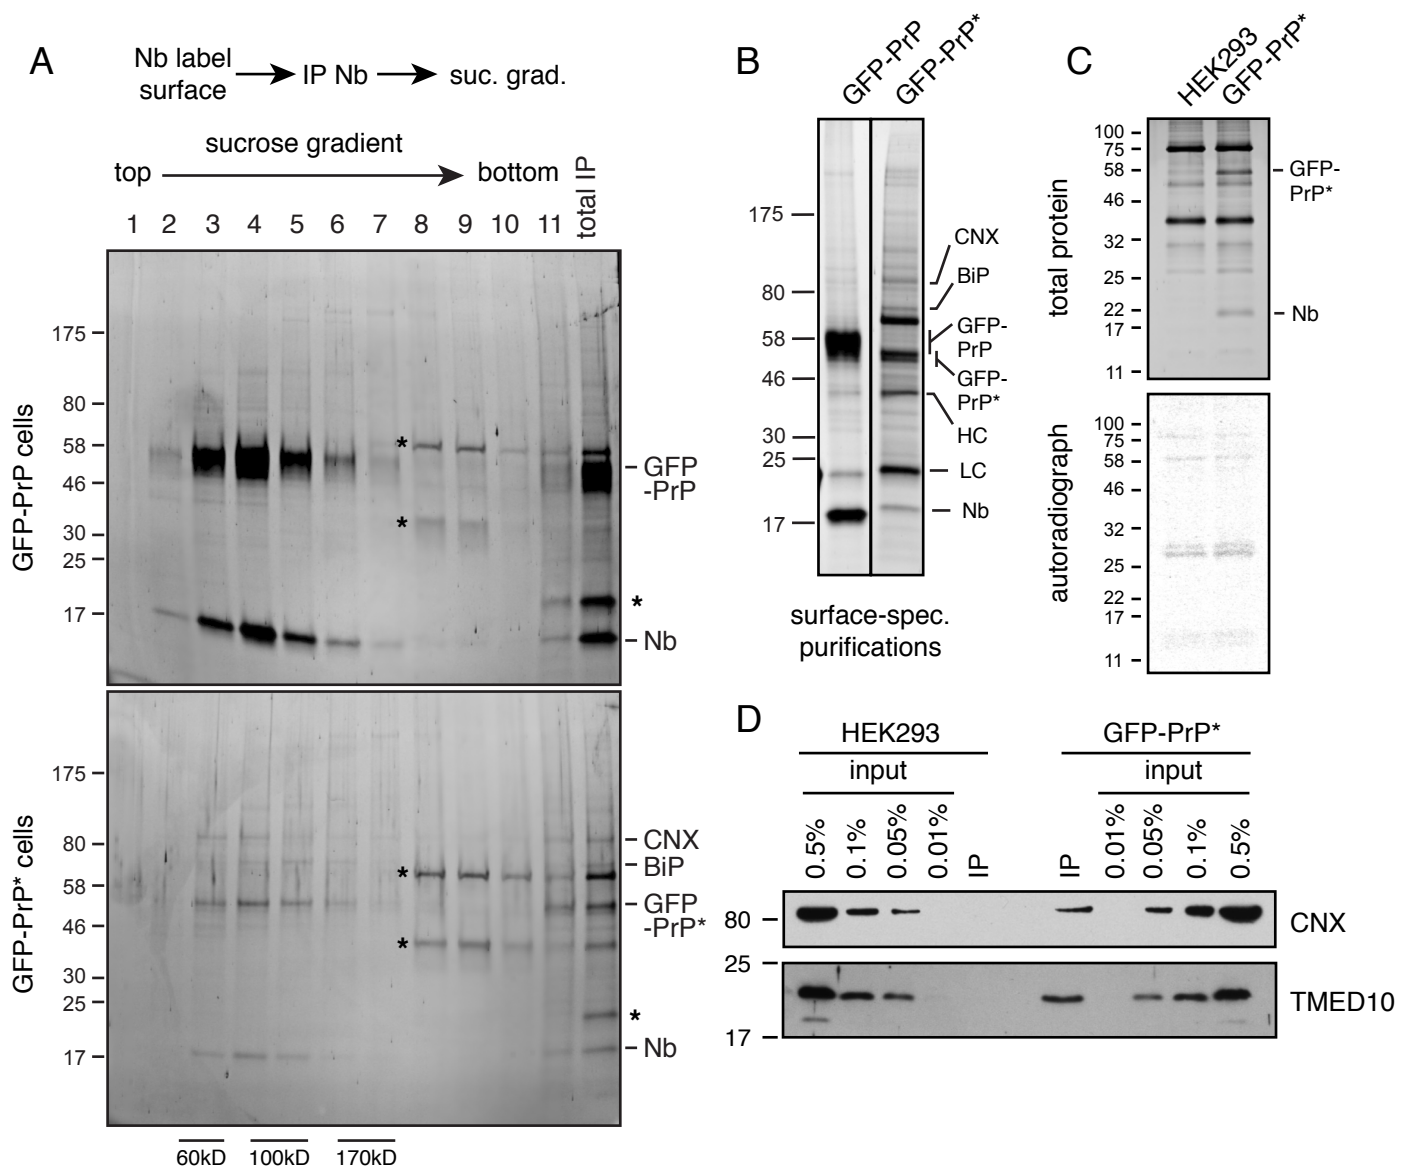

**Fig. 6 – figure supplement 1. Characterization of cell surface GFP-PrP\* complexes.**

Supplement: supp [file elife_poa_e46740_Figure_6_figure_supplement_1.pdf › elife_poa_e46740_Figure_6_figure_supplement_1.pdf]

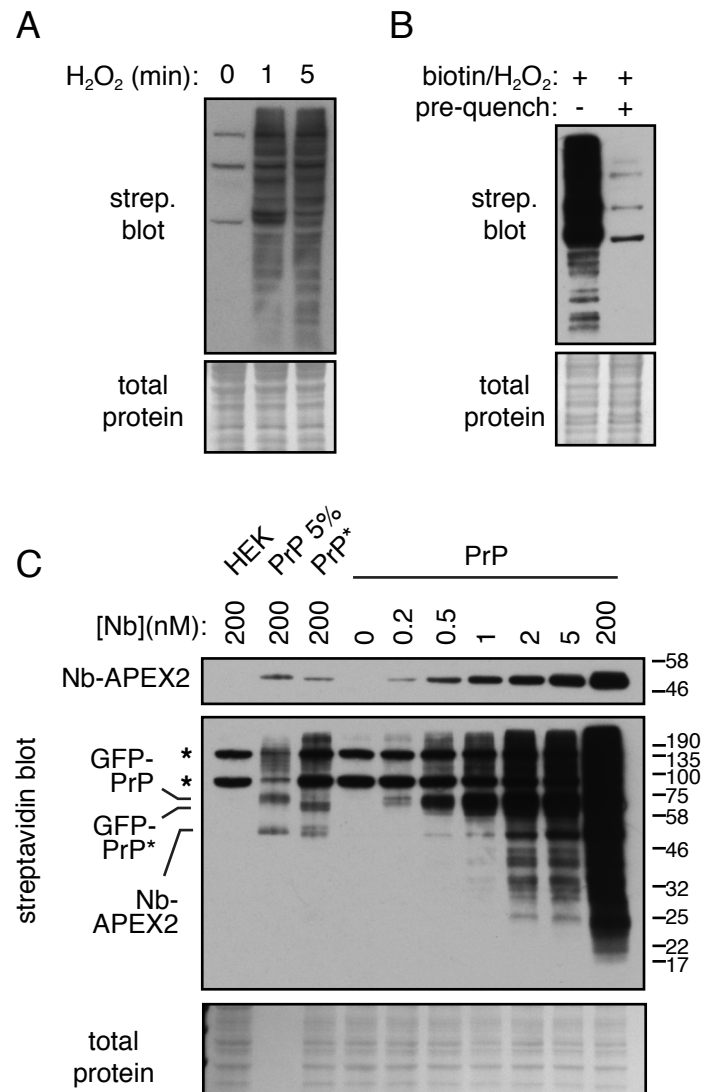

Fig. 6 – figure supplement 2. Characterization of APEX2-mediated biotinylation.

Supplement: supp [file elife_poa_e46740_Figure_6_figure_supplement_2.pdf › elife_poa_e46740_Figure_6_figure_supplement_2.pdf]

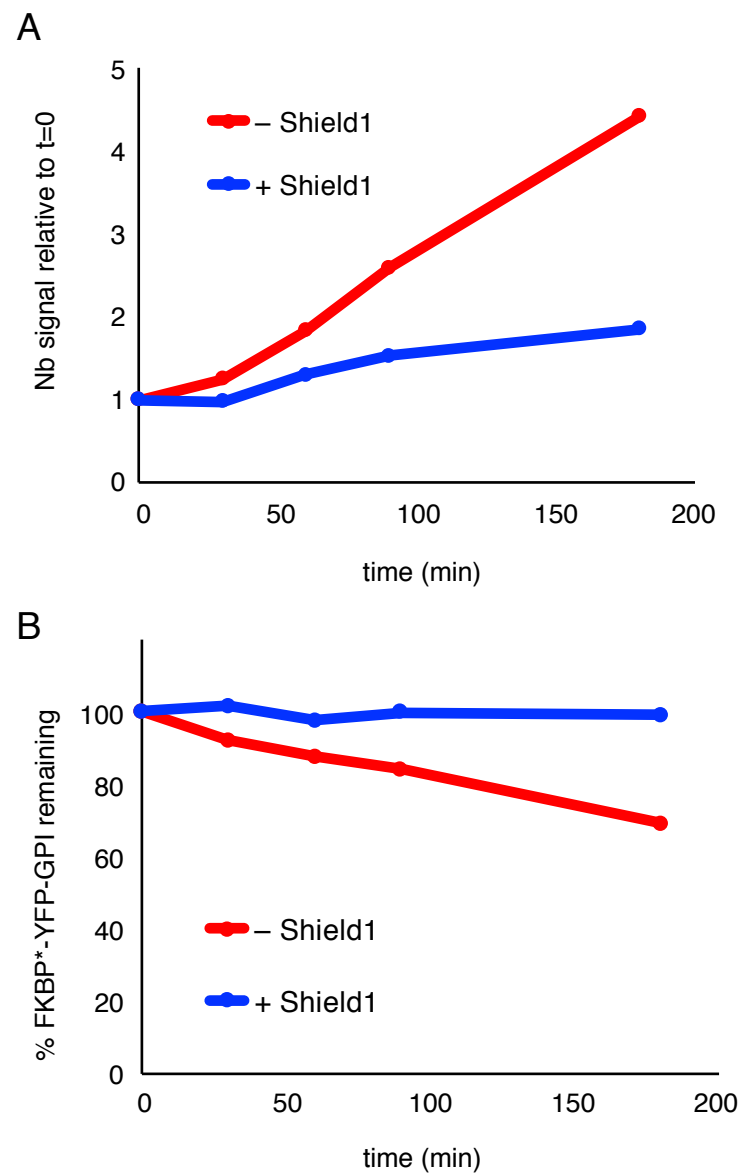

Fig. 7 – figure supplement 1. Characterization of FKBP\*-YFP-GFP cells.

Supplement: supp [file elife_poa_e46740_Figure_7_figure_supplement_1.pdf › elife_poa_e46740_Figure_7_figure_supplement_1.pdf]
